# Supplementary material for: Transcriptome reprogramming and myeloid skewing in haematopoietic stem and progenitor cells in systemic lupus erythematosus
Source: Ann Rheum Dis. 2019 Nov 28;79(2):242–53. doi: 10.1136/annrheumdis-2019-215782 (PMC7025734; doi:10.1136/annrheumdis-2019-215782)
Supplement: Supplementary data [file annrheumdis-2019-215782supp002.xlsx]

## Sheet: 1. CD34+ cells
Bone Marrow-Derived CD34+ cells from 'Sle.Female Patients vs Healthy.Female Donors' (|FC|1.5, FDR<0.05)
Gene name	logFC	logCPM	LR	PValue	FDR
COL1A1	-7.78356	6.80795	105.289	1.0556e-24	1.88393e-20
COL1A2	-6.17101	6.2975	51.5961	6.81759e-13	6.08368e-09
LINC00926	-3.42563	4.6218	45.208	1.77182e-11	1.05405e-07
SLC1A7	-5.73906	-1.87384	37.2323	1.04863e-09	4.67872e-06
GNLY	-4.55012	4.95925	32.2753	1.33803e-08	4.07216e-05
COL6A2	-2.66147	3.98263	31.7119	1.7882e-08	4.07216e-05
MYBL1	-3.09893	3.26675	31.675	1.8225e-08	4.07216e-05
PF4V1	-4.82946	3.4561	31.5597	1.93401e-08	4.07216e-05
CHAD	-3.68294	1.48987	31.4433	2.05354e-08	4.07216e-05
SEMA5A	-5.2373	0.0293118	31.1485	2.39019e-08	4.26578e-05
BANK1	-2.5255	5.66465	30.6147	3.14698e-08	5.10583e-05
EML6	-2.79046	3.05263	30.0014	4.3173e-08	6.42091e-05
BMP3	-5.7089	0.407192	29.0976	6.88222e-08	9.44823e-05
ZNF683	-4.55147	0.922804	28.1507	1.12228e-07	0.000143067
FCER2	-2.98568	2.35172	25.6274	4.1411e-07	0.000492708
PRSS23	-2.93249	1.97729	24.7908	6.39027e-07	0.000706438
B3GAT1	-4.10838	0.288279	24.6912	6.72911e-07	0.000706438
CHRNA2	-4.10997	1.75633	24.3707	7.94664e-07	0.00078791
RAMP3	-4.77816	2.49449	24.2277	8.55941e-07	0.000803999
CDHR3	-4.80421	-0.586993	24.0953	9.16829e-07	0.000818132
CDH15	-4.209	-1.15827	23.2929	1.39114e-06	0.00111948
NFATC4	-2.9736	1.26785	23.2736	1.40515e-06	0.00111948
PLCH2	-3.36223	2.04929	23.1178	1.52371e-06	0.00111948
PRKCG	-3.71968	-1.12538	23.08	1.55396e-06	0.00111948
IL12RB2	2.73994	4.29565	22.9962	1.62326e-06	0.00111948
RASAL1	-4.62296	0.642948	22.9871	1.63088e-06	0.00111948
MYO3A	-4.87411	-2.14625	22.8652	1.73768e-06	0.00113157
FUNDC2P2	-6.63055	-2.66484	22.7655	1.83024e-06	0.00113157
ROR1	-4.03972	-1.33306	22.7167	1.87726e-06	0.00113157
IKZF3	-3.48144	4.1183	22.6915	1.90212e-06	0.00113157
TNFRSF13C	-2.95251	2.15323	22.5242	2.07509e-06	0.00116808
PROX1	-5.8015	-2.28391	22.5065	2.09438e-06	0.00116808
DUSP8	-3.36951	1.50337	22.3606	2.25963e-06	0.00122205
HGF	2.31727	5.1193	22.0869	2.60586e-06	0.00136785
TBX21	-3.69119	2.16667	21.967	2.77384e-06	0.00141442
PEG10	-3.93778	1.13036	21.8699	2.91775e-06	0.00144647
PRF1	-3.42478	4.15252	21.7183	3.15758e-06	0.00151035
TSPYL2	-1.73551	5.95773	21.5734	3.40546e-06	0.00151035
MIR378I	-2.95526	-0.138058	21.5525	3.44275e-06	0.00151035
NMUR1	-3.10172	1.01421	21.5396	3.46593e-06	0.00151035
ZNF365	-4.3947	-0.555464	21.5375	3.46973e-06	0.00151035
LOC339862	8.07331	0.649792	21.4053	3.71748e-06	0.00157966
FGFBP2	-3.79322	2.64823	21.3083	3.91029e-06	0.00162295
COL19A1	-4.74238	0.99196	21.2341	4.06463e-06	0.00164867
MS4A1	-3.7817	5.58163	20.9898	4.61739e-06	0.00181884
CTTN	-3.05974	6.65185	20.9354	4.75039e-06	0.00181884
FCRL3	-4.16914	2.8537	20.9195	4.78992e-06	0.00181884
MDM1	-1.6741	6.26535	20.8661	4.92544e-06	0.00183134
ITPKB	-1.68984	6.26034	20.6732	5.44745e-06	0.0019841
C15orf52	-2.19098	5.00508	20.5301	5.86996e-06	0.00209522
COL13A1	-5.32909	-1.36745	20.4233	6.20692e-06	0.00215025
NBPF15	-2.55849	2.36233	20.4055	6.2651e-06	0.00215025
PDZD4	-3.67759	2.41511	20.2955	6.63553e-06	0.0022212
LOC100129973	-3.19509	0.890799	20.2711	6.72073e-06	0.0022212
GZMH	-4.01533	2.80282	20.1966	6.98786e-06	0.0022675
LINC00494	-3.64752	0.645396	19.8421	8.41081e-06	0.002641
NCR3	-2.97189	0.660488	19.8367	8.43487e-06	0.002641
ALOX12	-2.46607	5.33948	19.78	8.68892e-06	0.00267364
NDNL2	-1.74736	4.74073	19.6696	9.2056e-06	0.00278462
PYHIN1	-3.54859	2.01523	19.5047	1.00351e-05	0.00288586
OR7A5	-4.2667	-0.44312	19.4545	1.03023e-05	0.00288586
SLC27A6	7.28913	0.0493628	19.4298	1.04366e-05	0.00288586
PLCG1	-1.97515	5.22352	19.4266	1.04538e-05	0.00288586
IRF4	-2.80199	5.21535	19.4041	1.05778e-05	0.00288586
LAT	-2.41223	6.17409	19.396	1.06227e-05	0.00288586
ANKRD30B	-5.23765	-2.26979	19.3671	1.07852e-05	0.00288586
MYBPC2	-2.88974	-0.701422	19.3584	1.08339e-05	0.00288586
LINC01588	-3.09639	1.2183	19.2498	1.14685e-05	0.00300997
FAM102A	-2.09331	4.6809	19.1951	1.18018e-05	0.00305236
RGS9	-3.46176	0.968301	19.1677	1.19721e-05	0.00305236
ZNF831	-3.49313	2.50454	19.0873	1.24873e-05	0.00311421
CD247	-3.52201	3.59636	19.0757	1.25636e-05	0.00311421
LINC00377	-4.51579	-2.41795	18.9746	1.32472e-05	0.00323866
ARL4C	-2.26325	6.19665	18.6941	1.53457e-05	0.00366624
BLK	-3.35971	3.53402	18.6865	1.5407e-05	0.00366624
SPTBN5	-2.74467	1.98315	18.6205	1.59499e-05	0.00374549
PCOLCE	-2.74825	2.42461	18.5723	1.63577e-05	0.00379138
MECOM	2.93134	4.18547	18.4887	1.70912e-05	0.00391059
CCDC92	-1.76342	4.78917	18.4578	1.73708e-05	0.00392426
MIR4697HG	-3.10511	1.81419	18.3781	1.8113e-05	0.00401071
SMTN	-1.99903	4.97499	18.3686	1.82029e-05	0.00401071
SIDT1	-1.83972	4.11363	18.2897	1.89735e-05	0.00404305
NEXN	-2.65963	4.85565	18.2863	1.90073e-05	0.00404305
ASAP2	-2.05786	5.50777	18.2841	1.90293e-05	0.00404305
KLHL31	7.17671	-0.275374	18.1755	2.01456e-05	0.00422191
KLHL14	-3.46507	1.67904	18.1526	2.03891e-05	0.00422191
VEGFC	-3.12166	2.36898	18.1212	2.07282e-05	0.00422191
LINC01515	5.13663	0.465671	18.113	2.08174e-05	0.00422191
ATP13A4	-3.19131	2.81402	18.0312	2.17319e-05	0.00435785
RASA3	-1.73509	6.71674	17.9998	2.20933e-05	0.0043811
TGFBR3	-2.84908	3.57352	17.9563	2.26037e-05	0.00443307
CLIC3	-2.78383	0.705058	17.9241	2.29888e-05	0.00445957
MIAT	-2.67092	5.64179	17.7862	2.47172e-05	0.00474332
SPOCK2	-3.17447	5.59797	17.6618	2.63877e-05	0.00501001
LOC101929125	-4.10724	-0.705001	17.6347	2.67664e-05	0.00502375
SNCA	-1.64712	6.08492	17.6013	2.72401e-05	0.00502375
CHI3L2	-2.87228	0.832878	17.5612	2.78209e-05	0.00502375
KIAA1407	-1.75374	3.56705	17.5244	2.83642e-05	0.00502375
DNM3	-2.56468	5.552	17.5198	2.84327e-05	0.00502375
ALS2CL	-2.12599	3.37568	17.5168	2.84784e-05	0.00502375
C1orf95	-2.85428	2.70797	17.5057	2.86451e-05	0.00502375
SLC35D3	-3.26037	3.00195	17.5012	2.8712e-05	0.00502375
ADAMTS17	-3.14072	0.181698	17.4715	2.91644e-05	0.00505338
FCRLA	-2.69063	2.85637	17.3611	3.09094e-05	0.00528889
NETO1	-4.82312	-1.28201	17.3406	3.12438e-05	0.00528889
IL21R	-3.06698	1.82428	17.3304	3.14127e-05	0.00528889
S1PR5	-3.72608	2.27175	17.308	3.17846e-05	0.00530149
DAAM1	-2.02264	6.53095	17.2254	3.31971e-05	0.00548582
DNAAF3	-3.15656	2.10763	17.1976	3.36868e-05	0.00551567
APBB2	-2.18627	2.67701	17.1619	3.43245e-05	0.00556899
FYN	-1.70995	6.08432	17.122	3.50532e-05	0.00557834
VSIG2	-2.72586	3.06109	17.1163	3.516e-05	0.00557834
EYA1	-3.75776	-0.39977	17.1076	3.53198e-05	0.00557834
RORA	-3.06134	4.34598	17.0453	3.64988e-05	0.00571398
SERPINE1	-3.20024	5.26922	16.9886	3.7604e-05	0.00573079
PRRT2	-2.73655	0.878302	16.9753	3.78691e-05	0.00573079
XYLT2	-1.85602	5.13515	16.9749	3.78774e-05	0.00573079
BCL9L	-2.00157	5.10576	16.9742	3.78906e-05	0.00573079
RHD	-3.20977	3.0052	16.9524	3.83295e-05	0.00574846
INHBA-AS1	-3.47255	1.1163	16.9093	3.92082e-05	0.00581682
GNAZ	-2.96363	5.2184	16.8983	3.94372e-05	0.00581682
MARK1	-3.69815	-1.39741	16.8384	4.07006e-05	0.00592949
BIRC3	-1.84571	5.72849	16.8308	4.08655e-05	0.00592949
GP9	-2.95703	5.77855	16.7932	4.16831e-05	0.00599933
CD6	-3.26109	4.26721	16.7328	4.30303e-05	0.00610022
TC2N	-2.14176	5.50226	16.7264	4.31769e-05	0.00610022
CPE	-3.9265	0.0969114	16.7016	4.37438e-05	0.00610022
PARP15	-1.89305	5.30073	16.7013	4.37512e-05	0.00610022
PRKCA	-2.03082	4.62277	16.617	4.57391e-05	0.00624547
CDCP1	2.84457	3.48948	16.6159	4.57668e-05	0.00624547
EXOC3L4	-2.77635	3.14569	16.6103	4.59019e-05	0.00624547
CAMK2D	-2.14338	3.39432	16.5956	4.62587e-05	0.00624547
ADAM12	-2.86794	-0.00568457	16.584	4.65427e-05	0.00624547
CBLN3	-2.82245	0.992896	16.5568	4.72152e-05	0.00628844
GNB5	-2.03022	5.50933	16.4556	4.98041e-05	0.0065841
MYO3B	-3.43005	-1.32407	16.3425	5.28644e-05	0.00693728
OSBPL10	-2.66335	1.78045	16.2702	5.49207e-05	0.00715452
SLAMF6	-2.6834	2.77439	16.1782	5.7653e-05	0.00745603
THCAT158	-3.30012	1.47748	16.1589	5.82452e-05	0.00746893
DEPTOR	2.09609	5.03805	16.1375	5.89067e-05	0.00746893
BAIAP3	-2.67127	2.83131	16.1238	5.9334e-05	0.00746893
JAM3	-1.74157	4.5503	16.1208	5.94267e-05	0.00746893
ITPR3	-1.7357	5.56917	16.06	6.13678e-05	0.00765896
CALD1	-3.06764	5.94589	15.9919	6.36153e-05	0.00783608
PDGFA	-3.25102	2.58588	15.9847	6.38568e-05	0.00783608
CARNS1	-2.34667	2.44226	15.9774	6.41042e-05	0.00783608
JCHAIN	-2.9058	8.57501	15.8361	6.90704e-05	0.00838571
CD7	-2.25307	3.36551	15.8014	7.03514e-05	0.00846657
ANGPTL1	-3.18787	-1.12008	15.7715	7.14712e-05	0.00846657
COL4A3	-2.99691	1.66155	15.7666	7.16565e-05	0.00846657
FAM150B	-3.15086	0.935492	15.7665	7.16606e-05	0.00846657
LDLRAP1	-1.45385	5.22432	15.7547	7.21084e-05	0.00846657
LINC00565	-3.5004	0.0650884	15.7381	7.27426e-05	0.0084852
FAM46C	-1.5665	6.0476	15.7137	7.36876e-05	0.00853963
CXCR5	-3.91217	1.70774	15.6212	7.7381e-05	0.00889893
F2RL3	-2.84218	3.92485	15.6114	7.77852e-05	0.00889893
BGLAP	-3.09625	-0.793664	15.5427	8.06612e-05	0.00916918
COLCA1	-3.80826	-1.52188	15.5119	8.19864e-05	0.00926084
EDAR	-4.17177	0.375618	15.4316	8.55471e-05	0.00960226
TGFB1I1	-2.35461	4.23562	15.3864	8.76149e-05	0.00977289
SH2D2A	-2.49615	2.23201	15.2364	9.48579e-05	0.0102729
FAXDC2	-2.32899	5.35427	15.2126	9.60586e-05	0.0102729
ANO9	-2.07277	4.05595	15.2125	9.60645e-05	0.0102729
FAM19A1	-4.99934	-2.64768	15.2117	9.61074e-05	0.0102729
PDZK1IP1	-2.79752	2.54517	15.2035	9.65239e-05	0.0102729
PTN	-3.33607	-1.49823	15.188	9.73219e-05	0.0102729
CNR2	-2.49529	0.564076	15.1852	9.74637e-05	0.0102729
GSAP	-1.52216	5.79817	15.1795	9.77565e-05	0.0102729
TNFSF9	-2.54675	0.414656	15.1781	9.78314e-05	0.0102729
INPP5A	-1.54197	4.81601	15.1777	9.78538e-05	0.0102729
SYTL4	-1.91315	4.92764	15.1604	9.87524e-05	0.0103066
MYLK	-2.19306	6.0138	15.1384	9.99096e-05	0.0103668
PCSK2	-4.7024	0.0199372	15.1251	0.000100617	0.0103798
BGN	-3.24395	1.46184	15.0901	0.000102501	0.0105068
CALN1	2.01693	5.27817	15.0779	0.000103166	0.0105068
PLXNA4	-2.38272	2.7932	15.0697	0.000103614	0.0105068
PIK3IP1	-1.95973	5.49576	15.0442	0.00010502	0.0105208
MRVI1	-2.59272	4.92004	15.0416	0.000105165	0.0105208
TSPAN33	-1.988	5.89719	15.0314	0.000105739	0.0105208
ADGB	-3.59565	-2.05509	15.0153	0.000106645	0.0105208
ACVR2A	-2.06207	2.78216	15.0143	0.000106699	0.0105208
ENO2	-1.42964	4.77196	14.997	0.000107684	0.0105596
ADCY6	-2.24677	6.90639	14.9752	0.000108934	0.0106238
TTC16	-3.93339	0.831612	14.9467	0.00011059	0.0107266
PTPRG	-2.88429	0.965251	14.9324	0.00011143	0.0107497
CDHR1	-3.04482	0.951093	14.8786	0.000114655	0.0110013
SPOCK3	3.37371	1.48526	14.8499	0.000116413	0.0110837
CD3E	-3.37326	4.16932	14.8444	0.000116755	0.0110837
WNT16	-3.00353	-1.19598	14.7417	0.000123287	0.0116274
LINC00472	-3.14157	0.35538	14.7194	0.000124755	0.0116274
BDNF	-3.10405	2.45107	14.7117	0.000125264	0.0116274
COL5A2	-2.69914	1.84192	14.7098	0.000125395	0.0116274
PLIN1	-2.80975	-0.291788	14.7046	0.000125741	0.0116274
LOC101927572	6.53601	-0.946849	14.6886	0.000126808	0.0116657
SLC10A5	4.76855	0.0889117	14.6788	0.00012747	0.0116664
VIL1	-3.04156	0.694619	14.6427	0.000129937	0.0118316
CNTNAP2	-3.15482	0.465321	14.6165	0.000131754	0.0118791
DMTN	-2.2283	5.91836	14.616	0.00013179	0.0118791
UBASH3B	-1.45552	6.17897	14.586	0.000133908	0.0119151
IL24	-3.08848	-0.454185	14.5818	0.000134205	0.0119151
GPRIN3	-2.4375	3.4601	14.5778	0.000134488	0.0119151
CLEC1B	-2.58533	4.61883	14.5726	0.000134861	0.0119151
ARHGAP18	-1.93713	5.76261	14.5527	0.000136297	0.0119657
C1orf116	-2.9967	1.47228	14.5461	0.000136774	0.0119657
STAC	2.81733	3.09084	14.5133	0.000139176	0.0120783
LLGL2	-1.72519	3.9854	14.51	0.000139414	0.0120783
MYO1C	-1.82243	4.07037	14.4774	0.000141849	0.0122298
GP1BA	-2.48311	6.34368	14.4397	0.000144719	0.0123686
P2RY10	-2.63719	2.4401	14.4381	0.000144844	0.0123686
CACNA1I	-3.75998	2.25046	14.4	0.000147803	0.0125611
LTBP1	-2.127	7.55858	14.3845	0.000149025	0.012605
SULT4A1	-3.39387	-1.46512	14.3527	0.000151562	0.0126875
PLXNB3	-3.22423	5.12097	14.3449	0.000152189	0.0126875
MEX3B	2.18333	4.64174	14.3441	0.000152256	0.0126875
CACNB1	-2.02198	3.31584	14.3368	0.000152845	0.0126875
WDR86	-2.68276	0.489935	14.3258	0.000153742	0.0126982
SCG5	6.55352	-0.998915	14.3167	0.000154486	0.0126982
GNG11	-2.87359	5.52201	14.3092	0.000155107	0.0126982
CHN1	-2.1994	0.0031405	14.2798	0.000157546	0.0127335
SRC	-2.31687	6.19562	14.2756	0.0001579	0.0127335
NCKAP1	-2.58001	4.39389	14.2747	0.00015797	0.0127335
LIMS1	-1.86491	7.91951	14.2697	0.000158392	0.0127335
RGMB	-2.67393	0.336033	14.2602	0.0001592	0.012741
SAMD14	-2.88449	4.5049	14.2334	0.000161477	0.0128135
GYS2	-2.96579	0.354049	14.2327	0.000161542	0.0128135
MOB3C	-2.06743	5.14732	14.2138	0.000163173	0.0128856
BOC	-3.29812	-0.525285	14.1715	0.000166881	0.0131204
ADAMTS9	-2.69017	1.05308	14.1416	0.000169552	0.0132358
PF4	-3.02373	8.18873	14.1313	0.000170486	0.0132358
SCML4	-2.51557	3.1158	14.1255	0.000171013	0.0132358
DOK6	-3.27552	1.9275	14.1181	0.00017168	0.0132358
ARID5B	-1.67555	4.51493	14.114	0.000172057	0.0132358
SLC24A3	-2.12217	4.7619	14.0529	0.000177741	0.0136144
PROM1	2.14172	6.60269	14.0221	0.000180674	0.0137799
LGALSL	-2.64056	6.34929	14.0121	0.000181635	0.0137942
CCDC64	-2.94319	2.21594	13.9946	0.000183339	0.0138647
LINC00299	-3.26789	-0.758627	13.9864	0.000184134	0.013866
ZNF521	2.47171	5.24749	13.9557	0.000187173	0.0140356
NXPH4	-3.54351	-2.05514	13.9198	0.000190783	0.0142465
CBX7	-1.73503	4.56581	13.868	0.000196113	0.0145099
ISLR	-3.22667	0.656921	13.8652	0.000196403	0.0145099
ACRBP	-2.1081	4.7418	13.8619	0.00019675	0.0145099
LY6G6D	-2.93571	2.07274	13.8323	0.000199873	0.0146796
FREM1	3.44172	5.00303	13.823	0.000200862	0.0146917
LINC00890	4.52051	-0.101258	13.7907	0.000204341	0.0148251
ARHGAP6	-2.31235	4.92171	13.7876	0.000204685	0.0148251
PTGDS	-3.05308	2.27054	13.7831	0.000205177	0.0148251
PIGR	-4.42691	-2.20822	13.7608	0.00020762	0.0149411
PDE3A	-2.45786	4.7562	13.7162	0.000212611	0.0151857
CAPN8	-3.85275	-2.32473	13.7152	0.000212721	0.0151857
LOXL3	-1.73287	4.99145	13.7028	0.000214138	0.015226
GALNT9	-3.50759	-1.77118	13.6821	0.000216505	0.0153332
TSPAN15	-2.66837	3.14871	13.6666	0.000218298	0.0153573
FLT3	1.92992	7.22085	13.6643	0.000218566	0.0153573
ZPBP2	-5.17447	-2.87321	13.651	0.000220121	0.0154059
PTGIR	-2.2594	4.24592	13.6194	0.000223863	0.0156066
FAM87A	-4.38156	-1.87189	13.5933	0.000226997	0.0157635
NRGN	-2.55449	7.31985	13.5439	0.000233044	0.0161207
KIR3DL2	-3.43485	-0.166891	13.5326	0.00023445	0.0161553
C9orf172	-2.22472	0.748147	13.5158	0.000236561	0.0162381
PCED1B	-2.56473	2.25903	13.492	0.000239583	0.0163825
GPRASP1	-1.78613	3.84431	13.4534	0.000244567	0.0166595
TSPAN32	-1.2329	6.79534	13.4288	0.000247785	0.0167867
NR3C2	-2.44477	1.63083	13.4248	0.000248316	0.0167867
PTGDR	-2.83064	2.382	13.3828	0.000253944	0.0169889
GATA3	-2.3362	2.07336	13.3775	0.000254666	0.0169889
LOC285766	-3.11606	0.058589	13.3747	0.000255042	0.0169889
LURAP1	3.72821	0.776351	13.3742	0.000255115	0.0169889
SBDS	-1.31239	5.90263	13.3282	0.000261446	0.0172651
POU6F1	-1.93295	2.52004	13.3252	0.000261867	0.0172651
C15orf26	-3.26585	1.40948	13.323	0.000262164	0.0172651
GSTA1	-4.76477	-1.84567	13.2823	0.000267926	0.0175797
DEGS2	4.79658	0.787607	13.2626	0.000270752	0.0177
HOXC4	-2.81294	-1.54451	13.2418	0.000273773	0.0177714
LPAL2	-3.10513	-0.705686	13.2414	0.000273835	0.0177714
MYL9	-2.94884	6.11755	13.2291	0.000275636	0.0177749
DDX11L5	-4.18498	-2.22126	13.2274	0.000275881	0.0177749
JAKMIP1	-3.2691	0.47979	13.1912	0.000281267	0.0180567
TUBA8	-2.17908	5.12927	13.1685	0.000284688	0.0182108
TMEM184A	-1.9944	1.45883	13.1614	0.000285769	0.0182147
KIR3DX1	-3.16912	-0.636493	13.1378	0.0002894	0.0183463
SDPR	-2.54196	7.52588	13.1346	0.000289889	0.0183463
GAS2L1	-2.00705	5.28145	13.1273	0.00029103	0.0183534
RGS6	-3.02234	3.10823	13.095	0.000296092	0.0186069
MEX3A	2.63781	3.36522	13.0772	0.000298914	0.0187183
STEAP1B	-3.15986	-1.93541	13.0662	0.000300665	0.0187306
CD69	-1.96126	7.02486	13.0505	0.000303196	0.0187306
RADIL	-2.34896	2.143	13.0472	0.000303745	0.0187306
OMD	-4.02621	-1.36606	13.0434	0.000304351	0.0187306
LRRIQ3	4.47131	-0.67159	13.0434	0.000304358	0.0187306
ELOVL7	-2.34418	4.77823	13.0261	0.000307187	0.0188397
MMRN1	-2.08593	7.76051	13.0126	0.000309409	0.0188781
KLF12	-1.64518	5.019	13.0094	0.000309929	0.0188781
LINC01122	2.98218	2.00238	12.9844	0.000314102	0.0190188
ATHL1	-1.77468	7.06895	12.9775	0.000315264	0.0190188
DGCR9	-2.55167	-0.147109	12.9707	0.000316409	0.0190188
RNF165	-2.78753	-0.657104	12.9701	0.0003165	0.0190188
PIK3CD-AS2	3.56787	0.373378	12.9572	0.0003187	0.0190867
WFDC1	-1.97678	3.21353	12.939	0.000321804	0.0192081
THEM5	-2.74214	-0.839829	12.9234	0.000324495	0.0193042
MYOM1	-2.15077	3.58495	12.8648	0.000334825	0.0198526
ESAM	-2.47537	5.242	12.8367	0.000339882	0.0200857
RASGRP1	-2.13557	3.99316	12.8137	0.000344084	0.0202669
BTLA	-2.5486	1.6857	12.8006	0.000346517	0.0202951
CLDN3	-3.30406	1.40654	12.7988	0.000346838	0.0202951
TTC39A	-2.54595	-0.46313	12.7896	0.000348544	0.0203283
PROS1	-2.4767	5.20452	12.777	0.0003509	0.0203991
HPGDS	2.55371	3.78763	12.7645	0.000353257	0.0204694
HOXB9	-4.38957	-2.33384	12.7399	0.000357935	0.0206734
PRSS50	-3.55084	1.83135	12.733	0.000359266	0.0206833
CD9	-2.15503	6.67007	12.7208	0.000361611	0.0207336
TPM2	-1.65426	6.08692	12.7164	0.000362463	0.0207336
RNF150	3.45285	1.34888	12.6826	0.00036907	0.0210143
DOCK9	-2.32285	3.25801	12.6793	0.000369726	0.0210143
CTGF	-2.14626	3.36778	12.6624	0.000373074	0.0211161
RAB30	-2.1853	4.04717	12.6584	0.000373882	0.0211161
PDK4	-2.51202	4.39687	12.6323	0.000379144	0.0212796
TBXA2R	-2.39286	2.9849	12.6322	0.000379162	0.0212796
CPZ	-2.96527	-1.11019	12.5897	0.000387876	0.0217004
ZFPM2	-2.4901	1.68593	12.5767	0.000390588	0.0217838
HTR1F	2.3404	3.76692	12.5702	0.000391951	0.0217918
DNAH2	5.16488	1.4182	12.5631	0.000393437	0.0218064
ABHD11-AS1	-2.90076	0.439901	12.5254	0.000401465	0.0221825
ISM1	-2.52969	-0.871321	12.5184	0.000402966	0.0221967
COL6A3	-3.10982	5.57971	12.4884	0.00040949	0.0224545
IGSF9B	-2.73096	0.920116	12.4853	0.000410163	0.0224545
CCDC65	-2.14127	0.615794	12.4642	0.000414828	0.0225668
CFAP46	4.91408	0.0514984	12.4597	0.000415834	0.0225668
HTR2A	-2.9129	1.54207	12.4589	0.000416007	0.0225668
LOC101928134	6.97761	-0.578928	12.4471	0.000418651	0.0226037
LOC100505530	-4.51612	-1.69784	12.4445	0.00041922	0.0226037
ZFYVE28	-2.17817	2.33814	12.4297	0.00042256	0.0227152
CYP4F35P	-2.10841	0.74583	12.4212	0.000424487	0.0227502
ANGPTL4	-2.77373	1.29545	12.4155	0.000425788	0.0227516
WDR44	-1.44267	4.98866	12.4055	0.000428076	0.0228056
EXOC3L2	-2.54843	3.54666	12.3913	0.000431337	0.0228657
CHADL	-2.37003	1.13804	12.3841	0.000433008	0.0228657
HIST1H2AM	4.49542	-0.343547	12.3839	0.000433049	0.0228657
TRAT1	-3.16504	1.64376	12.358	0.000439098	0.0231168
EFHC2	-1.61664	4.23075	12.3432	0.00044259	0.0231319
KCNH8	-2.65233	0.998843	12.3412	0.000443071	0.0231319
COL3A1	-3.26046	2.38769	12.3403	0.000443274	0.0231319
DNM3OS	-2.6671	-0.353504	12.3312	0.000445451	0.0231777
SEC14L5	-3.29315	3.35985	12.3226	0.000447499	0.0232166
TMCC2	-2.26507	3.91381	12.3158	0.000449136	0.023234
LIPH	-3.14719	0.883077	12.302	0.000452473	0.023339
SLC13A5	-4.3276	-2.3266	12.2756	0.00045893	0.023496
HRK	-3.04743	-1.09837	12.2733	0.000459476	0.023496
ITGA10	-1.92703	0.728791	12.2662	0.000461233	0.023496
WT1	6.29879	-0.75887	12.2602	0.000462722	0.023496
PPBP	-3.38295	9.95501	12.26	0.00046276	0.023496
KLRG2	5.17412	0.123013	12.2574	0.000463417	0.023496
PARVB	-1.48508	6.97954	12.2468	0.000466055	0.0235297
FHL1	-1.50783	6.86405	12.2442	0.000466719	0.0235297
TNN	-3.85756	-1.44736	12.2136	0.000474431	0.0237777
SAPCD2	1.60437	4.91019	12.2102	0.00047528	0.0237777
BEST3	-3.08545	0.850143	12.2088	0.000475634	0.0237777
LOC643733	-2.85898	0.099651	12.1673	0.000486335	0.0242447
KLRB1	-2.81769	2.2849	12.1562	0.000489237	0.0242561
KCNQ4	-2.23212	2.50447	12.1561	0.000489281	0.0242561
HPSE	-2.21384	5.47806	12.1273	0.000496895	0.0245653
FERMT1	3.62561	3.2909	12.0951	0.000505555	0.0249244
FCRL2	-3.2468	3.33574	12.08	0.000509666	0.0250579
DNM1	-1.94264	4.03462	12.0608	0.000514945	0.0252155
PATL2	-1.95729	3.23748	12.058	0.000515698	0.0252155
HS1BP3-IT1	-3.77482	-2.4138	12.0486	0.000518305	0.0252738
MDGA2	7.34455	-0.0776975	12.0026	0.000531265	0.0258351
TF	-2.81131	3.92167	11.9875	0.000535592	0.0259748
TYMS	1.4955	6.05302	11.9687	0.000541007	0.0261663
EHD3	-2.01118	5.38759	11.9533	0.000545495	0.026312
CNST	-1.49358	6.64124	11.9214	0.000554939	0.0266329
SLC27A2	1.61082	5.0436	11.9143	0.000557035	0.0266329
TCEA3	-2.62404	0.538532	11.9083	0.000558842	0.0266329
PDE5A	-2.5644	5.53476	11.9016	0.000560872	0.0266329
RUNDC3A-AS1	-2.55482	-1.31826	11.9011	0.000561012	0.0266329
SPON2	-1.68342	3.36534	11.9008	0.0005611	0.0266329
CMTM5	-2.44309	5.34024	11.8703	0.000570349	0.0270001
CDC14B	-1.91507	4.58261	11.8576	0.000574251	0.0271128
RBPMS2	-2.10729	4.43639	11.8444	0.000578364	0.027235
LRRC32	-2.48362	3.01773	11.8363	0.000580871	0.0272811
GP6	-2.50123	4.9276	11.8119	0.000588518	0.0275439
ARHGEF3	-1.4073	5.57599	11.8059	0.000590442	0.0275439
KCNE4	-3.66844	-1.06916	11.7997	0.000592414	0.0275439
KAZN	-1.86599	4.08207	11.7978	0.000592997	0.0275439
CHGB	6.10195	-1.35683	11.7941	0.000594185	0.0275439
PRSS27	-2.06472	1.43287	11.7848	0.000597169	0.0276106
PRKXP1	-2.05554	3.644	11.7793	0.000598934	0.0276206
LTK	-1.67169	4.5142	11.751	0.00060811	0.0279715
P2RX5	-1.796	3.59957	11.7314	0.00061453	0.0281942
CEMIP	-1.94218	1.96917	11.72	0.000618325	0.0282313
ETS1	-1.87295	6.88652	11.7184	0.000618845	0.0282313
ILK	-1.59494	7.50174	11.7108	0.000621384	0.0282313
PRKCH	-1.53548	5.48578	11.7064	0.000622844	0.0282313
TTC39B	-1.85127	3.29707	11.7052	0.000623249	0.0282313
SPARC	-1.91022	7.3676	11.6946	0.00062682	0.0282887
PTPRF	-1.86046	2.5576	11.692	0.000627688	0.0282887
TGFB2	-3.0278	-0.559042	11.6806	0.000631542	0.0283908
LOC101927746	6.66876	-0.635433	11.6739	0.000633843	0.0284226
LSR	-1.83657	3.05207	11.6611	0.000638217	0.0284559
MORC1	-2.92669	1.13215	11.659	0.00063892	0.0284559
SYTL2	-2.25725	1.96931	11.6577	0.000639369	0.0284559
NKAIN4	-4.66671	-2.66661	11.6518	0.000641417	0.028476
MAP7	1.86085	6.03474	11.6072	0.000656958	0.0290936
GZMB	-2.72777	2.6103	11.5804	0.000666506	0.0294434
CCDC85A	-3.34328	-2.0383	11.5743	0.000668679	0.0294664
SKA3	1.55751	4.92386	11.5679	0.000670985	0.0294953
PCP2	-1.94083	1.83745	11.5341	0.000683299	0.0299049
TUSC5	-3.62749	-2.39477	11.5332	0.000683654	0.0299049
TREML1	-2.86781	5.66401	11.527	0.000685922	0.0299307
CARD11	-1.65433	5.22989	11.5075	0.000693147	0.0301215
SP2-AS1	2.75903	0.987484	11.5061	0.00069367	0.0301215
KLRC2	-4.08128	-0.413373	11.4799	0.000703535	0.0304555
PRSS35	-5.1246	-1.32719	11.4766	0.000704776	0.0304555
RAB6B	-2.09426	4.75197	11.4694	0.000707516	0.0305001
LINC00861	-3.53819	2.6002	11.4641	0.000709549	0.030514
PCAT18	4.55893	1.17395	11.4527	0.000713912	0.0306279
KALRN	-2.4186	4.22493	11.4278	0.000723532	0.0309661
FNDC1	-3.41082	-0.306673	11.4039	0.000732918	0.0312928
SLC5A4	-3.82677	-1.82812	11.3892	0.000738743	0.0314034
SAMD3	-2.90551	1.89296	11.3884	0.000739028	0.0314034
DOK7	-2.69322	-1.21824	11.3726	0.000745357	0.0315775
EWSAT1	-2.86682	-1.01595	11.367	0.000747606	0.0315775
PDGFB	-2.97919	3.85875	11.3629	0.000749269	0.0315775
PROSER2	-1.67835	4.82254	11.3606	0.000750201	0.0315775
HOXA6	3.1175	0.939094	11.3439	0.000756954	0.0317867
ADGRL3	-3.02975	-2.21118	11.3377	0.000759473	0.0318177
TMPRSS3	-2.83663	-0.97203	11.3279	0.000763522	0.0318419
CYTL1	2.18016	5.60311	11.3276	0.000763621	0.0318419
APCDD1	-2.45793	0.47091	11.3172	0.00076794	0.0319474
SLC37A1	-1.31962	6.22357	11.3114	0.000770337	0.0319726
LINC01529	5.02631	-0.249265	11.3054	0.00077282	0.0320012
MFAP3L	-2.39157	4.8424	11.2925	0.000778204	0.0320802
PZP	-3.29547	-0.622492	11.2922	0.000778323	0.0320802
KCNT1	-2.68392	-1.40548	11.2864	0.000780767	0.0321068
FCRL6	-3.35221	1.99212	11.281	0.000783043	0.0321264
PEAR1	-2.04857	5.7401	11.2668	0.000789058	0.0322989
SLC38A11	-4.28738	-1.43475	11.2575	0.000793017	0.0323867
WNT11	-2.5122	2.29276	11.2509	0.000795827	0.0324103
IFIT1B	-2.80017	0.801392	11.2477	0.000797228	0.0324103
SATB2	-2.18233	0.762649	11.2383	0.000801264	0.0324923
UNC45B	-3.35933	-2.01035	11.2346	0.000802885	0.0324923
PCSK6	-3.01561	4.11467	11.2269	0.00080619	0.0325522
PTCRA	-2.97445	3.27436	11.2086	0.000814189	0.032801
SOX8	-2.49639	-1.0144	11.2021	0.000817053	0.0328422
RRAS2	-1.89078	1.92344	11.1933	0.000820936	0.0329242
TUNAR	-4.17529	-1.95853	11.1661	0.000833049	0.0333041
ASB9	2.203	3.37176	11.1604	0.000835638	0.0333041
HEXIM1	-1.26377	6.39432	11.1595	0.000836008	0.0333041
KLRC1	-3.57513	-0.222763	11.1512	0.000839788	0.0333225
CDH9	3.46631	1.45977	11.1502	0.000840205	0.0333225
MIR4701	-2.682	-1.55049	11.1341	0.000847572	0.0335016
ZBED2	-3.52125	-1.9144	11.1296	0.000849601	0.0335016
CPA3	2.51061	7.26475	11.1271	0.000850771	0.0335016
KIT	2.2773	7.23205	11.1167	0.000855535	0.0335016
CTLA4	-3.82961	1.05639	11.1163	0.00085573	0.0335016
MFGE8	1.42612	5.22974	11.1117	0.000857826	0.0335016
NTPCR	1.72217	4.25831	11.1117	0.000857859	0.0335016
DPY19L2P3	4.14208	-0.6791	11.104	0.000861395	0.0335662
COL24A1	-1.70511	5.47506	11.0943	0.000865919	0.033604
RGS10	-1.5492	5.93916	11.0918	0.000867091	0.033604
DISC1FP1	6.2005	-1.12545	11.0899	0.000868013	0.033604
SAMD13	2.59755	2.48397	11.0805	0.000872413	0.0337012
FHOD1	-1.31871	6.72791	11.0532	0.000885353	0.0341272
LRRC71	-3.0968	-1.10157	11.0478	0.000887905	0.0341294
BTBD18	6.02775	-1.15751	11.0451	0.000889235	0.0341294
DSCC1	1.73098	4.52792	11.0267	0.000898066	0.0343944
TNFRSF18	-2.12842	1.47788	11.0117	0.000905363	0.0345472
KLRC3	-3.09453	-0.186282	11.0106	0.000905927	0.0345472
CLU	-1.94537	7.35689	10.9934	0.00091439	0.0347956
PTPRS	-1.63415	4.1656	10.9584	0.000931821	0.0353834
HIST1H4E	6.39692	-0.924658	10.9312	0.000945587	0.0357657
C6orf25	-2.22632	6.62896	10.9306	0.000945896	0.0357657
CCR6	-2.82729	0.7184	10.9235	0.000949503	0.0357967
FAM86C2P	2.7883	1.10594	10.9211	0.000950726	0.0357967
COL4A4	-2.449	1.48813	10.9167	0.000953018	0.0358074
RGS18	-1.93285	6.88969	10.8982	0.00096257	0.0360626
TNNC2	-2.59114	0.411354	10.8957	0.000963853	0.0360626
CNNM1	2.58583	2.22788	10.8752	0.000974599	0.0363884
LINC00634	6.10697	-1.19776	10.8544	0.0009856	0.0366202
SH3BGRL2	-2.22917	5.44608	10.8541	0.000985772	0.0366202
FAM65C	-1.66118	6.60086	10.8471	0.000989529	0.0366202
CTDSPL	-1.39293	6.32399	10.8446	0.000990838	0.0366202
BCL11B	-3.57972	3.31424	10.8442	0.000991065	0.0366202
PIK3C2B	-1.64859	4.49943	10.8168	0.00100583	0.0370888
BTN3A1	-1.30518	5.96595	10.7989	0.00101558	0.0373714
CD226	-2.83514	4.9357	10.7834	0.00102414	0.0375387
SLC5A11	-2.7361	-1.72984	10.7831	0.00102434	0.0375387
ARMC3	-3.3661	-0.164731	10.7678	0.00103282	0.0377537
STRIP2	-1.64948	4.09151	10.7649	0.00103443	0.0377537
MIR3960	-2.97074	-1.38539	10.7537	0.0010407	0.0379049
STAT4	-1.67559	3.69715	10.7406	0.00104811	0.0380395
TMEM97	1.70829	4.73653	10.7396	0.00104866	0.0380395
CA13	-1.89419	2.25574	10.7174	0.00106134	0.0384214
PREX2	2.73423	2.74114	10.7021	0.00107014	0.0385966
RASGRP3	-1.4258	4.9311	10.7015	0.00107051	0.0385966
FAAHP1	-2.83017	-1.03816	10.6932	0.00107531	0.0386917
TMEM40	-2.93966	3.92466	10.686	0.00107951	0.0387529
LINC00298	-4.25593	-2.50312	10.6828	0.00108136	0.0387529
SIAE	-1.49807	4.66355	10.6738	0.00108665	0.0388647
CCL5	-2.59587	5.64552	10.6655	0.00109152	0.0389143
GATA2	2.03757	6.69771	10.664	0.0010924	0.0389143
SELP	-2.18669	6.34118	10.6444	0.00110405	0.0392508
SEPT4	-2.41453	2.19753	10.6394	0.00110706	0.0392579
SOX13	-2.68389	0.53682	10.6352	0.00110957	0.0392579
NKX2-3	3.77545	0.860843	10.631	0.00111208	0.0392579
NUAK1	-2.85564	0.679928	10.6294	0.00111304	0.0392579
IFITM5	-3.07737	-2.03463	10.6233	0.00111673	0.0393103
C1orf186	2.10598	3.94752	10.6065	0.00112688	0.0395216
FRMD4B	-1.61094	5.99195	10.6061	0.00112716	0.0395216
PPP1R16B	-1.44108	5.28178	10.5958	0.00113347	0.0396647
KLRD1	-3.21579	1.76741	10.5872	0.00113872	0.0397379
ITGA6	-1.56844	6.90689	10.5851	0.00114003	0.0397379
NPR3	1.84483	7.23502	10.5815	0.00114224	0.0397379
LHX6	3.11614	0.469304	10.5703	0.00114917	0.0399014
LY6G6F	-2.6543	5.00233	10.5451	0.00116497	0.0403714
COL6A1	-2.02329	3.11968	10.5341	0.00117195	0.040494
RAB3B	-2.7644	-0.671663	10.5308	0.00117404	0.040494
CAMK2N1	-3.38864	-1.12964	10.5287	0.00117532	0.040494
SLFN14	-2.48484	2.37193	10.5235	0.00117867	0.0405312
C15orf59	-3.56196	-1.57925	10.5086	0.00118819	0.04078
TRAF1	-1.90672	4.36141	10.5018	0.00119257	0.0408518
CACNA2D1	-3.23585	-1.25084	10.4891	0.00120083	0.0410559
MCF2L	-2.29966	3.53432	10.48	0.00120673	0.0411787
LOC101928150	-2.39423	0.838485	10.4672	0.00121515	0.0412843
CD5	-2.93928	3.26748	10.4667	0.00121548	0.0412843
GRB14	-2.83862	-0.0661654	10.4647	0.00121676	0.0412843
PMEPA1	-1.81706	1.95092	10.4387	0.00123403	0.0417908
HOXB-AS3	3.49956	0.370756	10.4216	0.00124551	0.0420997
TMPRSS13	-1.89505	0.551447	10.4125	0.00125164	0.0421326
TCF7	-3.11403	4.21343	10.4121	0.00125191	0.0421326
GPM6A	-2.46291	0.796882	10.4093	0.00125381	0.0421326
ZBTB32	-2.09211	0.842064	10.404	0.0012574	0.0421326
LINC01599	-2.77624	-0.878976	10.4007	0.00125968	0.0421326
F13A1	-2.46291	8.06749	10.3993	0.00126065	0.0421326
ICOS	-3.65973	1.57359	10.3862	0.00126958	0.0423517
LEFTY1	-3.04524	1.03557	10.3813	0.00127301	0.0423869
FRMPD3	-3.71634	-0.953989	10.3608	0.00128722	0.0427804
FAM129C	-2.31878	5.66705	10.3468	0.001297	0.0429759
TIGD3	2.4503	1.20223	10.3419	0.00130041	0.0429759
TNNI3	-3.11875	0.363953	10.3409	0.00130112	0.0429759
CDO1	-2.9866	-0.791346	10.3358	0.00130474	0.0429759
EMID1	1.99674	6.27345	10.3352	0.00130514	0.0429759
ENTPD8	-2.28392	0.467728	10.3132	0.00132082	0.0433588
KIAA1462	-2.07562	2.86025	10.3121	0.00132163	0.0433588
CDC42BPB	-1.66682	5.41931	10.3001	0.00133024	0.043561
LOC100652768	-1.73774	1.77535	10.2844	0.0013416	0.0438526
ITIH5	-2.87529	1.2147	10.2764	0.0013474	0.0438909
PKHD1L1	-2.81636	5.31008	10.273	0.00134991	0.0438909
HIST1H2BO	6.12852	-0.732397	10.2727	0.00135015	0.0438909
SRMS	-2.49855	-1.20151	10.2515	0.00136575	0.0443174
EFNB2	-2.12282	3.76851	10.2442	0.00137118	0.0444126
RASGRF2	-2.77572	1.85661	10.2332	0.00137937	0.0445176
CACNA1H	-2.55353	0.0919338	10.2331	0.0013794	0.0445176
CABP5	-3.37344	0.760796	10.2229	0.00138707	0.0446518
LINC00900	6.12891	-1.2948	10.2209	0.00138857	0.0446518
TMEM63B	-1.33085	4.1782	10.2156	0.00139261	0.0447012
GUSBP2	4.07153	0.0124638	10.2072	0.00139893	0.0447655
CD28	-3.38437	3.13751	10.2063	0.00139963	0.0447655
ZAP70	-2.44215	5.39609	10.2015	0.00140323	0.0448004
CPNE5	-2.15916	3.50655	10.1978	0.00140607	0.0448111
FXYD7	-2.28742	-0.630333	10.1916	0.00141081	0.044882
SLC25A29	1.58796	6.76999	10.1852	0.00141571	0.0448931
ACOT7	1.68677	5.06303	10.1846	0.0014162	0.0448931
DUSP5	-1.72894	4.81194	10.1691	0.00142817	0.0451729
MYEOV	-2.59179	0.895647	10.1658	0.00143066	0.0451729
C20orf195	-2.25111	-0.869055	10.1633	0.00143261	0.0451729
RUNX3	-1.24484	6.75311	10.1591	0.00143592	0.0451972
FBXO32	-1.69603	2.80257	10.1485	0.00144422	0.0453784
CD83	-1.75399	5.55306	10.1263	0.00146165	0.0458292
GP5	-2.78831	5.28801	10.1238	0.0014637	0.0458292
C3orf52	-1.99699	2.12288	10.1138	0.00147165	0.0459974
PLEKHA1	-1.73536	3.5283	10.0967	0.00148533	0.0463439
PTCH1	-2.52454	1.73719	10.0873	0.00149293	0.0464997
HES1	-2.27579	2.47746	10.0802	0.00149868	0.0465974
SLC17A3	-3.22016	-2.16019	10.071	0.00150618	0.0467493
CRIP2	-1.95999	1.90693	10.0598	0.00151536	0.0469526
TTLL10	3.46732	-0.459553	10.0552	0.00151916	0.0469887
KCNJ9	-3.77933	-2.55907	10.0446	0.00152796	0.0471791
C11orf96	-2.26042	2.64013	10.026	0.00154346	0.0475754
SGCB	-1.82221	1.57727	10.0088	0.0015579	0.0479377
ELOVL4	-3.17916	-1.85738	9.99285	0.00157149	0.0482727
IGF2BP3	-1.75601	3.3238	9.9771	0.00158499	0.048554
CD2	-2.56572	2.82443	9.97472	0.00158704	0.048554
PRR5L	-1.51097	3.71954	9.97266	0.00158881	0.048554
FBLN7	-3.71317	-1.54658	9.95853	0.00160106	0.0488447
ZC3H12D	-1.92427	3.70571	9.94433	0.00161345	0.0491387
TCEAL7	5.96067	-1.36289	9.93391	0.00162261	0.0493188
ZNF229	2.14606	2.68575	9.93133	0.00162489	0.0493188
GZMM	-2.7076	1.92626	9.9258	0.00162978	0.0493748
LOC101928100	-2.8219	0.100102	9.92299	0.00163227	0.0493748
MAP1B	-2.46201	-0.224484	9.91734	0.00163729	0.0494022
PVALB	-2.70861	-0.438722	9.91574	0.00163871	0.0494022
SP7	-2.48991	-0.140292	9.91165	0.00164236	0.0494287
MAOB	-2.88324	2.90417	9.90115	0.00165175	0.0496276
KCNK6	-1.68743	4.01716	9.89578	0.00165658	0.0496891
UGT8	-3.15353	-2.12396	9.88994	0.00166185	0.0497633
EGF	-2.65184	4.15223	9.88219	0.00166886	0.0498206
NLRP1	-1.4956	6.55743	9.88166	0.00166934	0.0498206

## Sheet: 2. CD34+_severity
Bone Marrow-Derived CD34+ cells from 'Sle.Female Patients: Severe SLE vs Moderate SLE' (|FC|1.5, FDR<0.05)
Gene name	logFC	logCPM	LR	PValue	FDR
ADAMTS2	5.02631	3.57017	51.9007	5.83807e-13	9.93114e-09
NPY	-9.31662	0.454735	44.4419	2.62024e-11	1.58052e-07
RAG1	-5.58542	5.5124	44.1451	3.04914e-11	1.58052e-07
LINC01013	-9.50197	2.60421	43.7577	3.71647e-11	1.58052e-07
VPREB1	-7.40375	5.94368	41.6813	1.07432e-10	3.65505e-07
LCN6	-8.59191	4.11537	40.2902	2.18908e-10	6.20641e-07
VPREB3	-7.42079	5.10844	35.677	2.32896e-09	5.40245e-06
ARPP21	-6.5751	3.32207	35.2953	2.8332e-09	5.40245e-06
RAG2	-7.62319	2.75739	35.2781	2.85827e-09	5.40245e-06
DNTT	-5.46017	8.34739	34.8325	3.59317e-09	6.11234e-06
LCN10	-6.37393	4.56772	34.2813	4.7695e-09	7.37582e-06
AIRE	-6.6522	2.3306	33.3025	7.88828e-09	1.11823e-05
EBF1	-5.18081	4.34404	33.0207	9.11839e-09	1.19318e-05
PAX5	-4.24839	4.20212	31.7128	1.78743e-08	2.17186e-05
LOC100128593	-7.49311	2.10238	31.3107	2.19859e-08	2.49335e-05
CD79B	-4.84122	7.29317	30.3999	3.51543e-08	3.73756e-05
DTX1	-5.54188	3.23297	29.462	5.70242e-08	5.70611e-05
CXCL2	3.98491	5.36904	29.3218	6.13026e-08	5.79344e-05
TCL1B	-8.56387	-0.236824	28.8513	7.81551e-08	6.99735e-05
CAPSL	-7.01749	-1.53805	27.4146	1.64189e-07	0.000139651
HMHB1	-7.95604	1.04301	27.3072	1.73565e-07	0.000140596
MIR5195	-6.01053	0.654795	26.9847	2.05067e-07	0.000158564
LY6H	-6.65253	0.698001	26.5593	2.55575e-07	0.000189025
BACH2	-2.92296	3.99629	26.2256	3.03767e-07	0.000212406
LRFN2	-6.23985	0.729092	26.173	3.12159e-07	0.000212406
MIR6722	-7.46403	0.590843	25.9307	3.53902e-07	0.000231547
ZAP70	-2.7007	4.8018	25.3154	4.86809e-07	0.000306708
CD19	-3.80829	3.62537	25.183	5.214e-07	0.000316769
CCR7	-3.57727	2.33606	24.8176	6.30191e-07	0.000369661
BLACE	-6.06213	0.710581	24.7116	6.65806e-07	0.000377534
LOC101927740	-5.47666	0.662557	24.1763	8.79095e-07	0.000482396
CD22	-3.19419	4.54983	24.0035	9.61615e-07	0.000511189
IL7R	-3.25722	4.50777	23.3676	1.33812e-06	0.000689779
APOD	4.8814	0.6691	22.8826	1.72202e-06	0.00083343
NR4A1	2.27656	5.2285	22.876	1.72796e-06	0.00083343
PRKG1	3.34749	3.62506	22.7514	1.84369e-06	0.00083343
TCL6	-5.37913	-0.242648	22.7402	1.85447e-06	0.00083343
NPTX1	-6.25532	-2.07751	22.7327	1.86176e-06	0.00083343
ANTXRLP1	-5.01384	-0.214604	22.2934	2.34009e-06	0.0010207
CXCL8	4.283	7.82719	22.1922	2.46668e-06	0.00104902
LINC01507	-6.36567	-0.940575	22.0819	2.61262e-06	0.00108398
SPARCL1	4.17512	2.87046	21.1802	4.18072e-06	0.0016842
HIF3A	4.3553	0.642452	21.1454	4.25729e-06	0.0016842
CCL20	6.16124	0.756066	21.025	4.53318e-06	0.00175259
GPR176	-4.37042	2.01175	20.5577	5.78609e-06	0.00218244
MMP19	4.72327	3.11558	20.5198	5.90161e-06	0.00218244
DBH-AS1	-4.37934	2.08686	20.3428	6.47362e-06	0.00234304
GYLTL1B	-4.12776	1.73648	20.069	7.46978e-06	0.00264726
CXCL3	3.172	3.70794	19.9887	7.79007e-06	0.00270443
CD79A	-3.09888	5.67258	19.3292	1.10011e-05	0.00374278
PTGS2	3.62658	6.0311	18.8487	1.41507e-05	0.00471997
IRX1	-4.09429	1.37126	18.6913	1.5368e-05	0.00502739
LOC100996286	-5.10434	-0.322392	18.5405	1.66331e-05	0.0053386
LYVE1	3.99784	3.01949	18.4914	1.70677e-05	0.00537663
AKAP12	-3.1741	4.95038	18.3104	1.87675e-05	0.00580462
TCL1A	-4.01345	1.83867	18.0104	2.19705e-05	0.00667394
VWF	2.27179	6.37959	17.8924	2.33747e-05	0.0069759
COL5A1	-2.55124	5.67971	17.5977	2.72924e-05	0.00800466
FIGN	4.27485	1.69663	17.5102	2.85771e-05	0.0082394
MYOC	7.1799	-0.840881	17.393	3.03945e-05	0.00861736
C7	3.11531	3.53267	17.3313	3.13969e-05	0.00875562
CDH6	3.25754	2.29014	17.2555	3.26743e-05	0.00896488
RGS1	2.64765	6.22232	17.2117	3.3437e-05	0.00902853
CSF1	2.51372	6.24001	16.9455	3.84676e-05	0.0101933
OPALIN	-4.26256	-0.882365	16.9188	3.90125e-05	0.0101933
AREG	3.32792	7.85118	16.8929	3.95483e-05	0.0101933
HHIP	-4.68997	2.32268	16.5342	4.77816e-05	0.0121315
CD248	-3.25925	1.46077	16.3924	5.14923e-05	0.0127883
CCL3L1	5.09808	0.661148	16.3784	5.1872e-05	0.0127883
LTB	-2.95331	5.36667	16.234	5.59803e-05	0.0134728
CD163	3.63627	7.26701	16.2255	5.62324e-05	0.0134728
RNASE1	3.76566	4.53908	15.9798	6.40218e-05	0.0151261
RASAL1	-3.64313	-1.22524	15.903	6.66714e-05	0.0155363
LINC00426	-2.97153	3.30185	15.7804	7.11339e-05	0.0160433
MSR1	4.94129	4.03773	15.7509	7.2254e-05	0.0160433
CH25H	6.24351	-1.57582	15.742	7.25956e-05	0.0160433
EFEMP1	3.99705	0.139945	15.73	7.30551e-05	0.0160433
BLNK	-2.40816	4.71024	15.7169	7.35626e-05	0.0160433
HHIP-AS1	-3.64263	2.06885	15.6194	7.74575e-05	0.0166789
XPNPEP2	-3.48214	0.994632	15.5111	8.202e-05	0.0174405
FCMR	-2.41839	4.18324	15.3913	8.73914e-05	0.0183533
VSIG4	3.53354	4.29322	15.2277	9.52929e-05	0.0197686
C6orf25	2.50875	6.13225	15.1644	9.85458e-05	0.0201971
PROS1	2.49303	4.65666	15.0127	0.00010679	0.0216263
GSTM3	2.75578	5.09446	14.9622	0.000109685	0.0219512
MAFB	3.00148	6.40103	14.9103	0.000112743	0.0222506
SPP1	7.2194	6.32189	14.8823	0.00011443	0.0222506
DUSP26	-4.54726	2.40197	14.8712	0.000115105	0.0222506
ADH1B	5.5244	0.170291	14.6789	0.000127464	0.0242668
PER1	2.16437	8.18403	14.6653	0.000128388	0.0242668
CDKN1A	2.19661	5.42729	14.4658	0.000142725	0.0266802
GH1	-4.35427	-0.780675	14.2663	0.000158681	0.0293404
KLF9	1.80933	6.05008	14.1823	0.000165923	0.0303345
MAFF	1.70017	4.66623	14.1631	0.000167624	0.0303345
POU4F1	-4.0348	-0.399737	14.0523	0.000177792	0.0315298
LRRC26	-2.86407	0.0830637	14.0508	0.000177936	0.0315298
TRPC6	2.30516	3.50737	13.9361	0.000189129	0.0328475
RAB6B	2.23464	4.39917	13.9351	0.000189234	0.0328475
EREG	2.33599	7.82133	13.9154	0.000191227	0.0328583
ADGRF1	-3.70452	-1.1441	13.8589	0.000197057	0.0335213
THBS1	3.31689	8.73206	13.8141	0.000201814	0.0339906
SERPINA5	6.11023	-1.64578	13.7535	0.000208432	0.0347611
LINC00114	-5.51391	0.366228	13.6857	0.000216096	0.0356895
IL1R2	7.25075	7.70697	13.6317	0.000222395	0.0361103
RYR2	3.29325	1.50601	13.6276	0.00022289	0.0361103
RNF152	-3.13971	-0.643935	13.5548	0.000231695	0.0371827
CDH1	2.70161	5.09848	13.5079	0.000237561	0.0377678
CMTM8	-2.86835	2.30329	13.4044	0.000251036	0.0395405
HCAR3	3.59488	2.73601	13.2805	0.000268181	0.0418534
CCL4L2	4.32811	0.911938	13.2151	0.000277709	0.0429409
CYGB	-2.8539	3.47725	13.1963	0.000280509	0.0429409
CREB3L1	-3.80039	-0.581897	13.1815	0.000282722	0.0429409
G0S2	3.08133	5.13422	13.1427	0.000288647	0.0434529
FXYD2	-4.20627	-1.71174	13.1102	0.000293688	0.0438239
ALPL	4.48251	4.24928	12.9793	0.000314953	0.0464086
ADAMTS1	2.80802	1.96746	12.9667	0.000317085	0.0464086
DDR1	-2.14034	3.53134	12.9543	0.000319194	0.0464086
VSIG1	-4.82586	-0.788042	12.8122	0.000344371	0.0493468
MYL9	2.74324	5.33038	12.8077	0.000345204	0.0493468

## Sheet: 3. LSK cells.1
Bone Marrow-Derived LSK cells from 'F1-Lupus vs F1-Prediseased Female Mice' (|FC|1.5, FDR<0.05)
	Gene.stable.ID.version	Gene.stable.ID	Gene.name	Gene.type	Chromosome/scaffold.name	Gene.start.(bp)	Gene.end.(bp)	Gene.description	logFC	logCPM	LR	PValue	FDR
1	ENSMUSG00000000157.16	ENSMUSG00000000157	Itgb2l	protein_coding	16	96422288	96443619	integrin beta 2-like [Source:MGI Symbol;Acc:MGI:1277979]	3.47712	4.53052	13.207	0.000278909	0.0209765
2	ENSMUSG00000000204.16	ENSMUSG00000000204	Slfn4	protein_coding	11	83175186	83190216	schlafen 4 [Source:MGI Symbol;Acc:MGI:1329010]	3.16893	5.25374	11.7992	0.000592556	0.0321117
3	ENSMUSG00000000276.11	ENSMUSG00000000276	Dgke	protein_coding	11	89035179	89066850	diacylglycerol kinase, epsilon [Source:MGI Symbol;Acc:MGI:1889276]	-0.819519	5.64213	11.3212	0.000766275	0.0377038
4	ENSMUSG00000000690.5	ENSMUSG00000000690	Hoxb6	protein_coding	11	96292476	96301569	homeobox B6 [Source:MGI Symbol;Acc:MGI:96187]	1.57349	1.30965	13.2381	0.000274314	0.020789
5	ENSMUSG00000000731.15	ENSMUSG00000000731	Aire	protein_coding	10	78030022	78043610	autoimmune regulator (autoimmune polyendocrinopathy candidiasis ectodermal dystrophy) [Source:MGI Symbol;Acc:MGI:1338803]	-1.75313	3.63734	22.9315	1.6788e-06	0.000562826
6	ENSMUSG00000001025.8	ENSMUSG00000001025	S100a6	protein_coding	3	90612882	90624181	S100 calcium binding protein A6 (calcyclin) [Source:MGI Symbol;Acc:MGI:1339467]	1.89749	4.62501	10.4847	0.0012037	0.0498228
7	ENSMUSG00000001095.5	ENSMUSG00000001095	Slc13a2	protein_coding	11	78397087	78422217	solute carrier family 13 (sodium-dependent dicarboxylate transporter), member 2 [Source:MGI Symbol;Acc:MGI:1276558]	2.67669	0.172418	17.5459	2.80449e-05	0.00458453
8	ENSMUSG00000001435.15	ENSMUSG00000001435	Col18a1	protein_coding	10	77052178	77166548	collagen, type XVIII, alpha 1 [Source:MGI Symbol;Acc:MGI:88451]	1.81283	2.15827	13.5104	0.000237248	0.0186963
9	ENSMUSG00000001482.15	ENSMUSG00000001482	Def8	protein_coding	8	123423527	123463270	differentially expressed in FDCP 8 [Source:MGI Symbol;Acc:MGI:1346331]	0.919135	7.20951	12.4303	0.000422421	0.0271282
10	ENSMUSG00000001768.16	ENSMUSG00000001768	Rin2	protein_coding	2	145675215	145887616	Ras and Rab interactor 2 [Source:MGI Symbol;Acc:MGI:1921280]	1.18499	3.31991	12.0849	0.000508307	0.0295715
11	ENSMUSG00000001930.17	ENSMUSG00000001930	Vwf	protein_coding	6	125546774	125686679	Von Willebrand factor [Source:MGI Symbol;Acc:MGI:98941]	2.11526	5.46268	33.3471	7.70932e-09	1.5249e-05
12	ENSMUSG00000001946.14	ENSMUSG00000001946	Esam	protein_coding	9	37528078	37538319	endothelial cell-specific adhesion molecule [Source:MGI Symbol;Acc:MGI:1916774]	1.12358	4.88694	11.9552	0.000544945	0.0306713
13	ENSMUSG00000002808.7	ENSMUSG00000002808	Epdr1	protein_coding	13	19591706	19619927	ependymin related protein 1 (zebrafish) [Source:MGI Symbol;Acc:MGI:2145369]	1.27683	2.76831	10.5748	0.00114642	0.0486353
14	ENSMUSG00000002985.16	ENSMUSG00000002985	Apoe	protein_coding	7	19696109	19699188	apolipoprotein E [Source:MGI Symbol;Acc:MGI:88057]	1.39654	6.38644	24.6241	6.96745e-07	0.000328134
15	ENSMUSG00000003134.10	ENSMUSG00000003134	Tbc1d8	protein_coding	1	39371492	39478755	TBC1 domain family, member 8 [Source:MGI Symbol;Acc:MGI:1927225]	1.02382	5.68998	11.9109	0.000558079	0.0310235
16	ENSMUSG00000003153.10	ENSMUSG00000003153	Slc2a3	protein_coding	6	122727809	122801640	solute carrier family 2 (facilitated glucose transporter), member 3 [Source:MGI Symbol;Acc:MGI:95757]	0.786907	6.83334	11.475	0.00070537	0.0355018
17	ENSMUSG00000003283.14	ENSMUSG00000003283	Hck	protein_coding	2	153108468	153151441	hemopoietic cell kinase [Source:MGI Symbol;Acc:MGI:96052]	2.48294	4.15721	13.9754	0.000185223	0.0162308
18	ENSMUSG00000003484.4	ENSMUSG00000003484	Cyp4f18	protein_coding	8	71988482	72009626	cytochrome P450, family 4, subfamily f, polypeptide 18 [Source:MGI Symbol;Acc:MGI:1919304]	2.72684	3.01929	11.1718	0.000830505	0.039584
19	ENSMUSG00000004044.9	ENSMUSG00000004044	Cavin1	protein_coding	11	100956733	100970887	caveolae associated 1 [Source:MGI Symbol;Acc:MGI:1277968]	1.19906	5.19442	12.5298	0.000400513	0.0262479
20	ENSMUSG00000004668.14	ENSMUSG00000004668	Abca13	protein_coding	11	9191942	9684259	ATP-binding cassette, sub-family A (ABC1), member 13 [Source:MGI Symbol;Acc:MGI:2388707]	2.95457	3.66158	11.6488	0.000642444	0.033707
21	ENSMUSG00000004730.15	ENSMUSG00000004730	Adgre1	protein_coding	17	57358691	57483527	adhesion G protein-coupled receptor E1 [Source:MGI Symbol;Acc:MGI:106912]	3.03265	1.90739	17.6028	2.72182e-05	0.00456251
22	ENSMUSG00000004864.13	ENSMUSG00000004864	Mapk13	protein_coding	17	28769297	28780233	mitogen-activated protein kinase 13 [Source:MGI Symbol;Acc:MGI:1346864]	2.59329	2.92122	10.9107	0.000956089	0.0437765
23	ENSMUSG00000005125.13	ENSMUSG00000005125	Ndrg1	protein_coding	15	66929318	66969640	N-myc downstream regulated gene 1 [Source:MGI Symbol;Acc:MGI:1341799]	1.22052	6.05185	20.8365	5.00204e-06	0.00135535
24	ENSMUSG00000005237.14	ENSMUSG00000005237	Dnah2	protein_coding	11	69420809	69549110	dynein, axonemal, heavy chain 2 [Source:MGI Symbol;Acc:MGI:107731]	2.1567	-0.504952	13.6113	0.000224823	0.0178595
25	ENSMUSG00000005611.15	ENSMUSG00000005611	Mrvi1	protein_coding	7	110868266	110982461	MRV integration site 1 [Source:MGI Symbol;Acc:MGI:1338023]	-1.77565	3.33097	16.2185	5.64412e-05	0.00739342
26	ENSMUSG00000005686.17	ENSMUSG00000005686	Ampd3	protein_coding	7	110768206	110812405	adenosine monophosphate deaminase 3 [Source:MGI Symbol;Acc:MGI:1096344]	1.28631	4.20486	12.1565	0.000489182	0.0290191
27	ENSMUSG00000005800.3	ENSMUSG00000005800	Mmp8	protein_coding	9	7558456	7568485	matrix metallopeptidase 8 [Source:MGI Symbol;Acc:MGI:1202395]	3.35987	5.75463	12.7113	0.000363462	0.0250497
28	ENSMUSG00000005803.14	ENSMUSG00000005803	Sqor	protein_coding	2	122765237	122809569	sulfide quinone oxidoreductase [Source:MGI Symbol;Acc:MGI:1929899]	1.51269	3.99933	16.0224	6.25978e-05	0.00784835
29	ENSMUSG00000006143.12	ENSMUSG00000006143	Upk3bl	protein_coding	5	136054492	136064326	uroplakin 3B-like [Source:MGI Symbol;Acc:MGI:1916915]	1.79611	-0.595539	10.9288	0.000946808	0.0435532
30	ENSMUSG00000006205.13	ENSMUSG00000006205	Htra1	protein_coding	7	130936111	130985660	HtrA serine peptidase 1 [Source:MGI Symbol;Acc:MGI:1929076]	2.05793	-0.0104835	11.6531	0.000640971	0.033707
31	ENSMUSG00000006386.15	ENSMUSG00000006386	Tek	protein_coding	4	94739289	94874976	TEK receptor tyrosine kinase [Source:MGI Symbol;Acc:MGI:98664]	1.29425	3.92711	12.2268	0.000471071	0.0281504
32	ENSMUSG00000008153.11	ENSMUSG00000008153	Clstn3	protein_coding	6	124430759	124464794	calsyntenin 3 [Source:MGI Symbol;Acc:MGI:2178323]	1.05505	4.57149	10.5989	0.00113155	0.0485511
33	ENSMUSG00000008540.11	ENSMUSG00000008540	Mgst1	protein_coding	6	138140316	138156755	microsomal glutathione S-transferase 1 [Source:MGI Symbol;Acc:MGI:1913850]	1.63279	3.97083	12.6116	0.000383357	0.0258799
34	ENSMUSG00000009292.18	ENSMUSG00000009292	Trpm2	protein_coding	10	77907722	77970563	transient receptor potential cation channel, subfamily M, member 2 [Source:MGI Symbol;Acc:MGI:1351901]	2.71413	4.05737	16.0196	6.26916e-05	0.00784835
35	ENSMUSG00000009378.3	ENSMUSG00000009378	Slc16a12	protein_coding	19	34668403	34747289	solute carrier family 16 (monocarboxylic acid transporters), member 12 [Source:MGI Symbol;Acc:MGI:2147716]	1.48879	3.86982	13.4713	0.000242235	0.0188638
36	ENSMUSG00000009418.15	ENSMUSG00000009418	Nav1	protein_coding	1	135434580	135607295	neuron navigator 1 [Source:MGI Symbol;Acc:MGI:2183683]	1.25705	5.58765	16.0708	6.10179e-05	0.00778667
37	ENSMUSG00000009628.14	ENSMUSG00000009628	Tex15	protein_coding	8	33516738	33585582	testis expressed gene 15 [Source:MGI Symbol;Acc:MGI:1934816]	2.22902	1.0613	11.1723	0.000830274	0.039584
38	ENSMUSG00000010461.15	ENSMUSG00000010461	Eya4	protein_coding	10	23102963	23350786	EYA transcriptional coactivator and phosphatase 4 [Source:MGI Symbol;Acc:MGI:1337104]	2.63201	0.366753	20.2856	6.67007e-06	0.00171343
39	ENSMUSG00000011751.16	ENSMUSG00000011751	Sptbn4	protein_coding	7	27356383	27447686	spectrin beta, non-erythrocytic 4 [Source:MGI Symbol;Acc:MGI:1890574]	1.3088	1.80342	10.7967	0.0010168	0.0455375
40	ENSMUSG00000014361.5	ENSMUSG00000014361	Mertk	protein_coding	2	128698956	128802894	c-mer proto-oncogene tyrosine kinase [Source:MGI Symbol;Acc:MGI:96965]	1.92344	0.0954749	12.5681	0.000392382	0.0262479
41	ENSMUSG00000015053.14	ENSMUSG00000015053	Gata2	protein_coding	6	88193891	88207032	GATA binding protein 2 [Source:MGI Symbol;Acc:MGI:95662]	1.56234	7.24361	24.7327	6.58587e-07	0.000328134
42	ENSMUSG00000015094.16	ENSMUSG00000015094	Npdc1	protein_coding	2	25399351	25409494	neural proliferation, differentiation and control 1 [Source:MGI Symbol;Acc:MGI:1099802]	1.45614	3.99696	13.8405	0.000199	0.0168936
43	ENSMUSG00000015143.15	ENSMUSG00000015143	Actn1	protein_coding	12	80167547	80260371	actinin, alpha 1 [Source:MGI Symbol;Acc:MGI:2137706]	1.32696	5.40601	12.8858	0.000331086	0.0236422
44	ENSMUSG00000015854.7	ENSMUSG00000015854	Cd5l	protein_coding	3	87357881	87371073	CD5 antigen-like [Source:MGI Symbol;Acc:MGI:1334419]	3.34644	0.841276	35.4106	2.67036e-09	7.54569e-06
45	ENSMUSG00000015932.8	ENSMUSG00000015932	Dstn	protein_coding	2	143915320	143943324	destrin [Source:MGI Symbol;Acc:MGI:1929270]	1.32617	5.72205	15.8789	6.75286e-05	0.00829637
46	ENSMUSG00000015947.10	ENSMUSG00000015947	Fcgr1	protein_coding	3	96282909	96293969	Fc receptor, IgG, high affinity I [Source:MGI Symbol;Acc:MGI:95498]	2.3103	0.0835637	16.7566	4.24937e-05	0.00600376
47	ENSMUSG00000015950.13	ENSMUSG00000015950	Ncf1	protein_coding	5	134220053	134229625	neutrophil cytosolic factor 1 [Source:MGI Symbol;Acc:MGI:97283]	1.30268	6.91561	10.9432	0.000939499	0.0433177
48	ENSMUSG00000016024.9	ENSMUSG00000016024	Lbp	protein_coding	2	158306493	158332852	lipopolysaccharide binding protein [Source:MGI Symbol;Acc:MGI:1098776]	1.65898	4.95968	35.0891	3.14964e-09	7.54763e-06
49	ENSMUSG00000016756.17	ENSMUSG00000016756	Cmah	protein_coding	13	24327404	24477377	cytidine monophospho-N-acetylneuraminic acid hydroxylase [Source:MGI Symbol;Acc:MGI:103227]	-1.08358	7.47735	11.1446	0.000842761	0.0399756
50	ENSMUSG00000017667.9	ENSMUSG00000017667	Zfp334	protein_coding	2	165374264	165388259	zinc finger protein 334 [Source:MGI Symbol;Acc:MGI:2388656]	1.89371	-0.166076	12.2952	0.000454122	0.0277012
51	ENSMUSG00000017737.2	ENSMUSG00000017737	Mmp9	protein_coding	2	164940780	164955850	matrix metallopeptidase 9 [Source:MGI Symbol;Acc:MGI:97011]	3.17579	6.42193	11.6555	0.000640145	0.033707
52	ENSMUSG00000017754.13	ENSMUSG00000017754	Pltp	protein_coding	2	164839518	164857711	phospholipid transfer protein [Source:MGI Symbol;Acc:MGI:103151]	2.09675	1.06696	12.0792	0.000509874	0.0295757
53	ENSMUSG00000019832.5	ENSMUSG00000019832	Rab32	protein_coding	10	10545002	10558265	RAB32, member RAS oncogene family [Source:MGI Symbol;Acc:MGI:1915094]	1.04674	4.90511	16.3758	5.19437e-05	0.00698943
54	ENSMUSG00000019894.14	ENSMUSG00000019894	Slc6a15	protein_coding	10	103367783	103419377	solute carrier family 6 (neurotransmitter transporter), member 15 [Source:MGI Symbol;Acc:MGI:2143484]	1.46341	3.66322	11.7269	0.000616045	0.0331124
55	ENSMUSG00000019935.16	ENSMUSG00000019935	Slc17a8	protein_coding	10	89574020	89621253	solute carrier family 17 (sodium-dependent inorganic phosphate cotransporter), member 8 [Source:MGI Symbol;Acc:MGI:3039629]	2.10918	2.71332	20.2272	6.87688e-06	0.00174391
56	ENSMUSG00000020019.4	ENSMUSG00000020019	Ntn4	protein_coding	10	93640681	93747207	netrin 4 [Source:MGI Symbol;Acc:MGI:1888978]	1.68466	1.23238	11.4249	0.000724674	0.0361059
57	ENSMUSG00000020027.18	ENSMUSG00000020027	Socs2	protein_coding	10	95385362	95417180	suppressor of cytokine signaling 2 [Source:MGI Symbol;Acc:MGI:1201787]	-1.4988	4.7857	17.4802	2.90315e-05	0.00470691
58	ENSMUSG00000020135.13	ENSMUSG00000020135	Apc2	protein_coding	10	80295977	80318263	adenomatosis polyposis coli 2 [Source:MGI Symbol;Acc:MGI:1346052]	1.29045	2.19233	10.7396	0.00104865	0.046147
59	ENSMUSG00000020176.17	ENSMUSG00000020176	Grb10	protein_coding	11	11930508	12038683	growth factor receptor bound protein 10 [Source:MGI Symbol;Acc:MGI:103232]	1.11371	5.06487	13.2907	0.00026673	0.0203704
60	ENSMUSG00000020227.10	ENSMUSG00000020227	Irak3	protein_coding	10	120141648	120202130	interleukin-1 receptor-associated kinase 3 [Source:MGI Symbol;Acc:MGI:1921164]	1.31494	4.87675	25.8951	3.60478e-07	0.00022282
61	ENSMUSG00000020310.9	ENSMUSG00000020310	Madcam1	protein_coding	10	79664559	79668537	mucosal vascular addressin cell adhesion molecule 1 [Source:MGI Symbol;Acc:MGI:103579]	-3.78628	-1.42911	23.1803	1.47502e-06	0.000530472
62	ENSMUSG00000020407.13	ENSMUSG00000020407	Upp1	protein_coding	11	9118103	9136170	uridine phosphorylase 1 [Source:MGI Symbol;Acc:MGI:1097668]	1.45481	2.50548	13.9161	0.000191159	0.0164397
63	ENSMUSG00000020609.14	ENSMUSG00000020609	Apob	protein_coding	12	7977648	8016835	apolipoprotein B [Source:MGI Symbol;Acc:MGI:88052]	2.27413	2.05184	16.8051	4.14208e-05	0.00598032
64	ENSMUSG00000020681.14	ENSMUSG00000020681	Ace	protein_coding	11	105967945	105989964	angiotensin I converting enzyme (peptidyl-dipeptidase A) 1 [Source:MGI Symbol;Acc:MGI:87874]	4.5318	2.42472	21.1639	4.21639e-06	0.00119143
65	ENSMUSG00000020689.4	ENSMUSG00000020689	Itgb3	protein_coding	11	104608000	104670476	integrin beta 3 [Source:MGI Symbol;Acc:MGI:96612]	1.26331	5.48578	18.1794	2.01041e-05	0.00364825
66	ENSMUSG00000020709.15	ENSMUSG00000020709	Adap2	protein_coding	11	80154105	80178958	ArfGAP with dual PH domains 2 [Source:MGI Symbol;Acc:MGI:2663075]	1.95202	-0.334835	12.2152	0.000474024	0.0282415
67	ENSMUSG00000020773.11	ENSMUSG00000020773	Trim47	protein_coding	11	116105752	116127210	tripartite motif-containing 47 [Source:MGI Symbol;Acc:MGI:1917374]	1.64146	4.97923	24.928	5.95107e-07	0.000318141
68	ENSMUSG00000020774.9	ENSMUSG00000020774	Aspa	protein_coding	11	73304992	73329596	aspartoacylase [Source:MGI Symbol;Acc:MGI:87914]	2.52337	1.88453	25.9157	3.56658e-07	0.00022282
69	ENSMUSG00000020787.14	ENSMUSG00000020787	P2rx1	protein_coding	11	72999103	73015200	purinergic receptor P2X, ligand-gated ion channel, 1 [Source:MGI Symbol;Acc:MGI:1098235]	1.06332	5.09277	15.7918	7.07098e-05	0.00851155
70	ENSMUSG00000020846.6	ENSMUSG00000020846	Rflnb	protein_coding	11	76019194	76027782	refilin B [Source:MGI Symbol;Acc:MGI:1923816]	2.14826	4.47712	11.0901	0.000867877	0.0407758
71	ENSMUSG00000020865.16	ENSMUSG00000020865	Abcc3	protein_coding	11	94343295	94392997	ATP-binding cassette, sub-family C (CFTR/MRP), member 3 [Source:MGI Symbol;Acc:MGI:1923658]	1.88349	1.47648	12.3793	0.000434109	0.0272447
72	ENSMUSG00000020902.12	ENSMUSG00000020902	Ntn1	protein_coding	11	68209364	68400823	netrin 1 [Source:MGI Symbol;Acc:MGI:105088]	-1.9464	-0.412632	11.6878	0.000629126	0.0334519
73	ENSMUSG00000020961.15	ENSMUSG00000020961	Ston2	protein_coding	12	91633009	91788387	stonin 2 [Source:MGI Symbol;Acc:MGI:1918272]	1.08859	3.04889	10.5318	0.00117335	0.0488608
74	ENSMUSG00000021069.17	ENSMUSG00000021069	Pygl	protein_coding	12	70190811	70231488	liver glycogen phosphorylase [Source:MGI Symbol;Acc:MGI:97829]	1.87967	6.31682	25.1648	5.26338e-07	0.000289194
75	ENSMUSG00000021125.6	ENSMUSG00000021125	Arg2	protein_coding	12	79130777	79156301	arginase type II [Source:MGI Symbol;Acc:MGI:1330806]	3.2561	0.0031041	13.1908	0.000281331	0.0210785
76	ENSMUSG00000021268.17	ENSMUSG00000021268	Meg3	lincRNA	12	109541001	109571726	maternally expressed 3 [Source:MGI Symbol;Acc:MGI:1202886]	-1.52343	3.70779	15.55	8.03503e-05	0.009349
77	ENSMUSG00000021280.9	ENSMUSG00000021280	Exoc3l4	protein_coding	12	111417017	111431678	exocyst complex component 3-like 4 [Source:MGI Symbol;Acc:MGI:1921363]	2.36731	0.529755	15.0206	0.000106345	0.0114321
78	ENSMUSG00000021281.15	ENSMUSG00000021281	Tnfaip2	protein_coding	12	111442469	111455018	tumor necrosis factor, alpha-induced protein 2 [Source:MGI Symbol;Acc:MGI:104960]	1.19468	5.74053	13.0719	0.000299766	0.0217992
79	ENSMUSG00000021559.14	ENSMUSG00000021559	Dapk1	protein_coding	13	60601947	60763191	death associated protein kinase 1 [Source:MGI Symbol;Acc:MGI:1916885]	0.927196	4.71382	11.9469	0.00054737	0.0306713
80	ENSMUSG00000021596.16	ENSMUSG00000021596	Mctp1	protein_coding	13	76384535	77031810	multiple C2 domains, transmembrane 1 [Source:MGI Symbol;Acc:MGI:1926021]	1.06826	5.24138	19.4068	1.05628e-05	0.00240152
81	ENSMUSG00000021614.16	ENSMUSG00000021614	Vcan	protein_coding	13	89655312	89742509	versican [Source:MGI Symbol;Acc:MGI:102889]	1.93639	0.977126	12.1492	0.000491092	0.0290191
82	ENSMUSG00000021796.15	ENSMUSG00000021796	Bmpr1a	protein_coding	14	34410734	34503341	bone morphogenetic protein receptor, type 1A [Source:MGI Symbol;Acc:MGI:1338938]	2.14441	3.19455	33.0374	9.04041e-09	1.62563e-05
83	ENSMUSG00000022015.8	ENSMUSG00000022015	Tnfsf11	protein_coding	14	78277445	78308043	tumor necrosis factor (ligand) superfamily, member 11 [Source:MGI Symbol;Acc:MGI:1100089]	-2.22338	3.34171	15.8205	6.96457e-05	0.00845148
84	ENSMUSG00000022026.7	ENSMUSG00000022026	Olfm4	protein_coding	14	79984081	80023139	olfactomedin 4 [Source:MGI Symbol;Acc:MGI:2685142]	3.6434	4.36045	14.441	0.000144623	0.0142252
85	ENSMUSG00000022037.15	ENSMUSG00000022037	Clu	protein_coding	14	65968483	65981547	clusterin [Source:MGI Symbol;Acc:MGI:88423]	1.9876	2.72491	14.5394	0.000137261	0.0139949
86	ENSMUSG00000022103.10	ENSMUSG00000022103	Gfra2	protein_coding	14	70890120	70979838	glial cell line derived neurotrophic factor family receptor alpha 2 [Source:MGI Symbol;Acc:MGI:1195462]	-2.1761	3.41256	11.0448	0.000889385	0.0415887
87	ENSMUSG00000022225.7	ENSMUSG00000022225	Cma1	protein_coding	14	55941451	55944675	chymase 1, mast cell [Source:MGI Symbol;Acc:MGI:96941]	3.24519	-1.77658	14.2587	0.000159319	0.0152238
88	ENSMUSG00000022261.6	ENSMUSG00000022261	Sdc2	protein_coding	15	32920723	33034935	syndecan 2 [Source:MGI Symbol;Acc:MGI:1349165]	1.30645	2.77245	10.8971	0.000963124	0.0439968
89	ENSMUSG00000022367.7	ENSMUSG00000022367	Has2	protein_coding	15	56665627	56694539	hyaluronan synthase 2 [Source:MGI Symbol;Acc:MGI:107821]	3.93545	-0.925096	13.7335	0.000210663	0.0170775
90	ENSMUSG00000022371.16	ENSMUSG00000022371	Col14a1	protein_coding	15	55307750	55520803	collagen, type XIV, alpha 1 [Source:MGI Symbol;Acc:MGI:1341272]	2.42629	-0.497666	14.9912	0.000108012	0.0115485
91	ENSMUSG00000022468.12	ENSMUSG00000022468	Endou	protein_coding	15	97711015	97731339	endonuclease, polyU-specific [Source:MGI Symbol;Acc:MGI:97746]	-1.46344	3.492	16.2006	5.69764e-05	0.00741442
92	ENSMUSG00000022508.5	ENSMUSG00000022508	Bcl6	protein_coding	16	23965052	23988852	B cell leukemia/lymphoma 6 [Source:MGI Symbol;Acc:MGI:107187]	1.27042	4.02079	12.3247	0.000446999	0.027593
93	ENSMUSG00000022512.3	ENSMUSG00000022512	Cldn1	protein_coding	16	26356642	26371841	claudin 1 [Source:MGI Symbol;Acc:MGI:1276109]	3.4411	1.17896	14.735	0.000123726	0.0128805
94	ENSMUSG00000022623.16	ENSMUSG00000022623	Shank3	protein_coding	15	89499623	89560261	SH3 and multiple ankyrin repeat domains 3 [Source:MGI Symbol;Acc:MGI:1930016]	1.2317	6.36195	23.0172	1.60556e-06	0.00054776
95	ENSMUSG00000022788.16	ENSMUSG00000022788	Fgd4	protein_coding	16	16416917	16600549	FYVE, RhoGEF and PH domain containing 4 [Source:MGI Symbol;Acc:MGI:2183747]	1.30272	4.76	15.7079	7.39129e-05	0.00880721
96	ENSMUSG00000022818.13	ENSMUSG00000022818	Cyp2ab1	protein_coding	16	20308387	20325404	cytochrome P450, family 2, subfamily ab, polypeptide 1 [Source:MGI Symbol;Acc:MGI:3644957]	3.98157	-0.854876	19.4709	1.02144e-05	0.00237695
97	ENSMUSG00000022824.12	ENSMUSG00000022824	Muc13	protein_coding	16	33794037	33819934	mucin 13, epithelial transmembrane [Source:MGI Symbol;Acc:MGI:103190]	1.99639	7.1688	27.9051	1.27412e-07	0.000114555
98	ENSMUSG00000022885.16	ENSMUSG00000022885	St6gal1	protein_coding	16	23224740	23360350	beta galactoside alpha 2,6 sialyltransferase 1 [Source:MGI Symbol;Acc:MGI:108470]	-1.17671	6.52978	18.6232	1.59267e-05	0.0031191
99	ENSMUSG00000022892.11	ENSMUSG00000022892	App	protein_coding	16	84949685	85173766	amyloid beta (A4) precursor protein [Source:MGI Symbol;Acc:MGI:88059]	1.50936	5.41924	21.4078	3.71248e-06	0.00109601
100	ENSMUSG00000023022.14	ENSMUSG00000023022	Lima1	protein_coding	15	99778470	99875456	LIM domain and actin binding 1 [Source:MGI Symbol;Acc:MGI:1920992]	1.23308	3.57485	14.2229	0.000162386	0.015262
101	ENSMUSG00000023092.16	ENSMUSG00000023092	Fhl1	protein_coding	X	56731787	56793346	four and a half LIM domains 1 [Source:MGI Symbol;Acc:MGI:1298387]	1.4455	3.95476	14.1215	0.000171374	0.0155494
102	ENSMUSG00000023191.9	ENSMUSG00000023191	P3h3	protein_coding	6	124841089	124857752	prolyl 3-hydroxylase 3 [Source:MGI Symbol;Acc:MGI:1315208]	1.01598	5.22661	13.8013	0.000203198	0.0169346
103	ENSMUSG00000023349.14	ENSMUSG00000023349	Clec4n	protein_coding	6	123229843	123247021	C-type lectin domain family 4, member n [Source:MGI Symbol;Acc:MGI:1861231]	2.64586	-1.26547	10.7304	0.00105389	0.046147
104	ENSMUSG00000023473.12	ENSMUSG00000023473	Celsr3	protein_coding	9	108826320	108852969	cadherin, EGF LAG seven-pass G-type receptor 3 [Source:MGI Symbol;Acc:MGI:1858236]	2.64584	1.6922	10.7974	0.00101645	0.0455375
105	ENSMUSG00000023886.10	ENSMUSG00000023886	Smoc2	protein_coding	17	14279506	14404790	SPARC related modular calcium binding 2 [Source:MGI Symbol;Acc:MGI:1929881]	2.47956	-1.91321	15.8978	6.68578e-05	0.00826529
106	ENSMUSG00000023913.17	ENSMUSG00000023913	Pla2g7	protein_coding	17	43568098	43612201	phospholipase A2, group VII (platelet-activating factor acetylhydrolase, plasma) [Source:MGI Symbol;Acc:MGI:1351327]	3.18925	2.22515	10.992	0.000915067	0.0423888
107	ENSMUSG00000023960.13	ENSMUSG00000023960	Enpp5	protein_coding	17	44078813	44086567	ectonucleotide pyrophosphatase/phosphodiesterase 5 [Source:MGI Symbol;Acc:MGI:1933830]	1.04218	4.51708	14.0056	0.000182263	0.0160945
108	ENSMUSG00000024011.16	ENSMUSG00000024011	Pi16	protein_coding	17	29318877	29329413	peptidase inhibitor 16 [Source:MGI Symbol;Acc:MGI:1921366]	2.59874	3.67184	11.0247	0.000899073	0.0418439
109	ENSMUSG00000024053.11	ENSMUSG00000024053	Emilin2	protein_coding	17	71252172	71311978	elastin microfibril interfacer 2 [Source:MGI Symbol;Acc:MGI:2389136]	1.88037	5.19615	54.4181	1.62067e-13	3.20569e-09
110	ENSMUSG00000024164.15	ENSMUSG00000024164	C3	protein_coding	17	57203970	57228136	complement component 3 [Source:MGI Symbol;Acc:MGI:88227]	2.8212	6.16433	13.7351	0.000210483	0.0170775
111	ENSMUSG00000024500.18	ENSMUSG00000024500	Ppp2r2b	protein_coding	18	42637432	43059471	protein phosphatase 2, regulatory subunit B, beta [Source:MGI Symbol;Acc:MGI:1920180]	2.60157	0.764925	14.0947	0.000173833	0.0155865
112	ENSMUSG00000024621.15	ENSMUSG00000024621	Csf1r	protein_coding	18	61105572	61132149	colony stimulating factor 1 receptor [Source:MGI Symbol;Acc:MGI:1339758]	1.82337	5.40433	13.7803	0.000205475	0.0169346
113	ENSMUSG00000024659.14	ENSMUSG00000024659	Anxa1	protein_coding	19	20373428	20390944	annexin A1 [Source:MGI Symbol;Acc:MGI:96819]	2.78318	7.1446	24.6614	6.83391e-07	0.000328134
114	ENSMUSG00000024679.10	ENSMUSG00000024679	Ms4a6d	protein_coding	19	11586604	11604849	membrane-spanning 4-domains, subfamily A, member 6D [Source:MGI Symbol;Acc:MGI:1916024]	2.76742	-0.187904	19.684	9.13648e-06	0.00223111
115	ENSMUSG00000024730.7	ENSMUSG00000024730	Ms4a8a	protein_coding	19	11067471	11081102	membrane-spanning 4-domains, subfamily A, member 8A [Source:MGI Symbol;Acc:MGI:1927657]	3.30106	-0.978943	16.771	4.21729e-05	0.00600129
116	ENSMUSG00000024774.15	ENSMUSG00000024774	Ankrd22	protein_coding	19	34122549	34166053	ankyrin repeat domain 22 [Source:MGI Symbol;Acc:MGI:1277101]	2.97823	1.61492	10.5561	0.00115807	0.0486353
117	ENSMUSG00000025014.12	ENSMUSG00000025014	Dntt	protein_coding	19	41029275	41059523	deoxynucleotidyltransferase, terminal [Source:MGI Symbol;Acc:MGI:98659]	-1.73847	9.33983	11.2696	0.000787871	0.0384792
118	ENSMUSG00000025044.16	ENSMUSG00000025044	Msr1	protein_coding	8	39581685	39642673	macrophage scavenger receptor 1 [Source:MGI Symbol;Acc:MGI:98257]	3.74266	-0.399748	18.2501	1.93715e-05	0.00354785
119	ENSMUSG00000025089.15	ENSMUSG00000025089	Gfra1	protein_coding	19	58235604	58455909	glial cell line derived neurotrophic factor family receptor alpha 1 [Source:MGI Symbol;Acc:MGI:1100842]	-2.59178	3.69921	26.9453	2.09296e-07	0.000153329
120	ENSMUSG00000025094.7	ENSMUSG00000025094	Slc18a2	protein_coding	19	59260878	59296012	solute carrier family 18 (vesicular monoamine), member 2 [Source:MGI Symbol;Acc:MGI:106677]	1.37962	6.91126	36.1364	1.83979e-09	6.06516e-06
121	ENSMUSG00000025161.16	ENSMUSG00000025161	Slc16a3	protein_coding	11	120948480	120960868	solute carrier family 16 (monocarboxylic acid transporters), member 3 [Source:MGI Symbol;Acc:MGI:1933438]	1.83732	4.09145	12.6685	0.000371872	0.0253642
122	ENSMUSG00000025170.13	ENSMUSG00000025170	Rab40b	protein_coding	11	121356125	121388251	Rab40B, member RAS oncogene family [Source:MGI Symbol;Acc:MGI:2183451]	2.16635	0.950926	18.6255	1.59078e-05	0.0031191
123	ENSMUSG00000025207.15	ENSMUSG00000025207	Sema4g	protein_coding	19	44989101	45003397	sema domain, immunoglobulin domain (Ig), transmembrane domain (TM) and short cytoplasmic domain, (semaphorin) 4G [Source:MGI Symbol;Acc:MGI:1347047]	-1.38645	3.59879	15.784	7.10013e-05	0.00851155
124	ENSMUSG00000025330.6	ENSMUSG00000025330	Padi4	protein_coding	4	140745865	140774236	peptidyl arginine deiminase, type IV [Source:MGI Symbol;Acc:MGI:1338898]	1.28379	6.43513	17.2171	3.33413e-05	0.00515561
125	ENSMUSG00000025351.14	ENSMUSG00000025351	Cd63	protein_coding	10	128900989	128912822	CD63 antigen [Source:MGI Symbol;Acc:MGI:99529]	1.25868	6.02039	17.0794	3.58487e-05	0.00537187
126	ENSMUSG00000025375.15	ENSMUSG00000025375	Aatk	protein_coding	11	120007313	120047167	apoptosis-associated tyrosine kinase [Source:MGI Symbol;Acc:MGI:1197518]	1.31159	3.69063	11.8038	0.000591087	0.0321117
127	ENSMUSG00000025608.9	ENSMUSG00000025608	Podxl	protein_coding	6	31519488	31563981	podocalyxin-like [Source:MGI Symbol;Acc:MGI:1351317]	1.55476	3.125	10.9595	0.000931228	0.0430367
128	ENSMUSG00000025804.5	ENSMUSG00000025804	Ccr1	protein_coding	9	123962124	123968692	chemokine (C-C motif) receptor 1 [Source:MGI Symbol;Acc:MGI:104618]	2.99732	2.87092	11.4678	0.000708122	0.0355499
129	ENSMUSG00000025877.14	ENSMUSG00000025877	Hk3	protein_coding	13	55005985	55021385	hexokinase 3 [Source:MGI Symbol;Acc:MGI:2670962]	1.43266	6.57467	14.338	0.000152747	0.0148105
130	ENSMUSG00000025887.10	ENSMUSG00000025887	Casp12	protein_coding	9	5345430	5373032	caspase 12 [Source:MGI Symbol;Acc:MGI:1312922]	1.27834	4.39964	16.1475	5.85945e-05	0.00757516
131	ENSMUSG00000025969.15	ENSMUSG00000025969	Nrp2	protein_coding	1	62703285	62818695	neuropilin 2 [Source:MGI Symbol;Acc:MGI:1100492]	-1.62734	3.93979	16.5042	4.8542e-05	0.0066218
132	ENSMUSG00000026177.11	ENSMUSG00000026177	Slc11a1	protein_coding	1	74375195	74386062	solute carrier family 11 (proton-coupled divalent metal ion transporters), member 1 [Source:MGI Symbol;Acc:MGI:1345275]	3.03546	2.51292	10.8795	0.000972364	0.0443165
133	ENSMUSG00000026180.8	ENSMUSG00000026180	Cxcr2	protein_coding	1	74153989	74161246	chemokine (C-X-C motif) receptor 2 [Source:MGI Symbol;Acc:MGI:105303]	2.73702	4.00878	10.7953	0.00101757	0.0455375
134	ENSMUSG00000026193.15	ENSMUSG00000026193	Fn1	protein_coding	1	71585520	71653200	fibronectin 1 [Source:MGI Symbol;Acc:MGI:95566]	3.86058	5.10105	38.5429	5.35636e-10	2.64872e-06
135	ENSMUSG00000026271.15	ENSMUSG00000026271	Gpr35	protein_coding	1	92950865	92986391	G protein-coupled receptor 35 [Source:MGI Symbol;Acc:MGI:1929509]	2.54819	1.1437	17.1777	3.40408e-05	0.00515561
136	ENSMUSG00000026303.6	ENSMUSG00000026303	Mlph	protein_coding	1	90915085	90951142	melanophilin [Source:MGI Symbol;Acc:MGI:2176380]	2.08159	1.4905	13.4571	0.000244078	0.0189328
137	ENSMUSG00000026315.13	ENSMUSG00000026315	Serpinb8	protein_coding	1	107590006	107610484	serine (or cysteine) peptidase inhibitor, clade B, member 8 [Source:MGI Symbol;Acc:MGI:894657]	1.87194	1.77107	19.7218	8.95754e-06	0.00221475
138	ENSMUSG00000026357.3	ENSMUSG00000026357	Rgs18	protein_coding	1	144752683	144775435	regulator of G-protein signaling 18 [Source:MGI Symbol;Acc:MGI:1927498]	0.801505	6.33087	12.03	0.000523515	0.0300148
139	ENSMUSG00000026365.15	ENSMUSG00000026365	Cfh	protein_coding	1	140084708	140183764	complement component factor h [Source:MGI Symbol;Acc:MGI:88385]	2.30028	0.399732	10.7425	0.00104705	0.046147
140	ENSMUSG00000026398.14	ENSMUSG00000026398	Nr5a2	protein_coding	1	136842571	136960448	nuclear receptor subfamily 5, group A, member 2 [Source:MGI Symbol;Acc:MGI:1346834]	-3.10649	-1.54499	13.2713	0.000269498	0.0205026
141	ENSMUSG00000026450.14	ENSMUSG00000026450	Chit1	protein_coding	1	134111242	134151540	chitinase 1 (chitotriosidase) [Source:MGI Symbol;Acc:MGI:1919134]	2.54846	0.304594	12.3824	0.000433391	0.0272447
142	ENSMUSG00000026579.8	ENSMUSG00000026579	F5	protein_coding	1	164151838	164220277	coagulation factor V [Source:MGI Symbol;Acc:MGI:88382]	2.816	3.92738	28.0202	1.20059e-07	0.000113084
143	ENSMUSG00000026580.16	ENSMUSG00000026580	Selp	protein_coding	1	164115264	164150026	selectin, platelet [Source:MGI Symbol;Acc:MGI:98280]	2.79099	4.40299	34.9206	3.43421e-09	7.54763e-06
144	ENSMUSG00000026822.14	ENSMUSG00000026822	Lcn2	protein_coding	2	32384633	32388252	lipocalin 2 [Source:MGI Symbol;Acc:MGI:96757]	3.35699	7.74459	13.1125	0.000293333	0.0215452
145	ENSMUSG00000026835.15	ENSMUSG00000026835	Fcnb	protein_coding	2	28076378	28084885	ficolin B [Source:MGI Symbol;Acc:MGI:1341158]	2.90859	4.62821	11.5281	0.000685509	0.0347843
146	ENSMUSG00000026896.14	ENSMUSG00000026896	Ifih1	protein_coding	2	62595798	62646255	interferon induced with helicase C domain 1 [Source:MGI Symbol;Acc:MGI:1918836]	0.835339	5.07717	11.7497	0.000608523	0.0327973
147	ENSMUSG00000026928.14	ENSMUSG00000026928	Card9	protein_coding	2	26352176	26360918	caspase recruitment domain family, member 9 [Source:MGI Symbol;Acc:MGI:2685628]	1.49955	4.7436	13.9231	0.000190446	0.0164397
148	ENSMUSG00000026938.10	ENSMUSG00000026938	Fcna	protein_coding	2	25624666	25628030	ficolin A [Source:MGI Symbol;Acc:MGI:1340905]	2.10974	0.318112	12.2738	0.000459353	0.0277012
149	ENSMUSG00000026986.14	ENSMUSG00000026986	Hnmt	protein_coding	2	24002910	24049394	histamine N-methyltransferase [Source:MGI Symbol;Acc:MGI:2153181]	1.32761	3.09687	10.7293	0.00105452	0.046147
150	ENSMUSG00000027071.14	ENSMUSG00000027071	P2rx3	protein_coding	2	84998583	85037462	purinergic receptor P2X, ligand-gated ion channel, 3 [Source:MGI Symbol;Acc:MGI:1097160]	-1.41782	1.36899	10.549	0.00116252	0.0486353
151	ENSMUSG00000027322.11	ENSMUSG00000027322	Siglec1	protein_coding	2	131069220	131086765	sialic acid binding Ig-like lectin 1, sialoadhesin [Source:MGI Symbol;Acc:MGI:99668]	2.83839	0.534084	16.9905	3.75678e-05	0.00558714
152	ENSMUSG00000027359.16	ENSMUSG00000027359	Slc27a2	protein_coding	2	126552407	126588243	solute carrier family 27 (fatty acid transporter), member 2 [Source:MGI Symbol;Acc:MGI:1347099]	-2.07528	1.71016	15.6768	7.51388e-05	0.00886269
153	ENSMUSG00000027750.16	ENSMUSG00000027750	Postn	protein_coding	3	54361109	54391037	periostin, osteoblast specific factor [Source:MGI Symbol;Acc:MGI:1926321]	-1.54006	2.78562	19.4732	1.02022e-05	0.00237695
154	ENSMUSG00000027803.14	ENSMUSG00000027803	Wwtr1	protein_coding	3	57455649	57575910	WW domain containing transcription regulator 1 [Source:MGI Symbol;Acc:MGI:1917649]	2.52437	1.91798	25.3745	4.72129e-07	0.00026682
155	ENSMUSG00000027831.9	ENSMUSG00000027831	Veph1	protein_coding	3	66053558	66296837	ventricular zone expressed PH domain-containing 1 [Source:MGI Symbol;Acc:MGI:1920039]	2.53517	0.237425	16.0277	6.2423e-05	0.00784835
156	ENSMUSG00000027962.14	ENSMUSG00000027962	Vcam1	protein_coding	3	116109949	116129688	vascular cell adhesion molecule 1 [Source:MGI Symbol;Acc:MGI:98926]	2.11843	3.16509	12.4594	0.000415892	0.0268835
157	ENSMUSG00000028125.14	ENSMUSG00000028125	Abca4	protein_coding	3	122044443	122180123	ATP-binding cassette, sub-family A (ABC1), member 4 [Source:MGI Symbol;Acc:MGI:109424]	2.15327	3.08859	24.4524	7.61676e-07	0.000340125
158	ENSMUSG00000028497.12	ENSMUSG00000028497	Hacd4	protein_coding	4	88396144	88438928	3-hydroxyacyl-CoA dehydratase 4 [Source:MGI Symbol;Acc:MGI:1914025]	1.12964	5.20814	18.6249	1.59132e-05	0.0031191
159	ENSMUSG00000028655.11	ENSMUSG00000028655	Mfsd2a	protein_coding	4	122946850	122961188	major facilitator superfamily domain containing 2A [Source:MGI Symbol;Acc:MGI:1923824]	-1.91927	-0.0967471	12.132	0.000495632	0.0291055
160	ENSMUSG00000028717.12	ENSMUSG00000028717	Tal1	protein_coding	4	115056426	115071755	T cell acute lymphocytic leukemia 1 [Source:MGI Symbol;Acc:MGI:98480]	0.852548	6.62055	11.0123	0.000905115	0.0420262
161	ENSMUSG00000028859.14	ENSMUSG00000028859	Csf3r	protein_coding	4	126024550	126044440	colony stimulating factor 3 receptor (granulocyte) [Source:MGI Symbol;Acc:MGI:1339755]	1.16938	7.4548	13.4716	0.000242206	0.0188638
162	ENSMUSG00000028874.14	ENSMUSG00000028874	Fgr	protein_coding	4	132974095	133001910	FGR proto-oncogene, Src family tyrosine kinase [Source:MGI Symbol;Acc:MGI:95527]	1.76799	4.90919	10.5732	0.00114741	0.0486353
163	ENSMUSG00000028885.8	ENSMUSG00000028885	Smpdl3b	protein_coding	4	132732966	132757252	sphingomyelin phosphodiesterase, acid-like 3B [Source:MGI Symbol;Acc:MGI:1916022]	3.42167	0.0124286	28.1132	1.14421e-07	0.000113084
164	ENSMUSG00000029086.15	ENSMUSG00000029086	Prom1	protein_coding	5	43993620	44102032	prominin 1 [Source:MGI Symbol;Acc:MGI:1100886]	2.67872	2.50725	12.0577	0.000515793	0.0298148
165	ENSMUSG00000029108.14	ENSMUSG00000029108	Pcdh7	protein_coding	5	57717967	58133230	protocadherin 7 [Source:MGI Symbol;Acc:MGI:1860487]	1.47435	3.37373	10.7488	0.00104346	0.046147
166	ENSMUSG00000029205.12	ENSMUSG00000029205	Chrna9	protein_coding	5	65934921	65977326	cholinergic receptor, nicotinic, alpha polypeptide 9 [Source:MGI Symbol;Acc:MGI:1202403]	-2.42919	-1.35846	13.5864	0.000227835	0.0180263
167	ENSMUSG00000029490.3	ENSMUSG00000029490	Mfsd7a	protein_coding	5	108441054	108448891	major facilitator superfamily domain containing 7A [Source:MGI Symbol;Acc:MGI:2442629]	1.39171	1.49647	10.7808	0.00102556	0.0456881
168	ENSMUSG00000029561.17	ENSMUSG00000029561	Oasl2	protein_coding	5	114896936	114912234	2'-5' oligoadenylate synthetase-like 2 [Source:MGI Symbol;Acc:MGI:1344390]	1.01007	5.61278	16.5223	4.80823e-05	0.00660464
169	ENSMUSG00000029596.13	ENSMUSG00000029596	Sdsl	protein_coding	5	120458186	120472810	serine dehydratase-like [Source:MGI Symbol;Acc:MGI:2182607]	1.60751	4.9447	22.5649	2.03166e-06	0.000641345
170	ENSMUSG00000029602.11	ENSMUSG00000029602	Rasal1	protein_coding	5	120648812	120679597	RAS protein activator like 1 (GAP1 like) [Source:MGI Symbol;Acc:MGI:1330842]	-1.37308	4.67826	23.0165	1.60617e-06	0.00054776
171	ENSMUSG00000029716.13	ENSMUSG00000029716	Tfr2	protein_coding	5	137569840	137587481	transferrin receptor 2 [Source:MGI Symbol;Acc:MGI:1354956]	1.08986	6.31976	18.784	1.46388e-05	0.00304796
172	ENSMUSG00000029781.7	ENSMUSG00000029781	Fkbp9	protein_coding	6	56832059	56879358	FK506 binding protein 9 [Source:MGI Symbol;Acc:MGI:1350921]	1.18713	4.80538	11.4768	0.000704712	0.0355018
173	ENSMUSG00000029797.13	ENSMUSG00000029797	Sspo	protein_coding	6	48448229	48501250	SCO-spondin [Source:MGI Symbol;Acc:MGI:2674311]	-1.9976	4.61788	16.8459	4.05409e-05	0.00590624
174	ENSMUSG00000030054.4	ENSMUSG00000030054	Gp9	protein_coding	6	87778072	87779768	glycoprotein 9 (platelet) [Source:MGI Symbol;Acc:MGI:1860137]	1.50567	2.98083	12.384	0.000433029	0.0272447
175	ENSMUSG00000030117.5	ENSMUSG00000030117	Gdf3	protein_coding	6	122605403	122610087	growth differentiation factor 3 [Source:MGI Symbol;Acc:MGI:95686]	1.60551	2.53855	15.1288	0.000100422	0.0110969
176	ENSMUSG00000030137.8	ENSMUSG00000030137	Tuba8	protein_coding	6	121210696	121226854	tubulin, alpha 8 [Source:MGI Symbol;Acc:MGI:1858225]	1.24542	2.86885	11.7177	0.000619085	0.0331856
177	ENSMUSG00000030142.10	ENSMUSG00000030142	Clec4e	protein_coding	6	123281789	123289870	C-type lectin domain family 4, member e [Source:MGI Symbol;Acc:MGI:1861232]	2.47112	3.98621	37.3675	9.78391e-10	3.87051e-06
178	ENSMUSG00000030144.4	ENSMUSG00000030144	Clec4d	protein_coding	6	123262111	123275265	C-type lectin domain family 4, member d [Source:MGI Symbol;Acc:MGI:1298389]	2.30546	2.5733	12.8255	0.000341923	0.0239831
179	ENSMUSG00000030148.15	ENSMUSG00000030148	Clec4a2	protein_coding	6	123106428	123143999	C-type lectin domain family 4, member a2 [Source:MGI Symbol;Acc:MGI:1349412]	3.36961	3.30895	14.0927	0.000174015	0.0155865
180	ENSMUSG00000030159.15	ENSMUSG00000030159	Clec1b	protein_coding	6	129397297	129409335	C-type lectin domain family 1, member b [Source:MGI Symbol;Acc:MGI:1913287]	2.09835	0.121239	13.8976	0.00019304	0.0164583
181	ENSMUSG00000030208.15	ENSMUSG00000030208	Emp1	protein_coding	6	135362545	135383173	epithelial membrane protein 1 [Source:MGI Symbol;Acc:MGI:107941]	-1.55952	5.98358	20.355	6.4326e-06	0.00167417
182	ENSMUSG00000030214.7	ENSMUSG00000030214	Plbd1	protein_coding	6	136612070	136661928	phospholipase B domain containing 1 [Source:MGI Symbol;Acc:MGI:1914107]	2.60653	4.87932	14.3668	0.000150428	0.0146574
183	ENSMUSG00000030340.16	ENSMUSG00000030340	Scnn1a	protein_coding	6	125320659	125344943	sodium channel, nonvoltage-gated 1 alpha [Source:MGI Symbol;Acc:MGI:101782]	1.74389	2.06364	11.5449	0.000679356	0.0347843
184	ENSMUSG00000030341.17	ENSMUSG00000030341	Tnfrsf1a	protein_coding	6	125349362	125362484	tumor necrosis factor receptor superfamily, member 1a [Source:MGI Symbol;Acc:MGI:1314884]	0.749757	6.46801	12.1221	0.000498276	0.0291595
185	ENSMUSG00000030342.8	ENSMUSG00000030342	Cd9	protein_coding	6	125460266	125494791	CD9 antigen [Source:MGI Symbol;Acc:MGI:88348]	1.19252	5.17408	23.0747	1.55827e-06	0.00054776
186	ENSMUSG00000030427.17	ENSMUSG00000030427	Lilra6	protein_coding	7	3908280	3915503	leukocyte immunoglobulin-like receptor, subfamily A (with TM domain), member 6 [Source:MGI Symbol;Acc:MGI:1195969]	2.72234	2.09222	12.8423	0.000338877	0.023854
187	ENSMUSG00000030554.16	ENSMUSG00000030554	Synm	protein_coding	7	67730160	67759742	synemin, intermediate filament protein [Source:MGI Symbol;Acc:MGI:2661187]	1.7533	0.0500483	11.8555	0.000574921	0.0315887
188	ENSMUSG00000030711.15	ENSMUSG00000030711	Sult1a1	protein_coding	7	126672865	126676432	sulfotransferase family 1A, phenol-preferring, member 1 [Source:MGI Symbol;Acc:MGI:102896]	1.86456	3.79153	24.6708	6.80062e-07	0.000328134
189	ENSMUSG00000030717.9	ENSMUSG00000030717	Nupr1	protein_coding	7	126623249	126630861	nuclear protein transcription regulator 1 [Source:MGI Symbol;Acc:MGI:1891834]	1.64382	2.92384	15.4018	8.69058e-05	0.0099364
190	ENSMUSG00000030786.18	ENSMUSG00000030786	Itgam	protein_coding	7	128062640	128118491	integrin alpha M [Source:MGI Symbol;Acc:MGI:96607]	2.2188	4.66214	16.5535	4.72976e-05	0.00659121
191	ENSMUSG00000031137.17	ENSMUSG00000031137	Fgf13	protein_coding	X	59062145	59568071	fibroblast growth factor 13 [Source:MGI Symbol;Acc:MGI:109178]	-1.65969	1.72386	12.5418	0.000397941	0.0262479
192	ENSMUSG00000031142.17	ENSMUSG00000031142	Cacna1f	protein_coding	X	7607083	7635196	calcium channel, voltage-dependent, alpha 1F subunit [Source:MGI Symbol;Acc:MGI:1859639]	2.35504	-1.60616	10.5706	0.001149	0.0486353
193	ENSMUSG00000031189.12	ENSMUSG00000031189	Aff2	protein_coding	X	69360294	69868037	AF4/FMR2 family, member 2 [Source:MGI Symbol;Acc:MGI:1202294]	4.18583	-0.770919	16.8427	4.06091e-05	0.00590624
194	ENSMUSG00000031257.14	ENSMUSG00000031257	Nox1	protein_coding	X	134086421	134221956	NADPH oxidase 1 [Source:MGI Symbol;Acc:MGI:2450016]	-2.04873	3.97889	23.9154	1.00662e-06	0.000417287
195	ENSMUSG00000031298.15	ENSMUSG00000031298	Adgrg2	protein_coding	X	160390690	160498070	adhesion G protein-coupled receptor G2 [Source:MGI Symbol;Acc:MGI:2446854]	2.21319	1.17812	17.792	2.46421e-05	0.00423844
196	ENSMUSG00000031375.17	ENSMUSG00000031375	Bgn	protein_coding	X	73483602	73495933	biglycan [Source:MGI Symbol;Acc:MGI:88158]	1.10041	4.07419	11.6265	0.000650201	0.0338447
197	ENSMUSG00000031400.10	ENSMUSG00000031400	G6pdx	protein_coding	X	74409483	74429194	glucose-6-phosphate dehydrogenase X-linked [Source:MGI Symbol;Acc:MGI:105979]	0.865915	5.97597	12.0533	0.000517011	0.0298148
198	ENSMUSG00000031428.11	ENSMUSG00000031428	Zcchc18	protein_coding	X	136993155	136998472	zinc finger, CCHC domain containing 18 [Source:MGI Symbol;Acc:MGI:1914245]	-1.0847	4.16347	11.2429	0.000799291	0.0386956
199	ENSMUSG00000031444.16	ENSMUSG00000031444	F10	protein_coding	8	13037308	13056676	coagulation factor X [Source:MGI Symbol;Acc:MGI:103107]	2.77697	2.55373	14.1247	0.000171081	0.0155494
200	ENSMUSG00000031584.16	ENSMUSG00000031584	Gsr	protein_coding	8	33652523	33698163	glutathione reductase [Source:MGI Symbol;Acc:MGI:95804]	1.56516	6.31163	16.5314	4.78513e-05	0.00660464
201	ENSMUSG00000031722.10	ENSMUSG00000031722	Hp	protein_coding	8	109575128	109579172	haptoglobin [Source:MGI Symbol;Acc:MGI:96211]	2.90896	5.79387	12.4015	0.000428995	0.0272447
202	ENSMUSG00000031786.7	ENSMUSG00000031786	Drc7	protein_coding	8	95055103	95078141	dynein regulatory complex subunit 7 [Source:MGI Symbol;Acc:MGI:2685616]	-1.68445	4.86827	22.5545	2.04271e-06	0.000641345
203	ENSMUSG00000032062.2	ENSMUSG00000032062	2310030G06Rik	protein_coding	9	50739691	50746536	RIKEN cDNA 2310030G06 gene [Source:MGI Symbol;Acc:MGI:1914202]	4.18806	-1.93334	15.3528	8.91864e-05	0.0101385
204	ENSMUSG00000032128.15	ENSMUSG00000032128	Robo3	protein_coding	9	37415669	37433246	roundabout guidance receptor 3 [Source:MGI Symbol;Acc:MGI:1343102]	1.71924	3.03676	21.7133	3.16595e-06	0.000948826
205	ENSMUSG00000032193.9	ENSMUSG00000032193	Ldlr	protein_coding	9	21723483	21749919	low density lipoprotein receptor [Source:MGI Symbol;Acc:MGI:96765]	-0.993787	5.4521	15.3099	9.12376e-05	0.0101959
206	ENSMUSG00000032202.11	ENSMUSG00000032202	Rab27a	protein_coding	9	73044854	73097629	RAB27A, member RAS oncogene family [Source:MGI Symbol;Acc:MGI:1861441]	0.820058	6.3309	14.1899	0.000165257	0.0154188
207	ENSMUSG00000032204.13	ENSMUSG00000032204	Aqp9	protein_coding	9	71110659	71168682	aquaporin 9 [Source:MGI Symbol;Acc:MGI:1891066]	0.940588	4.41412	11.6306	0.000648766	0.0338447
208	ENSMUSG00000032369.13	ENSMUSG00000032369	Plscr1	protein_coding	9	92249750	92272278	phospholipid scramblase 1 [Source:MGI Symbol;Acc:MGI:893575]	0.857434	4.84426	13.0872	0.000297324	0.0217014
209	ENSMUSG00000032372.14	ENSMUSG00000032372	Plscr2	protein_coding	9	92275602	92297752	phospholipid scramblase 2 [Source:MGI Symbol;Acc:MGI:1270860]	2.46747	2.08194	22.4125	2.19939e-06	0.000669292
210	ENSMUSG00000032375.15	ENSMUSG00000032375	Aph1b	protein_coding	9	66775202	66795490	aph1 homolog B, gamma secretase subunit [Source:MGI Symbol;Acc:MGI:3522097]	1.29146	2.84878	14.1424	0.000169482	0.0155494
211	ENSMUSG00000032484.8	ENSMUSG00000032484	Ngp	protein_coding	9	110419747	110423012	neutrophilic granule protein [Source:MGI Symbol;Acc:MGI:105983]	3.43607	9.47135	11.8657	0.000571758	0.0315025
212	ENSMUSG00000032496.7	ENSMUSG00000032496	Ltf	protein_coding	9	111019271	111042767	lactotransferrin [Source:MGI Symbol;Acc:MGI:96837]	3.29712	8.91199	10.8402	0.000993208	0.0451624
213	ENSMUSG00000032503.18	ENSMUSG00000032503	Arpp21	protein_coding	9	112065091	112235938	cyclic AMP-regulated phosphoprotein, 21 [Source:MGI Symbol;Acc:MGI:107562]	-1.88266	5.23234	20.6087	5.63396e-06	0.00150594
214	ENSMUSG00000032531.15	ENSMUSG00000032531	Amotl2	protein_coding	9	102716672	102733418	angiomotin-like 2 [Source:MGI Symbol;Acc:MGI:1929286]	2.26831	2.85063	27.4512	1.61106e-07	0.000134409
215	ENSMUSG00000032556.11	ENSMUSG00000032556	Bfsp2	protein_coding	9	103424924	103480420	beaded filament structural protein 2, phakinin [Source:MGI Symbol;Acc:MGI:1333828]	-1.52562	3.03458	14.218	0.000162805	0.015262
216	ENSMUSG00000032661.9	ENSMUSG00000032661	Oas3	protein_coding	5	120753098	120777661	2'-5' oligoadenylate synthetase 3 [Source:MGI Symbol;Acc:MGI:2180850]	1.09924	5.05937	17.1966	3.37036e-05	0.00515561
217	ENSMUSG00000032702.16	ENSMUSG00000032702	Kank1	protein_coding	19	25236975	25434496	KN motif and ankyrin repeat domains 1 [Source:MGI Symbol;Acc:MGI:2147707]	2.03586	-0.491452	10.6268	0.0011146	0.0480323
218	ENSMUSG00000032845.15	ENSMUSG00000032845	Alpk2	protein_coding	18	65265529	65393888	alpha-kinase 2 [Source:MGI Symbol;Acc:MGI:2449492]	-1.47114	2.30848	11.1059	0.000860527	0.0406234
219	ENSMUSG00000032854.12	ENSMUSG00000032854	Ugt8a	protein_coding	3	125865271	125938619	UDP galactosyltransferase 8A [Source:MGI Symbol;Acc:MGI:109522]	1.91698	1.58603	14.1669	0.000167288	0.0154624
220	ENSMUSG00000032864.4	ENSMUSG00000032864	Rag2	protein_coding	2	101624718	101632529	recombination activating gene 2 [Source:MGI Symbol;Acc:MGI:97849]	-1.68786	3.23798	12.1311	0.000495882	0.0291055
221	ENSMUSG00000032915.6	ENSMUSG00000032915	Adgre4	protein_coding	17	55749984	55853662	adhesion G protein-coupled receptor E4 [Source:MGI Symbol;Acc:MGI:1196464]	3.38944	2.35459	27.0074	2.0268e-07	0.000153329
222	ENSMUSG00000032936.13	ENSMUSG00000032936	Camkv	protein_coding	9	107935674	107949691	CaM kinase-like vesicle-associated [Source:MGI Symbol;Acc:MGI:2384296]	-1.61046	3.36785	13.7944	0.000203941	0.0169346
223	ENSMUSG00000033082.10	ENSMUSG00000033082	Clec1a	protein_coding	6	129424772	129452000	C-type lectin domain family 1, member a [Source:MGI Symbol;Acc:MGI:2444151]	2.15737	2.83775	23.2054	1.45589e-06	0.000530472
224	ENSMUSG00000033191.14	ENSMUSG00000033191	Tie1	protein_coding	4	118471191	118490061	tyrosine kinase with immunoglobulin-like and EGF-like domains 1 [Source:MGI Symbol;Acc:MGI:99906]	0.973173	6.6492	12.1122	0.000500923	0.0292279
225	ENSMUSG00000033255.8	ENSMUSG00000033255	Gm5134	protein_coding	10	75954514	76009591	predicted gene 5134 [Source:MGI Symbol;Acc:MGI:3646667]	-1.31385	2.87565	11.5829	0.000665605	0.0344651
226	ENSMUSG00000033763.14	ENSMUSG00000033763	Mtss1l	protein_coding	8	110721476	110741400	metastasis suppressor 1-like [Source:MGI Symbol;Acc:MGI:3039591]	1.23752	4.70177	16.5526	4.73181e-05	0.00659121
227	ENSMUSG00000033777.4	ENSMUSG00000033777	Tlr13	protein_coding	X	106143204	106160493	toll-like receptor 13 [Source:MGI Symbol;Acc:MGI:3045213]	3.17205	2.47986	14.9655	0.000109495	0.0116442
228	ENSMUSG00000034271.16	ENSMUSG00000034271	Jdp2	protein_coding	12	85599027	85639878	Jun dimerization protein 2 [Source:MGI Symbol;Acc:MGI:1932093]	1.11581	4.97924	11.5354	0.000682834	0.0347843
229	ENSMUSG00000034486.8	ENSMUSG00000034486	Gbx2	protein_coding	1	89927956	89931179	gastrulation brain homeobox 2 [Source:MGI Symbol;Acc:MGI:95668]	1.89586	1.18818	14.5112	0.000139326	0.014094
230	ENSMUSG00000034641.2	ENSMUSG00000034641	Cd300ld	protein_coding	11	114982274	114989922	CD300 molecule like family member d [Source:MGI Symbol;Acc:MGI:2442358]	5.0445	1.44318	19.6142	9.47612e-06	0.00225829
231	ENSMUSG00000034648.9	ENSMUSG00000034648	Lrrn1	protein_coding	6	107529768	107570214	leucine rich repeat protein 1, neuronal [Source:MGI Symbol;Acc:MGI:106038]	2.62046	-1.23349	14.6118	0.000132086	0.0136076
232	ENSMUSG00000034652.12	ENSMUSG00000034652	Cd300a	protein_coding	11	114890041	114904654	CD300A molecule [Source:MGI Symbol;Acc:MGI:2443411]	1.55735	4.5862	26.4515	2.70235e-07	0.000184319
233	ENSMUSG00000034664.13	ENSMUSG00000034664	Itga2b	protein_coding	11	102453297	102470122	integrin alpha 2b [Source:MGI Symbol;Acc:MGI:96601]	1.98259	6.38293	48.6332	3.08594e-12	3.052e-08
234	ENSMUSG00000034780.6	ENSMUSG00000034780	B3galt1	protein_coding	2	67565871	68122689	UDP-Gal:betaGlcNAc beta 1,3-galactosyltransferase, polypeptide 1 [Source:MGI Symbol;Acc:MGI:1349403]	2.67864	0.261247	13.9072	0.000192056	0.0164454
235	ENSMUSG00000034858.16	ENSMUSG00000034858	Fam214a	protein_coding	9	74952884	75032468	family with sequence similarity 214, member A [Source:MGI Symbol;Acc:MGI:2387648]	-1.26204	7.28207	12.6913	0.000367371	0.0251439
236	ENSMUSG00000034957.10	ENSMUSG00000034957	Cebpa	protein_coding	7	35119293	35121928	CCAAT/enhancer binding protein (C/EBP), alpha [Source:MGI Symbol;Acc:MGI:99480]	1.7506	5.73093	41.9992	9.13092e-11	6.02032e-07
237	ENSMUSG00000035004.3	ENSMUSG00000035004	Igsf6	protein_coding	7	121064067	121074572	immunoglobulin superfamily, member 6 [Source:MGI Symbol;Acc:MGI:1891393]	2.21537	4.71786	10.5482	0.00116302	0.0486353
238	ENSMUSG00000035451.7	ENSMUSG00000035451	Foxa1	protein_coding	12	57540628	57546916	forkhead box A1 [Source:MGI Symbol;Acc:MGI:1347472]	-3.77336	-0.947911	16.4489	4.99793e-05	0.00677117
239	ENSMUSG00000035493.10	ENSMUSG00000035493	Tgfbi	protein_coding	13	56609523	56639562	transforming growth factor, beta induced [Source:MGI Symbol;Acc:MGI:99959]	2.36146	4.63236	32.6078	1.12764e-08	1.85872e-05
240	ENSMUSG00000036273.15	ENSMUSG00000036273	Lrrk2	protein_coding	15	91673175	91816120	leucine-rich repeat kinase 2 [Source:MGI Symbol;Acc:MGI:1913975]	1.83587	4.86407	18.4376	1.75562e-05	0.00331761
241	ENSMUSG00000036295.5	ENSMUSG00000036295	Lrrn3	protein_coding	12	41451668	41486431	leucine rich repeat protein 3, neuronal [Source:MGI Symbol;Acc:MGI:106036]	-1.42757	4.35987	13.2269	0.000275963	0.0208342
242	ENSMUSG00000036322.10	ENSMUSG00000036322	H2-Ea-ps	unprocessed_pseudogene	17	34342933	34344643	histocompatibility 2, class II antigen E alpha, pseudogene [Source:MGI Symbol;Acc:MGI:95900]	1.17131	4.31651	17.5611	2.78229e-05	0.00458453
243	ENSMUSG00000036377.18	ENSMUSG00000036377	C530008M17Rik	protein_coding	5	76656512	76873554	RIKEN cDNA C530008M17 gene [Source:MGI Symbol;Acc:MGI:2444817]	1.25303	4.42308	14.4325	0.000145273	0.0142252
244	ENSMUSG00000036469.16	ENSMUSG00000036469	43525	protein_coding	8	65617900	66471637	membrane-associated ring finger (C3HC4) 1 [Source:MGI Symbol;Acc:MGI:1920175]	2.59635	2.3976	17.1814	3.39747e-05	0.00515561
245	ENSMUSG00000036523.16	ENSMUSG00000036523	Greb1	protein_coding	12	16670615	16800886	gene regulated by estrogen in breast cancer protein [Source:MGI Symbol;Acc:MGI:2149712]	3.2576	-0.0492399	17.5853	2.74711e-05	0.0045662
246	ENSMUSG00000036718.17	ENSMUSG00000036718	Micall2	protein_coding	5	139706696	139736336	MICAL-like 2 [Source:MGI Symbol;Acc:MGI:2444818]	1.02251	4.67967	13.6182	0.000224008	0.0178595
247	ENSMUSG00000036887.5	ENSMUSG00000036887	C1qa	protein_coding	4	136895917	136898803	complement component 1, q subcomponent, alpha polypeptide [Source:MGI Symbol;Acc:MGI:88223]	2.21046	1.34416	15.0339	0.0001056	0.0114321
248	ENSMUSG00000036896.5	ENSMUSG00000036896	C1qc	protein_coding	4	136889804	136893065	complement component 1, q subcomponent, C chain [Source:MGI Symbol;Acc:MGI:88225]	2.46716	1.30032	17.1719	3.41448e-05	0.00515561
249	ENSMUSG00000037095.8	ENSMUSG00000037095	Lrg1	protein_coding	17	56119678	56122001	leucine-rich alpha-2-glycoprotein 1 [Source:MGI Symbol;Acc:MGI:1924155]	3.12441	3.90332	10.7652	0.00103425	0.0459717
250	ENSMUSG00000037336.14	ENSMUSG00000037336	Mfsd2b	protein_coding	12	4862440	4874359	major facilitator superfamily domain containing 2B [Source:MGI Symbol;Acc:MGI:3583946]	0.949973	4.9332	12.5117	0.000404409	0.0264
251	ENSMUSG00000037348.15	ENSMUSG00000037348	Paqr7	protein_coding	4	134496697	134510235	progestin and adipoQ receptor family member VII [Source:MGI Symbol;Acc:MGI:1919154]	0.899442	4.91476	12.5294	0.000400599	0.0262479
252	ENSMUSG00000037366.14	ENSMUSG00000037366	Pafah2	protein_coding	4	134396320	134427413	platelet-activating factor acetylhydrolase 2 [Source:MGI Symbol;Acc:MGI:2140321]	0.842473	5.86414	12.8684	0.000334181	0.0236979
253	ENSMUSG00000037492.16	ENSMUSG00000037492	Zmat4	protein_coding	8	23636019	24156585	zinc finger, matrin type 4 [Source:MGI Symbol;Acc:MGI:2443497]	2.23447	-1.88716	11.2459	0.000798004	0.0386956
254	ENSMUSG00000037784.14	ENSMUSG00000037784	Dzip1l	protein_coding	9	99629496	99669256	DAZ interacting protein 1-like [Source:MGI Symbol;Acc:MGI:1919757]	2.88823	-1.04991	11.701	0.000624669	0.0333945
255	ENSMUSG00000037820.15	ENSMUSG00000037820	Tgm2	protein_coding	2	158116402	158146436	transglutaminase 2, C polypeptide [Source:MGI Symbol;Acc:MGI:98731]	1.78297	6.18019	31.676	1.82164e-08	2.57372e-05
256	ENSMUSG00000038068.15	ENSMUSG00000038068	Rnf144b	protein_coding	13	47122656	47247991	ring finger protein 144B [Source:MGI Symbol;Acc:MGI:2384986]	1.21604	3.69354	14.0064	0.000182185	0.0160945
257	ENSMUSG00000038168.5	ENSMUSG00000038168	P3h2	protein_coding	16	25959288	26105784	prolyl 3-hydroxylase 2 [Source:MGI Symbol;Acc:MGI:2146663]	2.01583	0.529468	18.0387	2.16458e-05	0.0038228
258	ENSMUSG00000038188.17	ENSMUSG00000038188	Scarf1	protein_coding	11	75513540	75526582	scavenger receptor class F, member 1 [Source:MGI Symbol;Acc:MGI:2449455]	1.16909	5.39735	14.2649	0.000158798	0.0152238
259	ENSMUSG00000038357.10	ENSMUSG00000038357	Camp	protein_coding	9	109847379	109849617	cathelicidin antimicrobial peptide [Source:MGI Symbol;Acc:MGI:108443]	3.38411	7.98631	12.2908	0.000455207	0.0277012
260	ENSMUSG00000038527.9	ENSMUSG00000038527	C1rl	protein_coding	6	124493113	124510643	complement component 1, r subcomponent-like [Source:MGI Symbol;Acc:MGI:2660692]	1.60562	3.28486	23.3168	1.37397e-06	0.000530472
261	ENSMUSG00000038738.15	ENSMUSG00000038738	Shank1	protein_coding	7	44310253	44360572	SH3 and multiple ankyrin repeat domains 1 [Source:MGI Symbol;Acc:MGI:3613677]	-1.38137	2.72047	11.222	0.000808346	0.0389978
262	ENSMUSG00000038843.17	ENSMUSG00000038843	Gcnt1	protein_coding	19	17326141	17356667	glucosaminyl (N-acetyl) transferase 1, core 2 [Source:MGI Symbol;Acc:MGI:95676]	0.812594	5.51386	12.3933	0.000430877	0.0272447
263	ENSMUSG00000039037.5	ENSMUSG00000039037	St6galnac5	protein_coding	3	152817081	152982246	ST6 (alpha-N-acetyl-neuraminyl-2,3-beta-galactosyl-1,3)-N-acetylgalactosaminide alpha-2,6-sialyltransferase 5 [Source:MGI Symbol;Acc:MGI:1349471]	1.81867	2.36774	23.8069	1.06499e-06	0.000429909
264	ENSMUSG00000039084.8	ENSMUSG00000039084	Chad	protein_coding	11	94565047	94569127	chondroadherin [Source:MGI Symbol;Acc:MGI:1096866]	1.58465	2.06771	12.5306	0.000400335	0.0262479
265	ENSMUSG00000039126.10	ENSMUSG00000039126	Prune2	protein_coding	19	16956118	17223932	prune homolog 2 [Source:MGI Symbol;Acc:MGI:1925004]	1.85715	1.34299	13.6224	0.000223503	0.0178595
266	ENSMUSG00000039270.9	ENSMUSG00000039270	Megf9	protein_coding	4	70427065	70534995	multiple EGF-like-domains 9 [Source:MGI Symbol;Acc:MGI:1918264]	1.503	4.87377	12.8057	0.000345573	0.0241371
267	ENSMUSG00000039542.16	ENSMUSG00000039542	Ncam1	protein_coding	9	49502136	49798925	neural cell adhesion molecule 1 [Source:MGI Symbol;Acc:MGI:97281]	2.24596	2.15297	12.4786	0.000411642	0.0267838
268	ENSMUSG00000039699.13	ENSMUSG00000039699	Batf2	protein_coding	19	6140983	6172476	basic leucine zipper transcription factor, ATF-like 2 [Source:MGI Symbol;Acc:MGI:1921731]	1.60962	1.67564	12.4664	0.000414342	0.0268711
269	ENSMUSG00000039813.14	ENSMUSG00000039813	Tbc1d2	protein_coding	4	46604390	46650209	TBC1 domain family, member 2 [Source:MGI Symbol;Acc:MGI:2652885]	0.909837	4.44173	11.4575	0.00071207	0.0356576
270	ENSMUSG00000040152.8	ENSMUSG00000040152	Thbs1	protein_coding	2	118111876	118127133	thrombospondin 1 [Source:MGI Symbol;Acc:MGI:98737]	2.22164	6.66623	19.0532	1.27126e-05	0.00276325
271	ENSMUSG00000040522.5	ENSMUSG00000040522	Tlr8	protein_coding	X	167242696	167264329	toll-like receptor 8 [Source:MGI Symbol;Acc:MGI:2176887]	3.44968	1.02504	19.1144	1.23112e-05	0.00273613
272	ENSMUSG00000040562.12	ENSMUSG00000040562	Gstm2	protein_coding	3	107981702	107986453	glutathione S-transferase, mu 2 [Source:MGI Symbol;Acc:MGI:95861]	2.23302	0.392957	14.6442	0.000129831	0.0134453
273	ENSMUSG00000040605.7	ENSMUSG00000040605	Bace2	protein_coding	16	97356742	97442936	beta-site APP-cleaving enzyme 2 [Source:MGI Symbol;Acc:MGI:1860440]	2.91456	1.5536	23.2732	1.40544e-06	0.000530472
274	ENSMUSG00000040690.15	ENSMUSG00000040690	Col16a1	protein_coding	4	130047840	130099283	collagen, type XVI, alpha 1 [Source:MGI Symbol;Acc:MGI:1095396]	1.1404	5.21124	16.2224	5.63231e-05	0.00739342
275	ENSMUSG00000041324.14	ENSMUSG00000041324	Inhba	protein_coding	13	16011851	16031621	inhibin beta-A [Source:MGI Symbol;Acc:MGI:96570]	2.59646	2.33699	11.9486	0.000546883	0.0306713
276	ENSMUSG00000041362.16	ENSMUSG00000041362	Shtn1	protein_coding	19	58973358	59076069	shootin 1 [Source:MGI Symbol;Acc:MGI:1918903]	1.38204	2.52339	14.4726	0.000142217	0.0142073
277	ENSMUSG00000041481.16	ENSMUSG00000041481	Serpina3g	protein_coding	12	104236245	104241939	serine (or cysteine) peptidase inhibitor, clade A, member 3G [Source:MGI Symbol;Acc:MGI:105046]	0.983637	7.1329	10.5032	0.0011917	0.0495208
278	ENSMUSG00000041548.4	ENSMUSG00000041548	Hspb8	protein_coding	5	116408491	116422864	heat shock protein 8 [Source:MGI Symbol;Acc:MGI:2135756]	1.64957	0.620489	10.4842	0.00120401	0.0498228
279	ENSMUSG00000041598.7	ENSMUSG00000041598	Cdc42ep4	protein_coding	11	113726850	113751881	CDC42 effector protein (Rho GTPase binding) 4 [Source:MGI Symbol;Acc:MGI:1929760]	1.05979	3.7207	12.0145	0.000527896	0.0301786
280	ENSMUSG00000042042.14	ENSMUSG00000042042	Csgalnact2	protein_coding	6	118107452	118139140	chondroitin sulfate N-acetylgalactosaminyltransferase 2 [Source:MGI Symbol;Acc:MGI:1926002]	0.882554	6.05891	11.8284	0.000583354	0.0318278
281	ENSMUSG00000042249.11	ENSMUSG00000042249	Grk3	protein_coding	5	112910482	113015791	G protein-coupled receptor kinase 3 [Source:MGI Symbol;Acc:MGI:87941]	0.850763	6.21713	10.9231	0.000949716	0.0435856
282	ENSMUSG00000042268.10	ENSMUSG00000042268	Slc26a9	protein_coding	1	131744022	131771504	solute carrier family 26, member 9 [Source:MGI Symbol;Acc:MGI:2444594]	-3.14175	-0.270416	11.9519	0.00054592	0.0306713
283	ENSMUSG00000042453.14	ENSMUSG00000042453	Reln	protein_coding	5	21884454	22344702	reelin [Source:MGI Symbol;Acc:MGI:103022]	-1.81108	4.47558	15.1979	9.68112e-05	0.010758
284	ENSMUSG00000042659.15	ENSMUSG00000042659	Arrdc4	protein_coding	7	68736995	68749241	arrestin domain containing 4 [Source:MGI Symbol;Acc:MGI:1913662]	1.38075	4.50024	25.5273	4.36163e-07	0.000261433
285	ENSMUSG00000042671.12	ENSMUSG00000042671	Rgs8	protein_coding	1	153653025	153700323	regulator of G-protein signaling 8 [Source:MGI Symbol;Acc:MGI:108408]	-1.80555	2.67874	11.0962	0.000865052	0.0407398
286	ENSMUSG00000042757.16	ENSMUSG00000042757	Tmem108	protein_coding	9	103482947	103761837	transmembrane protein 108 [Source:MGI Symbol;Acc:MGI:1932411]	-1.80806	2.78286	18.7036	1.52691e-05	0.00309025
287	ENSMUSG00000043557.15	ENSMUSG00000043557	Mdga1	protein_coding	17	29827956	29970087	MAM domain containing glycosylphosphatidylinositol anchor 1 [Source:MGI Symbol;Acc:MGI:1922012]	0.946537	6.57345	15.409	8.65731e-05	0.0099364
288	ENSMUSG00000043587.15	ENSMUSG00000043587	Pxylp1	protein_coding	9	96823336	96892669	2-phosphoxylose phosphatase 1 [Source:MGI Symbol;Acc:MGI:2442444]	0.830508	5.09493	11.4323	0.000721772	0.0360521
289	ENSMUSG00000043740.15	ENSMUSG00000043740	B430306N03Rik	protein_coding	17	48316141	48327024	RIKEN cDNA B430306N03 gene [Source:MGI Symbol;Acc:MGI:2443478]	2.157	3.62755	11.5464	0.000678806	0.0347843
290	ENSMUSG00000043832.13	ENSMUSG00000043832	Clec4a3	protein_coding	6	122952515	122969875	C-type lectin domain family 4, member a3 [Source:MGI Symbol;Acc:MGI:1920399]	4.12903	1.28552	28.9668	7.36296e-08	8.09107e-05
291	ENSMUSG00000043939.15	ENSMUSG00000043939	A530064D06Rik	protein_coding	17	48149126	48167275	RIKEN cDNA A530064D06 gene [Source:MGI Symbol;Acc:MGI:2443476]	2.98487	1.93931	13.3364	0.000260305	0.0200344
292	ENSMUSG00000044052.3	ENSMUSG00000044052	Ccr10	protein_coding	11	101172997	101175443	chemokine (C-C motif) receptor 10 [Source:MGI Symbol;Acc:MGI:1096320]	-2.46421	1.6107	22.4546	2.15175e-06	0.000665025
293	ENSMUSG00000044092.8	ENSMUSG00000044092	C130050O18Rik	protein_coding	5	139405280	139415623	RIKEN cDNA C130050O18 gene [Source:MGI Symbol;Acc:MGI:2442694]	1.69863	1.37891	13.1735	0.000283939	0.0211936
294	ENSMUSG00000044447.5	ENSMUSG00000044447	Dock5	protein_coding	14	67752135	67933442	dedicator of cytokinesis 5 [Source:MGI Symbol;Acc:MGI:2652871]	0.996576	5.60806	15.0797	0.000103063	0.0112629
295	ENSMUSG00000044811.13	ENSMUSG00000044811	Cd300c2	protein_coding	11	114996721	115001880	CD300C molecule 2 [Source:MGI Symbol;Acc:MGI:2153249]	3.01951	1.22598	17.9652	2.24976e-05	0.00390354
296	ENSMUSG00000045551.7	ENSMUSG00000045551	Fpr1	protein_coding	17	17876471	17883940	formyl peptide receptor 1 [Source:MGI Symbol;Acc:MGI:107443]	3.10798	2.1319	11.6928	0.000627411	0.0334507
297	ENSMUSG00000045658.16	ENSMUSG00000045658	Pid1	protein_coding	1	84036296	84364180	phosphotyrosine interaction domain containing 1 [Source:MGI Symbol;Acc:MGI:2138391]	2.22766	1.1547	14.5877	0.000133786	0.0137113
298	ENSMUSG00000045763.8	ENSMUSG00000045763	Basp1	protein_coding	15	25363277	25413764	brain abundant, membrane attached signal protein 1 [Source:MGI Symbol;Acc:MGI:1917600]	-1.01188	5.54973	15.6734	7.52747e-05	0.00886269
299	ENSMUSG00000045954.7	ENSMUSG00000045954	Cavin2	protein_coding	1	51289126	51302960	caveolae associated 2 [Source:MGI Symbol;Acc:MGI:99513]	2.43304	3.7203	29.5034	5.58184e-08	6.90055e-05
300	ENSMUSG00000046159.16	ENSMUSG00000046159	Chrm3	protein_coding	13	9875486	10360847	cholinergic receptor, muscarinic 3, cardiac [Source:MGI Symbol;Acc:MGI:88398]	2.22301	0.776679	15.0853	0.000102762	0.0112629
301	ENSMUSG00000046245.13	ENSMUSG00000046245	Pilra	protein_coding	5	137821952	137836281	paired immunoglobin-like type 2 receptor alpha [Source:MGI Symbol;Acc:MGI:2450529]	3.1896	2.58495	11.916	0.000556534	0.0310235
302	ENSMUSG00000046480.6	ENSMUSG00000046480	Scn4b	protein_coding	9	45138395	45154152	sodium channel, type IV, beta [Source:MGI Symbol;Acc:MGI:2687406]	-2.20326	2.02602	11.8949	0.000562874	0.0311867
303	ENSMUSG00000046593.3	ENSMUSG00000046593	Tmem215	protein_coding	4	40472180	40477168	transmembrane protein 215 [Source:MGI Symbol;Acc:MGI:2444167]	2.94436	0.680133	14.462	0.000143013	0.0142151
304	ENSMUSG00000046598.15	ENSMUSG00000046598	Bdh1	protein_coding	16	31422280	31458901	3-hydroxybutyrate dehydrogenase, type 1 [Source:MGI Symbol;Acc:MGI:1919161]	-1.41462	3.09913	14.5005	0.000140122	0.014094
305	ENSMUSG00000047250.13	ENSMUSG00000047250	Ptgs1	protein_coding	2	36230426	36252272	prostaglandin-endoperoxide synthase 1 [Source:MGI Symbol;Acc:MGI:97797]	1.2601	5.40794	23.904	1.01263e-06	0.000417287
306	ENSMUSG00000047953.7	ENSMUSG00000047953	Gp5	protein_coding	16	30307685	30310779	glycoprotein 5 (platelet) [Source:MGI Symbol;Acc:MGI:1096363]	1.34454	3.11853	12.5562	0.000394897	0.0262479
307	ENSMUSG00000048376.6	ENSMUSG00000048376	F2r	protein_coding	13	95601803	95618487	coagulation factor II (thrombin) receptor [Source:MGI Symbol;Acc:MGI:101802]	1.56341	6.69796	20.8768	4.89797e-06	0.00134558
308	ENSMUSG00000048442.15	ENSMUSG00000048442	Smim5	protein_coding	11	115899966	115906269	small integral membrane protein 5 [Source:MGI Symbol;Acc:MGI:1913778]	1.079	4.16527	12.4331	0.000421793	0.0271282
309	ENSMUSG00000048498.7	ENSMUSG00000048498	Cd300e	protein_coding	11	115051917	115062177	CD300E molecule [Source:MGI Symbol;Acc:MGI:2387602]	5.40622	0.363283	31.5007	1.99372e-08	2.62905e-05
310	ENSMUSG00000048621.3	ENSMUSG00000048621	Gm6377	protein_coding	X	109196756	109200439	predicted gene 6377 [Source:MGI Symbol;Acc:MGI:3647255]	2.1444	0.622938	13.0272	0.000307007	0.022244
311	ENSMUSG00000049037.8	ENSMUSG00000049037	Clec4a1	protein_coding	6	122921848	122934619	C-type lectin domain family 4, member a1 [Source:MGI Symbol;Acc:MGI:3036291]	4.13418	1.26825	21.1323	4.28651e-06	0.00119419
312	ENSMUSG00000049115.15	ENSMUSG00000049115	Agtr1a	protein_coding	13	30336441	30382867	angiotensin II receptor, type 1a [Source:MGI Symbol;Acc:MGI:87964]	1.88138	0.256779	10.796	0.00101717	0.0455375
313	ENSMUSG00000049130.6	ENSMUSG00000049130	C5ar1	protein_coding	7	16246743	16259540	complement component 5a receptor 1 [Source:MGI Symbol;Acc:MGI:88232]	3.15386	2.80907	11.3399	0.000758576	0.037418
314	ENSMUSG00000049577.15	ENSMUSG00000049577	Zfpm1	protein_coding	8	122282141	122337251	zinc finger protein, multitype 1 [Source:MGI Symbol;Acc:MGI:1095400]	0.870827	7.25858	11.6175	0.000653339	0.0339188
315	ENSMUSG00000049971.17	ENSMUSG00000049971	Glt1d1	protein_coding	5	127632262	127709374	glycosyltransferase 1 domain containing 1 [Source:MGI Symbol;Acc:MGI:2442755]	2.17308	1.03623	12.6969	0.000366265	0.0251439
316	ENSMUSG00000049988.5	ENSMUSG00000049988	Lrrc25	protein_coding	8	70616155	70621483	leucine rich repeat containing 25 [Source:MGI Symbol;Acc:MGI:2445284]	2.29479	2.30707	15.9525	6.49518e-05	0.00808017
317	ENSMUSG00000049999.4	ENSMUSG00000049999	Ppp1r3d	protein_coding	2	178411206	178414472	protein phosphatase 1, regulatory subunit 3D [Source:MGI Symbol;Acc:MGI:1917664]	1.49498	3.04199	19.4129	1.05292e-05	0.00240152
318	ENSMUSG00000050064.14	ENSMUSG00000050064	Zfp697	protein_coding	3	98382461	98753812	zinc finger protein 697 [Source:MGI Symbol;Acc:MGI:2139736]	1.62755	1.09527	12.9764	0.000315444	0.022689
319	ENSMUSG00000050147.9	ENSMUSG00000050147	F2rl3	protein_coding	8	72761880	72763874	coagulation factor II (thrombin) receptor-like 3 [Source:MGI Symbol;Acc:MGI:1298207]	1.06634	4.60179	10.6864	0.00107927	0.0469186
320	ENSMUSG00000050335.17	ENSMUSG00000050335	Lgals3	protein_coding	14	47367751	47386160	lectin, galactose binding, soluble 3 [Source:MGI Symbol;Acc:MGI:96778]	2.2646	4.29678	12.2786	0.000458175	0.0277012
321	ENSMUSG00000050966.9	ENSMUSG00000050966	Lin28a	protein_coding	4	134003330	134018841	lin-28 homolog A (C. elegans) [Source:MGI Symbol;Acc:MGI:1890546]	3.42407	1.53554	12.0417	0.000520242	0.0299139
322	ENSMUSG00000051051.7	ENSMUSG00000051051	Olfr523	protein_coding	7	140173217	140178758	olfactory receptor 523 [Source:MGI Symbol;Acc:MGI:3030357]	-3.73517	-1.16584	15.5	8.25061e-05	0.00954369
323	ENSMUSG00000051397.5	ENSMUSG00000051397	Tacstd2	protein_coding	6	67534062	67535796	tumor-associated calcium signal transducer 2 [Source:MGI Symbol;Acc:MGI:1861606]	1.89578	3.31082	28.2679	1.05635e-07	0.000109972
324	ENSMUSG00000051439.6	ENSMUSG00000051439	Cd14	protein_coding	18	36725074	36726736	CD14 antigen [Source:MGI Symbol;Acc:MGI:88318]	1.98341	3.86163	11.8773	0.000568223	0.0313951
325	ENSMUSG00000051490.2	ENSMUSG00000051490	Foxd4	protein_coding	19	24898965	24901309	forkhead box D4 [Source:MGI Symbol;Acc:MGI:1347467]	2.91675	-0.80213	12.2894	0.000455537	0.0277012
326	ENSMUSG00000051682.15	ENSMUSG00000051682	Treml4	protein_coding	17	48264295	48275360	triggering receptor expressed on myeloid cells-like 4 [Source:MGI Symbol;Acc:MGI:1923239]	3.44338	1.48123	18.6985	1.53107e-05	0.00309025
327	ENSMUSG00000051748.2	ENSMUSG00000051748	Wfdc21	protein_coding	11	83746940	83752642	WAP four-disulfide core domain 21 [Source:MGI Symbol;Acc:MGI:1913357]	3.00545	4.0033	10.5704	0.00114915	0.0486353
328	ENSMUSG00000051910.13	ENSMUSG00000051910	Sox6	protein_coding	7	115470872	116038796	SRY (sex determining region Y)-box 6 [Source:MGI Symbol;Acc:MGI:98368]	1.32789	4.36762	12.8612	0.000335461	0.0236979
329	ENSMUSG00000052212.6	ENSMUSG00000052212	Cd177	protein_coding	7	24743983	24760311	CD177 antigen [Source:MGI Symbol;Acc:MGI:1916141]	3.33394	6.35134	14.1327	0.000170354	0.0155494
330	ENSMUSG00000052270.7	ENSMUSG00000052270	Fpr2	protein_coding	17	17887824	17893952	formyl peptide receptor 2 [Source:MGI Symbol;Acc:MGI:1278319]	3.26	2.81702	10.6153	0.00112155	0.0482265
331	ENSMUSG00000052396.7	ENSMUSG00000052396	Mogat2	protein_coding	7	99219084	99238619	monoacylglycerol O-acyltransferase 2 [Source:MGI Symbol;Acc:MGI:2663253]	3.2779	1.33448	13.6603	0.000219039	0.0176122
332	ENSMUSG00000052534.15	ENSMUSG00000052534	Pbx1	protein_coding	1	168119364	168432270	pre B cell leukemia homeobox 1 [Source:MGI Symbol;Acc:MGI:97495]	1.21669	6.35197	15.3134	9.10694e-05	0.0101959
333	ENSMUSG00000052560.15	ENSMUSG00000052560	Cpne8	protein_coding	15	90487482	90679432	copine VIII [Source:MGI Symbol;Acc:MGI:1914121]	1.60498	2.36476	13.4062	0.000250797	0.019378
334	ENSMUSG00000052749.9	ENSMUSG00000052749	Trim30b	protein_coding	7	104355382	104369884	tripartite motif-containing 30B [Source:MGI Symbol;Acc:MGI:4821256]	1.4857	4.24237	19.0607	1.26625e-05	0.00276325
335	ENSMUSG00000053101.3	ENSMUSG00000053101	Gpr141	protein_coding	13	19749682	19824257	G protein-coupled receptor 141 [Source:MGI Symbol;Acc:MGI:2672983]	2.82205	2.39247	14.4344	0.000145127	0.0142252
336	ENSMUSG00000053279.7	ENSMUSG00000053279	Aldh1a1	protein_coding	19	20492715	20643462	aldehyde dehydrogenase family 1, subfamily A1 [Source:MGI Symbol;Acc:MGI:1353450]	2.13299	5.01858	21.2329	4.06713e-06	0.00116591
337	ENSMUSG00000053338.9	ENSMUSG00000053338	Tarm1	protein_coding	7	3486500	3502624	T cell-interacting, activating receptor on myeloid cells 1 [Source:MGI Symbol;Acc:MGI:2442280]	4.63226	-0.204085	14.2488	0.000160159	0.0152305
338	ENSMUSG00000053414.8	ENSMUSG00000053414	Hunk	protein_coding	16	90386013	90499553	hormonally upregulated Neu-associated kinase [Source:MGI Symbol;Acc:MGI:1347352]	2.59539	-1.83167	11.6377	0.000646289	0.033819
339	ENSMUSG00000053819.16	ENSMUSG00000053819	Camk2d	protein_coding	3	126596302	126846326	calcium/calmodulin-dependent protein kinase II, delta [Source:MGI Symbol;Acc:MGI:1341265]	-0.788904	5.84453	12.2841	0.000456822	0.0277012
340	ENSMUSG00000053931.11	ENSMUSG00000053931	Cnn3	protein_coding	3	121426497	121458207	calponin 3, acidic [Source:MGI Symbol;Acc:MGI:1919244]	-1.60528	5.88781	18.9575	1.3366e-05	0.00281254
341	ENSMUSG00000054641.10	ENSMUSG00000054641	Mmrn1	protein_coding	6	60924976	60989378	multimerin 1 [Source:MGI Symbol;Acc:MGI:1918195]	1.156	5.94308	10.6702	0.00108873	0.0472259
342	ENSMUSG00000054672.13	ENSMUSG00000054672	5830411N06Rik	protein_coding	7	140247284	140300736	RIKEN cDNA 5830411N06 gene [Source:MGI Symbol;Acc:MGI:2443685]	-2.72308	2.08575	22.7246	1.86957e-06	0.000616334
343	ENSMUSG00000054889.10	ENSMUSG00000054889	Dsp	protein_coding	13	38151294	38198577	desmoplakin [Source:MGI Symbol;Acc:MGI:109611]	1.87008	0.668842	13.972	0.000185554	0.0162308
344	ENSMUSG00000055541.17	ENSMUSG00000055541	Lair1	protein_coding	7	4003402	4063204	leukocyte-associated Ig-like receptor 1 [Source:MGI Symbol;Acc:MGI:105492]	1.18855	4.65818	18.5957	1.61586e-05	0.00313094
345	ENSMUSG00000055546.6	ENSMUSG00000055546	Timd4	protein_coding	11	46810800	46844332	T cell immunoglobulin and mucin domain containing 4 [Source:MGI Symbol;Acc:MGI:2445125]	3.14283	-1.68628	13.9616	0.000186582	0.0162308
346	ENSMUSG00000055639.16	ENSMUSG00000055639	Dach1	protein_coding	14	97786853	98169765	dachshund family transcription factor 1 [Source:MGI Symbol;Acc:MGI:1277991]	1.2675	5.34473	13.1076	0.000294096	0.0215452
347	ENSMUSG00000056025.12	ENSMUSG00000056025	Clca3a1	protein_coding	3	144729677	144760977	chloride channel accessory 3A1 [Source:MGI Symbol;Acc:MGI:1316732]	2.67405	3.58377	26.5567	2.55916e-07	0.000180787
348	ENSMUSG00000056073.16	ENSMUSG00000056073	Grik2	protein_coding	10	49094833	49788766	glutamate receptor, ionotropic, kainate 2 (beta 2) [Source:MGI Symbol;Acc:MGI:95815]	-2.72172	-1.07426	21.3128	3.90111e-06	0.00113476
349	ENSMUSG00000056529.7	ENSMUSG00000056529	Ptafr	protein_coding	4	132564067	132582683	platelet-activating factor receptor [Source:MGI Symbol;Acc:MGI:106066]	1.28622	3.31519	11.1824	0.000825774	0.0395492
350	ENSMUSG00000056602.11	ENSMUSG00000056602	Fry	protein_coding	5	150118645	150497753	FRY microtubule binding protein [Source:MGI Symbol;Acc:MGI:2443895]	1.15081	4.67973	14.228	0.000161946	0.015262
351	ENSMUSG00000056973.6	ENSMUSG00000056973	Ces1d	protein_coding	8	93166068	93197838	carboxylesterase 1D [Source:MGI Symbol;Acc:MGI:2148202]	3.98264	-0.646602	10.6607	0.00109434	0.0473655
352	ENSMUSG00000057098.14	ENSMUSG00000057098	Ebf1	protein_coding	11	44617317	45008091	early B cell factor 1 [Source:MGI Symbol;Acc:MGI:95275]	-1.97266	4.8761	11.5181	0.000689231	0.034867
353	ENSMUSG00000057439.12	ENSMUSG00000057439	Kir3dl2	protein_coding	X	136448107	136544056	killer cell immunoglobulin-like receptor, three domains, long cytoplasmic tail, 2 [Source:MGI Symbol;Acc:MGI:3612791]	-3.93415	-1.76092	18.4316	1.76112e-05	0.00331761
354	ENSMUSG00000057606.14	ENSMUSG00000057606	Colq	protein_coding	14	31523082	31591343	collagen-like tail subunit (single strand of homotrimer) of asymmetric acetylcholinesterase [Source:MGI Symbol;Acc:MGI:1338761]	-1.82665	2.86889	16.3308	5.31928e-05	0.00706143
355	ENSMUSG00000057777.4	ENSMUSG00000057777	Mab21l2	protein_coding	3	86545581	86548629	mab-21-like 2 (C. elegans) [Source:MGI Symbol;Acc:MGI:1346022]	4.01576	-1.04219	23.3523	1.3488e-06	0.000530472
356	ENSMUSG00000058099.16	ENSMUSG00000058099	Nfam1	protein_coding	15	82992973	83033306	Nfat activating molecule with ITAM motif 1 [Source:MGI Symbol;Acc:MGI:1921289]	1.15649	6.35464	14.2674	0.000158584	0.0152238
357	ENSMUSG00000058624.12	ENSMUSG00000058624	Gda	protein_coding	19	21391307	21473445	guanine deaminase [Source:MGI Symbol;Acc:MGI:95678]	2.1678	5.26737	13.9565	0.000187089	0.0162308
358	ENSMUSG00000058626.16	ENSMUSG00000058626	Capn11	protein_coding	17	45630204	45659325	calpain 11 [Source:MGI Symbol;Acc:MGI:1352490]	-3.81132	-0.458864	12.3744	0.000435254	0.0272447
359	ENSMUSG00000058740.14	ENSMUSG00000058740	Kcnt1	protein_coding	2	25863734	25918273	potassium channel, subfamily T, member 1 [Source:MGI Symbol;Acc:MGI:1924627]	1.9606	0.352612	18.0823	2.11561e-05	0.00376998
360	ENSMUSG00000058818.13	ENSMUSG00000058818	Pirb	protein_coding	7	3711409	3720391	paired Ig-like receptor B [Source:MGI Symbol;Acc:MGI:894311]	2.28295	4.39094	12.7954	0.000347474	0.0241371
361	ENSMUSG00000059089.4	ENSMUSG00000059089	Fcgr4	protein_coding	1	171018920	171029761	Fc receptor, IgG, low affinity IV [Source:MGI Symbol;Acc:MGI:2179523]	4.65104	1.51954	18.5786	1.63037e-05	0.00313094
362	ENSMUSG00000059108.4	ENSMUSG00000059108	Ifitm6	protein_coding	7	141015699	141017924	interferon induced transmembrane protein 6 [Source:MGI Symbol;Acc:MGI:2686976]	3.30382	4.48426	13.8316	0.000199948	0.0169016
363	ENSMUSG00000059280.4	ENSMUSG00000059280	Vpreb2	protein_coding	16	17980428	17981273	pre-B lymphocyte gene 2 [Source:MGI Symbol;Acc:MGI:98937]	-2.7263	2.10611	11.3415	0.000757925	0.037418
364	ENSMUSG00000059900.14	ENSMUSG00000059900	Tmem40	protein_coding	6	115729131	115762410	transmembrane protein 40 [Source:MGI Symbol;Acc:MGI:2137870]	1.35092	5.1354	17.3889	3.04592e-05	0.00489824
365	ENSMUSG00000060063.9	ENSMUSG00000060063	Alox5ap	protein_coding	5	149264767	149288153	arachidonate 5-lipoxygenase activating protein [Source:MGI Symbol;Acc:MGI:107505]	1.19332	6.0139	19.899	8.16441e-06	0.0020442
366	ENSMUSG00000060206.11	ENSMUSG00000060206	Zfp462	protein_coding	4	54945048	55083563	zinc finger protein 462 [Source:MGI Symbol;Acc:MGI:107690]	2.32352	1.88454	17.3466	3.11461e-05	0.00496831
367	ENSMUSG00000060402.7	ENSMUSG00000060402	Chst8	protein_coding	7	34674468	34812711	carbohydrate (N-acetylgalactosamine 4-0) sulfotransferase 8 [Source:MGI Symbol;Acc:MGI:1916197]	6.16227	1.00069	24.6248	6.9649e-07	0.000328134
368	ENSMUSG00000060487.7	ENSMUSG00000060487	Samd5	protein_coding	10	9622936	9675208	sterile alpha motif domain containing 5 [Source:MGI Symbol;Acc:MGI:2444815]	2.26397	1.75827	13.008	0.000310161	0.0223904
369	ENSMUSG00000061068.7	ENSMUSG00000061068	Mcpt4	protein_coding	14	56059629	56062313	mast cell protease 4 [Source:MGI Symbol;Acc:MGI:96940]	5.83429	-2.83955	11.5324	0.000683927	0.0347843
370	ENSMUSG00000061086.12	ENSMUSG00000061086	Myl4	protein_coding	11	104550663	104595753	myosin, light polypeptide 4 [Source:MGI Symbol;Acc:MGI:97267]	-1.50717	4.00419	11.5272	0.000685838	0.0347843
371	ENSMUSG00000061132.13	ENSMUSG00000061132	Blnk	protein_coding	19	40928927	40994535	B cell linker [Source:MGI Symbol;Acc:MGI:96878]	-1.14785	6.48098	17.6151	2.70435e-05	0.00456251
372	ENSMUSG00000061311.6	ENSMUSG00000061311	Rag1	protein_coding	2	101638282	101649501	recombination activating gene 1 [Source:MGI Symbol;Acc:MGI:97848]	-1.89543	5.65381	10.8246	0.00100162	0.0454407
373	ENSMUSG00000062127.11	ENSMUSG00000062127	Cttnbp2nl	protein_coding	3	105001915	105053146	CTTNBP2 N-terminal like [Source:MGI Symbol;Acc:MGI:1933137]	1.60816	0.671242	13.49	0.000239834	0.018825
374	ENSMUSG00000062995.12	ENSMUSG00000062995	Ica1	protein_coding	6	8630527	8778488	islet cell autoantigen 1 [Source:MGI Symbol;Acc:MGI:96391]	1.18088	4.63152	16.3589	5.2409e-05	0.00700439
375	ENSMUSG00000063109.13	ENSMUSG00000063109	Dgkeos	antisense	11	89064729	89069098	diacylglycerol kinase, epsilon, opposite strand [Source:MGI Symbol;Acc:MGI:3041185]	-1.62939	0.313648	12.5287	0.000400751	0.0262479
376	ENSMUSG00000063193.8	ENSMUSG00000063193	Cd300lb	protein_coding	11	114922781	114934386	CD300 molecule like family member B [Source:MGI Symbol;Acc:MGI:2685099]	2.49953	3.23064	16.9489	3.83996e-05	0.00566824
377	ENSMUSG00000063234.5	ENSMUSG00000063234	Gpr84	protein_coding	15	103308235	103310612	G protein-coupled receptor 84 [Source:MGI Symbol;Acc:MGI:1934129]	2.26004	-0.201657	12.3999	0.000429366	0.0272447
378	ENSMUSG00000064246.10	ENSMUSG00000064246	Chil1	protein_coding	1	134182176	134190181	chitinase-like 1 [Source:MGI Symbol;Acc:MGI:1340899]	3.23053	4.73346	12.2506	0.000465103	0.0279627
379	ENSMUSG00000066684.10	ENSMUSG00000066684	Pilrb1	protein_coding	5	137852147	137858106	paired immunoglobin-like type 2 receptor beta 1 [Source:MGI Symbol;Acc:MGI:2450532]	3.35286	0.805214	10.577	0.00114504	0.0486353
380	ENSMUSG00000067614.5	ENSMUSG00000067614	Krt86	protein_coding	15	101473478	101479986	keratin 86 [Source:MGI Symbol;Acc:MGI:109362]	6.58731	-1.87389	11.9675	0.000541351	0.0306713
381	ENSMUSG00000067767.5	ENSMUSG00000067767	Clec4b2	protein_coding	6	123172893	123204671	C-type lectin domain family 4, member b2 [Source:MGI Symbol;Acc:MGI:3588267]	3.38613	-0.431865	13.1144	0.000293041	0.0215452
382	ENSMUSG00000068079.5	ENSMUSG00000068079	Tcf15	protein_coding	2	152143561	152149097	transcription factor 15 [Source:MGI Symbol;Acc:MGI:104664]	1.4167	1.72329	11.3763	0.000743852	0.0369683
383	ENSMUSG00000068245.14	ENSMUSG00000068245	Phf11d	protein_coding	14	59347407	59365470	PHD finger protein 11D [Source:MGI Symbol;Acc:MGI:1277133]	1.6776	1.36943	12.7937	0.000347779	0.0241371
384	ENSMUSG00000069515.6	ENSMUSG00000069515	Lyz1	protein_coding	10	117287797	117292868	lysozyme 1 [Source:MGI Symbol;Acc:MGI:96902]	3.32022	-1.51239	11.0681	0.000878266	0.0411661
385	ENSMUSG00000069516.8	ENSMUSG00000069516	Lyz2	protein_coding	10	117277331	117282321	lysozyme 2 [Source:MGI Symbol;Acc:MGI:96897]	2.61719	8.82976	13.7834	0.000205136	0.0169346
386	ENSMUSG00000069607.4	ENSMUSG00000069607	Cd300ld3	protein_coding	11	115042131	115048409	CD300 molecule like family member D3 [Source:MGI Symbol;Acc:MGI:2687214]	4.55353	-2.20272	12.863	0.000335138	0.0236979
387	ENSMUSG00000070348.5	ENSMUSG00000070348	Ccnd1	protein_coding	7	144929931	144939925	cyclin D1 [Source:MGI Symbol;Acc:MGI:88313]	0.998727	4.59454	13.7987	0.000203476	0.0169346
388	ENSMUSG00000070476.10	ENSMUSG00000070476	Fam217b	protein_coding	2	178414524	178424428	family with sequence similarity 217, member B [Source:MGI Symbol;Acc:MGI:1918782]	1.04606	3.77502	11.9719	0.000540085	0.0306713
389	ENSMUSG00000070576.4	ENSMUSG00000070576	Mn1	protein_coding	5	111417362	111457033	meningioma 1 [Source:MGI Symbol;Acc:MGI:1261813]	-1.29466	5.4761	12.6516	0.000375248	0.0255066
390	ENSMUSG00000070868.11	ENSMUSG00000070868	Skint3	protein_coding	4	112232245	112300468	selection and upkeep of intraepithelial T cells 3 [Source:MGI Symbol;Acc:MGI:3045331]	2.13401	-0.453919	12.7383	0.000358246	0.0247766
391	ENSMUSG00000070873.5	ENSMUSG00000070873	Lilra5	protein_coding	7	4237754	4243463	leukocyte immunoglobulin-like receptor, subfamily A (with TM domain), member 5 [Source:MGI Symbol;Acc:MGI:3647196]	4.21618	-0.605113	19.6394	9.35226e-06	0.00225595
392	ENSMUSG00000071203.6	ENSMUSG00000071203	Naip5	protein_coding	13	100211739	100246323	NLR family, apoptosis inhibitory protein 5 [Source:MGI Symbol;Acc:MGI:1298220]	1.1353	5.59394	26.0467	3.33266e-07	0.000219733
393	ENSMUSG00000071637.5	ENSMUSG00000071637	Cebpd	protein_coding	16	15887286	15891031	CCAAT/enhancer binding protein (C/EBP), delta [Source:MGI Symbol;Acc:MGI:103573]	2.04503	3.81403	15.0209	0.000106325	0.0114321
394	ENSMUSG00000071714.7	ENSMUSG00000071714	Csf2rb2	protein_coding	15	78282507	78305721	colony stimulating factor 2 receptor, beta 2, low-affinity (granulocyte-macrophage) [Source:MGI Symbol;Acc:MGI:1339760]	1.09839	4.57311	11.3017	0.000774366	0.0380073
395	ENSMUSG00000072769.6	ENSMUSG00000072769	Gm10419	lincRNA	5	108367769	108378239	predicted gene 10419 [Source:MGI Symbol;Acc:MGI:3642823]	1.95399	3.4906	29.2302	6.42699e-08	7.478e-05
396	ENSMUSG00000072875.2	ENSMUSG00000072875	Gpr27	protein_coding	6	99692679	99695066	G protein-coupled receptor 27 [Source:MGI Symbol;Acc:MGI:1202299]	2.69635	0.857192	11.032	0.000895507	0.0417763
397	ENSMUSG00000072949.6	ENSMUSG00000072949	Acot1	protein_coding	12	84009490	84018371	acyl-CoA thioesterase 1 [Source:MGI Symbol;Acc:MGI:1349396]	1.48943	3.70138	23.1988	1.4609e-06	0.000530472
398	ENSMUSG00000074259.10	ENSMUSG00000074259	Gramd2	protein_coding	9	59680144	59718874	GRAM domain containing 2 [Source:MGI Symbol;Acc:MGI:3528937]	3.08685	-0.281952	14.0349	0.000179453	0.0159891
399	ENSMUSG00000074272.10	ENSMUSG00000074272	Ceacam1	protein_coding	7	25461707	25477603	carcinoembryonic antigen-related cell adhesion molecule 1 [Source:MGI Symbol;Acc:MGI:1347245]	1.792	4.27081	14.0913	0.000174147	0.0155865
400	ENSMUSG00000074342.3	ENSMUSG00000074342	I830077J02Rik	protein_coding	3	105924358	105932664	RIKEN cDNA I830077J02 gene [Source:MGI Symbol;Acc:MGI:3588284]	1.4726	3.69763	13.688	0.000215827	0.0174247
401	ENSMUSG00000074417.9	ENSMUSG00000074417	Gm14548	protein_coding	7	3884242	3898120	predicted gene 14548 [Source:MGI Symbol;Acc:MGI:3709645]	2.87283	1.61398	18.9812	1.32015e-05	0.00280779
402	ENSMUSG00000074575.4	ENSMUSG00000074575	Kcng1	protein_coding	2	168260117	168281736	potassium voltage-gated channel, subfamily G, member 1 [Source:MGI Symbol;Acc:MGI:3616086]	-1.66533	4.24504	14.176	0.00016648	0.01546
403	ENSMUSG00000074785.5	ENSMUSG00000074785	Plxnc1	protein_coding	10	94790866	94944835	plexin C1 [Source:MGI Symbol;Acc:MGI:1890127]	0.912481	7.02516	10.7992	0.00101546	0.0455375
404	ENSMUSG00000075588.6	ENSMUSG00000075588	Hoxb2	protein_coding	11	96350525	96354012	homeobox B2 [Source:MGI Symbol;Acc:MGI:96183]	1.81278	0.104802	10.5546	0.00115899	0.0486353
405	ENSMUSG00000076523.2	ENSMUSG00000076523	Igkv15-103	IG_V_gene	6	68437440	68437925	immunoglobulin kappa chain variable 15-103 [Source:MGI Symbol;Acc:MGI:96513]	-2.48732	11.0719	11.3578	0.000751311	0.0372454
406	ENSMUSG00000076530.4	ENSMUSG00000076530	Igkv11-106	IG_V_pseudogene	6	68339527	68339995	immunoglobulin kappa variable 11-106 [Source:MGI Symbol;Acc:MGI:3648899]	-4.12422	-1.29558	12.5417	0.000397973	0.0262479
407	ENSMUSG00000076547.2	ENSMUSG00000076547	Igkv4-70	IG_V_gene	6	69267888	69268443	immunoglobulin kappa chain variable 4-70 [Source:MGI Symbol;Acc:MGI:2686348]	-2.97811	6.97815	19.019	1.29424e-05	0.00278262
408	ENSMUSG00000076578.3	ENSMUSG00000076578	Igkv6-29	IG_V_gene	6	70138462	70139110	immunoglobulin kappa chain variable 6-29 [Source:MGI Symbol;Acc:MGI:4439616]	-3.56243	-1.46735	22.6583	1.93527e-06	0.000627535
409	ENSMUSG00000076653.4	ENSMUSG00000076653	Ighv7-2	IG_V_gene	12	113912025	113912483	immunoglobulin heavy variable 7-2 [Source:MGI Symbol;Acc:MGI:4439623]	-1.85212	-1.60324	10.5491	0.00116244	0.0486353
410	ENSMUSG00000076665.4	ENSMUSG00000076665	Ighv7-1	IG_V_gene	12	113896408	113896946	immunoglobulin heavy variable 7-1 [Source:MGI Symbol;Acc:MGI:4439622]	-3.06777	10.5374	25.4146	4.62402e-07	0.00026682
411	ENSMUSG00000076670.4	ENSMUSG00000076670	Ighv3-5	IG_V_gene	12	114262652	114263087	immunoglobulin heavy variable 3-5 [Source:MGI Symbol;Acc:MGI:3648045]	-4.31237	1.95824	13.1082	0.000294001	0.0215452
412	ENSMUSG00000076672.7	ENSMUSG00000076672	Ighv3-6	IG_V_gene	12	114288152	114288582	immunoglobulin heavy variable 3-6 [Source:MGI Symbol;Acc:MGI:4439856]	-3.18283	3.48503	12.6365	0.000378278	0.0256245
413	ENSMUSG00000076695.7	ENSMUSG00000076695	Ighv1-18	IG_V_gene	12	114682632	114683065	immunoglobulin heavy variable V1-18 [Source:MGI Symbol;Acc:MGI:4439780]	-2.39596	5.22161	24.422	7.73793e-07	0.000340125
414	ENSMUSG00000078122.4	ENSMUSG00000078122	F630028O10Rik	antisense	X	96239926	96243636	RIKEN cDNA F630028O10 gene [Source:MGI Symbol;Acc:MGI:3641813]	2.02918	3.49765	10.7154	0.00106249	0.0463929
415	ENSMUSG00000078452.10	ENSMUSG00000078452	Raet1d	protein_coding	10	22360552	22374139	retinoic acid early transcript delta [Source:MGI Symbol;Acc:MGI:1861032]	-2.4139	-1.20566	14.4972	0.00014037	0.014094
416	ENSMUSG00000078612.9	ENSMUSG00000078612	Fyb2	protein_coding	4	104913456	105016863	FYN binding protein 2 [Source:MGI Symbol;Acc:MGI:2685466]	2.83424	2.97702	15.8572	6.83065e-05	0.00834013
417	ENSMUSG00000078771.10	ENSMUSG00000078771	Evi2a	protein_coding	11	79526560	79530609	ecotropic viral integration site 2a [Source:MGI Symbol;Acc:MGI:95458]	-1.03023	4.73532	11.9099	0.000558361	0.0310235
418	ENSMUSG00000078963.2	ENSMUSG00000078963	Hsbp1l1	protein_coding	18	80229758	80247102	heat shock factor binding protein 1-like 1 [Source:MGI Symbol;Acc:MGI:1913505]	2.19006	-1.28871	10.6286	0.00111351	0.0480323
419	ENSMUSG00000079157.4	ENSMUSG00000079157	Fam155a	protein_coding	8	9205902	9771161	family with sequence similarity 155, member A [Source:MGI Symbol;Acc:MGI:2142765]	-4.26098	-2.09676	17.2165	3.3352e-05	0.00515561
420	ENSMUSG00000079164.8	ENSMUSG00000079164	Tlr5	protein_coding	1	182954788	182976044	toll-like receptor 5 [Source:MGI Symbol;Acc:MGI:1858171]	2.37249	0.246678	13.7968	0.000203679	0.0169346
421	ENSMUSG00000079481.11	ENSMUSG00000079481	Nhsl2	protein_coding	X	101849385	102092055	NHS-like 2 [Source:MGI Symbol;Acc:MGI:3645090]	2.17992	4.27195	16.1224	5.93766e-05	0.00762642
422	ENSMUSG00000079547.3	ENSMUSG00000079547	H2-DMb1	protein_coding	17	34153072	34160230	histocompatibility 2, class II, locus Mb1 [Source:MGI Symbol;Acc:MGI:95922]	1.20512	3.9219	11.6711	0.000634797	0.033663
423	ENSMUSG00000079606.1	ENSMUSG00000079606	Gm595	protein_coding	X	48841466	48877713	predicted gene 595 [Source:MGI Symbol;Acc:MGI:2685441]	-3.92833	-1.69689	17.3272	3.14643e-05	0.00497891
424	ENSMUSG00000080917.2	ENSMUSG00000080917	Gm15925	unprocessed_pseudogene	7	3788883	3799631	predicted gene 15925 [Source:MGI Symbol;Acc:MGI:3801830]	3.33633	-2.36849	12.5662	0.000392793	0.0262479
425	ENSMUSG00000081665.2	ENSMUSG00000081665	Gm15922	polymorphic_pseudogene	7	3731630	3739889	predicted gene 15922 [Source:MGI Symbol;Acc:MGI:3802148]	2.60784	-0.174118	14.8708	0.000115129	0.0121778
426	ENSMUSG00000081723.1	ENSMUSG00000081723	Gm15931	unprocessed_pseudogene	7	4274189	4282645	predicted gene 15931 [Source:MGI Symbol;Acc:MGI:3805553]	2.55185	-0.120251	14.803	0.000119348	0.012557
427	ENSMUSG00000085786.1	ENSMUSG00000085786	Gm15987	antisense	6	128951204	128975029	predicted gene 15987 [Source:MGI Symbol;Acc:MGI:3801849]	2.1337	0.564227	11.83	0.000582827	0.0318278
428	ENSMUSG00000085890.7	ENSMUSG00000085890	Tnfsf13os	antisense	11	69682138	69691141	tumor necrosis factor (ligand) superfamily, member 13, opposite strand [Source:MGI Symbol;Acc:MGI:1919587]	1.66558	1.12699	12.3079	0.000451039	0.0277012
429	ENSMUSG00000086179.1	ENSMUSG00000086179	Gm14317	lincRNA	2	164550530	164559730	predicted gene 14317 [Source:MGI Symbol;Acc:MGI:3651690]	2.35716	-1.32379	11.1634	0.000834262	0.0396676
430	ENSMUSG00000086236.9	ENSMUSG00000086236	5830418P13Rik	antisense	9	103423578	103461260	RIKEN cDNA 5830418P13 gene [Source:MGI Symbol;Acc:MGI:3604110]	-1.4713	3.04482	20.5031	5.95335e-06	0.0015701
431	ENSMUSG00000087187.1	ENSMUSG00000087187	Gm13431	lincRNA	2	36216777	36222934	predicted gene 13431 [Source:MGI Symbol;Acc:MGI:3650776]	2.30128	0.613967	17.627	2.68753e-05	0.00456251
432	ENSMUSG00000089942.9	ENSMUSG00000089942	Pira2	protein_coding	7	3836812	3845051	paired-Ig-like receptor A2 [Source:MGI Symbol;Acc:MGI:1195970]	3.08577	-0.630326	13.1385	0.000289282	0.0215113
433	ENSMUSG00000090214.8	ENSMUSG00000090214	Gm15657	antisense	16	33770430	33796874	predicted gene 15657 [Source:MGI Symbol;Acc:MGI:3783100]	1.70523	2.3387	13.3225	0.000262237	0.0201048
434	ENSMUSG00000091712.2	ENSMUSG00000091712	Sec14l5	protein_coding	16	5147109	5187271	SEC14-like lipid binding 5 [Source:MGI Symbol;Acc:MGI:3616084]	-2.15789	1.7914	12.2307	0.000470098	0.0281504
435	ENSMUSG00000092572.7	ENSMUSG00000092572	Serpinb10	polymorphic_pseudogene	1	107529003	107549271	serine (or cysteine) peptidase inhibitor, clade B (ovalbumin), member 10 [Source:MGI Symbol;Acc:MGI:2138648]	3.0292	1.92613	18.7075	1.52383e-05	0.00309025
436	ENSMUSG00000094028.1	ENSMUSG00000094028	Ighd4-1	IG_D_gene	12	113430528	113430538	immunoglobulin heavy diversity 4-1 [Source:MGI Symbol;Acc:MGI:4439801]	-1.79415	-0.315006	11.826	0.0005841	0.0318278
437	ENSMUSG00000094164.2	ENSMUSG00000094164	Ighv2-3	IG_V_gene	12	113611187	113611617	immunoglobulin heavy variable 2-3 [Source:MGI Symbol;Acc:MGI:4439872]	-3.2545	6.42753	10.7606	0.00103684	0.0459834
438	ENSMUSG00000094504.3	ENSMUSG00000094504	Gm5294	protein_coding	5	138820080	138821619	predicted gene 5294 [Source:MGI Symbol;Acc:MGI:3646467]	2.86681	-2.11509	10.5417	0.00116708	0.0487024
439	ENSMUSG00000094940.1	ENSMUSG00000094940	Ighv1-84	IG_V_gene	12	115980702	115981134	immunoglobulin heavy variable 1-84 [Source:MGI Symbol;Acc:MGI:3644235]	-2.59518	6.65719	12.1477	0.000491476	0.0290191
440	ENSMUSG00000095115.2	ENSMUSG00000095115	Itpripl2	protein_coding	7	118485111	118491975	inositol 1,4,5-triphosphate receptor interacting protein-like 2 [Source:MGI Symbol;Acc:MGI:2442416]	1.26586	4.78707	18.1218	2.07217e-05	0.00372613
441	ENSMUSG00000095134.2	ENSMUSG00000095134	Mid1-ps1	unprocessed_pseudogene	Y	90753057	90763485	midline 1, pseudogene 1 [Source:MGI Symbol;Acc:MGI:5780070]	-1.92334	-0.194116	10.5745	0.00114658	0.0486353
442	ENSMUSG00000095197.6	ENSMUSG00000095197	Ighv1-59	IG_V_gene	12	115335082	115335514	immunoglobulin heavy variable V1-59 [Source:MGI Symbol;Acc:MGI:3644474]	-6.22532	5.03681	19.2991	1.1176e-05	0.00251207
443	ENSMUSG00000095204.6	ENSMUSG00000095204	Ighv1-52	IG_V_gene	12	115145487	115145919	immunoglobulin heavy variable 1-52 [Source:MGI Symbol;Acc:MGI:4439752]	-2.27886	4.22331	31.7808	1.72591e-08	2.57372e-05
444	ENSMUSG00000095519.2	ENSMUSG00000095519	Ighv1-66	IG_V_gene	12	115593110	115593591	immunoglobulin heavy variable 1-66 [Source:MGI Symbol;Acc:MGI:4439825]	-2.86378	4.55197	11.6644	0.000637078	0.0336936
445	ENSMUSG00000095609.2	ENSMUSG00000095609	Gm21188	protein_coding	13	120034605	120052194	predicted gene, 21188 [Source:MGI Symbol;Acc:MGI:5434543]	2.97299	0.259097	11.7499	0.000608479	0.0327973
446	ENSMUSG00000095633.2	ENSMUSG00000095633	Igkv4-58	IG_V_gene	6	69500254	69500786	immunoglobulin kappa variable 4-58 [Source:MGI Symbol;Acc:MGI:2685923]	-4.38906	5.10754	11.2873	0.000780375	0.0382075
447	ENSMUSG00000095788.6	ENSMUSG00000095788	Sirpb1a	protein_coding	3	15371653	15426520	signal-regulatory protein beta 1A [Source:MGI Symbol;Acc:MGI:2444824]	3.99231	-0.668912	12.3851	0.000432771	0.0272447
448	ENSMUSG00000096355.2	ENSMUSG00000096355	Ighv8-4	IG_V_gene	12	115024026	115024459	immunoglobulin heavy variable V8-4 [Source:MGI Symbol;Acc:MGI:3646040]	-5.86855	-0.939595	15.3196	9.07675e-05	0.0101959
449	ENSMUSG00000096490.1	ENSMUSG00000096490	Igkv10-94	IG_V_gene	6	68704508	68704978	immunoglobulin kappa variable 10-94 [Source:MGI Symbol;Acc:MGI:3646140]	-1.96017	6.49739	11.2645	0.000790016	0.038489
450	ENSMUSG00000096498.3	ENSMUSG00000096498	Ighv2-5	IG_V_gene	12	113685482	113686045	immunoglobulin heavy variable 2-5 [Source:MGI Symbol;Acc:MGI:4439517]	-3.57826	5.39381	11.136	0.000846661	0.0400645
451	ENSMUSG00000096824.2	ENSMUSG00000096824	Ighv2-7	IG_V_gene	12	113807314	113807752	immunoglobulin heavy variable 2-7 [Source:MGI Symbol;Acc:MGI:4439521]	-3.22336	4.44721	27.279	1.76115e-07	0.000139342
452	ENSMUSG00000097378.8	ENSMUSG00000097378	B230208H11Rik	lincRNA	10	12916648	12923090	RIKEN cDNA B230208H11 gene [Source:MGI Symbol;Acc:MGI:2443719]	2.14882	1.82977	12.3515	0.000440622	0.0274072
453	ENSMUSG00000097462.7	ENSMUSG00000097462	9530026P05Rik	antisense	6	92940329	93272979	RIKEN cDNA 9530026P05 gene [Source:MGI Symbol;Acc:MGI:1924659]	2.15236	-1.05038	10.7816	0.00102511	0.0456881
454	ENSMUSG00000097585.2	ENSMUSG00000097585	E230029C05Rik	processed_transcript	7	89980723	90049069	RIKEN cDNA E230029C05 gene [Source:MGI Symbol;Acc:MGI:2442580]	1.79332	-0.43055	10.737	0.00105012	0.046147
455	ENSMUSG00000098197.1	ENSMUSG00000098197	BC051537	antisense	17	34083843	34095309	cDNA sequence BC051537 [Source:MGI Symbol;Acc:MGI:3041255]	1.69605	2.24312	14.7687	0.000121533	0.0127192
456	ENSMUSG00000100459.6	ENSMUSG00000100459	Gm5833	lincRNA	1	138640095	138682077	predicted gene 5833 [Source:MGI Symbol;Acc:MGI:3779530]	2.61924	0.483504	16.7794	4.19866e-05	0.00600129
457	ENSMUSG00000101389.1	ENSMUSG00000101389	Ms4a4a	protein_coding	19	11375523	11392790	membrane-spanning 4-domains, subfamily A, member 4A [Source:MGI Symbol;Acc:MGI:3643932]	4.21722	-0.260288	24.4745	7.52988e-07	0.000340125
458	ENSMUSG00000102332.1	ENSMUSG00000102332	Gm19331	lincRNA	12	115386846	115397688	predicted gene, 19331 [Source:MGI Symbol;Acc:MGI:5011516]	-1.9256	0.540132	11.1993	0.000818293	0.0393816
459	ENSMUSG00000102524.1	ENSMUSG00000102524	Ighv1-2	IG_V_pseudogene	12	114469075	114469535	immunoglobulin heavy variable 1-2 [Source:MGI Symbol;Acc:MGI:4439924]	-2.52704	0.667945	18.315	1.87225e-05	0.00346104
460	ENSMUSG00000103033.1	ENSMUSG00000103033	Ighv5-12-4	IG_V_gene	12	113762249	113762708	immunoglobulin heavy variable 5-12-4 [Source:MGI Symbol;Acc:MGI:3645977]	-2.45315	2.32447	13.7669	0.00020695	0.0169854
461	ENSMUSG00000103168.1	ENSMUSG00000103168	Gm30948	lincRNA	12	115262684	115287908	predicted gene, 30948 [Source:MGI Symbol;Acc:MGI:5590107]	-2.0529	1.83266	10.6963	0.00107352	0.0467715
462	ENSMUSG00000103395.1	ENSMUSG00000103395	Ighv1-27	IG_V_pseudogene	12	114804616	114805041	immunoglobulin heavy variable V1-27 [Source:MGI Symbol;Acc:MGI:5009908]	-1.81649	0.652913	11.2409	0.000800127	0.0386956
463	ENSMUSG00000103586.5	ENSMUSG00000103586	5830405F06Rik	lincRNA	6	41055883	41063102	RIKEN cDNA 5830405F06 gene [Source:MGI Symbol;Acc:MGI:1923265]	-2.15955	-0.545012	12.3652	0.000437409	0.0272932
464	ENSMUSG00000104554.1	ENSMUSG00000104554	Gm4610	antisense	3	122377097	122391811	predicted gene 4610 [Source:MGI Symbol;Acc:MGI:3782793]	-1.98785	0.718677	11.1944	0.000820459	0.03939
465	ENSMUSG00000105363.1	ENSMUSG00000105363	Igkv11-114	IG_V_pseudogene	6	68164457	68164923	immunoglobulin kappa chain variable [Source:MGI Symbol;Acc:MGI:5009877]	-6.44486	0.649662	24.2152	8.6148e-07	0.000370436
466	ENSMUSG00000105652.1	ENSMUSG00000105652	4930519L02Rik	lincRNA	3	143017660	143040752	RIKEN cDNA 4930519L02 gene [Source:MGI Symbol;Acc:MGI:1922335]	1.36892	3.25458	11.9703	0.000540547	0.0306713
467	ENSMUSG00000105867.2	ENSMUSG00000105867	Gm42517	protein_coding	5	108366073	108367922	predicted gene 42517 [Source:MGI Symbol;Acc:MGI:5662654]	2.31979	2.48788	27.4276	1.63085e-07	0.000134409
468	ENSMUSG00000106601.1	ENSMUSG00000106601	Ighv1-70	IG_V_pseudogene	12	115691889	115692322	immunoglobulin heavy variable 1-70 [Source:MGI Symbol;Acc:MGI:3644620]	-2.39428	7.86159	10.8182	0.00100509	0.0454934
469	ENSMUSG00000107317.1	ENSMUSG00000107317	Gm19719	antisense	5	149282752	149287868	predicted gene, 19719 [Source:MGI Symbol;Acc:MGI:5011904]	1.5361	1.74398	12.3214	0.000447794	0.027593
470	ENSMUSG00000107849.1	ENSMUSG00000107849	Gm43904	lincRNA	6	87776143	87777480	predicted gene, 43904 [Source:MGI Symbol;Acc:MGI:5690296]	2.48426	-0.185506	18.014	2.19291e-05	0.00383856
471	ENSMUSG00000109245.1	ENSMUSG00000109245	Gm44860	TEC	7	90030571	90032916	predicted gene 44860 [Source:MGI Symbol;Acc:MGI:5753436]	3.83946	-2.60198	12.9045	0.000327795	0.023492
472	ENSMUSG00000112023.1	ENSMUSG00000112023	Lilr4b	protein_coding	10	51480632	51486703	leukocyte immunoglobulin-like receptor, subfamily B, member 4B [Source:MGI Symbol;Acc:MGI:102702]	2.31758	5.01334	11.554	0.000676027	0.0347843
473	ENSMUSG00000112148.1	ENSMUSG00000112148	Lilrb4a	protein_coding	10	51490956	51496611	leukocyte immunoglobulin-like receptor, subfamily B, member 4A [Source:MGI Symbol;Acc:MGI:102701]	2.19106	4.1517	10.5504	0.00116165	0.0486353
474	ENSMUSG00000113535.1	ENSMUSG00000113535	AU015791	lincRNA	12	105513480	105515246	expressed sequence AU015791 [Source:MGI Symbol;Acc:MGI:2144938]	-2.76369	2.14419	15.6053	7.80336e-05	0.00913316
475	ENSMUSG00000114608.1	ENSMUSG00000114608	Gm36161	lincRNA	13	120010390	120018931	predicted gene, 36161 [Source:MGI Symbol;Acc:MGI:5595320]	3.17667	-0.478842	12.3436	0.000442507	0.0274382
476	ENSMUSG00000115919.1	ENSMUSG00000115919	Gm31583	lincRNA	16	24085083	24090089	predicted gene, 31583 [Source:MGI Symbol;Acc:MGI:5590742]	4.42189	-1.42204	13.7471	0.000209149	0.0170775
477	ENSMUSG00000116114.1	ENSMUSG00000116114	Gm35853	antisense	15	101322888	101405834	predicted gene, 35853 [Source:MGI Symbol;Acc:MGI:5595012]	2.05623	1.20627	18.3734	1.81576e-05	0.00338827
478	ENSMUSG00000117315.1	ENSMUSG00000117315	AC154218.2	lincRNA	17	71144538	71181987	novel transcript	-1.99995	-0.304863	11.5513	0.00067701	0.0347843

## Sheet: 4. LSK cells.2
Bone Marrow-Derived LSK cells from 'F1-Lupus vs B6-Old Female Mice' (|FC|1.5, FDR<0.05)
	Gene.stable.ID.version	Gene.stable.ID	Gene.name	Gene.type	Chromosome/scaffold.name	Gene.start.(bp)	Gene.end.(bp)	Gene.description	logFC	logCPM	LR	PValue	FDR
1	ENSMUSG00000000184.12	ENSMUSG00000000184	Ccnd2	protein_coding	6	127125162	127152193	cyclin D2 [Source:MGI Symbol;Acc:MGI:88314]	0.912714	8.05219	8.08977	0.00445158	0.0341024
2	ENSMUSG00000000253.13	ENSMUSG00000000253	Gmpr	protein_coding	13	45507444	45553800	guanosine monophosphate reductase [Source:MGI Symbol;Acc:MGI:1913605]	-1.08765	3.77227	11.4696	0.000707444	0.00759265
3	ENSMUSG00000000278.10	ENSMUSG00000000278	Scpep1	protein_coding	11	88924020	88955465	serine carboxypeptidase 1 [Source:MGI Symbol;Acc:MGI:1921867]	1.08446	5.80762	15.2589	9.37339e-05	0.00133964
4	ENSMUSG00000000290.13	ENSMUSG00000000290	Itgb2	protein_coding	10	77530252	77565708	integrin beta 2 [Source:MGI Symbol;Acc:MGI:96611]	1.4928	7.18343	11.8883	0.000564881	0.00624559
5	ENSMUSG00000000308.14	ENSMUSG00000000308	Ckmt1	protein_coding	2	121357714	121363737	creatine kinase, mitochondrial 1, ubiquitous [Source:MGI Symbol;Acc:MGI:99441]	-5.06128	-1.77344	12.8318	0.000340772	0.00406542
6	ENSMUSG00000000365.9	ENSMUSG00000000365	Rnf17	protein_coding	14	56402581	56525032	ring finger protein 17 [Source:MGI Symbol;Acc:MGI:1353419]	-2.10649	1.12492	17.9541	2.26295e-05	0.000385873
7	ENSMUSG00000000416.16	ENSMUSG00000000416	Cttnbp2	protein_coding	6	18366478	18514843	cortactin binding protein 2 [Source:MGI Symbol;Acc:MGI:1353467]	4.49177	-0.52545	42.0505	8.89467e-11	4.47676e-09
8	ENSMUSG00000000489.7	ENSMUSG00000000489	Pdgfb	protein_coding	15	79995874	80014977	platelet derived growth factor, B polypeptide [Source:MGI Symbol;Acc:MGI:97528]	1.56146	3.2493	22.4208	2.18991e-06	4.9088e-05
9	ENSMUSG00000000532.11	ENSMUSG00000000532	Acvr1b	protein_coding	15	101174067	101213684	activin A receptor, type 1B [Source:MGI Symbol;Acc:MGI:1338944]	-0.940926	5.82923	13.2573	0.000271525	0.00334003
10	ENSMUSG00000000561.14	ENSMUSG00000000561	Wdr77	protein_coding	3	105959369	105970037	WD repeat domain 77 [Source:MGI Symbol;Acc:MGI:1917715]	-0.628276	5.55312	8.8273	0.00296757	0.0247777
11	ENSMUSG00000000594.7	ENSMUSG00000000594	Gm2a	protein_coding	11	55098115	55113029	GM2 ganglioside activator protein [Source:MGI Symbol;Acc:MGI:95762]	-1.39345	6.55418	26.361	2.83203e-07	7.70531e-06
12	ENSMUSG00000000617.14	ENSMUSG00000000617	Grm6	protein_coding	11	50850685	50866208	glutamate receptor, metabotropic 6 [Source:MGI Symbol;Acc:MGI:1351343]	2.48362	-0.65639	18.7766	1.46955e-05	0.000264253
13	ENSMUSG00000000628.10	ENSMUSG00000000628	Hk2	protein_coding	6	82725025	82774454	hexokinase 2 [Source:MGI Symbol;Acc:MGI:1315197]	-0.727169	5.77286	10.6239	0.00111636	0.0110907
14	ENSMUSG00000000738.18	ENSMUSG00000000738	Spg7	protein_coding	8	123062942	123097760	SPG7, paraplegin matrix AAA peptidase subunit [Source:MGI Symbol;Acc:MGI:2385906]	-0.597684	6.26657	7.75624	0.00535273	0.0393449
15	ENSMUSG00000000739.14	ENSMUSG00000000739	Sult5a1	protein_coding	8	123140192	123158315	sulfotransferase family 5A, member 1 [Source:MGI Symbol;Acc:MGI:1931463]	2.13276	-1.11012	12.8654	0.00033472	0.00399805
16	ENSMUSG00000000759.14	ENSMUSG00000000759	Tubgcp3	protein_coding	8	12614277	12672248	tubulin, gamma complex associated protein 3 [Source:MGI Symbol;Acc:MGI:2183752]	-0.646127	6.39228	10.2419	0.00137285	0.0131437
17	ENSMUSG00000000782.15	ENSMUSG00000000782	Tcf7	protein_coding	11	52252371	52283014	transcription factor 7, T cell specific [Source:MGI Symbol;Acc:MGI:98507]	1.98649	5.7393	37.5885	8.73579e-10	3.82287e-08
18	ENSMUSG00000000817.10	ENSMUSG00000000817	Fasl	protein_coding	1	161780689	161788495	Fas ligand (TNF superfamily, member 6) [Source:MGI Symbol;Acc:MGI:99255]	3.27973	2.01817	38.4089	5.73704e-10	2.57321e-08
19	ENSMUSG00000000948.16	ENSMUSG00000000948	Gm38393	protein_coding	7	59974149	60005064	predicted gene, 38393 [Source:MGI Symbol;Acc:MGI:5613898]	2.24914	0.309866	16.5367	4.77179e-05	0.000742612
20	ENSMUSG00000000958.10	ENSMUSG00000000958	Slc7a7	protein_coding	14	54369442	54417780	solute carrier family 7 (cationic amino acid transporter, y+ system), member 7 [Source:MGI Symbol;Acc:MGI:1337120]	1.44209	4.40705	20.9555	4.70069e-06	9.51684e-05
21	ENSMUSG00000000983.13	ENSMUSG00000000983	Wfdc18	protein_coding	11	83709015	83711348	WAP four-disulfide core domain 18 [Source:MGI Symbol;Acc:MGI:107506]	-1.86997	0.60455	10.5864	0.0011392	0.0112837
22	ENSMUSG00000001029.15	ENSMUSG00000001029	Icam2	protein_coding	11	106377656	106388075	intercellular adhesion molecule 2 [Source:MGI Symbol;Acc:MGI:96394]	-0.907302	5.26961	13.1517	0.000287257	0.00350089
23	ENSMUSG00000001036.17	ENSMUSG00000001036	Epn2	protein_coding	11	61517249	61579687	epsin 2 [Source:MGI Symbol;Acc:MGI:1333766]	2.68089	1.24991	22.8854	1.71953e-06	3.96876e-05
24	ENSMUSG00000001056.3	ENSMUSG00000001056	Nhp2	protein_coding	11	51619735	51623714	NHP2 ribonucleoprotein [Source:MGI Symbol;Acc:MGI:1098547]	-0.746924	5.92355	7.26435	0.00703368	0.0487307
25	ENSMUSG00000001211.15	ENSMUSG00000001211	Agpat3	protein_coding	10	78269178	78352489	1-acylglycerol-3-phosphate O-acyltransferase 3 [Source:MGI Symbol;Acc:MGI:1336186]	0.616869	6.14274	8.16365	0.00427383	0.0331256
26	ENSMUSG00000001300.16	ENSMUSG00000001300	Efnb2	protein_coding	8	8617434	8661242	ephrin B2 [Source:MGI Symbol;Acc:MGI:105097]	1.51494	2.47445	17.7127	2.56901e-05	0.000429907
27	ENSMUSG00000001348.15	ENSMUSG00000001348	Acp5	protein_coding	9	22126727	22135711	acid phosphatase 5, tartrate resistant [Source:MGI Symbol;Acc:MGI:87883]	2.10258	4.49702	21.3341	3.85805e-06	7.95748e-05
28	ENSMUSG00000001444.2	ENSMUSG00000001444	Tbx21	protein_coding	11	97098071	97115331	T-box 21 [Source:MGI Symbol;Acc:MGI:1888984]	2.73974	3.62431	28.3858	9.93905e-08	2.95631e-06
29	ENSMUSG00000001467.5	ENSMUSG00000001467	Cyp51	protein_coding	5	4081145	4104746	cytochrome P450, family 51 [Source:MGI Symbol;Acc:MGI:106040]	-0.850313	5.20232	14.181	0.000166039	0.00218805
30	ENSMUSG00000001542.7	ENSMUSG00000001542	Ell2	protein_coding	13	75706757	75772364	elongation factor RNA polymerase II 2 [Source:MGI Symbol;Acc:MGI:2183438]	2.55869	6.71844	44.3812	2.70272e-11	1.48499e-09
31	ENSMUSG00000001622.15	ENSMUSG00000001622	Csn3	protein_coding	5	87925579	87932665	casein kappa [Source:MGI Symbol;Acc:MGI:107461]	5.41536	-1.82829	32.0262	1.52108e-08	5.27776e-07
32	ENSMUSG00000001672.14	ENSMUSG00000001672	Marveld3	protein_coding	8	109947914	109962203	MARVEL (membrane-associating) domain containing 3 [Source:MGI Symbol;Acc:MGI:1920858]	2.65547	-0.574657	16.0428	6.19269e-05	0.000927966
33	ENSMUSG00000001870.15	ENSMUSG00000001870	Ltbp1	protein_coding	17	75005568	75392512	latent transforming growth factor beta binding protein 1 [Source:MGI Symbol;Acc:MGI:109151]	2.34241	0.807181	27.8797	1.29099e-07	3.7719e-06
34	ENSMUSG00000001901.15	ENSMUSG00000001901	Kcnh6	protein_coding	11	106008124	106034549	potassium voltage-gated channel, subfamily H (eag-related), member 6 [Source:MGI Symbol;Acc:MGI:2684139]	-7.06411	-1.11319	31.292	2.21992e-08	7.42979e-07
35	ENSMUSG00000001918.17	ENSMUSG00000001918	Slc1a5	protein_coding	7	16781340	16798274	solute carrier family 1 (neutral amino acid transporter), member 5 [Source:MGI Symbol;Acc:MGI:105305]	-2.08555	6.95752	84.1242	4.6465e-20	7.47217e-18
36	ENSMUSG00000001948.10	ENSMUSG00000001948	Spa17	protein_coding	9	37603290	37613722	sperm autoantigenic protein 17 [Source:MGI Symbol;Acc:MGI:1333778]	-1.55056	0.248177	9.37305	0.00220199	0.0195053
37	ENSMUSG00000002006.12	ENSMUSG00000002006	Pdzd4	protein_coding	X	73793359	73824969	PDZ domain containing 4 [Source:MGI Symbol;Acc:MGI:2443483]	1.03547	4.17124	8.55758	0.00344086	0.0279278
38	ENSMUSG00000002033.14	ENSMUSG00000002033	Cd3g	protein_coding	9	44969572	44980431	CD3 antigen, gamma polypeptide [Source:MGI Symbol;Acc:MGI:88333]	2.56455	3.53746	19.4687	1.02261e-05	0.000190463
39	ENSMUSG00000002104.11	ENSMUSG00000002104	Rapsn	protein_coding	2	91035620	91045729	receptor-associated protein of the synapse [Source:MGI Symbol;Acc:MGI:99422]	-2.09588	0.394786	19.6476	9.31187e-06	0.000175585
40	ENSMUSG00000002210.11	ENSMUSG00000002210	Smg9	protein_coding	7	24399619	24422778	smg-9 homolog, nonsense mediated mRNA decay factor (C. elegans) [Source:MGI Symbol;Acc:MGI:1919247]	-0.719976	5.56171	8.37369	0.00380692	0.0302171
41	ENSMUSG00000002228.7	ENSMUSG00000002228	Ppm1j	protein_coding	3	104781056	104786018	protein phosphatase 1J [Source:MGI Symbol;Acc:MGI:1919137]	3.04408	3.0187	25.1471	5.31186e-07	1.36541e-05
42	ENSMUSG00000002324.8	ENSMUSG00000002324	Rec8	protein_coding	14	55618037	55625395	REC8 meiotic recombination protein [Source:MGI Symbol;Acc:MGI:1929645]	-1.46508	4.76411	22.3239	2.30328e-06	5.1075e-05
43	ENSMUSG00000002346.16	ENSMUSG00000002346	Slc25a42	protein_coding	8	70184340	70212305	solute carrier family 25, member 42 [Source:MGI Symbol;Acc:MGI:1920345]	1.04794	3.81553	11.6453	0.000643643	0.00701834
44	ENSMUSG00000002477.4	ENSMUSG00000002477	Snrpd1	protein_coding	18	10617796	10628230	small nuclear ribonucleoprotein D1 [Source:MGI Symbol;Acc:MGI:98344]	-0.894215	5.91228	10.8947	0.000964383	0.00985305
45	ENSMUSG00000002602.16	ENSMUSG00000002602	Axl	protein_coding	7	25757273	25788705	AXL receptor tyrosine kinase [Source:MGI Symbol;Acc:MGI:1347244]	1.77413	4.41357	34.1881	5.00332e-09	1.91053e-07
46	ENSMUSG00000002763.16	ENSMUSG00000002763	Pex6	protein_coding	17	46711463	46725541	peroxisomal biogenesis factor 6 [Source:MGI Symbol;Acc:MGI:2385054]	-0.847769	6.3472	12.1578	0.000488819	0.00550304
47	ENSMUSG00000002845.14	ENSMUSG00000002845	Tmem39a	protein_coding	16	38558698	38592162	transmembrane protein 39a [Source:MGI Symbol;Acc:MGI:1915096]	0.685572	5.29859	9.11921	0.00252939	0.0217768
48	ENSMUSG00000002885.14	ENSMUSG00000002885	Adgre5	protein_coding	8	83723251	83741326	adhesion G protein-coupled receptor E5 [Source:MGI Symbol;Acc:MGI:1347095]	1.59798	7.05382	15.8645	6.80416e-05	0.00101117
49	ENSMUSG00000002900.16	ENSMUSG00000002900	Lamb1	protein_coding	12	31265234	31329644	laminin B1 [Source:MGI Symbol;Acc:MGI:96743]	1.91334	-0.201267	12.3638	0.00043774	0.0050136
50	ENSMUSG00000002944.15	ENSMUSG00000002944	Cd36	protein_coding	5	17781690	17888801	CD36 molecule [Source:MGI Symbol;Acc:MGI:107899]	1.72158	2.1632	7.97183	0.00475109	0.0357733
51	ENSMUSG00000002985.16	ENSMUSG00000002985	Apoe	protein_coding	7	19696109	19699188	apolipoprotein E [Source:MGI Symbol;Acc:MGI:88057]	-2.13176	6.38644	56.2319	6.44087e-14	5.01576e-12
52	ENSMUSG00000003051.13	ENSMUSG00000003051	Elf3	protein_coding	1	135253575	135258568	E74-like factor 3 [Source:MGI Symbol;Acc:MGI:1101781]	-2.64278	-1.77034	10.1935	0.00140935	0.0134153
53	ENSMUSG00000003154.15	ENSMUSG00000003154	Foxj2	protein_coding	6	122819914	122845366	forkhead box J2 [Source:MGI Symbol;Acc:MGI:1926805]	0.710139	5.63496	8.20919	0.00416788	0.0324697
54	ENSMUSG00000003228.8	ENSMUSG00000003228	Grk5	protein_coding	19	60889749	61092553	G protein-coupled receptor kinase 5 [Source:MGI Symbol;Acc:MGI:109161]	1.30771	3.5506	15.5021	8.24124e-05	0.00120127
55	ENSMUSG00000003271.17	ENSMUSG00000003271	Sult2b1	protein_coding	7	45729983	45784669	sulfotransferase family, cytosolic, 2B, member 1 [Source:MGI Symbol;Acc:MGI:1926342]	-2.98132	0.0830071	31.3865	2.11443e-08	7.10074e-07
56	ENSMUSG00000003273.14	ENSMUSG00000003273	Car11	protein_coding	7	45699843	45704682	carbonic anhydrase 11 [Source:MGI Symbol;Acc:MGI:1336193]	1.80917	1.47641	16.0998	6.00905e-05	0.00090387
57	ENSMUSG00000003355.7	ENSMUSG00000003355	Fkbp11	protein_coding	15	98724366	98728198	FK506 binding protein 11 [Source:MGI Symbol;Acc:MGI:1913370]	1.16502	3.84166	8.37418	0.00380589	0.0302171
58	ENSMUSG00000003363.15	ENSMUSG00000003363	Pld3	protein_coding	7	27532000	27553218	phospholipase D family, member 3 [Source:MGI Symbol;Acc:MGI:1333782]	0.936984	6.02305	11.3238	0.000765212	0.00809406
59	ENSMUSG00000003379.7	ENSMUSG00000003379	Cd79a	protein_coding	7	24897381	24902197	CD79A antigen (immunoglobulin-associated alpha) [Source:MGI Symbol;Acc:MGI:101774]	1.91921	5.93001	23.3406	1.35708e-06	3.20323e-05
60	ENSMUSG00000003418.11	ENSMUSG00000003418	St8sia6	protein_coding	2	13651021	13794064	ST8 alpha-N-acetyl-neuraminide alpha-2,8-sialyltransferase 6 [Source:MGI Symbol;Acc:MGI:2386797]	3.6673	5.10998	58.7614	1.78e-14	1.47935e-12
61	ENSMUSG00000003436.11	ENSMUSG00000003436	Dll3	protein_coding	7	28293553	28302238	delta like canonical Notch ligand 3 [Source:MGI Symbol;Acc:MGI:1096877]	4.01602	0.83797	43.8333	3.57563e-11	1.91669e-09
62	ENSMUSG00000003534.17	ENSMUSG00000003534	Ddr1	protein_coding	17	35681567	35704621	discoidin domain receptor family, member 1 [Source:MGI Symbol;Acc:MGI:99216]	1.95219	2.4694	16.7178	4.33724e-05	0.00068359
63	ENSMUSG00000003617.16	ENSMUSG00000003617	Cp	protein_coding	3	19957054	20009145	ceruloplasmin [Source:MGI Symbol;Acc:MGI:88476]	2.25201	0.513198	12.3445	0.000442298	0.00506287
64	ENSMUSG00000003824.12	ENSMUSG00000003824	Syce2	protein_coding	8	84872111	84888221	synaptonemal complex central element protein 2 [Source:MGI Symbol;Acc:MGI:1919096]	-1.10025	5.01097	14.9381	0.000111099	0.00154975
65	ENSMUSG00000003949.16	ENSMUSG00000003949	Hlf	protein_coding	11	90336536	90390895	hepatic leukemia factor [Source:MGI Symbol;Acc:MGI:96108]	-1.2376	7.72	16.5995	4.61637e-05	0.000722404
66	ENSMUSG00000003992.15	ENSMUSG00000003992	Ssbp2	protein_coding	13	91460283	91703429	single-stranded DNA binding protein 2 [Source:MGI Symbol;Acc:MGI:1914220]	-0.595391	5.8936	7.95407	0.00479793	0.0360574
67	ENSMUSG00000004110.16	ENSMUSG00000004110	Cacna1e	protein_coding	1	154390731	154884501	calcium channel, voltage-dependent, R type, alpha 1E subunit [Source:MGI Symbol;Acc:MGI:106217]	3.23806	5.69632	36.2787	1.71026e-09	7.01845e-08
68	ENSMUSG00000004187.11	ENSMUSG00000004187	Kifc2	protein_coding	15	76659858	76668196	kinesin family member C2 [Source:MGI Symbol;Acc:MGI:109187]	1.45559	3.31966	12.7042	0.000364839	0.00429945
69	ENSMUSG00000004328.15	ENSMUSG00000004328	Hif3a	protein_coding	7	17031507	17062427	hypoxia inducible factor 3, alpha subunit [Source:MGI Symbol;Acc:MGI:1859778]	1.45543	3.49927	18.79	1.45932e-05	0.000262651
70	ENSMUSG00000004347.16	ENSMUSG00000004347	Pde1c	protein_coding	6	56069804	56569103	phosphodiesterase 1C [Source:MGI Symbol;Acc:MGI:108413]	-1.78961	1.58471	17.9458	2.27282e-05	0.000386888
71	ENSMUSG00000004460.17	ENSMUSG00000004460	Dnajb11	protein_coding	16	22857845	22879634	DnaJ heat shock protein family (Hsp40) member B11 [Source:MGI Symbol;Acc:MGI:1915088]	0.961774	7.17466	10.2292	0.00138233	0.0132188
72	ENSMUSG00000004552.16	ENSMUSG00000004552	Ctse	protein_coding	1	131638306	131675505	cathepsin E [Source:MGI Symbol;Acc:MGI:107361]	2.02466	6.57097	59.901	9.97493e-15	8.50449e-13
73	ENSMUSG00000004661.15	ENSMUSG00000004661	Arid3b	protein_coding	9	57790353	57836793	AT rich interactive domain 3B (BRIGHT-like) [Source:MGI Symbol;Acc:MGI:1930768]	1.06223	4.59122	12.3962	0.000430212	0.00494744
74	ENSMUSG00000004730.15	ENSMUSG00000004730	Adgre1	protein_coding	17	57358691	57483527	adhesion G protein-coupled receptor E1 [Source:MGI Symbol;Acc:MGI:106912]	2.28339	1.90739	10.846	0.000990106	0.0100587
75	ENSMUSG00000004951.10	ENSMUSG00000004951	Hspb1	protein_coding	5	135887919	135889563	heat shock protein 1 [Source:MGI Symbol;Acc:MGI:96240]	2.38293	0.85772	9.13854	0.0025028	0.0216181
76	ENSMUSG00000004996.9	ENSMUSG00000004996	Mri1	protein_coding	8	84249906	84257326	methylthioribose-1-phosphate isomerase 1 [Source:MGI Symbol;Acc:MGI:1915123]	-0.765976	5.47095	12.4332	0.000421777	0.00485891
77	ENSMUSG00000005125.13	ENSMUSG00000005125	Ndrg1	protein_coding	15	66929318	66969640	N-myc downstream regulated gene 1 [Source:MGI Symbol;Acc:MGI:1341799]	-1.28187	6.05185	23.3287	1.36545e-06	3.21532e-05
78	ENSMUSG00000005237.14	ENSMUSG00000005237	Dnah2	protein_coding	11	69420809	69549110	dynein, axonemal, heavy chain 2 [Source:MGI Symbol;Acc:MGI:107731]	2.18465	-0.504952	15.0634	0.000103959	0.00146774
79	ENSMUSG00000005268.20	ENSMUSG00000005268	Prlr	protein_coding	15	10177238	10349180	prolactin receptor [Source:MGI Symbol;Acc:MGI:97763]	4.55422	4.07601	83.8646	5.29851e-20	8.45199e-18
80	ENSMUSG00000005360.14	ENSMUSG00000005360	Slc1a3	protein_coding	15	8634124	8710764	solute carrier family 1 (glial high affinity glutamate transporter), member 3 [Source:MGI Symbol;Acc:MGI:99917]	1.95056	-1.72577	9.826	0.00172062	0.0159111
81	ENSMUSG00000005364.11	ENSMUSG00000005364	Il5ra	protein_coding	6	106710357	106749037	interleukin 5 receptor, alpha [Source:MGI Symbol;Acc:MGI:96558]	3.65075	3.87224	31.2391	2.28125e-08	7.62215e-07
82	ENSMUSG00000005397.8	ENSMUSG00000005397	Nid1	protein_coding	13	13437551	13512269	nidogen 1 [Source:MGI Symbol;Acc:MGI:97342]	3.09913	0.548707	17.1179	3.51297e-05	0.000565391
83	ENSMUSG00000005413.8	ENSMUSG00000005413	Hmox1	protein_coding	8	75093621	75100589	heme oxygenase 1 [Source:MGI Symbol;Acc:MGI:96163]	1.68216	3.31128	14.5509	0.000136426	0.00184325
84	ENSMUSG00000005611.15	ENSMUSG00000005611	Mrvi1	protein_coding	7	110868266	110982461	MRV integration site 1 [Source:MGI Symbol;Acc:MGI:1338023]	-1.28628	3.33097	8.72057	0.0031464	0.0259966
85	ENSMUSG00000005628.12	ENSMUSG00000005628	Tmod4	protein_coding	3	95124476	95129209	tropomodulin 4 [Source:MGI Symbol;Acc:MGI:1355285]	2.23907	1.85314	22.9934	1.62556e-06	3.78722e-05
86	ENSMUSG00000005640.11	ENSMUSG00000005640	Insrr	protein_coding	3	87796951	87816101	insulin receptor-related receptor [Source:MGI Symbol;Acc:MGI:1346037]	-5.50751	2.02091	104.053	1.96962e-24	4.69386e-22
87	ENSMUSG00000005686.17	ENSMUSG00000005686	Ampd3	protein_coding	7	110768206	110812405	adenosine monophosphate deaminase 3 [Source:MGI Symbol;Acc:MGI:1096344]	1.01669	4.20486	7.74451	0.00538762	0.0395572
88	ENSMUSG00000005696.11	ENSMUSG00000005696	Sh2d1a	protein_coding	X	42502453	42529330	SH2 domain containing 1A [Source:MGI Symbol;Acc:MGI:1328352]	3.28977	1.54785	25.1459	5.31529e-07	1.36541e-05
89	ENSMUSG00000005951.13	ENSMUSG00000005951	Shpk	protein_coding	11	73199460	73224511	sedoheptulokinase [Source:MGI Symbol;Acc:MGI:1921887]	0.831505	3.46165	7.3412	0.0067392	0.0471696
90	ENSMUSG00000005952.15	ENSMUSG00000005952	Trpv1	protein_coding	11	73234292	73261242	transient receptor potential cation channel, subfamily V, member 1 [Source:MGI Symbol;Acc:MGI:1341787]	4.94948	-1.19295	39.4392	3.38432e-10	1.5751e-08
91	ENSMUSG00000006143.12	ENSMUSG00000006143	Upk3bl	protein_coding	5	136054492	136064326	uroplakin 3B-like [Source:MGI Symbol;Acc:MGI:1916915]	2.32664	-0.595539	18.5688	1.6388e-05	0.000290461
92	ENSMUSG00000006154.13	ENSMUSG00000006154	Eps8l1	protein_coding	7	4460674	4480487	EPS8-like 1 [Source:MGI Symbol;Acc:MGI:1914675]	-6.15733	4.2436	116.32	4.04389e-27	1.1763e-24
93	ENSMUSG00000006205.13	ENSMUSG00000006205	Htra1	protein_coding	7	130936111	130985660	HtrA serine peptidase 1 [Source:MGI Symbol;Acc:MGI:1929076]	3.43701	-0.0104835	28.4883	9.42649e-08	2.81655e-06
94	ENSMUSG00000006289.14	ENSMUSG00000006289	Osgep	protein_coding	14	50906478	50924893	O-sialoglycoprotein endopeptidase [Source:MGI Symbol;Acc:MGI:1913496]	-0.681412	5.58304	8.44377	0.00366297	0.0293929
95	ENSMUSG00000006344.17	ENSMUSG00000006344	Ggt5	protein_coding	10	75589340	75617200	gamma-glutamyltransferase 5 [Source:MGI Symbol;Acc:MGI:1346063]	-1.49658	4.72063	34.2471	4.85387e-09	1.86065e-07
96	ENSMUSG00000006360.11	ENSMUSG00000006360	Crip1	protein_coding	12	113146316	113153879	cysteine-rich protein 1 (intestinal) [Source:MGI Symbol;Acc:MGI:88501]	-1.00787	6.1018	8.77385	0.00305579	0.0253752
97	ENSMUSG00000006378.15	ENSMUSG00000006378	Gcat	protein_coding	15	79030874	79038353	glycine C-acetyltransferase (2-amino-3-ketobutyrate-coenzyme A ligase) [Source:MGI Symbol;Acc:MGI:1349389]	-1.37543	0.720112	8.64625	0.00327735	0.0268764
98	ENSMUSG00000006435.15	ENSMUSG00000006435	Neurl1a	protein_coding	19	47178820	47259440	neuralized E3 ubiquitin protein ligase 1A [Source:MGI Symbol;Acc:MGI:1334263]	1.50689	0.76223	8.33231	0.00389461	0.0307404
99	ENSMUSG00000006469.13	ENSMUSG00000006469	Slc34a3	protein_coding	2	25228898	25234364	solute carrier family 34 (sodium phosphate), member 3 [Source:MGI Symbol;Acc:MGI:2159410]	2.52612	-1.22012	16.4685	4.94659e-05	0.000766799
100	ENSMUSG00000006494.11	ENSMUSG00000006494	Pdk1	protein_coding	2	71873224	71903858	pyruvate dehydrogenase kinase, isoenzyme 1 [Source:MGI Symbol;Acc:MGI:1926119]	-0.639655	6.78468	7.93432	0.00485059	0.036384
101	ENSMUSG00000006567.11	ENSMUSG00000006567	Atp7b	protein_coding	8	21992785	22060305	ATPase, Cu++ transporting, beta polypeptide [Source:MGI Symbol;Acc:MGI:103297]	1.91221	3.30429	23.0443	1.58315e-06	3.7015e-05
102	ENSMUSG00000006638.14	ENSMUSG00000006638	Abhd1	processed_transcript	5	30950066	30955091	abhydrolase domain containing 1 [Source:MGI Symbol;Acc:MGI:1931013]	1.68571	-0.650585	10.3613	0.00128682	0.0124955
103	ENSMUSG00000006651.8	ENSMUSG00000006651	Aplp1	protein_coding	7	30434982	30445535	amyloid beta (A4) precursor-like protein 1 [Source:MGI Symbol;Acc:MGI:88046]	3.45918	1.68486	41.8361	9.92551e-11	4.97029e-09
104	ENSMUSG00000006715.11	ENSMUSG00000006715	Gmnn	protein_coding	13	24751845	24761923	geminin [Source:MGI Symbol;Acc:MGI:1927344]	-0.826357	5.25407	10.6112	0.00112403	0.0111557
105	ENSMUSG00000006720.16	ENSMUSG00000006720	Zfp184	protein_coding	13	21945094	21960779	zinc finger protein 184 (Kruppel-like) [Source:MGI Symbol;Acc:MGI:1922244]	-1.14345	3.53566	13.5026	0.00023823	0.00298808
106	ENSMUSG00000006800.14	ENSMUSG00000006800	Sulf2	protein_coding	2	166073089	166155663	sulfatase 2 [Source:MGI Symbol;Acc:MGI:1919293]	1.91122	3.66445	31.7613	1.74333e-08	5.94534e-07
107	ENSMUSG00000006930.15	ENSMUSG00000006930	Hap1	protein_coding	11	100347327	100356128	huntingtin-associated protein 1 [Source:MGI Symbol;Acc:MGI:1261831]	1.72826	1.80996	12.4666	0.000414283	0.00479128
108	ENSMUSG00000007035.15	ENSMUSG00000007035	Msh5	protein_coding	17	35028605	35046745	mutS homolog 5 [Source:MGI Symbol;Acc:MGI:1329021]	2.97363	6.17185	156.06	8.21366e-36	4.27543e-33
109	ENSMUSG00000007039.12	ENSMUSG00000007039	Ddah2	protein_coding	17	35059035	35062095	dimethylarginine dimethylaminohydrolase 2 [Source:MGI Symbol;Acc:MGI:1859016]	-1.36701	4.52267	18.7627	1.48038e-05	0.000265716
110	ENSMUSG00000007480.3	ENSMUSG00000007480	Mc5r	protein_coding	18	68337603	68339711	melanocortin 5 receptor [Source:MGI Symbol;Acc:MGI:99420]	-1.92562	2.88207	14.4947	0.000140557	0.0018849
111	ENSMUSG00000007888.15	ENSMUSG00000007888	Crlf1	protein_coding	8	70493158	70504081	cytokine receptor-like factor 1 [Source:MGI Symbol;Acc:MGI:1340030]	2.86568	-0.577071	16.417	5.08281e-05	0.000784839
112	ENSMUSG00000008333.12	ENSMUSG00000008333	Snrpb2	protein_coding	2	143063039	143072853	U2 small nuclear ribonucleoprotein B [Source:MGI Symbol;Acc:MGI:104805]	-0.716159	5.56424	8.10765	0.00440788	0.03382
113	ENSMUSG00000008393.9	ENSMUSG00000008393	Carhsp1	protein_coding	16	8658580	8672155	calcium regulated heat stable protein 1 [Source:MGI Symbol;Acc:MGI:1196368]	0.786773	5.20176	7.92268	0.00488189	0.0365495
114	ENSMUSG00000008461.6	ENSMUSG00000008461	Fut1	protein_coding	7	45617289	45621059	fucosyltransferase 1 [Source:MGI Symbol;Acc:MGI:109375]	4.38112	4.53799	46.0564	1.14895e-11	6.66456e-10
115	ENSMUSG00000008575.17	ENSMUSG00000008575	Nfib	protein_coding	4	82290173	82705750	nuclear factor I/B [Source:MGI Symbol;Acc:MGI:103188]	2.02609	-1.18575	9.30231	0.00228865	0.0201019
116	ENSMUSG00000008601.12	ENSMUSG00000008601	Rab25	protein_coding	3	88542029	88548300	RAB25, member RAS oncogene family [Source:MGI Symbol;Acc:MGI:1858203]	1.47141	-0.280275	7.70877	0.00549531	0.0401393
117	ENSMUSG00000008668.14	ENSMUSG00000008668	Rps18	protein_coding	17	33951999	33956001	ribosomal protein S18 [Source:MGI Symbol;Acc:MGI:98146]	-1.21499	8.63222	10.2956	0.00133347	0.0128915
118	ENSMUSG00000008892.12	ENSMUSG00000008892	Vdac3	protein_coding	8	22577075	22593813	voltage-dependent anion channel 3 [Source:MGI Symbol;Acc:MGI:106922]	-0.699604	5.35586	8.47865	0.00359339	0.0289639
119	ENSMUSG00000009035.15	ENSMUSG00000009035	Tmem184b	protein_coding	15	79360684	79403569	transmembrane protein 184b [Source:MGI Symbol;Acc:MGI:2445179]	1.58393	6.24318	38.8444	4.5897e-10	2.09664e-08
120	ENSMUSG00000009092.5	ENSMUSG00000009092	Derl3	protein_coding	10	75893413	75895941	Der1-like domain family, member 3 [Source:MGI Symbol;Acc:MGI:1917627]	3.73623	6.87263	34.1679	5.05572e-09	1.92682e-07
121	ENSMUSG00000009145.6	ENSMUSG00000009145	Dqx1	protein_coding	6	83057844	83067318	DEAQ RNA-dependent ATPase [Source:MGI Symbol;Acc:MGI:2136388]	1.1442	3.02718	10.2509	0.00136616	0.0130924
122	ENSMUSG00000009376.15	ENSMUSG00000009376	Met	protein_coding	6	17463800	17573980	met proto-oncogene [Source:MGI Symbol;Acc:MGI:96969]	1.51506	2.86156	11.7135	0.000620496	0.00678464
123	ENSMUSG00000009418.15	ENSMUSG00000009418	Nav1	protein_coding	1	135434580	135607295	neuron navigator 1 [Source:MGI Symbol;Acc:MGI:2183683]	-1.59074	5.58765	26.0543	3.31942e-07	8.84881e-06
124	ENSMUSG00000009585.18	ENSMUSG00000009585	Apobec3	protein_coding	15	79891659	79915906	apolipoprotein B mRNA editing enzyme, catalytic polypeptide 3 [Source:MGI Symbol;Acc:MGI:1933111]	-0.734548	7.7576	7.97882	0.00473278	0.0356626
125	ENSMUSG00000009588.9	ENSMUSG00000009588	St6galnac1	protein_coding	11	116765025	116775507	ST6 (alpha-N-acetyl-neuraminyl-2,3-beta-galactosyl-1,3)-N-acetylgalactosaminide alpha-2,6-sialyltransferase 1 [Source:MGI Symbol;Acc:MGI:1341826]	9.164	2.01691	148.962	2.92338e-34	1.37677e-31
126	ENSMUSG00000009739.17	ENSMUSG00000009739	Pou6f1	protein_coding	15	100575318	100599984	POU domain, class 6, transcription factor 1 [Source:MGI Symbol;Acc:MGI:102935]	1.37327	4.69749	18.12	2.07414e-05	0.000358624
127	ENSMUSG00000010021.13	ENSMUSG00000010021	Kif19a	protein_coding	11	114765388	114790739	kinesin family member 19A [Source:MGI Symbol;Acc:MGI:2447024]	1.29608	2.72186	12.2757	0.000458896	0.00521364
128	ENSMUSG00000010095.13	ENSMUSG00000010095	Slc3a2	protein_coding	19	8706882	8723369	solute carrier family 3 (activators of dibasic and neutral amino acid transport), member 2 [Source:MGI Symbol;Acc:MGI:96955]	1.6119	9.07672	10.7104	0.00106533	0.0106965
129	ENSMUSG00000010142.12	ENSMUSG00000010142	Tnfrsf13b	protein_coding	11	61126755	61149372	tumor necrosis factor receptor superfamily, member 13b [Source:MGI Symbol;Acc:MGI:1889411]	0.840333	6.79535	9.47203	0.00208628	0.0186812
130	ENSMUSG00000010505.16	ENSMUSG00000010505	Myt1	protein_coding	2	181763332	181827797	myelin transcription factor 1 [Source:MGI Symbol;Acc:MGI:1100535]	5.05471	-2.54927	12.869	0.000334066	0.00399506
131	ENSMUSG00000010660.3	ENSMUSG00000010660	Plcd1	protein_coding	9	119071527	119093502	phospholipase C, delta 1 [Source:MGI Symbol;Acc:MGI:97614]	1.95246	-0.255405	12.3742	0.0004353	0.0049961
132	ENSMUSG00000010830.8	ENSMUSG00000010830	Kdelr3	protein_coding	15	79516411	79527739	KDEL (Lys-Asp-Glu-Leu) endoplasmic reticulum protein retention receptor 3 [Source:MGI Symbol;Acc:MGI:2145953]	2.09254	0.499354	7.86875	0.00502963	0.0373857
133	ENSMUSG00000011052.6	ENSMUSG00000011052	1700049J03Rik	antisense	17	26554254	26561499	RIKEN cDNA 1700049J03 gene [Source:MGI Symbol;Acc:MGI:1920615]	4.42912	-2.41532	9.37462	0.00220011	0.0194974
134	ENSMUSG00000011148.14	ENSMUSG00000011148	Adssl1	protein_coding	12	112620045	112641360	adenylosuccinate synthetase like 1 [Source:MGI Symbol;Acc:MGI:87947]	-0.886447	5.94441	12.9754	0.000315607	0.00379726
135	ENSMUSG00000011263.16	ENSMUSG00000011263	Exoc3l2	protein_coding	7	19463331	19496762	exocyst complex component 3-like 2 [Source:MGI Symbol;Acc:MGI:1921713]	-1.11321	3.41999	7.27262	0.00700135	0.0485237
136	ENSMUSG00000011831.16	ENSMUSG00000011831	Evi5	protein_coding	5	107744795	107875107	ecotropic viral integration site 5 [Source:MGI Symbol;Acc:MGI:104736]	1.32658	5.32056	20.0398	7.58479e-06	0.000146368
137	ENSMUSG00000012429.9	ENSMUSG00000012429	Mplkip	protein_coding	13	17695192	17699748	M-phase specific PLK1 intereacting protein [Source:MGI Symbol;Acc:MGI:1913558]	-0.783904	4.66795	10.3821	0.00127246	0.0123743
138	ENSMUSG00000012519.14	ENSMUSG00000012519	Mlkl	protein_coding	8	111311797	111338177	mixed lineage kinase domain-like [Source:MGI Symbol;Acc:MGI:1921818]	-1.24457	4.66597	22.5268	2.07229e-06	4.67301e-05
139	ENSMUSG00000012819.15	ENSMUSG00000012819	Cdh23	protein_coding	10	60302748	60696490	cadherin 23 (otocadherin) [Source:MGI Symbol;Acc:MGI:1890219]	1.67838	2.94281	17.2624	3.25564e-05	0.000529576
140	ENSMUSG00000013076.17	ENSMUSG00000013076	Amotl1	protein_coding	9	14541966	14645056	angiomotin-like 1 [Source:MGI Symbol;Acc:MGI:1922973]	2.46912	-0.99775	11.3372	0.000759708	0.00804445
141	ENSMUSG00000013155.10	ENSMUSG00000013155	Enkd1	protein_coding	8	105703651	105708210	enkurin domain containing 1 [Source:MGI Symbol;Acc:MGI:2142593]	-0.783103	4.39153	7.68984	0.00555325	0.0404729
142	ENSMUSG00000013584.5	ENSMUSG00000013584	Aldh1a2	protein_coding	9	71215789	71296243	aldehyde dehydrogenase family 1, subfamily A2 [Source:MGI Symbol;Acc:MGI:107928]	3.15651	0.203008	28.4895	9.42096e-08	2.81655e-06
143	ENSMUSG00000013643.13	ENSMUSG00000013643	Lypd8	protein_coding	11	58379043	58390728	LY6/PLAUR domain containing 8 [Source:MGI Symbol;Acc:MGI:1917413]	-3.66577	0.259898	10.0517	0.00152207	0.0142821
144	ENSMUSG00000013698.12	ENSMUSG00000013698	Pea15a	protein_coding	1	172196728	172206804	phosphoprotein enriched in astrocytes 15A [Source:MGI Symbol;Acc:MGI:104799]	0.902798	4.76706	12.7486	0.000356274	0.00421945
145	ENSMUSG00000013921.15	ENSMUSG00000013921	Clip3	protein_coding	7	30291728	30308367	CAP-GLY domain containing linker protein 3 [Source:MGI Symbol;Acc:MGI:1923936]	1.11831	2.33499	8.37653	0.00380097	0.030206
146	ENSMUSG00000014543.14	ENSMUSG00000014543	Klra17	protein_coding	6	129831154	129876672	killer cell lectin-like receptor, subfamily A, member 17 [Source:MGI Symbol;Acc:MGI:2180674]	3.43627	2.74023	17.3098	3.1755e-05	0.000516966
147	ENSMUSG00000014686.8	ENSMUSG00000014686	Ceacam16	protein_coding	7	19852097	19861299	carcinoembryonic antigen-related cell adhesion molecule 16 [Source:MGI Symbol;Acc:MGI:2685615]	2.73113	1.92703	35.1152	3.10767e-09	1.2294e-07
148	ENSMUSG00000014776.7	ENSMUSG00000014776	Nol3	protein_coding	8	105276140	105281939	nucleolar protein 3 (apoptosis repressor with CARD domain) [Source:MGI Symbol;Acc:MGI:1925938]	2.89047	-0.0424216	22.4195	2.19134e-06	4.9088e-05
149	ENSMUSG00000014905.4	ENSMUSG00000014905	Dnajb9	protein_coding	12	44205559	44210326	DnaJ heat shock protein family (Hsp40) member B9 [Source:MGI Symbol;Acc:MGI:1351618]	0.917849	6.56669	14.5179	0.000138837	0.00186689
150	ENSMUSG00000014959.12	ENSMUSG00000014959	Gorasp2	protein_coding	2	70661576	70712636	golgi reassembly stacking protein 2 [Source:MGI Symbol;Acc:MGI:2135962]	0.618927	6.66459	7.53904	0.00603763	0.0432056
151	ENSMUSG00000015027.11	ENSMUSG00000015027	Galns	protein_coding	8	122578242	122611463	galactosamine (N-acetyl)-6-sulfate sulfatase [Source:MGI Symbol;Acc:MGI:1355303]	0.863213	5.48663	9.90756	0.00164601	0.0152783
152	ENSMUSG00000015224.10	ENSMUSG00000015224	Cyp2j9	protein_coding	4	96568429	96591578	cytochrome P450, family 2, subfamily j, polypeptide 9 [Source:MGI Symbol;Acc:MGI:1921769]	-0.953049	4.1496	9.95221	0.00160656	0.0149895
153	ENSMUSG00000015314.10	ENSMUSG00000015314	Slamf6	protein_coding	1	171917515	171953170	SLAM family member 6 [Source:MGI Symbol;Acc:MGI:1353620]	2.30503	4.06283	36.4944	1.53106e-09	6.32242e-08
154	ENSMUSG00000015340.10	ENSMUSG00000015340	Cybb	protein_coding	X	9435252	9487771	cytochrome b-245, beta polypeptide [Source:MGI Symbol;Acc:MGI:88574]	2.02825	7.29538	10.5882	0.0011381	0.0112783
155	ENSMUSG00000015363.13	ENSMUSG00000015363	Trabd	protein_coding	15	89075124	89087077	TraB domain containing [Source:MGI Symbol;Acc:MGI:1915226]	0.85892	6.91236	10.1591	0.00143592	0.0136223
156	ENSMUSG00000015437.5	ENSMUSG00000015437	Gzmb	protein_coding	14	56258838	56262260	granzyme B [Source:MGI Symbol;Acc:MGI:109267]	2.15331	0.68489	12.7864	0.000349153	0.00414789
157	ENSMUSG00000015451.16	ENSMUSG00000015451	C4a	processed_transcript	17	34809092	34823464	complement component 4A (Rodgers blood group) [Source:MGI Symbol;Acc:MGI:98320]	1.95077	2.23634	22.5661	2.03033e-06	4.60022e-05
158	ENSMUSG00000015599.9	ENSMUSG00000015599	Ttbk1	protein_coding	17	46442448	46487675	tau tubulin kinase 1 [Source:MGI Symbol;Acc:MGI:2147036]	1.03298	2.40159	8.17557	0.00424582	0.0329343
159	ENSMUSG00000015850.11	ENSMUSG00000015850	Adamtsl4	protein_coding	3	95676201	95687917	ADAMTS-like 4 [Source:MGI Symbol;Acc:MGI:2389008]	1.48151	2.58226	10.2881	0.00133892	0.0129379
160	ENSMUSG00000015854.7	ENSMUSG00000015854	Cd5l	protein_coding	3	87357881	87371073	CD5 antigen-like [Source:MGI Symbol;Acc:MGI:1334419]	3.39467	0.841276	38.5217	5.41485e-10	2.44534e-08
161	ENSMUSG00000015879.8	ENSMUSG00000015879	Fam184b	protein_coding	5	45529705	45639614	family with sequence similarity 184, member B [Source:MGI Symbol;Acc:MGI:2442958]	4.53851	3.93156	130.12	3.85733e-30	1.36246e-27
162	ENSMUSG00000015947.10	ENSMUSG00000015947	Fcgr1	protein_coding	3	96282909	96293969	Fc receptor, IgG, high affinity I [Source:MGI Symbol;Acc:MGI:95498]	1.8208	0.0835637	11.819	0.000586301	0.00644997
163	ENSMUSG00000015968.17	ENSMUSG00000015968	Cacna1d	protein_coding	14	30039939	30491455	calcium channel, voltage-dependent, L type, alpha 1D subunit [Source:MGI Symbol;Acc:MGI:88293]	2.82328	4.4656	43.138	5.10126e-11	2.66234e-09
164	ENSMUSG00000015981.12	ENSMUSG00000015981	Stk32c	protein_coding	7	139103638	139213307	serine/threonine kinase 32C [Source:MGI Symbol;Acc:MGI:2385336]	2.82182	1.38012	16.351	5.26296e-05	0.000806987
165	ENSMUSG00000016194.14	ENSMUSG00000016194	Hsd11b1	protein_coding	1	193221634	193264075	hydroxysteroid 11-beta dehydrogenase 1 [Source:MGI Symbol;Acc:MGI:103562]	2.04568	4.57948	11.123	0.00085266	0.00888599
166	ENSMUSG00000016200.14	ENSMUSG00000016200	Syt14	protein_coding	1	192891233	193035775	synaptotagmin XIV [Source:MGI Symbol;Acc:MGI:2444490]	2.61982	1.76772	21.6869	3.20979e-06	6.80488e-05
167	ENSMUSG00000016239.11	ENSMUSG00000016239	Lonrf3	protein_coding	X	36328353	36362341	LON peptidase N-terminal domain and ring finger 3 [Source:MGI Symbol;Acc:MGI:1921615]	-0.863662	3.05989	7.251	0.00708617	0.0490257
168	ENSMUSG00000016349.10	ENSMUSG00000016349	Eef1a2	protein_coding	2	181147653	181157014	eukaryotic translation elongation factor 1 alpha 2 [Source:MGI Symbol;Acc:MGI:1096317]	2.78043	-1.72267	10.8895	0.000967095	0.00987056
169	ENSMUSG00000016356.18	ENSMUSG00000016356	Col20a1	protein_coding	2	180986535	181018363	collagen, type XX, alpha 1 [Source:MGI Symbol;Acc:MGI:1920618]	1.54926	3.14544	13.0255	0.000307277	0.00370832
170	ENSMUSG00000016494.9	ENSMUSG00000016494	Cd34	protein_coding	1	194938819	194961279	CD34 antigen [Source:MGI Symbol;Acc:MGI:88329]	-1.37372	8.7827	13.3948	0.000252322	0.00314885
171	ENSMUSG00000016503.17	ENSMUSG00000016503	Gtf3a	protein_coding	5	146948657	146955614	general transcription factor III A [Source:MGI Symbol;Acc:MGI:1913846]	-0.740597	4.53967	8.15993	0.00428259	0.0331805
172	ENSMUSG00000016756.17	ENSMUSG00000016756	Cmah	protein_coding	13	24327404	24477377	cytidine monophospho-N-acetylneuraminic acid hydroxylase [Source:MGI Symbol;Acc:MGI:103227]	1.19557	7.47735	13.4774	0.000241453	0.00302466
173	ENSMUSG00000016763.15	ENSMUSG00000016763	Scube1	protein_coding	15	83604999	83725021	signal peptide, CUB domain, EGF-like 1 [Source:MGI Symbol;Acc:MGI:1890616]	2.0359	-2.04388	7.64167	0.00570351	0.0413395
174	ENSMUSG00000016995.17	ENSMUSG00000016995	Matn4	protein_coding	2	164389393	164405160	matrilin 4 [Source:MGI Symbol;Acc:MGI:1328314]	-4.11873	1.00986	39.5678	3.16872e-10	1.48524e-08
175	ENSMUSG00000017007.9	ENSMUSG00000017007	Rbpjl	protein_coding	2	164403141	164415448	recombination signal binding protein for immunoglobulin kappa J region-like [Source:MGI Symbol;Acc:MGI:1196616]	-1.75167	-0.507579	8.93684	0.00279476	0.0236426
176	ENSMUSG00000017009.3	ENSMUSG00000017009	Sdc4	protein_coding	2	164424247	164443887	syndecan 4 [Source:MGI Symbol;Acc:MGI:1349164]	0.825746	4.85439	9.82033	0.00172594	0.0159454
177	ENSMUSG00000017057.9	ENSMUSG00000017057	Il13ra1	protein_coding	X	36112110	36171259	interleukin 13 receptor, alpha 1 [Source:MGI Symbol;Acc:MGI:105052]	3.4285	4.72569	30.1137	4.07435e-08	1.30617e-06
178	ENSMUSG00000017167.6	ENSMUSG00000017167	Cntnap1	protein_coding	11	101170523	101190724	contactin associated protein-like 1 [Source:MGI Symbol;Acc:MGI:1858201]	1.72519	2.81717	16.3155	5.36247e-05	0.000819704
179	ENSMUSG00000017286.15	ENSMUSG00000017286	Glod4	protein_coding	11	76120987	76243725	glyoxalase domain containing 4 [Source:MGI Symbol;Acc:MGI:1914451]	-0.654381	5.76086	8.14367	0.00432119	0.0333597
180	ENSMUSG00000017400.10	ENSMUSG00000017400	Stac2	protein_coding	11	98036623	98053462	SH3 and cysteine rich domain 2 [Source:MGI Symbol;Acc:MGI:2144518]	2.85208	3.37443	15.0836	0.000102852	0.00145522
181	ENSMUSG00000017446.14	ENSMUSG00000017446	C1qtnf1	protein_coding	11	118428203	118449963	C1q and tumor necrosis factor related protein 1 [Source:MGI Symbol;Acc:MGI:1919254]	2.70104	0.272525	20.4997	5.96421e-06	0.000117854
182	ENSMUSG00000017607.9	ENSMUSG00000017607	Tns4	protein_coding	11	99065678	99089306	tensin 4 [Source:MGI Symbol;Acc:MGI:2144377]	1.38738	0.252679	9.68755	0.00185521	0.0168875
183	ENSMUSG00000017639.13	ENSMUSG00000017639	Rab11fip4	protein_coding	11	79591212	79698023	RAB11 family interacting protein 4 (class II) [Source:MGI Symbol;Acc:MGI:2442920]	1.90946	4.50219	21.735	3.13026e-06	6.64341e-05
184	ENSMUSG00000017718.15	ENSMUSG00000017718	Afmid	protein_coding	11	117825924	117839908	arylformamidase [Source:MGI Symbol;Acc:MGI:2448704]	1.23872	2.6246	10.8552	0.000985163	0.0100188
185	ENSMUSG00000017754.13	ENSMUSG00000017754	Pltp	protein_coding	2	164839518	164857711	phospholipid transfer protein [Source:MGI Symbol;Acc:MGI:103151]	2.23682	1.06696	13.9206	0.000190697	0.00246857
186	ENSMUSG00000017765.17	ENSMUSG00000017765	Slc12a4	protein_coding	8	105943590	105966097	solute carrier family 12, member 4 [Source:MGI Symbol;Acc:MGI:1309465]	1.48769	4.73573	24.8515	6.19205e-07	1.5763e-05
187	ENSMUSG00000018001.18	ENSMUSG00000018001	Cyth3	protein_coding	5	143622447	143710250	cytohesin 3 [Source:MGI Symbol;Acc:MGI:1335107]	0.836997	5.08581	14.4089	0.000147103	0.00196071
188	ENSMUSG00000018102.5	ENSMUSG00000018102	Hist1h2bc	protein_coding	13	23684199	23692908	histone cluster 1, H2bc [Source:MGI Symbol;Acc:MGI:1915274]	-1.30327	2.93217	11.526	0.000686289	0.00740174
189	ENSMUSG00000018168.8	ENSMUSG00000018168	Ikzf3	protein_coding	11	98464902	98546031	IKAROS family zinc finger 3 [Source:MGI Symbol;Acc:MGI:1342542]	2.84867	5.914	25.9897	3.4324e-07	9.12539e-06
190	ENSMUSG00000018387.12	ENSMUSG00000018387	Shroom1	protein_coding	11	53457205	53467766	shroom family member 1 [Source:MGI Symbol;Acc:MGI:1919024]	2.13654	1.42543	23.6615	1.14856e-06	2.75043e-05
191	ENSMUSG00000018401.17	ENSMUSG00000018401	Mtmr4	protein_coding	11	87592162	87616302	myotubularin related protein 4 [Source:MGI Symbol;Acc:MGI:2180699]	0.600812	6.00933	8.07932	0.00447733	0.0342095
192	ENSMUSG00000018425.18	ENSMUSG00000018425	Dhx40	protein_coding	11	86768846	86807746	DEAH (Asp-Glu-Ala-His) box polypeptide 40 [Source:MGI Symbol;Acc:MGI:1914737]	0.810719	4.8616	10.0411	0.00153089	0.014358
193	ENSMUSG00000018459.15	ENSMUSG00000018459	Slc13a3	protein_coding	2	165405028	165473230	solute carrier family 13 (sodium-dependent dicarboxylate transporter), member 3 [Source:MGI Symbol;Acc:MGI:2149635]	2.92809	-2.41771	12.5666	0.000392697	0.00457723
194	ENSMUSG00000018470.8	ENSMUSG00000018470	Kcnab3	protein_coding	11	69326258	69333042	potassium voltage-gated channel, shaker-related subfamily, beta member 3 [Source:MGI Symbol;Acc:MGI:1336208]	2.06963	1.02255	19.2162	1.16721e-05	0.000214767
195	ENSMUSG00000018569.12	ENSMUSG00000018569	Cldn7	protein_coding	11	69964779	69967885	claudin 7 [Source:MGI Symbol;Acc:MGI:1859285]	2.80647	3.29015	41.5987	1.12068e-10	5.54174e-09
196	ENSMUSG00000018581.15	ENSMUSG00000018581	Dnah11	protein_coding	12	117877982	118199043	dynein, axonemal, heavy chain 11 [Source:MGI Symbol;Acc:MGI:1100864]	1.5868	0.357867	8.79636	0.00301833	0.0251273
197	ENSMUSG00000018750.14	ENSMUSG00000018750	Zbtb4	protein_coding	11	69765912	69784023	zinc finger and BTB domain containing 4 [Source:MGI Symbol;Acc:MGI:1922830]	1.05076	5.33496	16.6105	4.58952e-05	0.00071934
198	ENSMUSG00000018800.14	ENSMUSG00000018800	Abca5	protein_coding	11	110269369	110337716	ATP-binding cassette, sub-family A (ABC1), member 5 [Source:MGI Symbol;Acc:MGI:2386607]	1.1296	3.37051	10.8021	0.00101383	0.0102576
199	ENSMUSG00000018861.8	ENSMUSG00000018861	Fdxr	protein_coding	11	115268024	115277050	ferredoxin reductase [Source:MGI Symbol;Acc:MGI:104724]	-0.769551	5.0017	8.97137	0.00274243	0.0232513
200	ENSMUSG00000018906.14	ENSMUSG00000018906	P4ha2	protein_coding	11	54100095	54131665	procollagen-proline, 2-oxoglutarate 4-dioxygenase (proline 4-hydroxylase), alpha II polypeptide [Source:MGI Symbol;Acc:MGI:894286]	2.32945	1.36306	25.8109	3.76557e-07	9.90541e-06
201	ENSMUSG00000018924.6	ENSMUSG00000018924	Alox15	protein_coding	11	70344152	70352031	arachidonate 15-lipoxygenase [Source:MGI Symbol;Acc:MGI:87997]	4.08816	2.30044	11.5881	0.000663742	0.00720914
202	ENSMUSG00000018925.3	ENSMUSG00000018925	Heatr9	protein_coding	11	83511736	83522175	HEAT repeat containing 9 [Source:MGI Symbol;Acc:MGI:3650286]	4.14184	1.15193	31.5911	1.90299e-08	6.47869e-07
203	ENSMUSG00000019055.15	ENSMUSG00000019055	Plod1	protein_coding	4	147909753	147936767	procollagen-lysine, 2-oxoglutarate 5-dioxygenase 1 [Source:MGI Symbol;Acc:MGI:99907]	1.2665	4.08651	20.232	6.85957e-06	0.000134206
204	ENSMUSG00000019066.13	ENSMUSG00000019066	Rab3d	protein_coding	9	21907491	21918192	RAB3D, member RAS oncogene family [Source:MGI Symbol;Acc:MGI:97844]	0.968619	5.96081	15.4875	8.30525e-05	0.00120808
205	ENSMUSG00000019302.16	ENSMUSG00000019302	Atp6v0a1	protein_coding	11	101009452	101063719	ATPase, H+ transporting, lysosomal V0 subunit A1 [Source:MGI Symbol;Acc:MGI:103286]	1.7234	6.57526	25.9503	3.50328e-07	9.28886e-06
206	ENSMUSG00000019312.10	ENSMUSG00000019312	Grb7	protein_coding	11	98446394	98455373	growth factor receptor bound protein 7 [Source:MGI Symbol;Acc:MGI:102683]	2.50244	1.45242	22.8778	1.7263e-06	3.97975e-05
207	ENSMUSG00000019461.12	ENSMUSG00000019461	Plscr3	protein_coding	11	69846376	69852058	phospholipid scramblase 3 [Source:MGI Symbol;Acc:MGI:1917560]	-0.798865	6.60131	10.6599	0.00109486	0.0109172
208	ENSMUSG00000019539.11	ENSMUSG00000019539	Rcn3	protein_coding	7	45082913	45092221	reticulocalbin 3, EF-hand calcium binding domain [Source:MGI Symbol;Acc:MGI:1277122]	-1.30419	4.25674	14.688	0.000126853	0.00173404
209	ENSMUSG00000019564.12	ENSMUSG00000019564	Arid3a	protein_coding	10	79927043	79955018	AT rich interactive domain 3A (BRIGHT-like) [Source:MGI Symbol;Acc:MGI:1328360]	1.78207	5.95267	30.0179	4.28087e-08	1.37016e-06
210	ENSMUSG00000019647.16	ENSMUSG00000019647	Sema6a	protein_coding	18	47235598	47368870	sema domain, transmembrane domain (TM), and cytoplasmic domain, (semaphorin) 6A [Source:MGI Symbol;Acc:MGI:1203727]	2.8746	-1.73149	8.85353	0.00292522	0.0244965
211	ENSMUSG00000019659.8	ENSMUSG00000019659	Ccdc12	protein_coding	9	110656503	110711606	coiled-coil domain containing 12 [Source:MGI Symbol;Acc:MGI:1919904]	-1.04879	5.27912	12.6787	0.000369851	0.00434938
212	ENSMUSG00000019817.18	ENSMUSG00000019817	Plagl1	protein_coding	10	13060504	13131694	pleiomorphic adenoma gene-like 1 [Source:MGI Symbol;Acc:MGI:1100874]	2.27445	0.539358	14.0235	0.000180544	0.002351
213	ENSMUSG00000019836.5	ENSMUSG00000019836	Amd-ps4	processed_pseudogene	4	51253025	51254027	S-adenosylmethionine decarboxylase, pseudogene 4 [Source:MGI Symbol;Acc:MGI:3650439]	5.96807	-0.778874	46.9825	7.16226e-12	4.3324e-10
214	ENSMUSG00000019846.11	ENSMUSG00000019846	Lama4	protein_coding	10	38965515	39110188	laminin, alpha 4 [Source:MGI Symbol;Acc:MGI:109321]	1.37642	0.900077	10.9761	0.000922934	0.00950319
215	ENSMUSG00000019866.14	ENSMUSG00000019866	Crybg1	protein_coding	10	43950636	44148853	crystallin beta-gamma domain containing 1 [Source:MGI Symbol;Acc:MGI:109544]	1.00859	3.9092	10.1794	0.00142017	0.0135052
216	ENSMUSG00000019873.8	ENSMUSG00000019873	Reep3	protein_coding	10	67009189	67096945	receptor accessory protein 3 [Source:MGI Symbol;Acc:MGI:88930]	0.630376	5.71493	8.62064	0.00332375	0.0271556
217	ENSMUSG00000019935.16	ENSMUSG00000019935	Slc17a8	protein_coding	10	89574020	89621253	solute carrier family 17 (sodium-dependent inorganic phosphate cotransporter), member 8 [Source:MGI Symbol;Acc:MGI:3039629]	2.19688	2.71332	22.0427	2.66659e-06	5.7708e-05
218	ENSMUSG00000019944.14	ENSMUSG00000019944	Rhobtb1	protein_coding	10	69151434	69291791	Rho-related BTB domain containing 1 [Source:MGI Symbol;Acc:MGI:1916538]	0.838579	4.7602	7.75001	0.00537124	0.0394516
219	ENSMUSG00000019945.10	ENSMUSG00000019945	Cabcoco1	protein_coding	10	68430953	68541896	ciliary associated calcium binding coiled-coil 1 [Source:MGI Symbol;Acc:MGI:1920537]	-1.27966	2.1848	9.74782	0.00179535	0.0164687
220	ENSMUSG00000019987.9	ENSMUSG00000019987	Arg1	protein_coding	10	24915221	24927484	arginase, liver [Source:MGI Symbol;Acc:MGI:88070]	-2.86903	2.66085	17.578	2.75758e-05	0.000458361
221	ENSMUSG00000019992.8	ENSMUSG00000019992	Mtfr2	protein_coding	10	20347770	20361304	mitochondrial fission regulator 2 [Source:MGI Symbol;Acc:MGI:1919054]	-1.01999	5.35865	17.7127	2.569e-05	0.000429907
222	ENSMUSG00000019996.17	ENSMUSG00000019996	Map7	protein_coding	10	20148471	20281590	microtubule-associated protein 7 [Source:MGI Symbol;Acc:MGI:1328328]	-0.793115	6.16625	11.0421	0.000890671	0.00922857
223	ENSMUSG00000020003.16	ENSMUSG00000020003	Pex7	protein_coding	10	19853900	19907689	peroxisomal biogenesis factor 7 [Source:MGI Symbol;Acc:MGI:1321392]	-0.634748	5.27504	8.19754	0.00419472	0.032648
224	ENSMUSG00000020017.14	ENSMUSG00000020017	Hal	protein_coding	10	93488768	93519304	histidine ammonia lyase [Source:MGI Symbol;Acc:MGI:96010]	2.5234	0.32626	15.4521	8.46233e-05	0.00122806
225	ENSMUSG00000020019.4	ENSMUSG00000020019	Ntn4	protein_coding	10	93640681	93747207	netrin 4 [Source:MGI Symbol;Acc:MGI:1888978]	1.52384	1.23238	9.74746	0.00179571	0.0164687
226	ENSMUSG00000020021.4	ENSMUSG00000020021	Fgd6	protein_coding	10	94036001	94145339	FYVE, RhoGEF and PH domain containing 6 [Source:MGI Symbol;Acc:MGI:1261419]	2.09914	2.44142	19.9503	7.94821e-06	0.000152046
227	ENSMUSG00000020023.18	ENSMUSG00000020023	Tmcc3	protein_coding	10	94311949	94590956	transmembrane and coiled coil domains 3 [Source:MGI Symbol;Acc:MGI:2442900]	2.74611	3.82016	44.3738	2.71291e-11	1.48647e-09
228	ENSMUSG00000020027.18	ENSMUSG00000020027	Socs2	protein_coding	10	95385362	95417180	suppressor of cytokine signaling 2 [Source:MGI Symbol;Acc:MGI:1201787]	1.52893	4.7857	17.877	2.35651e-05	0.000399073
229	ENSMUSG00000020029.6	ENSMUSG00000020029	Nudt4	protein_coding	10	95547007	95564146	nudix (nucleoside diphosphate linked moiety X)-type motif 4 [Source:MGI Symbol;Acc:MGI:1918457]	0.623399	6.30499	7.29734	0.00690567	0.0480289
230	ENSMUSG00000020044.13	ENSMUSG00000020044	Timp3	protein_coding	10	86300372	86349506	tissue inhibitor of metalloproteinase 3 [Source:MGI Symbol;Acc:MGI:98754]	1.32702	2.72172	10.4617	0.00121878	0.0119285
231	ENSMUSG00000020048.13	ENSMUSG00000020048	Hsp90b1	protein_coding	10	86690209	86705509	heat shock protein 90, beta (Grp94), member 1 [Source:MGI Symbol;Acc:MGI:98817]	1.5785	9.62239	10.4967	0.00119585	0.0117765
232	ENSMUSG00000020053.18	ENSMUSG00000020053	Igf1	protein_coding	10	87858265	87937042	insulin-like growth factor 1 [Source:MGI Symbol;Acc:MGI:96432]	3.37308	1.59527	49.4491	2.03582e-12	1.33339e-10
233	ENSMUSG00000020083.13	ENSMUSG00000020083	Fam241b	protein_coding	10	62107655	62143920	family with sequence similarity 241, member B [Source:MGI Symbol;Acc:MGI:1917144]	1.19739	1.49986	7.48409	0.00622464	0.0442998
234	ENSMUSG00000020101.14	ENSMUSG00000020101	Vsir	protein_coding	10	60346851	60372684	V-set immunoregulatory receptor [Source:MGI Symbol;Acc:MGI:1921298]	1.39284	6.81869	10.2302	0.00138157	0.0132188
235	ENSMUSG00000020142.12	ENSMUSG00000020142	Slc1a4	protein_coding	11	20302180	20332713	solute carrier family 1 (glutamate/neutral amino acid transporter), member 4 [Source:MGI Symbol;Acc:MGI:2135601]	1.17312	2.05137	7.59818	0.00584273	0.0421324
236	ENSMUSG00000020154.10	ENSMUSG00000020154	Ptprb	protein_coding	10	116275523	116389535	protein tyrosine phosphatase, receptor type, B [Source:MGI Symbol;Acc:MGI:97809]	2.24439	-0.580872	8.7404	0.00311237	0.0257699
237	ENSMUSG00000020160.18	ENSMUSG00000020160	Meis1	protein_coding	11	18879817	19018985	Meis homeobox 1 [Source:MGI Symbol;Acc:MGI:104717]	-0.917899	7.2856	11.7163	0.000619555	0.0067781
238	ENSMUSG00000020180.10	ENSMUSG00000020180	Snrpd3	protein_coding	10	75517551	75537381	small nuclear ribonucleoprotein D3 [Source:MGI Symbol;Acc:MGI:1914582]	-0.68841	6.33347	8.49883	0.00355376	0.0286794
239	ENSMUSG00000020182.16	ENSMUSG00000020182	Ddc	protein_coding	11	11814101	11898144	dopa decarboxylase [Source:MGI Symbol;Acc:MGI:94876]	2.68208	0.623443	28.2177	1.08409e-07	3.1959e-06
240	ENSMUSG00000020205.8	ENSMUSG00000020205	Phlda1	protein_coding	10	111506286	111508645	pleckstrin homology like domain, family A, member 1 [Source:MGI Symbol;Acc:MGI:1096880]	1.53856	3.18643	7.72311	0.00545185	0.0398756
241	ENSMUSG00000020246.13	ENSMUSG00000020246	Hcfc2	protein_coding	10	82696160	82742428	host cell factor C2 [Source:MGI Symbol;Acc:MGI:1915183]	0.668955	5.06238	8.46799	0.00361451	0.0290749
242	ENSMUSG00000020256.14	ENSMUSG00000020256	Aldh1l2	protein_coding	10	83487450	83534140	aldehyde dehydrogenase 1 family, member L2 [Source:MGI Symbol;Acc:MGI:2444680]	3.1613	2.54077	18.3251	1.86239e-05	0.000325138
243	ENSMUSG00000020267.6	ENSMUSG00000020267	Hint1	protein_coding	11	54866383	54870501	histidine triad nucleotide binding protein 1 [Source:MGI Symbol;Acc:MGI:1321133]	-0.736242	6.81546	7.91475	0.00490333	0.0366684
244	ENSMUSG00000020268.13	ENSMUSG00000020268	Lyrm7	protein_coding	11	54826866	54860916	LYR motif containing 7 [Source:MGI Symbol;Acc:MGI:1922780]	2.08919	2.99919	35.533	2.50765e-09	1.00816e-07
245	ENSMUSG00000020282.18	ENSMUSG00000020282	Rhbdf1	protein_coding	11	32209585	32222300	rhomboid 5 homolog 1 [Source:MGI Symbol;Acc:MGI:104328]	1.40552	3.96359	16.8189	4.11217e-05	0.000651231
246	ENSMUSG00000020297.10	ENSMUSG00000020297	Nsg2	protein_coding	11	32000463	32059202	neuron specific gene family member 2 [Source:MGI Symbol;Acc:MGI:1202070]	2.26432	3.54434	40.3248	2.15065e-10	1.02259e-08
247	ENSMUSG00000020300.14	ENSMUSG00000020300	Cpeb4	protein_coding	11	31872211	31935634	cytoplasmic polyadenylation element binding protein 4 [Source:MGI Symbol;Acc:MGI:1914829]	1.05003	5.14557	13.1747	0.000283752	0.00346886
248	ENSMUSG00000020303.2	ENSMUSG00000020303	Stc2	protein_coding	11	31357307	31370074	stanniocalcin 2 [Source:MGI Symbol;Acc:MGI:1316731]	2.11969	0.673542	18.4768	1.71984e-05	0.000303464
249	ENSMUSG00000020333.17	ENSMUSG00000020333	Acsl6	protein_coding	11	54303798	54364756	acyl-CoA synthetase long-chain family member 6 [Source:MGI Symbol;Acc:MGI:894291]	-4.79721	-1.17279	24.4566	7.60043e-07	1.89657e-05
250	ENSMUSG00000020376.16	ENSMUSG00000020376	Rnf130	protein_coding	11	50025346	50104758	ring finger protein 130 [Source:MGI Symbol;Acc:MGI:1891717]	-0.822456	7.18892	10.6862	0.00107937	0.0108101
251	ENSMUSG00000020377.15	ENSMUSG00000020377	Ltc4s	protein_coding	11	50236461	50238616	leukotriene C4 synthase [Source:MGI Symbol;Acc:MGI:107498]	-1.42072	0.738897	11.5649	0.000672086	0.00727633
252	ENSMUSG00000020395.13	ENSMUSG00000020395	Itk	protein_coding	11	46325150	46389515	IL2 inducible T cell kinase [Source:MGI Symbol;Acc:MGI:96621]	1.56577	5.03953	7.94327	0.00482665	0.0362182
253	ENSMUSG00000020396.8	ENSMUSG00000020396	Nefh	protein_coding	11	4938754	4948064	neurofilament, heavy polypeptide [Source:MGI Symbol;Acc:MGI:97309]	-1.07027	4.18791	12.5626	0.000393549	0.00458292
254	ENSMUSG00000020401.6	ENSMUSG00000020401	Fam71b	protein_coding	11	46396559	46407982	family with sequence similarity 71, member B [Source:MGI Symbol;Acc:MGI:3650836]	3.26845	0.955067	26.6686	2.4152e-07	6.68148e-06
255	ENSMUSG00000020419.11	ENSMUSG00000020419	Hormad2	protein_coding	11	4345814	4441105	HORMA domain containing 2 [Source:MGI Symbol;Acc:MGI:1923078]	1.78166	1.89514	14.8016	0.000119433	0.00164626
256	ENSMUSG00000020423.6	ENSMUSG00000020423	Btg2	protein_coding	1	134075170	134079120	B cell translocation gene 2, anti-proliferative [Source:MGI Symbol;Acc:MGI:108384]	0.974977	7.75879	7.52618	0.00608086	0.0434693
257	ENSMUSG00000020447.5	ENSMUSG00000020447	Npc1l1	protein_coding	11	6211013	6230143	NPC1 like intracellular cholesterol transporter 1 [Source:MGI Symbol;Acc:MGI:2685089]	2.44478	-2.18937	7.64975	0.00567802	0.0411849
258	ENSMUSG00000020448.16	ENSMUSG00000020448	Rnf185	protein_coding	11	3415982	3452363	ring finger protein 185 [Source:MGI Symbol;Acc:MGI:1922078]	0.632774	4.9093	7.40231	0.00651401	0.0459184
259	ENSMUSG00000020474.11	ENSMUSG00000020474	Polm	protein_coding	11	5827860	5838016	polymerase (DNA directed), mu [Source:MGI Symbol;Acc:MGI:1860191]	1.97236	4.10658	14.8325	0.000117491	0.00162175
260	ENSMUSG00000020475.3	ENSMUSG00000020475	Pgam2	protein_coding	11	5801640	5803733	phosphoglycerate mutase 2 [Source:MGI Symbol;Acc:MGI:1933118]	2.01962	2.769	20.9182	4.79317e-06	9.66451e-05
261	ENSMUSG00000020482.4	ENSMUSG00000020482	Ccdc117	protein_coding	11	5528887	5542187	coiled-coil domain containing 117 [Source:MGI Symbol;Acc:MGI:2144383]	0.893437	6.59439	16.9168	3.90535e-05	0.000622464
262	ENSMUSG00000020484.18	ENSMUSG00000020484	Xbp1	protein_coding	11	5520659	5525893	X-box binding protein 1 [Source:MGI Symbol;Acc:MGI:98970]	2.85185	9.5219	26.0702	3.29233e-07	8.80031e-06
263	ENSMUSG00000020491.15	ENSMUSG00000020491	2810021J22Rik	protein_coding	11	58867216	58883288	RIKEN cDNA 2810021J22 gene [Source:MGI Symbol;Acc:MGI:1917194]	1.26898	3.13439	16.4172	5.0821e-05	0.000784839
264	ENSMUSG00000020528.14	ENSMUSG00000020528	Prpsap2	protein_coding	11	61729650	61762088	phosphoribosyl pyrophosphate synthetase-associated protein 2 [Source:MGI Symbol;Acc:MGI:2384838]	-0.666331	4.81775	7.60583	0.00581797	0.0419692
265	ENSMUSG00000020546.14	ENSMUSG00000020546	Stxbp4	protein_coding	11	90476492	90638084	syntaxin binding protein 4 [Source:MGI Symbol;Acc:MGI:1342296]	-1.96865	5.78513	66.4242	3.63607e-16	3.80537e-14
266	ENSMUSG00000020553.8	ENSMUSG00000020553	Pctp	protein_coding	11	89982665	90002894	phosphatidylcholine transfer protein [Source:MGI Symbol;Acc:MGI:107375]	-1.04899	4.55981	16.0954	6.02295e-05	0.000905273
267	ENSMUSG00000020576.10	ENSMUSG00000020576	Nbas	protein_coding	12	13269133	13583811	neuroblastoma amplified sequence [Source:MGI Symbol;Acc:MGI:1918419]	0.7264	5.72753	8.00623	0.00466166	0.0351938
268	ENSMUSG00000020592.14	ENSMUSG00000020592	Sdc1	protein_coding	12	8771323	8793715	syndecan 1 [Source:MGI Symbol;Acc:MGI:1349162]	2.20353	7.44834	40.8166	1.6721e-10	8.06688e-09
269	ENSMUSG00000020604.13	ENSMUSG00000020604	Arsg	protein_coding	11	109473374	109573330	arylsulfatase G [Source:MGI Symbol;Acc:MGI:1921258]	1.17935	2.70657	9.25923	0.00234312	0.0205074
270	ENSMUSG00000020620.14	ENSMUSG00000020620	Abca8b	protein_coding	11	109932190	109995845	ATP-binding cassette, sub-family A (ABC1), member 8b [Source:MGI Symbol;Acc:MGI:1351668]	3.67327	0.954272	37.6282	8.55973e-10	3.75413e-08
271	ENSMUSG00000020628.16	ENSMUSG00000020628	Trappc12	protein_coding	12	28690628	28750472	trafficking protein particle complex 12 [Source:MGI Symbol;Acc:MGI:2445089]	-0.674635	5.83801	11.1645	0.000833777	0.00871676
272	ENSMUSG00000020642.13	ENSMUSG00000020642	Rnf144a	protein_coding	12	26300964	26415254	ring finger protein 144A [Source:MGI Symbol;Acc:MGI:1344401]	-0.97354	6.49337	14.7988	0.000119612	0.00164708
273	ENSMUSG00000020644.9	ENSMUSG00000020644	Id2	protein_coding	12	25093799	25097140	inhibitor of DNA binding 2 [Source:MGI Symbol;Acc:MGI:96397]	1.51177	5.55694	14.6275	0.000130989	0.00178196
274	ENSMUSG00000020681.14	ENSMUSG00000020681	Ace	protein_coding	11	105967945	105989964	angiotensin I converting enzyme (peptidyl-dipeptidase A) 1 [Source:MGI Symbol;Acc:MGI:87874]	3.25618	2.42472	12.5158	0.000403521	0.00468132
275	ENSMUSG00000020709.15	ENSMUSG00000020709	Adap2	protein_coding	11	80154105	80178958	ArfGAP with dual PH domains 2 [Source:MGI Symbol;Acc:MGI:2663075]	2.3283	-0.334835	17.9953	2.21453e-05	0.000378595
276	ENSMUSG00000020712.11	ENSMUSG00000020712	Tcam1	protein_coding	11	106276672	106288745	testicular cell adhesion molecule 1 [Source:MGI Symbol;Acc:MGI:1923120]	-1.08485	3.14908	8.56571	0.00342553	0.0278721
277	ENSMUSG00000020798.14	ENSMUSG00000020798	Spns3	protein_coding	11	72494919	72550506	spinster homolog 3 [Source:MGI Symbol;Acc:MGI:1924827]	-0.663108	6.03437	10.1954	0.00140789	0.0134078
278	ENSMUSG00000020808.3	ENSMUSG00000020808	Pimreg	protein_coding	11	72042032	72047370	PICALM interacting mitotic regulator [Source:MGI Symbol;Acc:MGI:1924434]	-1.04275	4.89878	13.6469	0.000220604	0.00280074
279	ENSMUSG00000020810.5	ENSMUSG00000020810	Cygb	protein_coding	11	116645595	116654313	cytoglobin [Source:MGI Symbol;Acc:MGI:2149481]	6.08223	1.18273	100.156	1.40837e-23	3.16563e-21
280	ENSMUSG00000020811.16	ENSMUSG00000020811	Wscd1	protein_coding	11	71749920	71789647	WSC domain containing 1 [Source:MGI Symbol;Acc:MGI:2448493]	2.22231	-2.00038	10.0827	0.00149666	0.0140837
281	ENSMUSG00000020814.13	ENSMUSG00000020814	Mxra7	protein_coding	11	116803062	116828046	matrix-remodelling associated 7 [Source:MGI Symbol;Acc:MGI:1914872]	2.33644	0.144928	16.7485	4.26766e-05	0.0006741
282	ENSMUSG00000020821.17	ENSMUSG00000020821	Kif1c	protein_coding	11	70700548	70731964	kinesin family member 1C [Source:MGI Symbol;Acc:MGI:1098260]	0.712703	5.58824	10.9154	0.000953705	0.00977424
283	ENSMUSG00000020866.17	ENSMUSG00000020866	Cacna1g	protein_coding	11	94408391	94474198	calcium channel, voltage-dependent, T type, alpha 1G subunit [Source:MGI Symbol;Acc:MGI:1201678]	2.22191	1.07782	10.6096	0.001125	0.0111598
284	ENSMUSG00000020877.11	ENSMUSG00000020877	Scrn2	protein_coding	11	97029938	97033958	secernin 2 [Source:MGI Symbol;Acc:MGI:1343092]	-0.783323	4.40346	7.61858	0.00577698	0.0417191
285	ENSMUSG00000020884.15	ENSMUSG00000020884	Asgr1	protein_coding	11	70054085	70057894	asialoglycoprotein receptor 1 [Source:MGI Symbol;Acc:MGI:88081]	-3.48606	-1.49273	18.9598	1.335e-05	0.000242481
286	ENSMUSG00000020891.11	ENSMUSG00000020891	Alox8	protein_coding	11	69183932	69197843	arachidonate 8-lipoxygenase [Source:MGI Symbol;Acc:MGI:1098228]	2.03984	-1.99611	8.07264	0.00449386	0.0342785
287	ENSMUSG00000020898.18	ENSMUSG00000020898	Ctc1	protein_coding	11	69015911	69036473	CTS telomere maintenance complex component 1 [Source:MGI Symbol;Acc:MGI:1916214]	-0.591293	6.30342	7.48365	0.00622616	0.0442998
288	ENSMUSG00000020900.15	ENSMUSG00000020900	Myh10	protein_coding	11	68691559	68816632	myosin, heavy polypeptide 10, non-muscle [Source:MGI Symbol;Acc:MGI:1930780]	1.24812	4.57771	17.5203	2.8426e-05	0.000470516
289	ENSMUSG00000020901.13	ENSMUSG00000020901	Pik3r5	protein_coding	11	68432121	68497849	phosphoinositide-3-kinase regulatory subunit 5 [Source:MGI Symbol;Acc:MGI:2443588]	1.095	5.13427	11.2669	0.000789017	0.00831473
290	ENSMUSG00000020908.14	ENSMUSG00000020908	Myh3	protein_coding	11	67078300	67102291	myosin, heavy polypeptide 3, skeletal muscle, embryonic [Source:MGI Symbol;Acc:MGI:1339709]	5.03752	-1.23909	45.3029	1.68796e-11	9.5122e-10
291	ENSMUSG00000020911.14	ENSMUSG00000020911	Krt19	protein_coding	11	100140810	100148665	keratin 19 [Source:MGI Symbol;Acc:MGI:96693]	-3.70722	-1.75851	8.13154	0.00435017	0.0335202
292	ENSMUSG00000020926.16	ENSMUSG00000020926	Adam11	protein_coding	11	102761439	102780262	a disintegrin and metallopeptidase domain 11 [Source:MGI Symbol;Acc:MGI:1098667]	0.717875	6.44567	7.63761	0.00571636	0.0414023
293	ENSMUSG00000020932.14	ENSMUSG00000020932	Gfap	protein_coding	11	102887336	102900912	glial fibrillary acidic protein [Source:MGI Symbol;Acc:MGI:95697]	1.79139	1.35873	18.4631	1.7323e-05	0.000304862
294	ENSMUSG00000020937.14	ENSMUSG00000020937	Plcd3	protein_coding	11	103070304	103101658	phospholipase C, delta 3 [Source:MGI Symbol;Acc:MGI:107451]	2.50126	2.40242	20.8039	5.08785e-06	0.000101552
295	ENSMUSG00000020949.9	ENSMUSG00000020949	Fkbp3	protein_coding	12	65062424	65074007	FK506 binding protein 3 [Source:MGI Symbol;Acc:MGI:1353460]	-0.763414	6.22147	11.5872	0.000664057	0.00720914
296	ENSMUSG00000020964.14	ENSMUSG00000020964	Sel1l	protein_coding	12	91806043	91849157	sel-1 suppressor of lin-12-like (C. elegans) [Source:MGI Symbol;Acc:MGI:1329016]	3.14534	9.33414	43.7749	3.68395e-11	1.96942e-09
297	ENSMUSG00000021054.6	ENSMUSG00000021054	Sgpp1	protein_coding	12	75714249	75735729	sphingosine-1-phosphate phosphatase 1 [Source:MGI Symbol;Acc:MGI:2135760]	0.610162	5.62543	7.87412	0.00501472	0.0373018
298	ENSMUSG00000021061.15	ENSMUSG00000021061	Sptb	protein_coding	12	76580488	76710547	spectrin beta, erythrocytic [Source:MGI Symbol;Acc:MGI:98387]	1.82137	4.69986	8.54806	0.0034589	0.0280283
299	ENSMUSG00000021062.15	ENSMUSG00000021062	Rab15	protein_coding	12	76797960	76822908	RAB15, member RAS oncogene family [Source:MGI Symbol;Acc:MGI:1916865]	2.08813	0.632789	18.4289	1.76362e-05	0.000309809
300	ENSMUSG00000021098.14	ENSMUSG00000021098	4930447C04Rik	protein_coding	12	72881109	72940774	RIKEN cDNA 4930447C04 gene [Source:MGI Symbol;Acc:MGI:1923051]	-1.0991	2.90336	9.69527	0.00184743	0.016863
301	ENSMUSG00000021113.5	ENSMUSG00000021113	Snapc1	protein_coding	12	73964481	73988966	small nuclear RNA activating complex, polypeptide 1 [Source:MGI Symbol;Acc:MGI:1922877]	-0.721756	4.40476	8.88974	0.00286777	0.0241186
302	ENSMUSG00000021127.7	ENSMUSG00000021127	Zfp36l1	protein_coding	12	80107754	80113013	zinc finger protein 36, C3H type-like 1 [Source:MGI Symbol;Acc:MGI:107946]	1.85093	6.93776	35.1868	2.99553e-09	1.18741e-07
303	ENSMUSG00000021147.17	ENSMUSG00000021147	Wdr37	protein_coding	13	8802968	8871909	WD repeat domain 37 [Source:MGI Symbol;Acc:MGI:1920393]	0.625676	5.65408	8.631	0.0033049	0.0270351
304	ENSMUSG00000021176.6	ENSMUSG00000021176	Efcab11	protein_coding	12	99693045	99884439	EF-hand calcium binding domain 11 [Source:MGI Symbol;Acc:MGI:1926017]	-0.957058	2.05727	7.2261	0.0071851	0.0495887
305	ENSMUSG00000021187.14	ENSMUSG00000021187	Tc2n	protein_coding	12	101645443	101718523	tandem C2 domains, nuclear [Source:MGI Symbol;Acc:MGI:1921663]	-4.02384	-1.69423	26.2379	3.01846e-07	8.1453e-06
306	ENSMUSG00000021190.14	ENSMUSG00000021190	Lgmn	protein_coding	12	102394084	102439813	legumain [Source:MGI Symbol;Acc:MGI:1330838]	1.2095	4.76755	16.0016	6.32891e-05	0.000946227
307	ENSMUSG00000021194.6	ENSMUSG00000021194	Chga	protein_coding	12	102554969	102565028	chromogranin A [Source:MGI Symbol;Acc:MGI:88394]	-3.43926	0.23996	39.8569	2.73265e-10	1.28695e-08
308	ENSMUSG00000021196.14	ENSMUSG00000021196	Pfkp	protein_coding	13	6579768	6648777	phosphofructokinase, platelet [Source:MGI Symbol;Acc:MGI:1891833]	0.677899	6.38742	8.27017	0.00403017	0.031596
309	ENSMUSG00000021279.5	ENSMUSG00000021279	Cdc42bpb	protein_coding	12	111292976	111377718	CDC42 binding protein kinase beta [Source:MGI Symbol;Acc:MGI:2136459]	1.42983	5.43852	21.265	3.99959e-06	8.20664e-05
310	ENSMUSG00000021290.6	ENSMUSG00000021290	Atp5mpl	protein_coding	12	111961375	111966977	ATP synthase membrane subunit 6.8PL [Source:MGI Symbol;Acc:MGI:1917507]	-0.822202	5.42032	7.82824	0.00514361	0.0380505
311	ENSMUSG00000021294.7	ENSMUSG00000021294	Kif26a	protein_coding	12	112146208	112181747	kinesin family member 26A [Source:MGI Symbol;Acc:MGI:2447072]	3.19148	-1.77408	15.7774	7.12472e-05	0.00105405
312	ENSMUSG00000021298.8	ENSMUSG00000021298	Gpr132	protein_coding	12	112850873	112868228	G protein-coupled receptor 132 [Source:MGI Symbol;Acc:MGI:1890220]	-0.971438	6.27019	7.38987	0.00655924	0.0461879
313	ENSMUSG00000021319.7	ENSMUSG00000021319	Sfrp4	protein_coding	13	19623104	19632994	secreted frizzled-related protein 4 [Source:MGI Symbol;Acc:MGI:892010]	1.87704	-1.33961	9.18298	0.00244276	0.021192
314	ENSMUSG00000021322.8	ENSMUSG00000021322	Aoah	protein_coding	13	20794113	21036617	acyloxyacyl hydrolase [Source:MGI Symbol;Acc:MGI:1350928]	1.50359	3.28402	8.37581	0.00380247	0.030206
315	ENSMUSG00000021356.10	ENSMUSG00000021356	Irf4	protein_coding	13	30749226	30766976	interferon regulatory factor 4 [Source:MGI Symbol;Acc:MGI:1096873]	3.50262	7.48161	40.1167	2.39236e-10	1.13479e-08
316	ENSMUSG00000021360.16	ENSMUSG00000021360	Gcnt2	protein_coding	13	40859754	40960892	glucosaminyl (N-acetyl) transferase 2, I-branching enzyme [Source:MGI Symbol;Acc:MGI:1100870]	-1.06031	7.41286	15.041	0.000105203	0.00148319
317	ENSMUSG00000021365.15	ENSMUSG00000021365	Nedd9	protein_coding	13	41309581	41487362	neural precursor cell expressed, developmentally down-regulated gene 9 [Source:MGI Symbol;Acc:MGI:97302]	1.07096	5.73293	13.0708	0.000299939	0.0036353
318	ENSMUSG00000021403.3	ENSMUSG00000021403	Serpinb9b	protein_coding	13	33027416	33041884	serine (or cysteine) peptidase inhibitor, clade B, member 9b [Source:MGI Symbol;Acc:MGI:894668]	3.59538	-1.82229	15.3836	8.77468e-05	0.00126412
319	ENSMUSG00000021461.17	ENSMUSG00000021461	Fancc	protein_coding	13	63285043	63497278	Fanconi anemia, complementation group C [Source:MGI Symbol;Acc:MGI:95480]	-1.0061	3.99428	13.3415	0.000259601	0.0032214
320	ENSMUSG00000021476.9	ENSMUSG00000021476	Habp4	protein_coding	13	64161824	64186537	hyaluronic acid binding protein 4 [Source:MGI Symbol;Acc:MGI:1891713]	0.710169	4.11985	7.49167	0.00619851	0.0441348
321	ENSMUSG00000021589.13	ENSMUSG00000021589	Rhobtb3	protein_coding	13	75869537	75943925	Rho-related BTB domain containing 3 [Source:MGI Symbol;Acc:MGI:1920546]	-1.62792	4.77928	22.3175	2.3109e-06	5.11093e-05
322	ENSMUSG00000021610.8	ENSMUSG00000021610	Clptm1l	protein_coding	13	73604006	73620605	CLPTM1-like [Source:MGI Symbol;Acc:MGI:2442892]	1.17	7.63554	15.4873	8.3063e-05	0.00120808
323	ENSMUSG00000021614.16	ENSMUSG00000021614	Vcan	protein_coding	13	89655312	89742509	versican [Source:MGI Symbol;Acc:MGI:102889]	2.05507	0.977126	13.9412	0.000188618	0.00244487
324	ENSMUSG00000021619.6	ENSMUSG00000021619	Atg10	protein_coding	13	90935356	91223968	autophagy related 10 [Source:MGI Symbol;Acc:MGI:1914045]	-0.890187	2.97646	7.27771	0.00698155	0.0484034
325	ENSMUSG00000021624.9	ENSMUSG00000021624	Cd180	protein_coding	13	102693558	102739629	CD180 antigen [Source:MGI Symbol;Acc:MGI:1194924]	-0.898911	4.46536	10.3465	0.00129718	0.0125899
326	ENSMUSG00000021640.6	ENSMUSG00000021640	Naip1	protein_coding	13	100407764	100452869	NLR family, apoptosis inhibitory protein 1 [Source:MGI Symbol;Acc:MGI:1298223]	2.74582	-1.67445	15.4327	8.5498e-05	0.00123803
327	ENSMUSG00000021643.15	ENSMUSG00000021643	Serf1	protein_coding	13	100108012	100114571	small EDRK-rich factor 1 [Source:MGI Symbol;Acc:MGI:1337114]	-1.01335	2.66399	7.99817	0.00468248	0.0353374
328	ENSMUSG00000021670.14	ENSMUSG00000021670	Hmgcr	protein_coding	13	96648967	96670936	3-hydroxy-3-methylglutaryl-Coenzyme A reductase [Source:MGI Symbol;Acc:MGI:96159]	-0.764172	6.68632	12.4415	0.000419908	0.00484347
329	ENSMUSG00000021714.15	ENSMUSG00000021714	Cenpk	protein_coding	13	104228611	104252392	centromere protein K [Source:MGI Symbol;Acc:MGI:1926210]	-0.883263	3.65986	8.89884	0.00285352	0.0240284
330	ENSMUSG00000021730.8	ENSMUSG00000021730	Hcn1	protein_coding	13	117602320	117987418	hyperpolarization-activated, cyclic nucleotide-gated K+ 1 [Source:MGI Symbol;Acc:MGI:1096392]	-5.14395	-1.01528	32.8233	1.00928e-08	3.64297e-07
331	ENSMUSG00000021747.12	ENSMUSG00000021747	4930452B06Rik	protein_coding	14	8431192	8666240	RIKEN cDNA 4930452B06 gene [Source:MGI Symbol;Acc:MGI:1926154]	-1.80138	1.11315	9.12002	0.00252828	0.0217768
332	ENSMUSG00000021754.17	ENSMUSG00000021754	Map3k1	protein_coding	13	111746428	111808993	mitogen-activated protein kinase kinase kinase 1 [Source:MGI Symbol;Acc:MGI:1346872]	0.828341	7.06675	7.45839	0.00631414	0.0447808
333	ENSMUSG00000021756.12	ENSMUSG00000021756	Il6st	protein_coding	13	112464070	112510086	interleukin 6 signal transducer [Source:MGI Symbol;Acc:MGI:96560]	0.703975	6.90961	7.29097	0.00693019	0.0481537
334	ENSMUSG00000021758.14	ENSMUSG00000021758	Ddx4	protein_coding	13	112598333	112652475	DEAD (Asp-Glu-Ala-Asp) box polypeptide 4 [Source:MGI Symbol;Acc:MGI:102670]	-1.713	3.60382	16.9545	3.82855e-05	0.000612197
335	ENSMUSG00000021768.15	ENSMUSG00000021768	Dusp13	protein_coding	14	21733394	21751181	dual specificity phosphatase 13 [Source:MGI Symbol;Acc:MGI:1351599]	5.69852	-2.66763	13.5714	0.00022966	0.00289527
336	ENSMUSG00000021770.11	ENSMUSG00000021770	Samd8	protein_coding	14	21750531	21798726	sterile alpha motif domain containing 8 [Source:MGI Symbol;Acc:MGI:1914880]	1.29342	5.0276	24.6629	6.82853e-07	1.72281e-05
337	ENSMUSG00000021779.17	ENSMUSG00000021779	Thrb	protein_coding	14	17660261	18038090	thyroid hormone receptor beta [Source:MGI Symbol;Acc:MGI:98743]	1.08961	2.28054	8.1195	0.00437915	0.0336779
338	ENSMUSG00000021807.6	ENSMUSG00000021807	Rtraf	protein_coding	14	19811351	19823824	RNA transcription, translation and transport factor [Source:MGI Symbol;Acc:MGI:1915295]	-0.934026	6.14252	12.6739	0.000370805	0.004358
339	ENSMUSG00000021831.9	ENSMUSG00000021831	Ero1l	protein_coding	14	45283087	45318771	ERO1-like (S. cerevisiae) [Source:MGI Symbol;Acc:MGI:1354385]	0.647865	5.32579	7.74126	0.00539732	0.0396137
340	ENSMUSG00000021903.11	ENSMUSG00000021903	Galnt15	protein_coding	14	32028989	32062197	polypeptide N-acetylgalactosaminyltransferase 15 [Source:MGI Symbol;Acc:MGI:1926004]	3.8471	-1.57317	9.00325	0.002695	0.0229278
341	ENSMUSG00000021908.10	ENSMUSG00000021908	Gm6768	processed_pseudogene	12	119260978	119262855	predicted gene 6768 [Source:MGI Symbol;Acc:MGI:3648259]	4.59074	2.40145	83.4323	6.59349e-20	1.03507e-17
342	ENSMUSG00000021913.8	ENSMUSG00000021913	Ogdhl	protein_coding	14	32322019	32348151	oxoglutarate dehydrogenase-like [Source:MGI Symbol;Acc:MGI:3616088]	-2.18591	-2.08165	8.34265	0.0038725	0.0306147
343	ENSMUSG00000021932.13	ENSMUSG00000021932	Rnaseh2b	protein_coding	14	62292589	62372992	ribonuclease H2, subunit B [Source:MGI Symbol;Acc:MGI:1914403]	-0.89454	5.26596	14.0255	0.000180348	0.00235071
344	ENSMUSG00000021933.11	ENSMUSG00000021933	Gucy1b2	protein_coding	14	62392676	62456289	guanylate cyclase 1, soluble, beta 2 [Source:MGI Symbol;Acc:MGI:2660873]	2.98451	-0.983982	21.5212	3.49946e-06	7.3188e-05
345	ENSMUSG00000021965.3	ENSMUSG00000021965	Ska3	protein_coding	14	57806561	57826185	spindle and kinetochore associated complex subunit 3 [Source:MGI Symbol;Acc:MGI:3041235]	-0.747014	4.39869	8.41655	0.0037182	0.0297276
346	ENSMUSG00000021990.15	ENSMUSG00000021990	Spata13	protein_coding	14	60634001	60764556	spermatogenesis associated 13 [Source:MGI Symbol;Acc:MGI:104838]	0.98226	6.45946	19.9164	8.09044e-06	0.000154468
347	ENSMUSG00000022014.15	ENSMUSG00000022014	Epsti1	protein_coding	14	77904239	78002657	epithelial stromal interaction 1 (breast) [Source:MGI Symbol;Acc:MGI:1915168]	-0.612943	5.68685	7.36556	0.00664848	0.0466667
348	ENSMUSG00000022070.7	ENSMUSG00000022070	Bora	protein_coding	14	99046222	99074540	bora, aurora kinase A activator [Source:MGI Symbol;Acc:MGI:1924994]	-0.606733	5.56953	8.63945	0.00328961	0.0269546
349	ENSMUSG00000022092.11	ENSMUSG00000022092	Ppp3cc	protein_coding	14	70217865	70289471	protein phosphatase 3, catalytic subunit, gamma isoform [Source:MGI Symbol;Acc:MGI:107162]	1.06802	5.35178	22.9202	1.68865e-06	3.90206e-05
350	ENSMUSG00000022136.8	ENSMUSG00000022136	Dnajc3	protein_coding	14	118937976	118981697	DnaJ heat shock protein family (Hsp40) member C3 [Source:MGI Symbol;Acc:MGI:107373]	1.2937	7.90835	19.3417	1.09295e-05	0.000202043
351	ENSMUSG00000022177.9	ENSMUSG00000022177	Haus4	protein_coding	14	54541785	54554616	HAUS augmin-like complex, subunit 4 [Source:MGI Symbol;Acc:MGI:1261794]	-0.992683	5.92535	17.3751	3.06825e-05	0.000501181
352	ENSMUSG00000022180.7	ENSMUSG00000022180	Slc7a8	protein_coding	14	54722209	54781946	solute carrier family 7 (cationic amino acid transporter, y+ system), member 8 [Source:MGI Symbol;Acc:MGI:1355323]	1.25402	5.08555	30.8198	2.83128e-08	9.31826e-07
353	ENSMUSG00000022193.7	ENSMUSG00000022193	Psmb5	protein_coding	14	54614119	54618022	proteasome (prosome, macropain) subunit, beta type 5 [Source:MGI Symbol;Acc:MGI:1194513]	-1.24711	4.36239	19.5714	9.69115e-06	0.000181354
354	ENSMUSG00000022221.14	ENSMUSG00000022221	Ripk3	protein_coding	14	55784995	55788865	receptor-interacting serine-threonine kinase 3 [Source:MGI Symbol;Acc:MGI:2154952]	-0.719699	5.9043	10.2578	0.00136104	0.0130687
355	ENSMUSG00000022225.7	ENSMUSG00000022225	Cma1	protein_coding	14	55941451	55944675	chymase 1, mast cell [Source:MGI Symbol;Acc:MGI:96941]	4.41729	-1.77658	23.6149	1.17675e-06	2.80772e-05
356	ENSMUSG00000022240.10	ENSMUSG00000022240	Ctnnd2	protein_coding	15	30172593	31029341	catenin (cadherin associated protein), delta 2 [Source:MGI Symbol;Acc:MGI:1195966]	1.2754	3.50535	12.4283	0.000422866	0.00486862
357	ENSMUSG00000022270.16	ENSMUSG00000022270	Retreg1	protein_coding	15	25843180	25973687	reticulophagy regulator 1 [Source:MGI Symbol;Acc:MGI:1913520]	-0.628352	6.40136	8.62578	0.00331439	0.0271012
358	ENSMUSG00000022324.15	ENSMUSG00000022324	Matn2	protein_coding	15	34306677	34436273	matrilin 2 [Source:MGI Symbol;Acc:MGI:109613]	1.42347	2.902	13.6025	0.000225885	0.0028586
359	ENSMUSG00000022325.14	ENSMUSG00000022325	Pop1	protein_coding	15	34495304	34530648	processing of precursor 1, ribonuclease P/MRP family, (S. cerevisiae) [Source:MGI Symbol;Acc:MGI:1914974]	-0.861573	3.88085	8.92665	0.00281039	0.023736
360	ENSMUSG00000022351.14	ENSMUSG00000022351	Sqle	protein_coding	15	59315077	59331192	squalene epoxidase [Source:MGI Symbol;Acc:MGI:109296]	-0.9103	4.95077	10.8996	0.000961862	0.00984136
361	ENSMUSG00000022367.7	ENSMUSG00000022367	Has2	protein_coding	15	56665627	56694539	hyaluronan synthase 2 [Source:MGI Symbol;Acc:MGI:107821]	3.51243	-0.925096	12.2729	0.000459589	0.00521853
362	ENSMUSG00000022371.16	ENSMUSG00000022371	Col14a1	protein_coding	15	55307750	55520803	collagen, type XIV, alpha 1 [Source:MGI Symbol;Acc:MGI:1341272]	2.69398	-0.497666	19.3961	1.06226e-05	0.000197106
363	ENSMUSG00000022383.13	ENSMUSG00000022383	Ppara	protein_coding	15	85734983	85802819	peroxisome proliferator activated receptor alpha [Source:MGI Symbol;Acc:MGI:104740]	3.4297	-2.21865	12.9341	0.000322659	0.00387739
364	ENSMUSG00000022407.10	ENSMUSG00000022407	Adsl	protein_coding	15	80948490	80970946	adenylosuccinate lyase [Source:MGI Symbol;Acc:MGI:103202]	-0.650632	6.32717	8.77634	0.00305162	0.0253618
365	ENSMUSG00000022408.7	ENSMUSG00000022408	Fam83f	protein_coding	15	80671847	80700425	family with sequence similarity 83, member F [Source:MGI Symbol;Acc:MGI:2146227]	1.37345	-0.494556	7.86812	0.00503138	0.0373857
366	ENSMUSG00000022415.12	ENSMUSG00000022415	Syngr1	protein_coding	15	80091334	80119501	synaptogyrin 1 [Source:MGI Symbol;Acc:MGI:1328323]	1.17624	2.82712	10.4657	0.0012161	0.0119174
367	ENSMUSG00000022422.13	ENSMUSG00000022422	Dscc1	protein_coding	15	55076099	55090491	DNA replication and sister chromatid cohesion 1 [Source:MGI Symbol;Acc:MGI:1919357]	-0.821733	3.91023	8.40669	0.00373843	0.0298652
368	ENSMUSG00000022438.6	ENSMUSG00000022438	Parvb	protein_coding	15	84232043	84315688	parvin, beta [Source:MGI Symbol;Acc:MGI:2153063]	1.55965	4.07436	20.9657	4.67582e-06	9.47621e-05
369	ENSMUSG00000022456.16	ENSMUSG00000022456	43711	protein_coding	15	82274893	82294574	septin 3 [Source:MGI Symbol;Acc:MGI:1345148]	1.87177	0.7249	12.6801	0.000369571	0.00434867
370	ENSMUSG00000022468.12	ENSMUSG00000022468	Endou	protein_coding	15	97711015	97731339	endonuclease, polyU-specific [Source:MGI Symbol;Acc:MGI:97746]	1.16798	3.492	10.1707	0.00142687	0.0135599
371	ENSMUSG00000022469.17	ENSMUSG00000022469	Rapgef3	protein_coding	15	97744770	97767972	Rap guanine nucleotide exchange factor (GEF) 3 [Source:MGI Symbol;Acc:MGI:2441741]	1.64336	5.30881	23.6789	1.13823e-06	2.729e-05
372	ENSMUSG00000022471.14	ENSMUSG00000022471	Xrcc6	protein_coding	15	81987835	82040085	X-ray repair complementing defective repair in Chinese hamster cells 6 [Source:MGI Symbol;Acc:MGI:95606]	-1.19276	6.6681	30.4746	3.38275e-08	1.10051e-06
373	ENSMUSG00000022474.15	ENSMUSG00000022474	Pmm1	protein_coding	15	81951108	81960930	phosphomannomutase 1 [Source:MGI Symbol;Acc:MGI:1353418]	-1.09957	3.74307	11.4219	0.000725852	0.00775251
374	ENSMUSG00000022496.5	ENSMUSG00000022496	Tnfrsf17	protein_coding	16	11313812	11320074	tumor necrosis factor receptor superfamily, member 17 [Source:MGI Symbol;Acc:MGI:1343050]	2.62587	4.38142	10.2842	0.00134176	0.0129502
375	ENSMUSG00000022498.16	ENSMUSG00000022498	Txndc11	protein_coding	16	11074911	11134650	thioredoxin domain containing 11 [Source:MGI Symbol;Acc:MGI:1923620]	1.32666	7.02825	21.4068	3.7145e-06	7.69349e-05
376	ENSMUSG00000022512.3	ENSMUSG00000022512	Cldn1	protein_coding	16	26356642	26371841	claudin 1 [Source:MGI Symbol;Acc:MGI:1276109]	2.29996	1.17896	7.47225	0.00626571	0.0445063
377	ENSMUSG00000022537.18	ENSMUSG00000022537	Tmem44	protein_coding	16	30511855	30550842	transmembrane protein 44 [Source:MGI Symbol;Acc:MGI:1924489]	-1.18356	2.92818	11.7326	0.000614135	0.00672624
378	ENSMUSG00000022584.14	ENSMUSG00000022584	Ly6c2	protein_coding	15	75108158	75111970	lymphocyte antigen 6 complex, locus C2 [Source:MGI Symbol;Acc:MGI:3712069]	2.51414	7.91581	18.6449	1.57471e-05	0.000280358
379	ENSMUSG00000022586.11	ENSMUSG00000022586	Ly6i	protein_coding	15	74979534	74983430	lymphocyte antigen 6 complex, locus I [Source:MGI Symbol;Acc:MGI:1888480]	2.34773	0.943021	14.8742	0.000114922	0.00159631
380	ENSMUSG00000022621.16	ENSMUSG00000022621	Rabl2	protein_coding	15	89582533	89591923	RAB, member RAS oncogene family-like 2 [Source:MGI Symbol;Acc:MGI:1915958]	-1.12626	3.61524	13.5789	0.000228741	0.00288869
381	ENSMUSG00000022661.14	ENSMUSG00000022661	Cd200	protein_coding	16	45382135	45409053	CD200 antigen [Source:MGI Symbol;Acc:MGI:1196990]	1.05914	3.34704	9.21025	0.00240663	0.0209674
382	ENSMUSG00000022686.14	ENSMUSG00000022686	B3gnt5	protein_coding	16	19760208	19772753	UDP-GlcNAc:betaGal beta-1,3-N-acetylglucosaminyltransferase 5 [Source:MGI Symbol;Acc:MGI:2137302]	-0.82899	6.05152	8.94009	0.00278979	0.0236123
383	ENSMUSG00000022696.17	ENSMUSG00000022696	Sidt1	protein_coding	16	44240180	44333196	SID1 transmembrane family, member 1 [Source:MGI Symbol;Acc:MGI:2443155]	2.64718	2.68228	25.6063	4.18664e-07	1.09106e-05
384	ENSMUSG00000022701.18	ENSMUSG00000022701	Ccdc191	protein_coding	16	43889800	43964314	coiled-coil domain containing 191 [Source:MGI Symbol;Acc:MGI:1922661]	-0.701526	4.33677	7.62351	0.00576124	0.0416359
385	ENSMUSG00000022742.6	ENSMUSG00000022742	Cpox	protein_coding	16	58670292	58717636	coproporphyrinogen oxidase [Source:MGI Symbol;Acc:MGI:104841]	0.900352	5.89854	14.7572	0.000122279	0.00167876
386	ENSMUSG00000022762.18	ENSMUSG00000022762	Ncam2	protein_coding	16	81200697	81626828	neural cell adhesion molecule 2 [Source:MGI Symbol;Acc:MGI:97282]	2.0289	0.458141	13.7943	0.000203956	0.00262135
387	ENSMUSG00000022769.9	ENSMUSG00000022769	Sdf2l1	protein_coding	16	17130138	17132383	stromal cell-derived factor 2-like 1 [Source:MGI Symbol;Acc:MGI:2149842]	1.52017	6.17554	16.2886	5.43902e-05	0.000828205
388	ENSMUSG00000022818.13	ENSMUSG00000022818	Cyp2ab1	protein_coding	16	20308387	20325404	cytochrome P450, family 2, subfamily ab, polypeptide 1 [Source:MGI Symbol;Acc:MGI:3644957]	2.1628	-0.854876	8.12242	0.00437211	0.0336368
389	ENSMUSG00000022838.14	ENSMUSG00000022838	Eaf2	protein_coding	16	36792884	36875003	ELL associated factor 2 [Source:MGI Symbol;Acc:MGI:2146616]	3.0741	5.09531	16.8625	4.01879e-05	0.000636952
390	ENSMUSG00000022865.14	ENSMUSG00000022865	Cxadr	protein_coding	16	78301489	78359774	coxsackie virus and adenovirus receptor [Source:MGI Symbol;Acc:MGI:1201679]	1.32159	1.8471	11.6015	0.000658992	0.0071684
391	ENSMUSG00000022876.18	ENSMUSG00000022876	Samsn1	protein_coding	16	75858793	76022281	SAM domain, SH3 domain and nuclear localization signals, 1 [Source:MGI Symbol;Acc:MGI:1914992]	-0.798108	6.89854	13.648	0.000220481	0.00280074
392	ENSMUSG00000022885.16	ENSMUSG00000022885	St6gal1	protein_coding	16	23224740	23360350	beta galactoside alpha 2,6 sialyltransferase 1 [Source:MGI Symbol;Acc:MGI:108470]	2.06804	6.52978	54.1892	1.82083e-13	1.32412e-11
393	ENSMUSG00000022938.8	ENSMUSG00000022938	Fam3b	protein_coding	16	97470965	97514816	family with sequence similarity 3, member B [Source:MGI Symbol;Acc:MGI:1270150]	-1.69461	-0.852899	7.63605	0.0057213	0.0414229
394	ENSMUSG00000022945.12	ENSMUSG00000022945	Chaf1b	protein_coding	16	93883901	93906115	chromatin assembly factor 1, subunit B (p60) [Source:MGI Symbol;Acc:MGI:1314881]	-1.09946	5.97546	18.8347	1.42549e-05	0.000257499
395	ENSMUSG00000022948.16	ENSMUSG00000022948	Setd4	protein_coding	16	93583457	93604063	SET domain containing 4 [Source:MGI Symbol;Acc:MGI:2136890]	-0.930587	3.44799	9.60784	0.00193748	0.0175473
396	ENSMUSG00000022964.14	ENSMUSG00000022964	Tmem50b	protein_coding	16	91574503	91597800	transmembrane protein 50B [Source:MGI Symbol;Acc:MGI:1925225]	0.712268	5.04311	8.03975	0.0045762	0.0347208
397	ENSMUSG00000022995.16	ENSMUSG00000022995	Enah	protein_coding	1	181896384	182019990	ENAH actin regulator [Source:MGI Symbol;Acc:MGI:108360]	2.79544	2.61735	28.3722	1.0009e-07	2.96819e-06
398	ENSMUSG00000023031.8	ENSMUSG00000023031	Cela1	protein_coding	15	100674421	100687921	chymotrypsin-like elastase family, member 1 [Source:MGI Symbol;Acc:MGI:95314]	-1.34834	2.32853	9.2947	0.00229818	0.0201653
399	ENSMUSG00000023036.14	ENSMUSG00000023036	Pcdhgc4	protein_coding	18	37815079	37841873	protocadherin gamma subfamily C, 4 [Source:MGI Symbol;Acc:MGI:1935203]	-1.75048	0.128952	10.4509	0.00122588	0.0119802
400	ENSMUSG00000023072.14	ENSMUSG00000023072	Cep89	protein_coding	7	35397035	35438689	centrosomal protein 89 [Source:MGI Symbol;Acc:MGI:1919390]	-0.678407	4.70224	7.42822	0.0064209	0.0454077
401	ENSMUSG00000023075.9	ENSMUSG00000023075	Akirin1	protein_coding	4	123734559	123750345	akirin 1 [Source:MGI Symbol;Acc:MGI:1915300]	0.648313	5.77264	9.60531	0.00194016	0.0175635
402	ENSMUSG00000023104.9	ENSMUSG00000023104	Rfc2	protein_coding	5	134581366	134601805	replication factor C (activator 1) 2 [Source:MGI Symbol;Acc:MGI:1341868]	-0.789441	7.38507	9.10601	0.00254771	0.0219029
403	ENSMUSG00000023132.8	ENSMUSG00000023132	Gzma	protein_coding	13	113093825	113100981	granzyme A [Source:MGI Symbol;Acc:MGI:109266]	4.80569	3.97932	161.236	6.07599e-37	3.24819e-34
404	ENSMUSG00000023232.17	ENSMUSG00000023232	Serinc2	protein_coding	4	130253495	130279205	serine incorporator 2 [Source:MGI Symbol;Acc:MGI:1919132]	2.84975	0.160618	22.264	2.37621e-06	5.22818e-05
405	ENSMUSG00000023236.7	ENSMUSG00000023236	Scg5	protein_coding	2	113776362	113829121	secretogranin V [Source:MGI Symbol;Acc:MGI:98289]	3.88911	0.538289	44.541	2.49086e-11	1.38009e-09
406	ENSMUSG00000023247.2	ENSMUSG00000023247	Guca2a	protein_coding	4	119637704	119639471	guanylate cyclase activator 2a (guanylin) [Source:MGI Symbol;Acc:MGI:102738]	-2.79691	-0.343972	9.34855	0.00223162	0.019706
407	ENSMUSG00000023267.10	ENSMUSG00000023267	Gabrr2	protein_coding	4	33062999	33095865	gamma-aminobutyric acid (GABA) C receptor, subunit rho 2 [Source:MGI Symbol;Acc:MGI:95626]	2.93558	-1.67537	12.401	0.0004291	0.00493752
408	ENSMUSG00000023272.4	ENSMUSG00000023272	Creld2	protein_coding	15	88819646	88826683	cysteine-rich with EGF-like domains 2 [Source:MGI Symbol;Acc:MGI:1923987]	2.17587	7.46295	22.4331	2.17592e-06	4.89087e-05
409	ENSMUSG00000023274.14	ENSMUSG00000023274	Cd4	protein_coding	6	124864692	124888221	CD4 antigen [Source:MGI Symbol;Acc:MGI:88335]	1.06215	3.03412	10.1899	0.00141212	0.0134352
410	ENSMUSG00000023328.14	ENSMUSG00000023328	Ache	protein_coding	5	137287519	137294466	acetylcholinesterase [Source:MGI Symbol;Acc:MGI:87876]	1.12334	4.73804	8.43593	0.00367879	0.0294601
411	ENSMUSG00000023345.17	ENSMUSG00000023345	Poc1a	protein_coding	9	106281061	106350521	POC1 centriolar protein A [Source:MGI Symbol;Acc:MGI:1917485]	-0.899124	3.81094	7.49707	0.00617996	0.0440186
412	ENSMUSG00000023411.12	ENSMUSG00000023411	Nfatc4	protein_coding	14	55823144	55833943	nuclear factor of activated T cells, cytoplasmic, calcineurin dependent 4 [Source:MGI Symbol;Acc:MGI:1920431]	1.63957	0.281178	11.4445	0.000717075	0.00766761
413	ENSMUSG00000023505.13	ENSMUSG00000023505	Cdca3	protein_coding	6	124829547	124833701	cell division cycle associated 3 [Source:MGI Symbol;Acc:MGI:1315198]	-0.714103	5.72936	8.54941	0.00345634	0.028019
414	ENSMUSG00000023764.18	ENSMUSG00000023764	Sfi1	protein_coding	11	3131850	3193463	Sfi1 homolog, spindle assembly associated (yeast) [Source:MGI Symbol;Acc:MGI:1926137]	1.17485	6.62037	22.9811	1.63599e-06	3.80257e-05
415	ENSMUSG00000023791.16	ENSMUSG00000023791	Pigx	protein_coding	16	32084416	32099740	phosphatidylinositol glycan anchor biosynthesis, class X [Source:MGI Symbol;Acc:MGI:1919334]	-0.831901	5.10581	11.2161	0.000810889	0.00851799
416	ENSMUSG00000023809.10	ENSMUSG00000023809	Rps6ka2	protein_coding	17	7170115	7303315	ribosomal protein S6 kinase, polypeptide 2 [Source:MGI Symbol;Acc:MGI:1342290]	1.42807	3.33843	13.751	0.000208706	0.0026668
417	ENSMUSG00000023828.3	ENSMUSG00000023828	Slc22a3	protein_coding	17	12418960	12507704	solute carrier family 22 (organic cation transporter), member 3 [Source:MGI Symbol;Acc:MGI:1333817]	-1.87058	6.13847	50.0117	1.52833e-12	1.02129e-10
418	ENSMUSG00000023830.14	ENSMUSG00000023830	Igf2r	protein_coding	17	12682406	12769664	insulin-like growth factor 2 receptor [Source:MGI Symbol;Acc:MGI:96435]	0.795462	6.33482	8.21487	0.00415484	0.0323937
419	ENSMUSG00000023886.10	ENSMUSG00000023886	Smoc2	protein_coding	17	14279506	14404790	SPARC related modular calcium binding 2 [Source:MGI Symbol;Acc:MGI:1929881]	4.6524	-1.91321	39.177	3.87079e-10	1.78057e-08
420	ENSMUSG00000023902.18	ENSMUSG00000023902	Zscan10	protein_coding	17	23600856	23611019	zinc finger and SCAN domain containing 10 [Source:MGI Symbol;Acc:MGI:3040700]	1.91148	-0.473513	10.0088	0.00155792	0.014585
421	ENSMUSG00000023908.8	ENSMUSG00000023908	Pkmyt1	protein_coding	17	23726336	23736735	protein kinase, membrane associated tyrosine/threonine 1 [Source:MGI Symbol;Acc:MGI:2137630]	-0.697271	5.92695	11.9562	0.000544663	0.00605929
422	ENSMUSG00000023926.8	ENSMUSG00000023926	Rhag	protein_coding	17	40811126	40840754	Rhesus blood group-associated A glycoprotein [Source:MGI Symbol;Acc:MGI:1202713]	1.68507	3.19256	8.47056	0.0036094	0.0290574
423	ENSMUSG00000023979.14	ENSMUSG00000023979	Guca1b	protein_coding	17	47385393	47392967	guanylate cyclase activator 1B [Source:MGI Symbol;Acc:MGI:1194489]	-6.9405	0.276285	64.9246	7.78175e-16	7.73483e-14
424	ENSMUSG00000023982.8	ENSMUSG00000023982	Guca1a	protein_coding	17	47394558	47400584	guanylate cyclase activator 1a (retina) [Source:MGI Symbol;Acc:MGI:102770]	-2.06108	2.05105	15.1338	0.000100155	0.00142114
425	ENSMUSG00000023999.14	ENSMUSG00000023999	Kif6	protein_coding	17	49615136	49909847	kinesin family member 6 [Source:MGI Symbol;Acc:MGI:1098238]	-1.57878	-0.60104	8.71626	0.00315385	0.0260364
426	ENSMUSG00000024033.9	ENSMUSG00000024033	Rsph1	protein_coding	17	31255019	31277356	radial spoke head 1 homolog (Chlamydomonas) [Source:MGI Symbol;Acc:MGI:1194909]	3.0425	2.40517	57.6861	3.07463e-14	2.48229e-12
427	ENSMUSG00000024034.12	ENSMUSG00000024034	Tmprss3	protein_coding	17	31179272	31198975	transmembrane protease, serine 3 [Source:MGI Symbol;Acc:MGI:2155445]	-2.0454	3.89874	32.2955	1.32419e-08	4.66057e-07
428	ENSMUSG00000024049.15	ENSMUSG00000024049	Myom1	protein_coding	17	71002633	71126856	myomesin 1 [Source:MGI Symbol;Acc:MGI:1341430]	2.0696	4.41923	32.4305	1.23534e-08	4.37903e-07
429	ENSMUSG00000024053.11	ENSMUSG00000024053	Emilin2	protein_coding	17	71252172	71311978	elastin microfibril interfacer 2 [Source:MGI Symbol;Acc:MGI:2389136]	0.79393	5.19615	10.3948	0.00126369	0.0122951
430	ENSMUSG00000024059.10	ENSMUSG00000024059	Clip4	protein_coding	17	71768473	71864273	CAP-GLY domain containing linker protein family, member 4 [Source:MGI Symbol;Acc:MGI:1919100]	2.69557	2.2127	42.1938	8.26618e-11	4.19244e-09
431	ENSMUSG00000024064.14	ENSMUSG00000024064	Galnt14	protein_coding	17	73493228	73710453	polypeptide N-acetylgalactosaminyltransferase 14 [Source:MGI Symbol;Acc:MGI:1918935]	4.33302	0.812294	61.9573	3.50983e-15	3.17007e-13
432	ENSMUSG00000024065.8	ENSMUSG00000024065	Ehd3	protein_coding	17	73804134	73832094	EH-domain containing 3 [Source:MGI Symbol;Acc:MGI:1928900]	1.57099	4.6454	39.3719	3.50304e-10	1.61893e-08
433	ENSMUSG00000024066.9	ENSMUSG00000024066	Xdh	protein_coding	17	73883895	73950196	xanthine dehydrogenase [Source:MGI Symbol;Acc:MGI:98973]	1.83379	5.14996	8.37181	0.00381087	0.0302241
434	ENSMUSG00000024085.13	ENSMUSG00000024085	Man2a1	protein_coding	17	64600736	64755110	mannosidase 2, alpha 1 [Source:MGI Symbol;Acc:MGI:104669]	1.21762	6.40117	19.2108	1.17046e-05	0.000215165
435	ENSMUSG00000024109.18	ENSMUSG00000024109	Nrxn1	protein_coding	17	90033631	91093071	neurexin I [Source:MGI Symbol;Acc:MGI:1096391]	-2.47453	3.81278	45.9932	1.18666e-11	6.86317e-10
436	ENSMUSG00000024112.16	ENSMUSG00000024112	Cacna1h	protein_coding	17	25374285	25433783	calcium channel, voltage-dependent, T type, alpha 1H subunit [Source:MGI Symbol;Acc:MGI:1928842]	4.11766	7.29449	34.0652	5.32954e-09	2.01565e-07
437	ENSMUSG00000024114.15	ENSMUSG00000024114	Prss41	protein_coding	17	23836785	23844172	protease, serine 41 [Source:MGI Symbol;Acc:MGI:1918253]	3.64884	0.919742	46.1752	1.08135e-11	6.30947e-10
438	ENSMUSG00000024130.15	ENSMUSG00000024130	Abca3	protein_coding	17	24351950	24410201	ATP-binding cassette, sub-family A (ABC1), member 3 [Source:MGI Symbol;Acc:MGI:1351617]	1.47431	6.78029	29.1475	6.70732e-08	2.05691e-06
439	ENSMUSG00000024140.9	ENSMUSG00000024140	Epas1	protein_coding	17	86753907	86833410	endothelial PAS domain protein 1 [Source:MGI Symbol;Acc:MGI:109169]	1.63256	3.42237	11.0838	0.000870857	0.00905178
440	ENSMUSG00000024151.13	ENSMUSG00000024151	Msh2	protein_coding	17	87672330	87723713	mutS homolog 2 [Source:MGI Symbol;Acc:MGI:101816]	-0.814626	6.75824	12.1356	0.000494695	0.00556602
441	ENSMUSG00000024155.7	ENSMUSG00000024155	Meiob	protein_coding	17	24804382	24839787	meiosis specific with OB domains [Source:MGI Symbol;Acc:MGI:1922428]	2.20964	-1.25287	14.6587	0.000128838	0.00175616
442	ENSMUSG00000024172.10	ENSMUSG00000024172	St6gal2	protein_coding	17	55445382	55514581	beta galactoside alpha 2,6 sialyltransferase 2 [Source:MGI Symbol;Acc:MGI:2445190]	4.3842	-1.31234	25.0116	5.69851e-07	1.45629e-05
443	ENSMUSG00000024177.8	ENSMUSG00000024177	Nme4	protein_coding	17	26091734	26095508	NME/NM23 nucleoside diphosphate kinase 4 [Source:MGI Symbol;Acc:MGI:1931148]	-0.9692	5.17739	12.6681	0.00037194	0.00436874
444	ENSMUSG00000024190.6	ENSMUSG00000024190	Dusp1	protein_coding	17	26505590	26508519	dual specificity phosphatase 1 [Source:MGI Symbol;Acc:MGI:105120]	1.38031	8.40955	8.84097	0.00294542	0.0246241
445	ENSMUSG00000024210.2	ENSMUSG00000024210	Ip6k3	protein_coding	17	27143969	27167764	inositol hexaphosphate kinase 3 [Source:MGI Symbol;Acc:MGI:3045325]	3.00455	-1.47408	13.412	0.000250017	0.00312403
446	ENSMUSG00000024248.13	ENSMUSG00000024248	Cox7a2l	protein_coding	17	83501919	83514333	cytochrome c oxidase subunit 7A2 like [Source:MGI Symbol;Acc:MGI:106015]	-0.826328	6.7287	7.87549	0.00501092	0.0372897
447	ENSMUSG00000024304.14	ENSMUSG00000024304	Cdh2	protein_coding	18	16588877	16809246	cadherin 2 [Source:MGI Symbol;Acc:MGI:88355]	2.67114	1.99641	14.848	0.000116534	0.00161304
448	ENSMUSG00000024327.15	ENSMUSG00000024327	Slc39a7	protein_coding	17	34028267	34031690	solute carrier family 39 (zinc transporter), member 7 [Source:MGI Symbol;Acc:MGI:95909]	0.921639	3.26636	8.10128	0.00442341	0.0339128
449	ENSMUSG00000024347.16	ENSMUSG00000024347	Psd2	protein_coding	18	35964830	36014715	pleckstrin and Sec7 domain containing 2 [Source:MGI Symbol;Acc:MGI:1921252]	1.54737	2.91026	7.98781	0.00470934	0.0354996
450	ENSMUSG00000024353.4	ENSMUSG00000024353	Mzb1	protein_coding	18	35647266	35649367	marginal zone B and B1 cell-specific protein 1 [Source:MGI Symbol;Acc:MGI:1917066]	2.8433	7.31524	22.1114	2.57276e-06	5.59223e-05
451	ENSMUSG00000024371.14	ENSMUSG00000024371	C2	protein_coding	17	34862604	34898265	complement component 2 (within H-2S) [Source:MGI Symbol;Acc:MGI:88226]	3.38999	2.88211	54.5157	1.54211e-13	1.13817e-11
452	ENSMUSG00000024381.15	ENSMUSG00000024381	Bin1	protein_coding	18	32377217	32435736	bridging integrator 1 [Source:MGI Symbol;Acc:MGI:108092]	-0.858113	5.97423	8.51429	0.00352368	0.0284668
453	ENSMUSG00000024425.3	ENSMUSG00000024425	Ndfip1	protein_coding	18	38418975	38464399	Nedd4 family interacting protein 1 [Source:MGI Symbol;Acc:MGI:1929601]	0.78666	6.28973	14.9151	0.000112458	0.00156428
454	ENSMUSG00000024426.17	ENSMUSG00000024426	Atat1	protein_coding	17	35897595	35910075	alpha tubulin acetyltransferase 1 [Source:MGI Symbol;Acc:MGI:1913869]	1.63415	6.21764	29.7063	5.0271e-08	1.5859e-06
455	ENSMUSG00000024448.14	ENSMUSG00000024448	H2-M10.1	protein_coding	17	36322858	36326155	histocompatibility 2, M region locus 10.1 [Source:MGI Symbol;Acc:MGI:1276522]	3.71967	-1.16452	18.0663	2.13344e-05	0.000366952
456	ENSMUSG00000024451.8	ENSMUSG00000024451	Arap3	protein_coding	18	37972624	37997574	ArfGAP with RhoGAP domain, ankyrin repeat and PH domain 3 [Source:MGI Symbol;Acc:MGI:2147274]	1.69973	5.48064	18.2399	1.94756e-05	0.000338512
457	ENSMUSG00000024480.8	ENSMUSG00000024480	Ap3s1	protein_coding	18	46741876	46790826	adaptor-related protein complex 3, sigma 1 subunit [Source:MGI Symbol;Acc:MGI:1337062]	0.795303	4.46372	7.4356	0.00639459	0.0452702
458	ENSMUSG00000024481.4	ENSMUSG00000024481	Lvrn	protein_coding	18	46850039	46905446	laeverin [Source:MGI Symbol;Acc:MGI:1921824]	3.25115	1.30865	28.5777	9.0014e-08	2.70589e-06
459	ENSMUSG00000024521.7	ENSMUSG00000024521	Pmaip1	protein_coding	18	66458604	66465550	phorbol-12-myristate-13-acetate-induced protein 1 [Source:MGI Symbol;Acc:MGI:1930146]	1.53142	4.48275	10.4274	0.0012416	0.0121158
460	ENSMUSG00000024525.6	ENSMUSG00000024525	Impa2	protein_coding	18	67289253	67319146	inositol (myo)-1(or 4)-monophosphatase 2 [Source:MGI Symbol;Acc:MGI:2149728]	-0.691627	6.07932	10.2774	0.0013467	0.0129675
461	ENSMUSG00000024533.16	ENSMUSG00000024533	Spire1	protein_coding	18	67488209	67610790	spire type actin nucleation factor 1 [Source:MGI Symbol;Acc:MGI:1915416]	0.877543	4.41225	9.15337	0.0024826	0.0214623
462	ENSMUSG00000024544.8	ENSMUSG00000024544	Ldlrad4	protein_coding	18	67933257	68255549	low density lipoprotein receptor class A domain containing 4 [Source:MGI Symbol;Acc:MGI:1277150]	-1.03314	4.0614	9.35205	0.00222737	0.0196772
463	ENSMUSG00000024548.11	ENSMUSG00000024548	Setbp1	protein_coding	18	78750380	79109391	SET binding protein 1 [Source:MGI Symbol;Acc:MGI:1933199]	2.84869	4.2756	50.1634	1.41462e-12	9.48517e-11
464	ENSMUSG00000024597.10	ENSMUSG00000024597	Slc12a2	protein_coding	18	57878678	57946821	solute carrier family 12, member 2 [Source:MGI Symbol;Acc:MGI:101924]	1.47599	6.51714	19.2053	1.17384e-05	0.00021547
465	ENSMUSG00000024598.8	ENSMUSG00000024598	Fbn2	protein_coding	18	58008623	58209926	fibrillin 2 [Source:MGI Symbol;Acc:MGI:95490]	4.91864	-2.19289	13.2051	0.000279182	0.00341933
466	ENSMUSG00000024620.11	ENSMUSG00000024620	Pdgfrb	protein_coding	18	61045150	61085061	platelet derived growth factor receptor, beta polypeptide [Source:MGI Symbol;Acc:MGI:97531]	-1.445	5.17013	28.7006	8.44773e-08	2.55655e-06
467	ENSMUSG00000024621.15	ENSMUSG00000024621	Csf1r	protein_coding	18	61105572	61132149	colony stimulating factor 1 receptor [Source:MGI Symbol;Acc:MGI:1339758]	1.57529	5.40433	10.4643	0.00121704	0.0119174
468	ENSMUSG00000024672.11	ENSMUSG00000024672	Ms4a7	protein_coding	19	11321039	11336146	membrane-spanning 4-domains, subfamily A, member 7 [Source:MGI Symbol;Acc:MGI:1918846]	1.71255	-1.94778	7.33643	0.0067571	0.047239
469	ENSMUSG00000024679.10	ENSMUSG00000024679	Ms4a6d	protein_coding	19	11586604	11604849	membrane-spanning 4-domains, subfamily A, member 6D [Source:MGI Symbol;Acc:MGI:1916024]	1.79253	-0.187904	10.0783	0.00150026	0.0140975
470	ENSMUSG00000024726.9	ENSMUSG00000024726	Carnmt1	protein_coding	19	18670780	18704788	carnosine N-methyltransferase 1 [Source:MGI Symbol;Acc:MGI:1914633]	-1.87096	2.14885	25.4779	4.47472e-07	1.16003e-05
471	ENSMUSG00000024749.8	ENSMUSG00000024749	Tmc1	protein_coding	19	20783458	20954202	transmembrane channel-like gene family 1 [Source:MGI Symbol;Acc:MGI:2151016]	-3.41926	-2.53974	8.07203	0.00449537	0.0342785
472	ENSMUSG00000024791.10	ENSMUSG00000024791	Cdca5	protein_coding	19	6084983	6091777	cell division cycle associated 5 [Source:MGI Symbol;Acc:MGI:1915099]	-0.788804	5.37326	10.2827	0.00134282	0.0129502
473	ENSMUSG00000024805.16	ENSMUSG00000024805	Pcgf5	protein_coding	19	36348309	36460970	polycomb group ring finger 5 [Source:MGI Symbol;Acc:MGI:1923505]	-0.675583	6.5548	8.94892	0.00277634	0.0235186
474	ENSMUSG00000024807.17	ENSMUSG00000024807	Syvn1	protein_coding	19	6046576	6053712	synovial apoptosis inhibitor 1, synoviolin [Source:MGI Symbol;Acc:MGI:1921376]	1.93698	7.77462	34.1121	5.2028e-09	1.97907e-07
475	ENSMUSG00000024844.14	ENSMUSG00000024844	Banf1	protein_coding	19	5364641	5366645	barrier to autointegration factor 1 [Source:MGI Symbol;Acc:MGI:1346330]	-0.783485	6.62407	8.77474	0.00305431	0.0253735
476	ENSMUSG00000024851.13	ENSMUSG00000024851	Pitpnm1	protein_coding	19	4099998	4113965	phosphatidylinositol transfer protein, membrane-associated 1 [Source:MGI Symbol;Acc:MGI:1197524]	0.842814	6.78593	9.14009	0.00250068	0.0216092
477	ENSMUSG00000024897.8	ENSMUSG00000024897	Apba1	protein_coding	19	23758876	23949597	amyloid beta (A4) precursor protein binding, family A, member 1 [Source:MGI Symbol;Acc:MGI:1860297]	1.75825	3.51549	15.5658	7.96818e-05	0.0011649
478	ENSMUSG00000024901.14	ENSMUSG00000024901	Peli3	protein_coding	19	4930651	4943127	pellino 3 [Source:MGI Symbol;Acc:MGI:1924963]	2.79222	0.0577386	27.4896	1.57943e-07	4.54748e-06
479	ENSMUSG00000024909.14	ENSMUSG00000024909	Efemp2	protein_coding	19	5473973	5481853	epidermal growth factor-containing fibulin-like extracellular matrix protein 2 [Source:MGI Symbol;Acc:MGI:1891209]	1.31159	0.548396	8.70933	0.00316585	0.0261246
480	ENSMUSG00000024910.4	ENSMUSG00000024910	Ctsw	protein_coding	19	5465240	5468498	cathepsin W [Source:MGI Symbol;Acc:MGI:1338045]	1.66075	5.5038	22.2028	2.45315e-06	5.36168e-05
481	ENSMUSG00000024924.14	ENSMUSG00000024924	Vldlr	protein_coding	19	27216484	27254231	very low density lipoprotein receptor [Source:MGI Symbol;Acc:MGI:98935]	-2.66663	5.6181	34.2308	4.89473e-09	1.87268e-07
482	ENSMUSG00000024987.5	ENSMUSG00000024987	Cyp26a1	protein_coding	19	37697808	37701528	cytochrome P450, family 26, subfamily a, polypeptide 1 [Source:MGI Symbol;Acc:MGI:1096359]	-2.63378	-0.0352201	10.1702	0.00142728	0.0135599
483	ENSMUSG00000025014.12	ENSMUSG00000025014	Dntt	protein_coding	19	41029275	41059523	deoxynucleotidyltransferase, terminal [Source:MGI Symbol;Acc:MGI:98659]	-1.76127	9.33983	11.5515	0.00067696	0.0073131
484	ENSMUSG00000025020.11	ENSMUSG00000025020	Slit1	protein_coding	19	41600257	41743665	slit guidance ligand 1 [Source:MGI Symbol;Acc:MGI:1315203]	-1.72684	0.790578	11.4584	0.0007117	0.00762591
485	ENSMUSG00000025036.6	ENSMUSG00000025036	Sfxn2	protein_coding	19	46573365	46596898	sideroflexin 2 [Source:MGI Symbol;Acc:MGI:2137678]	-0.855479	4.32914	11.3892	0.00073874	0.00786875
486	ENSMUSG00000025044.16	ENSMUSG00000025044	Msr1	protein_coding	8	39581685	39642673	macrophage scavenger receptor 1 [Source:MGI Symbol;Acc:MGI:98257]	3.35331	-0.399748	16.5293	4.7904e-05	0.000744922
487	ENSMUSG00000025064.14	ENSMUSG00000025064	Col17a1	protein_coding	19	47646344	47692094	collagen, type XVII, alpha 1 [Source:MGI Symbol;Acc:MGI:88450]	4.36955	1.85754	42.6974	6.38974e-11	3.29997e-09
488	ENSMUSG00000025083.18	ENSMUSG00000025083	Afap1l2	protein_coding	19	56912361	57008228	actin filament associated protein 1-like 2 [Source:MGI Symbol;Acc:MGI:2147658]	4.11805	-1.88713	13.9139	0.000191383	0.00247583
489	ENSMUSG00000025086.12	ENSMUSG00000025086	Trub1	protein_coding	19	57452906	57491005	TruB pseudouridine (psi) synthase family member 1 [Source:MGI Symbol;Acc:MGI:1919383]	-0.668515	5.31003	10.2813	0.00134389	0.0129542
490	ENSMUSG00000025092.6	ENSMUSG00000025092	Hspa12a	protein_coding	19	58795751	58860984	heat shock protein 12A [Source:MGI Symbol;Acc:MGI:1920692]	1.99101	-0.361197	15.585	7.8877e-05	0.00115655
491	ENSMUSG00000025137.15	ENSMUSG00000025137	Pcyt2	protein_coding	11	120610087	120617936	phosphate cytidylyltransferase 2, ethanolamine [Source:MGI Symbol;Acc:MGI:1915921]	-0.658172	6.06927	7.46018	0.00630788	0.0447524
492	ENSMUSG00000025140.15	ENSMUSG00000025140	Pycr1	protein_coding	11	120635712	120643769	pyrroline-5-carboxylate reductase 1 [Source:MGI Symbol;Acc:MGI:2384795]	2.45824	4.48847	39.4767	3.31999e-10	1.55247e-08
493	ENSMUSG00000025163.6	ENSMUSG00000025163	Cd7	protein_coding	11	121036747	121039418	CD7 antigen [Source:MGI Symbol;Acc:MGI:88344]	2.30075	5.02129	21.3687	3.78902e-06	7.82327e-05
494	ENSMUSG00000025188.15	ENSMUSG00000025188	Hps1	protein_coding	19	42755105	42779978	HPS1, biogenesis of lysosomal organelles complex 3 subunit 1 [Source:MGI Symbol;Acc:MGI:2177763]	-0.563308	6.17267	7.32092	0.00681564	0.0475279
495	ENSMUSG00000025203.5	ENSMUSG00000025203	Scd2	protein_coding	19	44293676	44306864	stearoyl-Coenzyme A desaturase 2 [Source:MGI Symbol;Acc:MGI:98240]	-1.11945	8.15996	12.0631	0.000514285	0.00575697
496	ENSMUSG00000025217.15	ENSMUSG00000025217	Btrc	protein_coding	19	45363734	45530013	beta-transducin repeat containing protein [Source:MGI Symbol;Acc:MGI:1338871]	-0.776916	4.99845	12.3265	0.000446562	0.00510283
497	ENSMUSG00000025218.6	ENSMUSG00000025218	Poll	protein_coding	19	45552275	45560531	polymerase (DNA directed), lambda [Source:MGI Symbol;Acc:MGI:1889000]	-0.741172	4.79217	7.58289	0.00589248	0.0424447
498	ENSMUSG00000025227.14	ENSMUSG00000025227	Mfsd13a	protein_coding	19	46341121	46375252	major facilitator superfamily domain containing 13a [Source:MGI Symbol;Acc:MGI:1922396]	-1.88226	5.01975	45.3536	1.64489e-11	9.32262e-10
499	ENSMUSG00000025289.15	ENSMUSG00000025289	Prdx4	protein_coding	X	155323918	155340754	peroxiredoxin 4 [Source:MGI Symbol;Acc:MGI:1859815]	1.33041	6.67585	19.8932	8.18929e-06	0.000156054
500	ENSMUSG00000025329.3	ENSMUSG00000025329	Padi1	protein_coding	4	140812983	140845778	peptidyl arginine deiminase, type I [Source:MGI Symbol;Acc:MGI:1338893]	-2.19646	-0.987146	13.0524	0.000302904	0.00366449
501	ENSMUSG00000025348.9	ENSMUSG00000025348	Itga7	protein_coding	10	128933818	128958282	integrin alpha 7 [Source:MGI Symbol;Acc:MGI:102700]	1.77861	-2.05746	8.0802	0.00447515	0.0342095
502	ENSMUSG00000025352.6	ENSMUSG00000025352	Gdf11	protein_coding	10	128882295	128891718	growth differentiation factor 11 [Source:MGI Symbol;Acc:MGI:1338027]	1.31039	2.19491	11.4657	0.000708913	0.00760428
503	ENSMUSG00000025355.7	ENSMUSG00000025355	Mmp19	protein_coding	10	128790910	128800824	matrix metallopeptidase 19 [Source:MGI Symbol;Acc:MGI:1927899]	2.3961	-0.205149	15.0654	0.000103848	0.00146722
504	ENSMUSG00000025357.8	ENSMUSG00000025357	Dgka	protein_coding	10	128720134	128744855	diacylglycerol kinase, alpha [Source:MGI Symbol;Acc:MGI:102952]	1.02308	5.98386	11.9436	0.00054834	0.00608993
505	ENSMUSG00000025375.15	ENSMUSG00000025375	Aatk	protein_coding	11	120007313	120047167	apoptosis-associated tyrosine kinase [Source:MGI Symbol;Acc:MGI:1197518]	1.47219	3.69063	14.845	0.000116717	0.00161445
506	ENSMUSG00000025427.14	ENSMUSG00000025427	Rnf165	protein_coding	18	77456110	77565147	ring finger protein 165 [Source:MGI Symbol;Acc:MGI:2444521]	4.22804	-1.67698	33.1668	8.45825e-09	3.08111e-07
507	ENSMUSG00000025461.11	ENSMUSG00000025461	Cd163l1	protein_coding	7	140218267	140231145	CD163 molecule-like 1 [Source:MGI Symbol;Acc:MGI:2443796]	-2.05904	1.14035	11.1648	0.000833625	0.00871676
508	ENSMUSG00000025486.17	ENSMUSG00000025486	Sirt3	protein_coding	7	140863666	140882309	sirtuin 3 [Source:MGI Symbol;Acc:MGI:1927665]	-0.850097	6.02229	14.6921	0.000126577	0.00173266
509	ENSMUSG00000025497.15	ENSMUSG00000025497	Cdhr5	protein_coding	7	141269083	141276786	cadherin-related family member 5 [Source:MGI Symbol;Acc:MGI:1919290]	-2.47466	-2.02498	7.57381	0.00592225	0.0426282
510	ENSMUSG00000025504.14	ENSMUSG00000025504	Eps8l2	protein_coding	7	141338880	141363020	EPS8-like 2 [Source:MGI Symbol;Acc:MGI:2138828]	1.03959	2.00502	8.34053	0.00387704	0.0306383
511	ENSMUSG00000025511.14	ENSMUSG00000025511	Tspan4	protein_coding	7	141475240	141493427	tetraspanin 4 [Source:MGI Symbol;Acc:MGI:1928097]	-0.844357	5.81184	10.2114	0.00139576	0.0133179
512	ENSMUSG00000025512.15	ENSMUSG00000025512	Chid1	protein_coding	7	141493136	141539857	chitinase domain containing 1 [Source:MGI Symbol;Acc:MGI:1915288]	0.945673	5.52511	13.8867	0.000194163	0.00250688
513	ENSMUSG00000025555.14	ENSMUSG00000025555	Farp1	protein_coding	14	121035200	121283744	FERM, RhoGEF (Arhgef) and pleckstrin domain protein 1 (chondrocyte-derived) [Source:MGI Symbol;Acc:MGI:2446173]	1.94004	2.76626	21.7754	3.06507e-06	6.54014e-05
514	ENSMUSG00000025592.17	ENSMUSG00000025592	Dach2	protein_coding	X	113297510	113836386	dachshund family transcription factor 2 [Source:MGI Symbol;Acc:MGI:1890446]	-2.07999	0.345549	21.4165	3.69583e-06	7.66285e-05
515	ENSMUSG00000025658.16	ENSMUSG00000025658	Cnksr2	protein_coding	X	157821436	158043294	connector enhancer of kinase suppressor of Ras 2 [Source:MGI Symbol;Acc:MGI:2661175]	-5.58388	-2.42343	12.9108	0.000326684	0.00391862
516	ENSMUSG00000025702.15	ENSMUSG00000025702	43532	protein_coding	6	116338024	116409540	membrane-associated ring finger (C3HC4) 8 [Source:MGI Symbol;Acc:MGI:1919029]	0.659725	5.20811	7.72278	0.00545285	0.0398756
517	ENSMUSG00000025743.14	ENSMUSG00000025743	Sdc3	protein_coding	4	130792537	130826319	syndecan 3 [Source:MGI Symbol;Acc:MGI:1349163]	1.60332	5.16478	31.3885	2.11228e-08	7.10074e-07
518	ENSMUSG00000025747.12	ENSMUSG00000025747	Tyms	protein_coding	5	30058202	30073617	thymidylate synthase [Source:MGI Symbol;Acc:MGI:98878]	-0.663986	5.76574	7.66732	0.005623	0.0408352
519	ENSMUSG00000025790.14	ENSMUSG00000025790	Slco3a1	protein_coding	7	74275419	74554780	solute carrier organic anion transporter family, member 3a1 [Source:MGI Symbol;Acc:MGI:1351867]	-1.31577	5.8667	29.1524	6.69018e-08	2.05484e-06
520	ENSMUSG00000025810.9	ENSMUSG00000025810	Nrp1	protein_coding	8	128358604	128503363	neuropilin 1 [Source:MGI Symbol;Acc:MGI:106206]	1.53111	2.98262	14.363	0.000150738	0.00200511
521	ENSMUSG00000025823.9	ENSMUSG00000025823	Pdia4	protein_coding	6	47796141	47813430	protein disulfide isomerase associated 4 [Source:MGI Symbol;Acc:MGI:104864]	1.95194	8.11188	26.8654	2.18133e-07	6.09416e-06
522	ENSMUSG00000025876.15	ENSMUSG00000025876	Unc5a	protein_coding	13	54949411	55006018	unc-5 netrin receptor A [Source:MGI Symbol;Acc:MGI:894682]	-5.48859	3.22717	146.518	1.00026e-33	4.49664e-31
523	ENSMUSG00000025932.14	ENSMUSG00000025932	Eya1	protein_coding	1	14168954	14310235	EYA transcriptional coactivator and phosphatase 1 [Source:MGI Symbol;Acc:MGI:109344]	-0.71598	4.874	8.33069	0.00389808	0.0307555
524	ENSMUSG00000025936.15	ENSMUSG00000025936	Gm4956	transcribed_unprocessed_pseudogene	1	21285246	21298312	predicted gene 4956 [Source:MGI Symbol;Acc:MGI:3647976]	-8.12813	0.904031	45.1281	1.84558e-11	1.03123e-09
525	ENSMUSG00000025940.6	ENSMUSG00000025940	Tmem70	protein_coding	1	16665207	16678275	transmembrane protein 70 [Source:MGI Symbol;Acc:MGI:1915068]	-0.636644	5.14334	7.9013	0.00493992	0.0368584
526	ENSMUSG00000025949.16	ENSMUSG00000025949	Pikfyve	protein_coding	1	65186683	65278695	phosphoinositide kinase, FYVE type zinc finger containing [Source:MGI Symbol;Acc:MGI:1335106]	0.763682	5.98407	7.76866	0.00531603	0.0391552
527	ENSMUSG00000025964.15	ENSMUSG00000025964	Adam23	protein_coding	1	63445891	63596276	a disintegrin and metallopeptidase domain 23 [Source:MGI Symbol;Acc:MGI:1345162]	3.56704	-0.0425361	31.525	1.96884e-08	6.66844e-07
528	ENSMUSG00000025969.15	ENSMUSG00000025969	Nrp2	protein_coding	1	62703285	62818695	neuropilin 2 [Source:MGI Symbol;Acc:MGI:1100492]	2.82863	3.93979	43.8845	3.48345e-11	1.87236e-09
529	ENSMUSG00000025993.10	ENSMUSG00000025993	Slc40a1	protein_coding	1	45908068	45926523	solute carrier family 40 (iron-regulated transporter), member 1 [Source:MGI Symbol;Acc:MGI:1315204]	1.68273	3.72894	7.99036	0.00470271	0.035463
530	ENSMUSG00000026000.16	ENSMUSG00000026000	Lancl1	protein_coding	1	67000517	67038872	LanC (bacterial lantibiotic synthetase component C)-like 1 [Source:MGI Symbol;Acc:MGI:1336997]	-0.839525	5.62591	15.9124	6.63419e-05	0.000988163
531	ENSMUSG00000026003.5	ENSMUSG00000026003	Acadl	protein_coding	1	66830839	66863277	acyl-Coenzyme A dehydrogenase, long-chain [Source:MGI Symbol;Acc:MGI:87866]	-0.989026	6.16729	21.6513	3.26983e-06	6.89522e-05
532	ENSMUSG00000026012.2	ENSMUSG00000026012	Cd28	protein_coding	1	60716800	60773359	CD28 antigen [Source:MGI Symbol;Acc:MGI:88327]	1.40779	4.8702	15.8783	6.75495e-05	0.00100461
533	ENSMUSG00000026014.15	ENSMUSG00000026014	Raph1	protein_coding	1	60482292	60567104	Ras association (RalGDS/AF-6) and pleckstrin homology domains 1 [Source:MGI Symbol;Acc:MGI:1924550]	1.30285	3.89127	17.3608	3.09143e-05	0.00050421
534	ENSMUSG00000026024.14	ENSMUSG00000026024	Als2	protein_coding	1	59162926	59237231	alsin Rho guanine nucleotide exchange factor [Source:MGI Symbol;Acc:MGI:1921268]	-0.866717	5.16933	12.5328	0.000399873	0.00464444
535	ENSMUSG00000026070.15	ENSMUSG00000026070	Il18r1	protein_coding	1	40465552	40500854	interleukin 18 receptor 1 [Source:MGI Symbol;Acc:MGI:105383]	0.913194	5.28874	10.2835	0.00134223	0.0129502
536	ENSMUSG00000026072.12	ENSMUSG00000026072	Il1r1	protein_coding	1	40225080	40317257	interleukin 1 receptor, type I [Source:MGI Symbol;Acc:MGI:96545]	-1.54801	5.7305	28.1286	1.13517e-07	3.34131e-06
537	ENSMUSG00000026090.16	ENSMUSG00000026090	2010300C02Rik	protein_coding	1	37611677	37720085	RIKEN cDNA 2010300C02 gene [Source:MGI Symbol;Acc:MGI:1919347]	1.51482	2.76314	10.7009	0.00107085	0.0107389
538	ENSMUSG00000026113.17	ENSMUSG00000026113	Inpp4a	protein_coding	1	37299865	37410736	inositol polyphosphate-4-phosphatase, type I [Source:MGI Symbol;Acc:MGI:1931123]	0.88017	5.66291	9.90841	0.00164526	0.0152783
539	ENSMUSG00000026153.15	ENSMUSG00000026153	Fam135a	protein_coding	1	24011093	24100341	family with sequence similarity 135, member A [Source:MGI Symbol;Acc:MGI:1915437]	1.4837	3.90481	16.7049	4.36691e-05	0.000687671
540	ENSMUSG00000026167.14	ENSMUSG00000026167	Wnt10a	protein_coding	1	74791516	74804179	wingless-type MMTV integration site family, member 10A [Source:MGI Symbol;Acc:MGI:108071]	3.64069	4.79964	24.0255	9.50681e-07	2.31297e-05
541	ENSMUSG00000026175.12	ENSMUSG00000026175	Vil1	protein_coding	1	74409376	74435559	villin 1 [Source:MGI Symbol;Acc:MGI:98930]	-2.18543	-0.647374	9.63187	0.00191229	0.017343
542	ENSMUSG00000026193.15	ENSMUSG00000026193	Fn1	protein_coding	1	71585520	71653200	fibronectin 1 [Source:MGI Symbol;Acc:MGI:95566]	2.13682	5.10105	13.7597	0.000207743	0.00265793
543	ENSMUSG00000026207.16	ENSMUSG00000026207	Speg	protein_coding	1	75375297	75432320	SPEG complex locus [Source:MGI Symbol;Acc:MGI:109282]	-1.23365	1.29308	10.2646	0.00135606	0.0130272
544	ENSMUSG00000026223.15	ENSMUSG00000026223	Itm2c	protein_coding	1	85894281	85908675	integral membrane protein 2C [Source:MGI Symbol;Acc:MGI:1927594]	1.07825	6.88774	16.7308	4.30765e-05	0.000679468
545	ENSMUSG00000026271.15	ENSMUSG00000026271	Gpr35	protein_coding	1	92950865	92986391	G protein-coupled receptor 35 [Source:MGI Symbol;Acc:MGI:1929509]	1.57721	1.1437	7.41869	0.00645497	0.0455672
546	ENSMUSG00000026303.6	ENSMUSG00000026303	Mlph	protein_coding	1	90915085	90951142	melanophilin [Source:MGI Symbol;Acc:MGI:2176380]	-2.76529	1.4905	34.0028	5.50338e-09	2.07346e-07
547	ENSMUSG00000026308.8	ENSMUSG00000026308	Klhl30	protein_coding	1	91351016	91362416	kelch-like 30 [Source:MGI Symbol;Acc:MGI:1918038]	-1.31161	2.52163	11.1623	0.000834756	0.00872238
548	ENSMUSG00000026357.3	ENSMUSG00000026357	Rgs18	protein_coding	1	144752683	144775435	regulator of G-protein signaling 18 [Source:MGI Symbol;Acc:MGI:1927498]	-0.65096	6.33087	8.05458	0.00453886	0.0344905
549	ENSMUSG00000026365.15	ENSMUSG00000026365	Cfh	protein_coding	1	140084708	140183764	complement component factor h [Source:MGI Symbol;Acc:MGI:88385]	1.96278	0.399732	8.35959	0.00383657	0.0304036
550	ENSMUSG00000026368.6	ENSMUSG00000026368	F13b	protein_coding	1	139501702	139523752	coagulation factor XIII, beta subunit [Source:MGI Symbol;Acc:MGI:88379]	4.04182	-1.44626	15.2611	9.36272e-05	0.00133908
551	ENSMUSG00000026385.16	ENSMUSG00000026385	Dbi	protein_coding	1	120113280	120121078	diazepam binding inhibitor [Source:MGI Symbol;Acc:MGI:94865]	-1.02731	5.06701	13.6311	0.000222467	0.00282258
552	ENSMUSG00000026393.10	ENSMUSG00000026393	Nek7	protein_coding	1	138482875	138620141	NIMA (never in mitosis gene a)-related expressed kinase 7 [Source:MGI Symbol;Acc:MGI:1890645]	0.733593	6.51316	8.24476	0.00408699	0.0319654
553	ENSMUSG00000026398.14	ENSMUSG00000026398	Nr5a2	protein_coding	1	136842571	136960448	nuclear receptor subfamily 5, group A, member 2 [Source:MGI Symbol;Acc:MGI:1346834]	4.7612	-1.54499	10.8956	0.000963908	0.00985305
554	ENSMUSG00000026415.11	ENSMUSG00000026415	Fcamr	protein_coding	1	130800902	130814740	Fc receptor, IgA, IgM, high affinity [Source:MGI Symbol;Acc:MGI:1927803]	2.83912	-0.640234	12.2782	0.000458273	0.00520957
555	ENSMUSG00000026418.16	ENSMUSG00000026418	Tnni1	protein_coding	1	135779434	135810989	troponin I, skeletal, slow 1 [Source:MGI Symbol;Acc:MGI:105073]	-1.49896	1.21162	7.70932	0.00549366	0.0401393
556	ENSMUSG00000026421.14	ENSMUSG00000026421	Csrp1	protein_coding	1	135720061	135752232	cysteine and glycine-rich protein 1 [Source:MGI Symbol;Acc:MGI:88549]	-0.87134	7.30172	11.6305	0.000648787	0.00706663
557	ENSMUSG00000026450.14	ENSMUSG00000026450	Chit1	protein_coding	1	134111242	134151540	chitinase 1 (chitotriosidase) [Source:MGI Symbol;Acc:MGI:1919134]	2.55383	0.304594	12.7953	0.000347486	0.00413057
558	ENSMUSG00000026456.18	ENSMUSG00000026456	Cyb5r1	protein_coding	1	134405559	134411740	cytochrome b5 reductase 1 [Source:MGI Symbol;Acc:MGI:1919267]	-0.656499	5.17471	8.76285	0.00307428	0.0255179
559	ENSMUSG00000026458.13	ENSMUSG00000026458	Ppfia4	protein_coding	1	134296783	134332928	protein tyrosine phosphatase, receptor type, f polypeptide (PTPRF), interacting protein (liprin), alpha 4 [Source:MGI Symbol;Acc:MGI:1915757]	-1.9655	3.40219	24.5545	7.22371e-07	1.81096e-05
560	ENSMUSG00000026459.5	ENSMUSG00000026459	Myog	protein_coding	1	134289989	134292548	myogenin [Source:MGI Symbol;Acc:MGI:97276]	-1.93825	-0.157587	11.2234	0.000807739	0.00848941
561	ENSMUSG00000026478.14	ENSMUSG00000026478	Lamc1	protein_coding	1	153218922	153332786	laminin, gamma 1 [Source:MGI Symbol;Acc:MGI:99914]	0.948439	5.47206	11.0192	0.000901723	0.00931875
562	ENSMUSG00000026483.13	ENSMUSG00000026483	Fam129a	protein_coding	1	151571186	151721939	family with sequence similarity 129, member A [Source:MGI Symbol;Acc:MGI:2137237]	0.730499	5.8051	7.50492	0.00615308	0.0438745
563	ENSMUSG00000026504.17	ENSMUSG00000026504	Sdccag8	protein_coding	1	176814660	177020437	serologically defined colon cancer antigen 8 [Source:MGI Symbol;Acc:MGI:1924066]	-0.710359	4.57337	8.14998	0.00430616	0.0333108
564	ENSMUSG00000026532.7	ENSMUSG00000026532	Spta1	protein_coding	1	174172776	174248450	spectrin alpha, erythrocytic 1 [Source:MGI Symbol;Acc:MGI:98385]	1.91546	3.95382	9.20972	0.00240733	0.0209674
565	ENSMUSG00000026535.9	ENSMUSG00000026535	Ifi202b	protein_coding	1	173962568	173982744	interferon activated gene 202B [Source:MGI Symbol;Acc:MGI:1347083]	10.7536	3.78699	295.482	3.17799e-66	3.92879e-63
566	ENSMUSG00000026536.9	ENSMUSG00000026536	Ifi211	protein_coding	1	173896345	173913046	interferon activated gene 211 [Source:MGI Symbol;Acc:MGI:3041120]	3.06864	2.9425	26.6238	2.47178e-07	6.81893e-06
567	ENSMUSG00000026548.4	ENSMUSG00000026548	Slamf9	protein_coding	1	172475358	172478575	SLAM family member 9 [Source:MGI Symbol;Acc:MGI:1923692]	4.08743	3.77288	28.7103	8.40567e-08	2.55006e-06
568	ENSMUSG00000026573.7	ENSMUSG00000026573	Xcl1	protein_coding	1	164931644	164935527	chemokine (C motif) ligand 1 [Source:MGI Symbol;Acc:MGI:104593]	3.04648	3.49172	29.3431	6.06335e-08	1.87983e-06
569	ENSMUSG00000026576.12	ENSMUSG00000026576	Atp1b1	protein_coding	1	164437109	164458355	ATPase, Na+/K+ transporting, beta 1 polypeptide [Source:MGI Symbol;Acc:MGI:88108]	1.28437	4.75374	16.8755	3.99143e-05	0.000634141
570	ENSMUSG00000026579.8	ENSMUSG00000026579	F5	protein_coding	1	164151838	164220277	coagulation factor V [Source:MGI Symbol;Acc:MGI:88382]	1.90751	3.92738	13.9116	0.000191614	0.0024772
571	ENSMUSG00000026580.16	ENSMUSG00000026580	Selp	protein_coding	1	164115264	164150026	selectin, platelet [Source:MGI Symbol;Acc:MGI:98280]	-1.32938	4.40299	9.11979	0.0025286	0.0217768
572	ENSMUSG00000026582.6	ENSMUSG00000026582	Sele	protein_coding	1	164048234	164057677	selectin, endothelial cell [Source:MGI Symbol;Acc:MGI:98278]	1.69683	-0.455583	8.39006	0.00377278	0.0300425
573	ENSMUSG00000026586.16	ENSMUSG00000026586	Prrx1	protein_coding	1	163245119	163313710	paired related homeobox 1 [Source:MGI Symbol;Acc:MGI:97712]	3.20614	-2.3178	8.81708	0.00298424	0.0248959
574	ENSMUSG00000026600.12	ENSMUSG00000026600	Soat1	protein_coding	1	156424525	156474331	sterol O-acyltransferase 1 [Source:MGI Symbol;Acc:MGI:104665]	0.703029	5.36198	8.7193	0.00314858	0.0260038
575	ENSMUSG00000026602.9	ENSMUSG00000026602	Nphs2	protein_coding	1	156310727	156328035	nephrosis 2, podocin [Source:MGI Symbol;Acc:MGI:2157018]	2.65068	-1.58747	13.0841	0.000297811	0.00361836
576	ENSMUSG00000026620.11	ENSMUSG00000026620	Mark1	protein_coding	1	184896789	184999570	MAP/microtubule affinity regulating kinase 1 [Source:MGI Symbol;Acc:MGI:2664902]	2.75653	-0.916989	15.6927	7.45093e-05	0.00109657
577	ENSMUSG00000026627.7	ENSMUSG00000026627	Tmem206	protein_coding	1	191325912	191350914	transmembrane protein 206 [Source:MGI Symbol;Acc:MGI:1914200]	-0.867258	5.13036	13.3385	0.000260016	0.00322186
578	ENSMUSG00000026643.16	ENSMUSG00000026643	Nmt2	protein_coding	2	3284212	3328877	N-myristoyltransferase 2 [Source:MGI Symbol;Acc:MGI:1202298]	-0.593636	5.45523	8.53815	0.00347778	0.0281467
579	ENSMUSG00000026649.14	ENSMUSG00000026649	Cfap126	protein_coding	1	171113918	171126967	cilia and flagella associated protein 126 [Source:MGI Symbol;Acc:MGI:1922722]	-1.39511	0.596079	8.23039	0.00411948	0.0321782
580	ENSMUSG00000026663.6	ENSMUSG00000026663	Atf6	protein_coding	1	170704674	170867771	activating transcription factor 6 [Source:MGI Symbol;Acc:MGI:1926157]	0.957051	6.80629	14.5929	0.000133414	0.00181245
581	ENSMUSG00000026675.12	ENSMUSG00000026675	Hsd17b7	protein_coding	1	169949535	169969241	hydroxysteroid (17-beta) dehydrogenase 7 [Source:MGI Symbol;Acc:MGI:1330808]	0.874758	3.60427	8.72773	0.00313406	0.0259163
582	ENSMUSG00000026712.3	ENSMUSG00000026712	Mrc1	protein_coding	2	14229392	14332057	mannose receptor, C type 1 [Source:MGI Symbol;Acc:MGI:97142]	3.34892	2.47594	40.3846	2.08575e-10	9.98938e-09
583	ENSMUSG00000026764.15	ENSMUSG00000026764	Kif5c	protein_coding	2	49619298	49774778	kinesin family member 5C [Source:MGI Symbol;Acc:MGI:1098269]	2.57074	0.630493	31.9547	1.57814e-08	5.44775e-07
584	ENSMUSG00000026765.12	ENSMUSG00000026765	Lypd6b	protein_coding	2	49787688	49948849	LY6/PLAUR domain containing 6B [Source:MGI Symbol;Acc:MGI:1919147]	-1.39057	0.860711	10.5836	0.00114096	0.0112954
585	ENSMUSG00000026768.10	ENSMUSG00000026768	Itga8	protein_coding	2	12106632	12301922	integrin alpha 8 [Source:MGI Symbol;Acc:MGI:109442]	1.68338	-1.03011	9.13026	0.00251416	0.0216878
586	ENSMUSG00000026771.14	ENSMUSG00000026771	Spopl	protein_coding	2	23506220	23572106	speckle-type POZ protein-like [Source:MGI Symbol;Acc:MGI:1924107]	0.615801	5.03483	7.56937	0.00593685	0.0427171
587	ENSMUSG00000026833.18	ENSMUSG00000026833	Olfm1	protein_coding	2	28192992	28230736	olfactomedin 1 [Source:MGI Symbol;Acc:MGI:1860437]	1.82169	2.78647	17.4486	2.95182e-05	0.000485345
588	ENSMUSG00000026837.15	ENSMUSG00000026837	Col5a1	protein_coding	2	27886425	28039514	collagen, type V, alpha 1 [Source:MGI Symbol;Acc:MGI:88457]	2.14315	2.3894	18.3286	1.85897e-05	0.000324828
589	ENSMUSG00000026839.17	ENSMUSG00000026839	Upp2	protein_coding	2	58567298	58792971	uridine phosphorylase 2 [Source:MGI Symbol;Acc:MGI:1923904]	-2.15977	-1.12735	12.6934	0.000366946	0.00432035
590	ENSMUSG00000026853.15	ENSMUSG00000026853	Crat	protein_coding	2	30400471	30415813	carnitine acetyltransferase [Source:MGI Symbol;Acc:MGI:109501]	0.796064	4.91026	11.8174	0.000586803	0.0064519
591	ENSMUSG00000026875.14	ENSMUSG00000026875	Traf1	protein_coding	2	34941750	34961772	TNF receptor-associated factor 1 [Source:MGI Symbol;Acc:MGI:101836]	1.35374	5.00841	10.4153	0.00124976	0.0121834
592	ENSMUSG00000026880.11	ENSMUSG00000026880	Stom	protein_coding	2	35313986	35336976	stomatin [Source:MGI Symbol;Acc:MGI:95403]	0.774456	6.1058	8.03866	0.00457894	0.0347283
593	ENSMUSG00000026921.18	ENSMUSG00000026921	Egfl7	protein_coding	2	26580014	26593120	EGF-like domain 7 [Source:MGI Symbol;Acc:MGI:2449923]	-1.34755	5.97627	12.2557	0.000463842	0.00525843
594	ENSMUSG00000026932.14	ENSMUSG00000026932	Nacc2	protein_coding	2	26055535	26123220	nucleus accumbens associated 2, BEN and BTB (POZ) domain containing [Source:MGI Symbol;Acc:MGI:1915241]	1.16321	3.80071	11.5779	0.000667402	0.00724148
595	ENSMUSG00000026946.9	ENSMUSG00000026946	Nmi	protein_coding	2	51948487	51973494	N-myc (and STAT) interactor [Source:MGI Symbol;Acc:MGI:1928368]	-0.855154	4.68669	9.74828	0.00179491	0.0164687
596	ENSMUSG00000026970.16	ENSMUSG00000026970	Rbms1	protein_coding	2	60750193	60963192	RNA binding motif, single stranded interacting protein 1 [Source:MGI Symbol;Acc:MGI:1861774]	0.599972	5.90827	7.23517	0.00714889	0.0494078
597	ENSMUSG00000027002.13	ENSMUSG00000027002	Nckap1	protein_coding	2	80500512	80581380	NCK-associated protein 1 [Source:MGI Symbol;Acc:MGI:1355333]	1.18154	4.15807	14.2401	0.000160904	0.00212746
598	ENSMUSG00000027010.16	ENSMUSG00000027010	Slc25a12	protein_coding	2	71271063	71367749	solute carrier family 25 (mitochondrial carrier, Aralar), member 12 [Source:MGI Symbol;Acc:MGI:1926080]	-0.532155	6.07994	7.47755	0.00624729	0.0444182
599	ENSMUSG00000027011.14	ENSMUSG00000027011	Ube2e3	protein_coding	2	78868124	78921293	ubiquitin-conjugating enzyme E2E 3 [Source:MGI Symbol;Acc:MGI:107412]	-0.671147	6.52725	10.3987	0.00126103	0.0122752
600	ENSMUSG00000027035.10	ENSMUSG00000027035	Cers6	protein_coding	2	68861441	69114282	ceramide synthase 6 [Source:MGI Symbol;Acc:MGI:2442564]	1.12942	5.39399	14.2965	0.000156159	0.00207303
601	ENSMUSG00000027072.13	ENSMUSG00000027072	Prg3	protein_coding	2	84988215	84993886	proteoglycan 3 [Source:MGI Symbol;Acc:MGI:1858200]	3.36934	1.59025	8.15495	0.00429437	0.0332457
602	ENSMUSG00000027073.5	ENSMUSG00000027073	Prg2	protein_coding	2	84980461	84983632	proteoglycan 2, bone marrow [Source:MGI Symbol;Acc:MGI:103294]	2.49067	6.47374	8.34893	0.00385915	0.0305214
603	ENSMUSG00000027133.3	ENSMUSG00000027133	Nop10	protein_coding	2	112261926	112263269	NOP10 ribonucleoprotein [Source:MGI Symbol;Acc:MGI:1913431]	-0.805747	5.75128	9.36625	0.00221017	0.0195603
604	ENSMUSG00000027173.7	ENSMUSG00000027173	Depdc7	protein_coding	2	104721784	104742878	DEP domain containing 7 [Source:MGI Symbol;Acc:MGI:2139258]	1.52547	1.24439	12.1993	0.000478072	0.00539126
605	ENSMUSG00000027200.17	ENSMUSG00000027200	Sema6d	protein_coding	2	124089969	124667770	sema domain, transmembrane domain (TM), and cytoplasmic domain, (semaphorin) 6D [Source:MGI Symbol;Acc:MGI:2387661]	2.84855	4.10183	35.2546	2.89297e-09	1.15137e-07
606	ENSMUSG00000027203.15	ENSMUSG00000027203	Dut	protein_coding	2	125247190	125258608	deoxyuridine triphosphatase [Source:MGI Symbol;Acc:MGI:1346051]	-0.788073	6.86208	8.10653	0.0044106	0.0338277
607	ENSMUSG00000027208.14	ENSMUSG00000027208	Fgf7	protein_coding	2	126034658	126091185	fibroblast growth factor 7 [Source:MGI Symbol;Acc:MGI:95521]	2.72329	-0.93659	15.8053	7.02038e-05	0.00104017
608	ENSMUSG00000027219.13	ENSMUSG00000027219	Slc28a2	protein_coding	2	122426477	122461137	solute carrier family 28 (sodium-coupled nucleoside transporter), member 2 [Source:MGI Symbol;Acc:MGI:1913105]	-1.40774	5.11357	30.9477	2.65074e-08	8.78252e-07
609	ENSMUSG00000027221.5	ENSMUSG00000027221	Chst1	protein_coding	2	92599707	92615250	carbohydrate (keratan sulfate Gal-6) sulfotransferase 1 [Source:MGI Symbol;Acc:MGI:1924219]	2.98819	5.58039	18.1303	2.06295e-05	0.000357001
610	ENSMUSG00000027227.7	ENSMUSG00000027227	Sord	protein_coding	2	122234749	122265340	sorbitol dehydrogenase [Source:MGI Symbol;Acc:MGI:98266]	-1.16861	5.72182	20.8626	4.93432e-06	9.88863e-05
611	ENSMUSG00000027230.9	ENSMUSG00000027230	Creb3l1	protein_coding	2	91982328	92024502	cAMP responsive element binding protein 3-like 1 [Source:MGI Symbol;Acc:MGI:1347062]	1.89859	1.54105	19.1283	1.22217e-05	0.000223012
612	ENSMUSG00000027233.4	ENSMUSG00000027233	Patl2	protein_coding	2	122120108	122186189	protein associated with topoisomerase II homolog 2 (yeast) [Source:MGI Symbol;Acc:MGI:1914828]	-1.78737	-1.21293	9.68753	0.00185523	0.0168875
613	ENSMUSG00000027236.8	ENSMUSG00000027236	Eif3j1	protein_coding	2	122028546	122056598	eukaryotic translation initiation factor 3, subunit J1 [Source:MGI Symbol;Acc:MGI:1925905]	-1.0938	3.89691	16.5998	4.61568e-05	0.000722404
614	ENSMUSG00000027254.13	ENSMUSG00000027254	Map1a	protein_coding	2	121289600	121310832	microtubule-associated protein 1 A [Source:MGI Symbol;Acc:MGI:1306776]	2.12051	0.00282226	15.1672	9.83986e-05	0.00139923
615	ENSMUSG00000027297.14	ENSMUSG00000027297	Ltk	protein_coding	2	119751320	119760431	leukocyte tyrosine kinase [Source:MGI Symbol;Acc:MGI:96840]	3.71892	0.690967	27.0661	1.96615e-07	5.56373e-06
616	ENSMUSG00000027313.3	ENSMUSG00000027313	Chac1	protein_coding	2	119351229	119354381	ChaC, cation transport regulator 1 [Source:MGI Symbol;Acc:MGI:1916315]	3.61273	2.91102	30.9867	2.59798e-08	8.63665e-07
617	ENSMUSG00000027317.8	ENSMUSG00000027317	Ppp1r14d	protein_coding	2	119218119	119229906	protein phosphatase 1, regulatory inhibitor subunit 14D [Source:MGI Symbol;Acc:MGI:1919362]	3.09502	-1.98444	10.6257	0.00111529	0.0110856
618	ENSMUSG00000027322.11	ENSMUSG00000027322	Siglec1	protein_coding	2	131069220	131086765	sialic acid binding Ig-like lectin 1, sialoadhesin [Source:MGI Symbol;Acc:MGI:99668]	3.43053	0.534084	24.116	9.07042e-07	2.2315e-05
619	ENSMUSG00000027323.10	ENSMUSG00000027323	Rad51	protein_coding	2	119112793	119147445	RAD51 recombinase [Source:MGI Symbol;Acc:MGI:97890]	-0.713764	5.44094	8.73923	0.00311437	0.0257699
620	ENSMUSG00000027331.15	ENSMUSG00000027331	Knstrn	protein_coding	2	118814003	118853957	kinetochore-localized astrin/SPAG5 binding [Source:MGI Symbol;Acc:MGI:1289298]	-0.735179	5.79903	10.7715	0.00103072	0.0104125
621	ENSMUSG00000027332.11	ENSMUSG00000027332	Ivd	protein_coding	2	118861954	118882909	isovaleryl coenzyme A dehydrogenase [Source:MGI Symbol;Acc:MGI:1929242]	-0.893031	6.23092	18.4638	1.73159e-05	0.000304862
622	ENSMUSG00000027333.18	ENSMUSG00000027333	Smox	protein_coding	2	131491496	131525922	spermine oxidase [Source:MGI Symbol;Acc:MGI:2445356]	-0.856514	5.16956	9.70355	0.00183913	0.0168105
623	ENSMUSG00000027347.18	ENSMUSG00000027347	Rasgrp1	protein_coding	2	117279993	117343001	RAS guanyl releasing protein 1 [Source:MGI Symbol;Acc:MGI:1314635]	2.17273	4.69998	17.3952	3.03599e-05	0.000497942
624	ENSMUSG00000027359.16	ENSMUSG00000027359	Slc27a2	protein_coding	2	126552407	126588243	solute carrier family 27 (fatty acid transporter), member 2 [Source:MGI Symbol;Acc:MGI:1347099]	-2.99046	1.71016	32.5116	1.18483e-08	4.21508e-07
625	ENSMUSG00000027361.15	ENSMUSG00000027361	Gabpb1	protein_coding	2	126627442	126676337	GA repeat binding protein, beta 1 [Source:MGI Symbol;Acc:MGI:95611]	-0.578251	6.40669	7.38819	0.00656537	0.0461982
626	ENSMUSG00000027376.15	ENSMUSG00000027376	Prom2	protein_coding	2	127526473	127541467	prominin 2 [Source:MGI Symbol;Acc:MGI:2138997]	-2.89391	-0.759969	21.6584	3.25779e-06	6.8795e-05
627	ENSMUSG00000027412.12	ENSMUSG00000027412	Lpin3	protein_coding	2	160880670	160906002	lipin 3 [Source:MGI Symbol;Acc:MGI:1891342]	2.35763	0.246339	9.92651	0.00162915	0.0151645
628	ENSMUSG00000027429.16	ENSMUSG00000027429	Sec23b	protein_coding	2	144556229	144590749	SEC23 homolog B, COPII coat complex component [Source:MGI Symbol;Acc:MGI:1350925]	0.731027	6.37163	11.777	0.000599655	0.00657858
629	ENSMUSG00000027430.12	ENSMUSG00000027430	Dtd1	protein_coding	2	144599897	144768758	D-tyrosyl-tRNA deacylase 1 [Source:MGI Symbol;Acc:MGI:1913294]	-0.833087	4.56552	8.37695	0.0038001	0.030206
630	ENSMUSG00000027438.14	ENSMUSG00000027438	Napb	protein_coding	2	148693985	148732467	N-ethylmaleimide sensitive fusion protein attachment protein beta [Source:MGI Symbol;Acc:MGI:104562]	1.003	2.8113	8.72069	0.00314619	0.0259966
631	ENSMUSG00000027454.10	ENSMUSG00000027454	Gins1	protein_coding	2	150905400	150931280	GINS complex subunit 1 (Psf1 homolog) [Source:MGI Symbol;Acc:MGI:1916520]	-0.741616	4.42246	7.89741	0.00495056	0.03691
632	ENSMUSG00000027457.15	ENSMUSG00000027457	Snph	protein_coding	2	151590549	151632593	syntaphilin [Source:MGI Symbol;Acc:MGI:2139270]	2.27831	-1.37706	8.86294	0.00291018	0.0244016
633	ENSMUSG00000027472.14	ENSMUSG00000027472	Pdrg1	protein_coding	2	153008890	153015427	p53 and DNA damage regulated 1 [Source:MGI Symbol;Acc:MGI:1915809]	-0.910885	5.99508	13.6175	0.000224087	0.00284131
634	ENSMUSG00000027478.15	ENSMUSG00000027478	Dnmt3b	protein_coding	2	153649450	153687730	DNA methyltransferase 3B [Source:MGI Symbol;Acc:MGI:1261819]	-0.767517	6.36995	8.06233	0.0045195	0.034383
635	ENSMUSG00000027487.11	ENSMUSG00000027487	Cdk5rap1	protein_coding	2	154335380	154373010	CDK5 regulatory subunit associated protein 1 [Source:MGI Symbol;Acc:MGI:1914221]	-1.06503	3.65528	10.9594	0.000931302	0.00957939
636	ENSMUSG00000027505.2	ENSMUSG00000027505	Fam209	protein_coding	2	172472520	172474331	family with sequence similarity 209 [Source:MGI Symbol;Acc:MGI:1923676]	-1.89461	0.943493	8.35378	0.00384886	0.0304766
637	ENSMUSG00000027514.14	ENSMUSG00000027514	Zbp1	protein_coding	2	173206612	173218923	Z-DNA binding protein 1 [Source:MGI Symbol;Acc:MGI:1927449]	1.52269	4.92249	17.9812	2.23094e-05	0.000380743
638	ENSMUSG00000027524.9	ENSMUSG00000027524	Edn3	protein_coding	2	174760619	174784042	endothelin 3 [Source:MGI Symbol;Acc:MGI:95285]	-1.86255	-0.852064	8.93549	0.00279682	0.0236426
639	ENSMUSG00000027525.17	ENSMUSG00000027525	Phactr3	protein_coding	2	178118975	178338492	phosphatase and actin regulator 3 [Source:MGI Symbol;Acc:MGI:1921439]	7.41417	2.15785	128.095	1.06978e-29	3.58649e-27
640	ENSMUSG00000027546.15	ENSMUSG00000027546	Atp9a	protein_coding	2	168634438	168742409	ATPase, class II, type 9A [Source:MGI Symbol;Acc:MGI:1330826]	3.58837	5.77949	89.5737	2.95422e-21	5.26437e-19
641	ENSMUSG00000027556.15	ENSMUSG00000027556	Car1	protein_coding	3	14766216	14808368	carbonic anhydrase 1 [Source:MGI Symbol;Acc:MGI:88268]	1.85978	6.06888	18.7723	1.4729e-05	0.000264614
642	ENSMUSG00000027579.6	ENSMUSG00000027579	Srms	protein_coding	2	181205562	181213185	src-related kinase lacking C-terminal regulatory tyrosine and N-terminal myristylation sites [Source:MGI Symbol;Acc:MGI:101865]	1.66221	1.16363	13.5464	0.000232733	0.00292841
643	ENSMUSG00000027597.15	ENSMUSG00000027597	Ahcy	protein_coding	2	155059310	155074497	S-adenosylhomocysteine hydrolase [Source:MGI Symbol;Acc:MGI:87968]	-0.868625	4.98504	12.2477	0.000465839	0.00527737
644	ENSMUSG00000027603.15	ENSMUSG00000027603	Ggt7	protein_coding	2	155490379	155518237	gamma-glutamyltransferase 7 [Source:MGI Symbol;Acc:MGI:1913385]	2.07102	-0.8694	12.2819	0.00045738	0.00520339
645	ENSMUSG00000027605.18	ENSMUSG00000027605	Acss2	protein_coding	2	155517948	155585724	acyl-CoA synthetase short-chain family member 2 [Source:MGI Symbol;Acc:MGI:1890410]	-0.830816	4.56203	11.3282	0.000763385	0.00807905
646	ENSMUSG00000027610.17	ENSMUSG00000027610	Gss	protein_coding	2	155563181	155592810	glutathione synthetase [Source:MGI Symbol;Acc:MGI:95852]	-0.756914	4.07024	7.64418	0.00569557	0.0412971
647	ENSMUSG00000027663.12	ENSMUSG00000027663	Zmat3	protein_coding	3	32334792	32366014	zinc finger matrin type 3 [Source:MGI Symbol;Acc:MGI:1195270]	0.896211	3.22037	7.22088	0.00720603	0.049676
648	ENSMUSG00000027708.14	ENSMUSG00000027708	Dcun1d1	protein_coding	3	35892105	35937445	DCN1, defective in cullin neddylation 1, domain containing 1 (S. cerevisiae) [Source:MGI Symbol;Acc:MGI:2150386]	-0.803685	6.00909	13.337	0.000260219	0.00322186
649	ENSMUSG00000027714.11	ENSMUSG00000027714	Exosc9	protein_coding	3	36552606	36565727	exosome component 9 [Source:MGI Symbol;Acc:MGI:1355319]	-0.977253	4.51624	16.1845	5.74622e-05	0.000866312
650	ENSMUSG00000027750.16	ENSMUSG00000027750	Postn	protein_coding	3	54361109	54391037	periostin, osteoblast specific factor [Source:MGI Symbol;Acc:MGI:1926321]	2.09333	2.78562	32.0199	1.52604e-08	5.27776e-07
651	ENSMUSG00000027776.12	ENSMUSG00000027776	Il12a	protein_coding	3	68690644	68698547	interleukin 12a [Source:MGI Symbol;Acc:MGI:96539]	-0.973206	5.73448	13.3459	0.000258989	0.00321654
652	ENSMUSG00000027777.15	ENSMUSG00000027777	Schip1	protein_coding	3	68064802	68626481	schwannomin interacting protein 1 [Source:MGI Symbol;Acc:MGI:1353557]	3.21683	-2.37555	9.68753	0.00185523	0.0168875
653	ENSMUSG00000027799.12	ENSMUSG00000027799	Nbea	protein_coding	3	55625195	56183701	neurobeachin [Source:MGI Symbol;Acc:MGI:1347075]	1.02296	4.36279	8.64807	0.00327407	0.0268731
654	ENSMUSG00000027808.8	ENSMUSG00000027808	Serp1	protein_coding	3	58519817	58525892	stress-associated endoplasmic reticulum protein 1 [Source:MGI Symbol;Acc:MGI:92638]	1.41894	8.77894	14.4375	0.000144889	0.00193512
655	ENSMUSG00000027843.13	ENSMUSG00000027843	Ptpn22	protein_coding	3	103859795	103912247	protein tyrosine phosphatase, non-receptor type 22 (lymphoid) [Source:MGI Symbol;Acc:MGI:107170]	0.625392	6.08045	7.37359	0.00661887	0.0464919
656	ENSMUSG00000027863.8	ENSMUSG00000027863	Cd2	protein_coding	3	101275899	101287939	CD2 antigen [Source:MGI Symbol;Acc:MGI:88320]	2.68221	3.46254	19.4516	1.03179e-05	0.000191812
657	ENSMUSG00000027947.11	ENSMUSG00000027947	Il6ra	protein_coding	3	89864059	89913196	interleukin 6 receptor, alpha [Source:MGI Symbol;Acc:MGI:105304]	0.768429	6.01354	8.56273	0.00343114	0.0278773
658	ENSMUSG00000027962.14	ENSMUSG00000027962	Vcam1	protein_coding	3	116109949	116129688	vascular cell adhesion molecule 1 [Source:MGI Symbol;Acc:MGI:98926]	1.94965	3.16509	10.7603	0.00103699	0.0104438
659	ENSMUSG00000027968.11	ENSMUSG00000027968	Larp7	protein_coding	3	127536714	127553349	La ribonucleoprotein domain family, member 7 [Source:MGI Symbol;Acc:MGI:107634]	-0.650462	6.02964	8.42639	0.00369814	0.0295911
660	ENSMUSG00000027983.13	ENSMUSG00000027983	Cyp2u1	protein_coding	3	131288441	131303227	cytochrome P450, family 2, subfamily u, polypeptide 1 [Source:MGI Symbol;Acc:MGI:1918769]	1.92992	-0.71053	11.8967	0.000562325	0.00622079
661	ENSMUSG00000027995.10	ENSMUSG00000027995	Tlr2	protein_coding	3	83836272	83841767	toll-like receptor 2 [Source:MGI Symbol;Acc:MGI:1346060]	0.854586	4.12494	8.73946	0.00311397	0.0257699
662	ENSMUSG00000028019.9	ENSMUSG00000028019	Pdgfc	protein_coding	3	81036416	81214040	platelet-derived growth factor, C polypeptide [Source:MGI Symbol;Acc:MGI:1859631]	1.94816	0.91367	19.5546	9.77632e-06	0.000182775
663	ENSMUSG00000028028.11	ENSMUSG00000028028	Alpk1	protein_coding	3	127670310	127780527	alpha-kinase 1 [Source:MGI Symbol;Acc:MGI:1918731]	1.14137	4.69208	13.6634	0.000218676	0.00277982
664	ENSMUSG00000028040.7	ENSMUSG00000028040	Efna4	protein_coding	3	89333390	89338028	ephrin A4 [Source:MGI Symbol;Acc:MGI:106643]	-1.43357	1.915	14.3303	0.000153373	0.00203879
665	ENSMUSG00000028042.15	ENSMUSG00000028042	Zbtb7b	protein_coding	3	89377644	89394776	zinc finger and BTB domain containing 7B [Source:MGI Symbol;Acc:MGI:102755]	1.24898	4.99636	9.32648	0.00225866	0.0198915
666	ENSMUSG00000028064.17	ENSMUSG00000028064	Sema4a	protein_coding	3	88435959	88461182	sema domain, immunoglobulin domain (Ig), transmembrane domain (TM) and short cytoplasmic domain, (semaphorin) 4A [Source:MGI Symbol;Acc:MGI:107560]	1.26049	6.1326	7.94452	0.00482332	0.0362069
667	ENSMUSG00000028066.15	ENSMUSG00000028066	Pmf1	protein_coding	3	88394143	88410331	polyamine-modulated factor 1 [Source:MGI Symbol;Acc:MGI:1914287]	-0.754577	5.84047	9.47009	0.00208849	0.0186925
668	ENSMUSG00000028071.12	ENSMUSG00000028071	Sh2d2a	protein_coding	3	87846755	87855722	SH2 domain containing 2A [Source:MGI Symbol;Acc:MGI:1351596]	1.74155	4.34449	12.2869	0.000456144	0.00519873
669	ENSMUSG00000028078.14	ENSMUSG00000028078	Dclk2	protein_coding	3	86786151	86920852	doublecortin-like kinase 2 [Source:MGI Symbol;Acc:MGI:1918012]	1.07217	6.0347	16.2799	5.46411e-05	0.000831386
670	ENSMUSG00000028081.6	ENSMUSG00000028081	Rps3a1	protein_coding	3	86137940	86142702	ribosomal protein S3A1 [Source:MGI Symbol;Acc:MGI:1202063]	-1.27737	9.66404	7.56808	0.00594109	0.0427171
671	ENSMUSG00000028086.15	ENSMUSG00000028086	Fbxw7	protein_coding	3	84815268	84979198	F-box and WD-40 domain protein 7 [Source:MGI Symbol;Acc:MGI:1354695]	1.02289	5.91809	17.9067	2.31997e-05	0.000393898
672	ENSMUSG00000028121.8	ENSMUSG00000028121	Bcar3	protein_coding	3	122294136	122530191	breast cancer anti-estrogen resistance 3 [Source:MGI Symbol;Acc:MGI:1352501]	2.54767	4.50462	21.0122	4.56359e-06	9.27727e-05
673	ENSMUSG00000028132.15	ENSMUSG00000028132	Tmem56	protein_coding	3	121201761	121283098	transmembrane protein 56 [Source:MGI Symbol;Acc:MGI:1923195]	2.00291	2.90683	15.7778	7.12353e-05	0.00105405
674	ENSMUSG00000028211.11	ENSMUSG00000028211	Trp53inp1	protein_coding	4	11156431	11174379	transformation related protein 53 inducible nuclear protein 1 [Source:MGI Symbol;Acc:MGI:1926609]	1.96132	7.9644	26.4135	2.75611e-07	7.52982e-06
675	ENSMUSG00000028218.19	ENSMUSG00000028218	Fam92a	protein_coding	4	12153409	12172015	family with sequence similarity 92, member A [Source:MGI Symbol;Acc:MGI:1915349]	-0.706355	4.87335	7.28188	0.00696535	0.048342
676	ENSMUSG00000028226.15	ENSMUSG00000028226	Mmp16	protein_coding	4	17852893	18119145	matrix metallopeptidase 16 [Source:MGI Symbol;Acc:MGI:1276107]	3.82548	1.89204	51.3647	7.67065e-13	5.25002e-11
677	ENSMUSG00000028246.13	ENSMUSG00000028246	Faxc	protein_coding	4	21931329	21996839	failed axon connections homolog [Source:MGI Symbol;Acc:MGI:1923382]	2.25614	1.59892	20.7946	5.11275e-06	0.000101946
678	ENSMUSG00000028251.5	ENSMUSG00000028251	Tstd3	protein_coding	4	21757382	21767212	thiosulfate sulfurtransferase (rhodanese)-like domain containing 3 [Source:MGI Symbol;Acc:MGI:1924282]	1.26528	1.70626	9.64293	0.00190082	0.0172707
679	ENSMUSG00000028268.14	ENSMUSG00000028268	Gbp3	protein_coding	3	142560026	142573209	guanylate binding protein 3 [Source:MGI Symbol;Acc:MGI:1926263]	0.726344	5.62749	12.4994	0.000407084	0.00471989
680	ENSMUSG00000028273.15	ENSMUSG00000028273	Pdlim5	protein_coding	3	142239590	142395696	PDZ and LIM domain 5 [Source:MGI Symbol;Acc:MGI:1927489]	0.67093	4.92297	7.80865	0.00519967	0.038434
681	ENSMUSG00000028277.13	ENSMUSG00000028277	Ube2j1	protein_coding	4	33031416	33052363	ubiquitin-conjugating enzyme E2J 1 [Source:MGI Symbol;Acc:MGI:1926245]	1.11351	7.37437	15.9339	6.55932e-05	0.000978457
682	ENSMUSG00000028278.14	ENSMUSG00000028278	Rragd	protein_coding	4	32983037	33022180	Ras-related GTP binding D [Source:MGI Symbol;Acc:MGI:1098604]	1.33149	1.30439	8.36254	0.00383034	0.0303664
683	ENSMUSG00000028289.12	ENSMUSG00000028289	Epha7	protein_coding	4	28813131	28967499	Eph receptor A7 [Source:MGI Symbol;Acc:MGI:95276]	-1.49325	2.20126	10.9605	0.000930743	0.00957861
684	ENSMUSG00000028327.14	ENSMUSG00000028327	Stra6l	protein_coding	4	45848664	45887008	STRA6-like [Source:MGI Symbol;Acc:MGI:1921402]	2.8718	-1.525	16.3296	5.32259e-05	0.000814237
685	ENSMUSG00000028347.14	ENSMUSG00000028347	Tmeff1	protein_coding	4	48585174	48663131	transmembrane protein with EGF-like and two follistatin-like domains 1 [Source:MGI Symbol;Acc:MGI:1926810]	1.4711	0.41402	9.43838	0.00212491	0.0189583
686	ENSMUSG00000028362.2	ENSMUSG00000028362	Tnfsf8	protein_coding	4	63831308	63861347	tumor necrosis factor (ligand) superfamily, member 8 [Source:MGI Symbol;Acc:MGI:88328]	1.20651	2.67067	10.2868	0.00133982	0.0129402
687	ENSMUSG00000028381.8	ENSMUSG00000028381	Ugcg	protein_coding	4	59189257	59222833	UDP-glucose ceramide glucosyltransferase [Source:MGI Symbol;Acc:MGI:1332243]	0.997402	6.72616	20.1049	7.33097e-06	0.000142122
688	ENSMUSG00000028392.15	ENSMUSG00000028392	Bspry	protein_coding	4	62480053	62497298	B-box and SPRY domain containing [Source:MGI Symbol;Acc:MGI:2177191]	1.30427	2.67741	8.42317	0.00370469	0.0296316
689	ENSMUSG00000028393.10	ENSMUSG00000028393	Alad	protein_coding	4	62509169	62519918	aminolevulinate, delta-, dehydratase [Source:MGI Symbol;Acc:MGI:96853]	1.30201	6.37824	17.8442	2.39746e-05	0.000404746
690	ENSMUSG00000028412.17	ENSMUSG00000028412	Slc44a1	protein_coding	4	53440413	53622478	solute carrier family 44, member 1 [Source:MGI Symbol;Acc:MGI:2140592]	1.49778	5.88998	25.112	5.40945e-07	1.386e-05
691	ENSMUSG00000028420.13	ENSMUSG00000028420	Tmem38b	protein_coding	4	53826045	53862019	transmembrane protein 38B [Source:MGI Symbol;Acc:MGI:1098718]	0.91925	4.33136	9.53582	0.00201501	0.0181332
692	ENSMUSG00000028456.18	ENSMUSG00000028456	Unc13b	protein_coding	4	43058953	43264871	unc-13 homolog B [Source:MGI Symbol;Acc:MGI:1342278]	2.12791	3.55431	30.8008	2.85926e-08	9.39472e-07
693	ENSMUSG00000028464.16	ENSMUSG00000028464	Tpm2	protein_coding	4	43514711	43523765	tropomyosin 2, beta [Source:MGI Symbol;Acc:MGI:98810]	-1.4454	3.6414	16.3371	5.30147e-05	0.000811634
694	ENSMUSG00000028479.18	ENSMUSG00000028479	Gne	protein_coding	4	44034075	44084177	glucosamine (UDP-N-acetyl)-2-epimerase/N-acetylmannosamine kinase [Source:MGI Symbol;Acc:MGI:1354951]	0.65612	6.30606	7.77802	0.00528859	0.0390184
695	ENSMUSG00000028524.21	ENSMUSG00000028524	Sgip1	protein_coding	4	102741297	102973628	SH3-domain GRB2-like (endophilin) interacting protein 1 [Source:MGI Symbol;Acc:MGI:1920344]	1.84069	2.97382	19.3762	1.07336e-05	0.000198792
696	ENSMUSG00000028549.17	ENSMUSG00000028549	Itgb3bp	protein_coding	4	99765402	99929813	integrin beta 3 binding protein (beta3-endonexin) [Source:MGI Symbol;Acc:MGI:1914983]	-1.53368	3.37326	20.0511	7.54006e-06	0.000145742
697	ENSMUSG00000028551.14	ENSMUSG00000028551	Cdkn2c	protein_coding	4	109660876	109667189	cyclin dependent kinase inhibitor 2C [Source:MGI Symbol;Acc:MGI:105388]	-0.749867	4.95621	9.9117	0.00164231	0.0152583
698	ENSMUSG00000028619.15	ENSMUSG00000028619	Tceanc2	protein_coding	4	107134155	107179116	transcription elongation factor A (SII) N-terminal and central domain containing 2 [Source:MGI Symbol;Acc:MGI:1913776]	-3.20197	4.14051	122.693	1.62795e-28	5.19369e-26
699	ENSMUSG00000028634.17	ENSMUSG00000028634	Hivep3	protein_coding	4	119733784	120138045	human immunodeficiency virus type I enhancer binding protein 3 [Source:MGI Symbol;Acc:MGI:106589]	1.06082	4.64606	12.6229	0.000381057	0.00446523
700	ENSMUSG00000028644.16	ENSMUSG00000028644	Ermap	protein_coding	4	119175457	119190011	erythroblast membrane-associated protein [Source:MGI Symbol;Acc:MGI:1349816]	1.7421	5.00126	13.299	0.000265542	0.00328481
701	ENSMUSG00000028648.13	ENSMUSG00000028648	Ndufs5	protein_coding	4	123712710	123718202	NADH:ubiquinone oxidoreductase core subunit S5 [Source:MGI Symbol;Acc:MGI:1890889]	-3.87178	2.14408	53.2958	2.86925e-13	2.03419e-11
702	ENSMUSG00000028651.12	ENSMUSG00000028651	Ppie	protein_coding	4	123127115	123139951	peptidylprolyl isomerase E (cyclophilin E) [Source:MGI Symbol;Acc:MGI:1917118]	-0.856799	5.57631	10.2566	0.00136194	0.0130709
703	ENSMUSG00000028664.14	ENSMUSG00000028664	Ephb2	protein_coding	4	136647539	136835988	Eph receptor B2 [Source:MGI Symbol;Acc:MGI:99611]	-1.14415	4.16626	9.41137	0.00215644	0.0191791
704	ENSMUSG00000028677.19	ENSMUSG00000028677	Rnf220	protein_coding	4	117271463	117497052	ring finger protein 220 [Source:MGI Symbol;Acc:MGI:1913993]	-0.699789	7.59915	8.03254	0.00459444	0.0348192
705	ENSMUSG00000028689.14	ENSMUSG00000028689	Ccdc163	protein_coding	4	116708509	116751206	coiled-coil domain containing 163 [Source:MGI Symbol;Acc:MGI:1915644]	-1.48332	4.3996	28.9748	7.33267e-08	2.23482e-06
706	ENSMUSG00000028691.12	ENSMUSG00000028691	Prdx1	protein_coding	4	116685544	116700822	peroxiredoxin 1 [Source:MGI Symbol;Acc:MGI:99523]	-0.774518	6.98506	9.21079	0.00240592	0.0209674
707	ENSMUSG00000028708.16	ENSMUSG00000028708	Mknk1	protein_coding	4	115839198	115879250	MAP kinase-interacting serine/threonine kinase 1 [Source:MGI Symbol;Acc:MGI:894316]	0.61081	5.87302	8.09165	0.00444696	0.0340802
708	ENSMUSG00000028763.17	ENSMUSG00000028763	Hspg2	protein_coding	4	137468769	137570630	perlecan (heparan sulfate proteoglycan 2) [Source:MGI Symbol;Acc:MGI:96257]	2.33725	1.78837	20.5815	5.71459e-06	0.000113384
709	ENSMUSG00000028766.10	ENSMUSG00000028766	Alpl	protein_coding	4	137741733	137796384	alkaline phosphatase, liver/bone/kidney [Source:MGI Symbol;Acc:MGI:87983]	2.08923	2.20857	24.9011	6.03467e-07	1.5402e-05
710	ENSMUSG00000028777.8	ENSMUSG00000028777	Gnat3	protein_coding	5	17962549	18019834	guanine nucleotide binding protein, alpha transducing 3 [Source:MGI Symbol;Acc:MGI:3588268]	3.33315	-2.60596	8.13649	0.00433832	0.0334549
711	ENSMUSG00000028782.14	ENSMUSG00000028782	Adgrb2	protein_coding	4	129984870	130022633	adhesion G protein-coupled receptor B2 [Source:MGI Symbol;Acc:MGI:2451244]	1.13216	1.25788	9.08404	0.0025785	0.0221078
712	ENSMUSG00000028795.15	ENSMUSG00000028795	Ccdc28b	protein_coding	4	129619274	129623947	coiled coil domain containing 28B [Source:MGI Symbol;Acc:MGI:1913514]	-0.745418	4.28822	8.00714	0.00465931	0.0351895
713	ENSMUSG00000028801.14	ENSMUSG00000028801	Stpg1	protein_coding	4	135494790	135537803	sperm tail PG rich repeat containing 1 [Source:MGI Symbol;Acc:MGI:1926056]	-5.85368	-2.0797	20.3468	6.46006e-06	0.000127018
714	ENSMUSG00000028832.11	ENSMUSG00000028832	Stmn1	protein_coding	4	134468320	134473843	stathmin 1 [Source:MGI Symbol;Acc:MGI:96739]	-1.20931	7.13943	17.4764	2.90894e-05	0.000479091
715	ENSMUSG00000028838.11	ENSMUSG00000028838	Extl1	protein_coding	4	134356372	134383850	exostoses (multiple)-like 1 [Source:MGI Symbol;Acc:MGI:1888742]	-1.21145	0.338335	7.28	0.00697264	0.0483587
716	ENSMUSG00000028865.14	ENSMUSG00000028865	Cd164l2	protein_coding	4	133212131	133224555	CD164 sialomucin-like 2 [Source:MGI Symbol;Acc:MGI:1916905]	-3.84381	-1.65716	9.20226	0.00241716	0.0210155
717	ENSMUSG00000028874.14	ENSMUSG00000028874	Fgr	protein_coding	4	132974095	133001910	FGR proto-oncogene, Src family tyrosine kinase [Source:MGI Symbol;Acc:MGI:95527]	1.48809	4.90919	7.63389	0.00572815	0.0414573
718	ENSMUSG00000028885.8	ENSMUSG00000028885	Smpdl3b	protein_coding	4	132732966	132757252	sphingomyelin phosphodiesterase, acid-like 3B [Source:MGI Symbol;Acc:MGI:1916022]	1.48514	0.0124286	7.33585	0.00675926	0.047239
719	ENSMUSG00000028909.17	ENSMUSG00000028909	Ptpru	protein_coding	4	131768457	131838288	protein tyrosine phosphatase, receptor type, U [Source:MGI Symbol;Acc:MGI:1321151]	1.54833	2.27132	13.818	0.000201395	0.00259262
720	ENSMUSG00000028910.12	ENSMUSG00000028910	Mecr	protein_coding	4	131843470	131867786	mitochondrial trans-2-enoyl-CoA reductase [Source:MGI Symbol;Acc:MGI:1349441]	-0.825364	4.57208	10.161	0.00143444	0.0136148
721	ENSMUSG00000028927.6	ENSMUSG00000028927	Padi2	protein_coding	4	140906344	140952586	peptidyl arginine deiminase, type II [Source:MGI Symbol;Acc:MGI:1338892]	0.934719	5.77683	11.8847	0.000565978	0.00625422
722	ENSMUSG00000028944.14	ENSMUSG00000028944	Prkag2	protein_coding	5	24862744	25100642	protein kinase, AMP-activated, gamma 2 non-catalytic subunit [Source:MGI Symbol;Acc:MGI:1336153]	-0.682926	6.07556	11.2679	0.00078859	0.00831467
723	ENSMUSG00000028964.14	ENSMUSG00000028964	Park7	protein_coding	4	150897133	150914437	Parkinson disease (autosomal recessive, early onset) 7 [Source:MGI Symbol;Acc:MGI:2135637]	-0.770274	7.01938	8.32541	0.00390942	0.0308327
724	ENSMUSG00000028965.13	ENSMUSG00000028965	Tnfrsf9	protein_coding	4	150914562	150946102	tumor necrosis factor receptor superfamily, member 9 [Source:MGI Symbol;Acc:MGI:1101059]	2.36435	1.66154	19.6361	9.36838e-06	0.000176482
725	ENSMUSG00000028967.10	ENSMUSG00000028967	Errfi1	protein_coding	4	150853919	150868892	ERBB receptor feedback inhibitor 1 [Source:MGI Symbol;Acc:MGI:1921405]	1.22396	2.17362	7.58685	0.00587955	0.042367
726	ENSMUSG00000028971.4	ENSMUSG00000028971	Cort	protein_coding	4	149125034	149126763	cortistatin [Source:MGI Symbol;Acc:MGI:109538]	1.95693	0.706184	16.1355	5.89697e-05	0.000888364
727	ENSMUSG00000028973.18	ENSMUSG00000028973	Abcb8	protein_coding	5	24393663	24410054	ATP-binding cassette, sub-family B (MDR/TAP), member 8 [Source:MGI Symbol;Acc:MGI:1351667]	-0.638294	5.60311	9.00657	0.0026901	0.022896
728	ENSMUSG00000028979.17	ENSMUSG00000028979	Masp2	protein_coding	4	148602554	148615499	mannan-binding lectin serine peptidase 2 [Source:MGI Symbol;Acc:MGI:1330832]	4.16008	1.82423	68.5831	1.21645e-16	1.32936e-14
729	ENSMUSG00000028989.3	ENSMUSG00000028989	Angptl7	protein_coding	4	148495183	148500460	angiopoietin-like 7 [Source:MGI Symbol;Acc:MGI:3605801]	3.69123	-1.07608	29.9079	4.53063e-08	1.44077e-06
730	ENSMUSG00000028999.15	ENSMUSG00000028999	Rint1	protein_coding	5	23787711	23820369	RAD50 interactor 1 [Source:MGI Symbol;Acc:MGI:1916233]	0.91523	5.53611	17.1396	3.47306e-05	0.000559738
731	ENSMUSG00000029001.15	ENSMUSG00000029001	Fbxo44	protein_coding	4	148152800	148160482	F-box protein 44 [Source:MGI Symbol;Acc:MGI:1354744]	-1.66239	2.33229	16.2443	5.56779e-05	0.000844562
732	ENSMUSG00000029005.4	ENSMUSG00000029005	Draxin	protein_coding	4	148098437	148130698	dorsal inhibitory axon guidance protein [Source:MGI Symbol;Acc:MGI:1917683]	-5.84544	-2.23724	17.4234	2.99113e-05	0.0004914
733	ENSMUSG00000029007.8	ENSMUSG00000029007	Agtrap	protein_coding	4	148077061	148088031	angiotensin II, type I receptor-associated protein [Source:MGI Symbol;Acc:MGI:1339977]	-0.915713	6.16837	18.6382	1.58021e-05	0.000280831
734	ENSMUSG00000029016.13	ENSMUSG00000029016	Clcn6	protein_coding	4	148004259	148038821	chloride channel, voltage-sensitive 6 [Source:MGI Symbol;Acc:MGI:1347049]	0.727141	5.2897	13.2258	0.000276116	0.00338597
735	ENSMUSG00000029022.18	ENSMUSG00000029022	Miip	protein_coding	4	147860778	147868816	migration and invasion inhibitory protein [Source:MGI Symbol;Acc:MGI:106506]	-1.18543	5.64206	22.2501	2.39351e-06	5.25739e-05
736	ENSMUSG00000029054.8	ENSMUSG00000029054	Gabrd	protein_coding	4	155384980	155398112	gamma-aminobutyric acid (GABA) A receptor, subunit delta [Source:MGI Symbol;Acc:MGI:95622]	-6.62171	-1.9122	23.9718	9.77569e-07	2.36965e-05
737	ENSMUSG00000029084.5	ENSMUSG00000029084	Cd38	protein_coding	5	43868553	43912375	CD38 antigen [Source:MGI Symbol;Acc:MGI:107474]	1.36329	2.99559	14.2084	0.000163639	0.00216073
738	ENSMUSG00000029089.8	ENSMUSG00000029089	5730480H06Rik	protein_coding	5	48327952	48414294	RIKEN cDNA 5730480H06 gene [Source:MGI Symbol;Acc:MGI:1917842]	-1.06887	3.68328	14.1317	0.000170451	0.00223872
739	ENSMUSG00000029093.14	ENSMUSG00000029093	Sorcs2	protein_coding	5	36017180	36398139	sortilin-related VPS10 domain containing receptor 2 [Source:MGI Symbol;Acc:MGI:1932289]	1.29352	4.26116	18.8233	1.43404e-05	0.000258808
740	ENSMUSG00000029095.17	ENSMUSG00000029095	Ablim2	protein_coding	5	35757880	35884973	actin-binding LIM protein 2 [Source:MGI Symbol;Acc:MGI:2385758]	1.44603	0.766978	9.61177	0.00193335	0.0175179
741	ENSMUSG00000029096.15	ENSMUSG00000029096	Htra3	protein_coding	5	35652023	35679782	HtrA serine peptidase 3 [Source:MGI Symbol;Acc:MGI:1925808]	2.06088	3.32188	12.8919	0.000330001	0.00395122
742	ENSMUSG00000029119.9	ENSMUSG00000029119	Man2b2	protein_coding	5	36806921	36830653	mannosidase 2, alpha B2 [Source:MGI Symbol;Acc:MGI:1195262]	0.739413	6.46587	12.7036	0.000364954	0.00429945
743	ENSMUSG00000029120.10	ENSMUSG00000029120	Ppp2r2c	protein_coding	5	36868513	36955078	protein phosphatase 2, regulatory subunit B, gamma [Source:MGI Symbol;Acc:MGI:2442660]	4.65428	-0.96612	36.16	1.81765e-09	7.4437e-08
744	ENSMUSG00000029122.11	ENSMUSG00000029122	Evc	protein_coding	5	37289098	37336894	EvC ciliary complex subunit 1 [Source:MGI Symbol;Acc:MGI:1890596]	1.43007	4.17608	10.2171	0.00139143	0.013283
745	ENSMUSG00000029166.14	ENSMUSG00000029166	Mapre3	protein_coding	5	30814641	30866106	microtubule-associated protein, RP/EB family, member 3 [Source:MGI Symbol;Acc:MGI:2140967]	0.953135	3.62767	7.40819	0.00649276	0.0457849
746	ENSMUSG00000029167.13	ENSMUSG00000029167	Ppargc1a	protein_coding	5	51454250	51567726	peroxisome proliferative activated receptor, gamma, coactivator 1 alpha [Source:MGI Symbol;Acc:MGI:1342774]	-2.69536	0.854434	28.0915	1.15712e-07	3.39079e-06
747	ENSMUSG00000029168.14	ENSMUSG00000029168	Dpysl5	protein_coding	5	30711564	30799375	dihydropyrimidinase-like 5 [Source:MGI Symbol;Acc:MGI:1929772]	2.63611	-2.51339	12.0618	0.000514645	0.00575774
748	ENSMUSG00000029196.9	ENSMUSG00000029196	Tada2b	protein_coding	5	36473670	36484285	transcriptional adaptor 2B [Source:MGI Symbol;Acc:MGI:3035274]	1.60163	4.03975	31.8012	1.70787e-08	5.84457e-07
749	ENSMUSG00000029211.11	ENSMUSG00000029211	Gabra4	protein_coding	5	71569749	71658308	gamma-aminobutyric acid (GABA) A receptor, subunit alpha 4 [Source:MGI Symbol;Acc:MGI:95616]	3.6793	2.51657	40.6512	1.81974e-10	8.75777e-09
750	ENSMUSG00000029223.12	ENSMUSG00000029223	Uchl1	protein_coding	5	66676091	66687234	ubiquitin carboxy-terminal hydrolase L1 [Source:MGI Symbol;Acc:MGI:103149]	-2.19392	2.63617	26.6094	2.49023e-07	6.86027e-06
751	ENSMUSG00000029245.16	ENSMUSG00000029245	Epha5	protein_coding	5	84054761	84417382	Eph receptor A5 [Source:MGI Symbol;Acc:MGI:99654]	-2.17397	-1.98506	8.01524	0.00463853	0.0350815
752	ENSMUSG00000029254.16	ENSMUSG00000029254	Stap1	protein_coding	5	86071746	86106125	signal transducing adaptor family member 1 [Source:MGI Symbol;Acc:MGI:1926193]	-0.613358	5.74068	8.45103	0.00364838	0.0292996
753	ENSMUSG00000029290.12	ENSMUSG00000029290	Zfp326	protein_coding	5	105876565	105915818	zinc finger protein 326 [Source:MGI Symbol;Acc:MGI:1927246]	-0.559217	5.9833	7.2264	0.00718392	0.0495887
754	ENSMUSG00000029298.15	ENSMUSG00000029298	Gbp9	protein_coding	5	105077630	105139539	guanylate-binding protein 9 [Source:MGI Symbol;Acc:MGI:3605620]	1.83633	5.36583	30.5231	3.29914e-08	1.07507e-06
755	ENSMUSG00000029314.14	ENSMUSG00000029314	Gpat3	protein_coding	5	100845713	100899102	glycerol-3-phosphate acyltransferase 3 [Source:MGI Symbol;Acc:MGI:3603816]	1.52241	2.24473	12.9086	0.000327082	0.0039191
756	ENSMUSG00000029343.17	ENSMUSG00000029343	Crybb1	protein_coding	5	112255815	112269585	crystallin, beta B1 [Source:MGI Symbol;Acc:MGI:104992]	2.95277	-0.490905	14.0943	0.000173868	0.00227906
757	ENSMUSG00000029369.17	ENSMUSG00000029369	Afm	protein_coding	5	90518932	90553543	afamin [Source:MGI Symbol;Acc:MGI:2429409]	-6.79433	-1.27468	30.2411	3.81534e-08	1.23313e-06
758	ENSMUSG00000029380.11	ENSMUSG00000029380	Cxcl1	protein_coding	5	90891241	90893115	chemokine (C-X-C motif) ligand 1 [Source:MGI Symbol;Acc:MGI:108068]	2.71511	-1.75536	9.05598	0.00261837	0.0224108
759	ENSMUSG00000029403.14	ENSMUSG00000029403	Cdkl2	protein_coding	5	92006074	92043883	cyclin-dependent kinase-like 2 (CDC2-related kinase) [Source:MGI Symbol;Acc:MGI:1858227]	2.69455	0.446039	27.4914	1.57796e-07	4.54748e-06
760	ENSMUSG00000029407.10	ENSMUSG00000029407	Uso1	protein_coding	5	92137938	92202798	USO1 vesicle docking factor [Source:MGI Symbol;Acc:MGI:1929095]	1.10502	6.95674	21.4338	3.6625e-06	7.60969e-05
761	ENSMUSG00000029469.14	ENSMUSG00000029469	Ift81	protein_coding	5	122550204	122614518	intraflagellar transport 81 [Source:MGI Symbol;Acc:MGI:1098597]	-0.881165	3.54849	9.24833	0.00235711	0.0206117
762	ENSMUSG00000029503.16	ENSMUSG00000029503	P2rx2	protein_coding	5	110339812	110343212	purinergic receptor P2X, ligand-gated ion channel, 2 [Source:MGI Symbol;Acc:MGI:2665170]	-1.78421	0.373328	8.02512	0.00461331	0.034922
763	ENSMUSG00000029552.19	ENSMUSG00000029552	Tes	protein_coding	6	17065149	17105828	testis derived transcript [Source:MGI Symbol;Acc:MGI:105081]	-0.74609	6.51773	11.539	0.000681523	0.00735435
764	ENSMUSG00000029563.16	ENSMUSG00000029563	Foxp2	protein_coding	6	14901349	15441977	forkhead box P2 [Source:MGI Symbol;Acc:MGI:2148705]	3.13056	1.79829	22.0114	2.71038e-06	5.85172e-05
765	ENSMUSG00000029570.5	ENSMUSG00000029570	Lfng	protein_coding	5	140607320	140615545	LFNG O-fucosylpeptide 3-beta-N-acetylglucosaminyltransferase [Source:MGI Symbol;Acc:MGI:1095413]	0.777351	5.71134	10.1387	0.00145188	0.0137408
766	ENSMUSG00000029629.17	ENSMUSG00000029629	Phf14	protein_coding	6	11907809	12081205	PHD finger protein 14 [Source:MGI Symbol;Acc:MGI:1923539]	-0.742015	6.75415	12.1111	0.000501214	0.00562338
767	ENSMUSG00000029632.7	ENSMUSG00000029632	Ndufa4	protein_coding	6	11900292	11907497	Ndufa4, mitochondrial complex associated [Source:MGI Symbol;Acc:MGI:107686]	-0.852174	6.7939	10.4936	0.00119789	0.0117882
768	ENSMUSG00000029633.9	ENSMUSG00000029633	Gm5578	processed_pseudogene	6	112605544	112606779	predicted pseudogene 5578 [Source:MGI Symbol;Acc:MGI:3645010]	1.97592	-0.938836	11.2402	0.000800465	0.00842163
769	ENSMUSG00000029638.17	ENSMUSG00000029638	Glcci1	protein_coding	6	8509600	8597548	glucocorticoid induced transcript 1 [Source:MGI Symbol;Acc:MGI:2179717]	3.2664	4.06798	47.7721	4.78755e-12	2.96858e-10
770	ENSMUSG00000029650.10	ENSMUSG00000029650	Slc46a3	protein_coding	5	147878437	147894815	solute carrier family 46, member 3 [Source:MGI Symbol;Acc:MGI:1918956]	0.971432	3.53462	7.68619	0.00556451	0.0405009
771	ENSMUSG00000029657.15	ENSMUSG00000029657	Hsph1	protein_coding	5	149614287	149636376	heat shock 105kDa/110kDa protein 1 [Source:MGI Symbol;Acc:MGI:105053]	0.983889	6.98864	8.8673	0.00290324	0.0243537
772	ENSMUSG00000029658.17	ENSMUSG00000029658	Wdr95	protein_coding	5	149528679	149611894	WD40 repeat domain 95 [Source:MGI Symbol;Acc:MGI:1923042]	2.76792	0.248803	14.5996	0.000132941	0.00180727
773	ENSMUSG00000029661.16	ENSMUSG00000029661	Col1a2	protein_coding	6	4504814	4541544	collagen, type I, alpha 2 [Source:MGI Symbol;Acc:MGI:88468]	1.5081	3.22708	9.76624	0.00177746	0.016345
774	ENSMUSG00000029676.15	ENSMUSG00000029676	Pot1a	protein_coding	6	25743737	25809246	protection of telomeres 1A [Source:MGI Symbol;Acc:MGI:2141503]	-0.701175	5.30101	10.809	0.0010101	0.0102303
775	ENSMUSG00000029710.15	ENSMUSG00000029710	Ephb4	protein_coding	5	137350109	137378669	Eph receptor B4 [Source:MGI Symbol;Acc:MGI:104757]	1.32783	2.7753	12.0567	0.000516062	0.00577033
776	ENSMUSG00000029716.13	ENSMUSG00000029716	Tfr2	protein_coding	5	137569840	137587481	transferrin receptor 2 [Source:MGI Symbol;Acc:MGI:1354956]	-0.971271	6.31976	15.1921	9.71066e-05	0.00138284
777	ENSMUSG00000029718.14	ENSMUSG00000029718	Pcolce	protein_coding	5	137605103	137613784	procollagen C-endopeptidase enhancer protein [Source:MGI Symbol;Acc:MGI:105099]	-1.43496	1.23864	10.9238	0.00094937	0.00973485
778	ENSMUSG00000029752.12	ENSMUSG00000029752	Asns	protein_coding	6	7675169	7693254	asparagine synthetase [Source:MGI Symbol;Acc:MGI:1350929]	1.30613	4.80893	14.8542	0.000116149	0.00160997
779	ENSMUSG00000029759.9	ENSMUSG00000029759	Pon3	protein_coding	6	5220852	5256286	paraoxonase 3 [Source:MGI Symbol;Acc:MGI:106686]	2.48395	6.27252	68.1745	1.49646e-16	1.6087e-14
780	ENSMUSG00000029797.13	ENSMUSG00000029797	Sspo	protein_coding	6	48448229	48501250	SCO-spondin [Source:MGI Symbol;Acc:MGI:2674311]	1.86256	4.61788	14.5356	0.000137535	0.00185443
781	ENSMUSG00000029798.11	ENSMUSG00000029798	Herc6	protein_coding	6	57581000	57664632	hect domain and RLD 6 [Source:MGI Symbol;Acc:MGI:1914388]	0.862925	5.48438	14.0738	0.000175772	0.00230097
782	ENSMUSG00000029816.10	ENSMUSG00000029816	Gpnmb	protein_coding	6	49036546	49070929	glycoprotein (transmembrane) nmb [Source:MGI Symbol;Acc:MGI:1934765]	1.8277	-0.625029	7.69628	0.00553348	0.0403585
783	ENSMUSG00000029924.12	ENSMUSG00000029924	Slc37a3	protein_coding	6	39334773	39377675	solute carrier family 37 (glycerol-3-phosphate transporter), member 3 [Source:MGI Symbol;Acc:MGI:1919394]	1.38778	3.813	11.2955	0.000776962	0.00820956
784	ENSMUSG00000029992.14	ENSMUSG00000029992	Gfpt1	protein_coding	6	87042846	87092197	glutamine fructose-6-phosphate transaminase 1 [Source:MGI Symbol;Acc:MGI:95698]	0.859746	6.63984	12.2092	0.000475549	0.00536893
785	ENSMUSG00000029993.16	ENSMUSG00000029993	Nfu1	protein_coding	6	87009236	87028461	NFU1 iron-sulfur cluster scaffold [Source:MGI Symbol;Acc:MGI:1913290]	-0.767641	5.1694	10.4964	0.0011961	0.0117765
786	ENSMUSG00000030048.5	ENSMUSG00000030048	Gkn3	protein_coding	6	87383256	87388935	gastrokine 3 [Source:MGI Symbol;Acc:MGI:1916138]	-2.09653	-1.1207	8.82056	0.00297855	0.024859
787	ENSMUSG00000030077.11	ENSMUSG00000030077	Chl1	protein_coding	6	103510586	103750211	cell adhesion molecule L1-like [Source:MGI Symbol;Acc:MGI:1098266]	1.89358	1.33827	9.40266	0.00216671	0.0192618
788	ENSMUSG00000030082.14	ENSMUSG00000030082	Sec61a1	protein_coding	6	88503579	88518905	Sec61 alpha 1 subunit (S. cerevisiae) [Source:MGI Symbol;Acc:MGI:1858417]	0.957893	7.765	13.0355	0.000305644	0.00369087
789	ENSMUSG00000030084.11	ENSMUSG00000030084	Plxna1	protein_coding	6	89316314	89362620	plexin A1 [Source:MGI Symbol;Acc:MGI:107685]	0.882119	4.4876	10.0087	0.00155804	0.014585
790	ENSMUSG00000030086.16	ENSMUSG00000030086	Chchd6	protein_coding	6	89383146	89595652	coiled-coil-helix-coiled-coil-helix domain containing 6 [Source:MGI Symbol;Acc:MGI:1913348]	-0.942334	4.03294	7.68461	0.00556938	0.0405009
791	ENSMUSG00000030088.15	ENSMUSG00000030088	Aldh1l1	protein_coding	6	90486427	90600203	aldehyde dehydrogenase 1 family, member L1 [Source:MGI Symbol;Acc:MGI:1340024]	-1.39351	3.82793	12.3852	0.000432746	0.00497156
792	ENSMUSG00000030103.11	ENSMUSG00000030103	Bhlhe40	protein_coding	6	108660629	108666925	basic helix-loop-helix family, member e40 [Source:MGI Symbol;Acc:MGI:1097714]	1.13841	6.2359	8.15663	0.0042904	0.0332279
793	ENSMUSG00000030104.9	ENSMUSG00000030104	Edem1	protein_coding	6	108828641	108859356	ER degradation enhancer, mannosidase alpha-like 1 [Source:MGI Symbol;Acc:MGI:2180139]	2.30282	8.52985	31.5276	1.96629e-08	6.66844e-07
794	ENSMUSG00000030134.11	ENSMUSG00000030134	Rasgef1a	protein_coding	6	118011438	118091546	RasGEF domain family, member 1A [Source:MGI Symbol;Acc:MGI:1917977]	2.48584	2.04099	11.0404	0.000891465	0.00922857
795	ENSMUSG00000030149.15	ENSMUSG00000030149	Klrk1	protein_coding	6	129610323	129623864	killer cell lectin-like receptor subfamily K, member 1 [Source:MGI Symbol;Acc:MGI:1196250]	3.39056	5.44147	62.58	2.55836e-15	2.36469e-13
796	ENSMUSG00000030154.10	ENSMUSG00000030154	Klrb1f	protein_coding	6	129045901	129057464	killer cell lectin-like receptor subfamily B member 1F [Source:MGI Symbol;Acc:MGI:2442965]	1.8114	3.83608	29.3206	6.13416e-08	1.89759e-06
797	ENSMUSG00000030165.16	ENSMUSG00000030165	Klrd1	protein_coding	6	129591782	129598775	killer cell lectin-like receptor, subfamily D, member 1 [Source:MGI Symbol;Acc:MGI:1196275]	2.97299	4.73057	59.2242	1.40691e-14	1.17918e-12
798	ENSMUSG00000030167.15	ENSMUSG00000030167	Klrc1	protein_coding	6	129666015	129678973	killer cell lectin-like receptor subfamily C, member 1 [Source:MGI Symbol;Acc:MGI:1336161]	3.31823	3.20734	48.9661	2.60426e-12	1.67248e-10
799	ENSMUSG00000030170.14	ENSMUSG00000030170	Wnt5b	protein_coding	6	119432531	119544347	wingless-type MMTV integration site family, member 5B [Source:MGI Symbol;Acc:MGI:98959]	1.49623	-0.0243854	7.3761	0.00660963	0.04646
800	ENSMUSG00000030173.15	ENSMUSG00000030173	Klra5	protein_coding	6	129898996	129917650	killer cell lectin-like receptor, subfamily A, member 5 [Source:MGI Symbol;Acc:MGI:101903]	7.10545	1.85736	92.3069	7.42236e-22	1.46814e-19
801	ENSMUSG00000030178.15	ENSMUSG00000030178	Klra13-ps	transcribed_unprocessed_pseudogene	6	130290878	130306428	killer cell lectin-like receptor subfamily A, member 13, pseudogene [Source:MGI Symbol;Acc:MGI:1321090]	4.4298	2.89445	65.9361	4.65792e-16	4.79863e-14
802	ENSMUSG00000030188.12	ENSMUSG00000030188	Magohb	protein_coding	6	131284388	131293244	mago homolog B, exon junction complex core component [Source:MGI Symbol;Acc:MGI:1913691]	-0.965505	3.36051	8.43829	0.00367401	0.0294368
803	ENSMUSG00000030247.9	ENSMUSG00000030247	Kcnj8	protein_coding	6	142564837	142571614	potassium inwardly-rectifying channel, subfamily J, member 8 [Source:MGI Symbol;Acc:MGI:1100508]	2.69545	-0.386154	10.0397	0.00153198	0.0143614
804	ENSMUSG00000030249.15	ENSMUSG00000030249	Abcc9	protein_coding	6	142587862	142702315	ATP-binding cassette, sub-family C (CFTR/MRP), member 9 [Source:MGI Symbol;Acc:MGI:1352630]	4.46137	-0.104402	16.8709	4.00107e-05	0.000635162
805	ENSMUSG00000030256.11	ENSMUSG00000030256	Bhlhe41	protein_coding	6	145858243	145865558	basic helix-loop-helix family, member e41 [Source:MGI Symbol;Acc:MGI:1930704]	3.83577	4.62873	31.9494	1.58245e-08	5.4531e-07
806	ENSMUSG00000030259.12	ENSMUSG00000030259	Rassf8	protein_coding	6	145746748	145821079	Ras association (RalGDS/AF-6) domain family (N-terminal) member 8 [Source:MGI Symbol;Acc:MGI:1918573]	1.04878	4.02578	8.97706	0.00273391	0.0231986
807	ENSMUSG00000030268.17	ENSMUSG00000030268	Bcat1	protein_coding	6	144993835	145076184	branched chain aminotransferase 1, cytosolic [Source:MGI Symbol;Acc:MGI:104861]	1.91123	2.64532	13.1634	0.000285478	0.00348565
808	ENSMUSG00000030283.7	ENSMUSG00000030283	St8sia1	protein_coding	6	142821545	142964452	ST8 alpha-N-acetyl-neuraminide alpha-2,8-sialyltransferase 1 [Source:MGI Symbol;Acc:MGI:106011]	1.11291	2.78216	7.32473	0.0068012	0.0474525
809	ENSMUSG00000030287.15	ENSMUSG00000030287	Itpr2	protein_coding	6	146108299	146502223	inositol 1,4,5-triphosphate receptor 2 [Source:MGI Symbol;Acc:MGI:99418]	0.744944	6.03644	8.38637	0.00378044	0.0300716
810	ENSMUSG00000030302.16	ENSMUSG00000030302	Atp2b2	protein_coding	6	113743831	114042613	ATPase, Ca++ transporting, plasma membrane 2 [Source:MGI Symbol;Acc:MGI:105368]	1.98232	-1.16849	7.57542	0.00591697	0.0426056
811	ENSMUSG00000030306.14	ENSMUSG00000030306	Tmtc1	protein_coding	6	148232430	148444389	transmembrane and tetratricopeptide repeat containing 1 [Source:MGI Symbol;Acc:MGI:3039590]	-1.45697	1.93864	9.32781	0.00225702	0.0198859
812	ENSMUSG00000030310.10	ENSMUSG00000030310	Slc6a1	protein_coding	6	114282635	114317532	solute carrier family 6 (neurotransmitter transporter, GABA), member 1 [Source:MGI Symbol;Acc:MGI:95627]	5.96722	-1.10357	30.144	4.01136e-08	1.28806e-06
813	ENSMUSG00000030313.15	ENSMUSG00000030313	Dennd5b	protein_coding	6	148988071	149101680	DENN/MADD domain containing 5B [Source:MGI Symbol;Acc:MGI:2444273]	1.98311	6.09519	32.5258	1.17621e-08	4.19197e-07
814	ENSMUSG00000030325.16	ENSMUSG00000030325	Klrb1c	protein_coding	6	128778485	128789215	killer cell lectin-like receptor subfamily B member 1C [Source:MGI Symbol;Acc:MGI:107538]	2.7392	4.49044	47.1275	6.65147e-12	4.04819e-10
815	ENSMUSG00000030329.11	ENSMUSG00000030329	Pianp	protein_coding	6	124996694	125003096	PILR alpha associated neural protein [Source:MGI Symbol;Acc:MGI:2441908]	4.58447	2.61859	88.0777	6.2932e-21	1.09192e-18
816	ENSMUSG00000030336.14	ENSMUSG00000030336	Cd27	protein_coding	6	125232622	125237010	CD27 antigen [Source:MGI Symbol;Acc:MGI:88326]	-0.817362	6.91077	10.8988	0.000962245	0.00984136
817	ENSMUSG00000030361.16	ENSMUSG00000030361	Klrb1a	protein_coding	6	128609227	128623533	killer cell lectin-like receptor subfamily B member 1A [Source:MGI Symbol;Acc:MGI:107540]	3.66657	1.8727	32.0837	1.47672e-08	5.15158e-07
818	ENSMUSG00000030365.11	ENSMUSG00000030365	Clec2i	protein_coding	6	128887588	128898167	C-type lectin domain family 2, member i [Source:MGI Symbol;Acc:MGI:2136650]	1.01952	5.07538	13.6812	0.000216611	0.00275535
819	ENSMUSG00000030409.15	ENSMUSG00000030409	Dmpk	protein_coding	7	19083849	19093821	dystrophia myotonica-protein kinase [Source:MGI Symbol;Acc:MGI:94906]	1.00703	3.21052	8.78794	0.00303228	0.0252329
820	ENSMUSG00000030423.7	ENSMUSG00000030423	Pop4	protein_coding	7	38261996	38271423	processing of precursor 4, ribonuclease P/MRP family, (S. cerevisiae) [Source:MGI Symbol;Acc:MGI:1913411]	-0.745206	4.96037	9.03387	0.00265023	0.022615
821	ENSMUSG00000030427.17	ENSMUSG00000030427	Lilra6	protein_coding	7	3908280	3915503	leukocyte immunoglobulin-like receptor, subfamily A (with TM domain), member 6 [Source:MGI Symbol;Acc:MGI:1195969]	2.25322	2.09222	9.24982	0.00235518	0.0206039
822	ENSMUSG00000030470.15	ENSMUSG00000030470	Csrp3	protein_coding	7	48830398	48848033	cysteine and glycine-rich protein 3 [Source:MGI Symbol;Acc:MGI:1330824]	2.72894	-0.0458466	20.9929	4.60988e-06	9.35888e-05
823	ENSMUSG00000030494.13	ENSMUSG00000030494	Rhpn2	protein_coding	7	35334170	35392289	rhophilin, Rho GTPase binding protein 2 [Source:MGI Symbol;Acc:MGI:1289234]	2.96148	2.60867	30.4649	3.39958e-08	1.10416e-06
824	ENSMUSG00000030505.17	ENSMUSG00000030505	Prmt3	protein_coding	7	49778346	49858265	protein arginine N-methyltransferase 3 [Source:MGI Symbol;Acc:MGI:1919224]	-0.59176	6.09323	8.12824	0.00435811	0.0335553
825	ENSMUSG00000030519.14	ENSMUSG00000030519	Apba2	protein_coding	7	64501706	64753878	amyloid beta (A4) precursor protein-binding, family A, member 2 [Source:MGI Symbol;Acc:MGI:1261791]	-2.67512	-2.2743	7.90553	0.00492839	0.0367862
826	ENSMUSG00000030532.6	ENSMUSG00000030532	Hddc3	protein_coding	7	80343104	80350547	HD domain containing 3 [Source:MGI Symbol;Acc:MGI:1915945]	1.48562	2.2708	17.6386	2.67118e-05	0.000445121
827	ENSMUSG00000030539.13	ENSMUSG00000030539	Sema4b	protein_coding	7	80186841	80226527	sema domain, immunoglobulin domain (Ig), transmembrane domain (TM) and short cytoplasmic domain, (semaphorin) 4B [Source:MGI Symbol;Acc:MGI:107559]	1.00091	5.62326	20.1786	7.05394e-06	0.000137601
828	ENSMUSG00000030555.16	ENSMUSG00000030555	Ttc23	protein_coding	7	67647410	67762912	tetratricopeptide repeat domain 23 [Source:MGI Symbol;Acc:MGI:1914259]	1.15587	2.23294	7.42552	0.00643051	0.0454595
829	ENSMUSG00000030605.15	ENSMUSG00000030605	Mfge8	protein_coding	7	79133768	79149060	milk fat globule-EGF factor 8 protein [Source:MGI Symbol;Acc:MGI:102768]	-0.877909	5.85715	11.1673	0.000832539	0.00871433
830	ENSMUSG00000030616.15	ENSMUSG00000030616	Sytl2	protein_coding	7	90302252	90410719	synaptotagmin-like 2 [Source:MGI Symbol;Acc:MGI:1933366]	2.47276	3.10362	36.7111	1.36995e-09	5.75323e-08
831	ENSMUSG00000030638.13	ENSMUSG00000030638	Sh3gl3	protein_coding	7	82173840	82307419	SH3-domain GRB2-like 3 [Source:MGI Symbol;Acc:MGI:700011]	1.52183	-0.539374	7.44624	0.00635691	0.0450196
832	ENSMUSG00000030643.14	ENSMUSG00000030643	Rab30	protein_coding	7	92741603	92844535	RAB30, member RAS oncogene family [Source:MGI Symbol;Acc:MGI:1923235]	3.28637	3.93491	27.0398	1.99306e-07	5.63183e-06
833	ENSMUSG00000030651.5	ENSMUSG00000030651	Art2b	protein_coding	7	101576970	101585600	ADP-ribosyltransferase 2b [Source:MGI Symbol;Acc:MGI:107545]	-3.08948	0.483636	27.1296	1.90263e-07	5.41495e-06
834	ENSMUSG00000030670.16	ENSMUSG00000030670	Cyp2r1	protein_coding	7	114549682	114562972	cytochrome P450, family 2, subfamily r, polypeptide 1 [Source:MGI Symbol;Acc:MGI:2449771]	-1.47053	1.46228	13.4009	0.000251499	0.00314056
835	ENSMUSG00000030671.9	ENSMUSG00000030671	Pde3b	protein_coding	7	114415281	114539251	phosphodiesterase 3B, cGMP-inhibited [Source:MGI Symbol;Acc:MGI:1333863]	0.86549	5.8292	11.9348	0.000550951	0.00611206
836	ENSMUSG00000030691.15	ENSMUSG00000030691	Fchsd2	protein_coding	7	101092863	101284405	FCH and double SH3 domains 2 [Source:MGI Symbol;Acc:MGI:2448475]	-0.919649	6.90046	17.2233	3.32328e-05	0.000539512
837	ENSMUSG00000030706.17	ENSMUSG00000030706	Mrpl48	protein_coding	7	100545751	100608301	mitochondrial ribosomal protein L48 [Source:MGI Symbol;Acc:MGI:1289321]	-0.895026	4.52914	10.4744	0.00121043	0.0118762
838	ENSMUSG00000030739.18	ENSMUSG00000030739	Myh14	protein_coding	7	44605803	44670843	myosin, heavy polypeptide 14 [Source:MGI Symbol;Acc:MGI:1919210]	1.83785	1.95147	14.8681	0.000115293	0.00160035
839	ENSMUSG00000030750.13	ENSMUSG00000030750	Nsmce1	protein_coding	7	125467640	125491596	NSE1 homolog, SMC5-SMC6 complex component [Source:MGI Symbol;Acc:MGI:1914961]	-0.795438	5.35021	9.94235	0.0016152	0.0150559
840	ENSMUSG00000030789.9	ENSMUSG00000030789	Itgax	protein_coding	7	128129547	128150657	integrin alpha X [Source:MGI Symbol;Acc:MGI:96609]	1.59313	4.99347	18.2871	1.89992e-05	0.000330813
841	ENSMUSG00000030792.8	ENSMUSG00000030792	Dkkl1	protein_coding	7	45207519	45212147	dickkopf-like 1 [Source:MGI Symbol;Acc:MGI:1354963]	-1.14344	4.12415	9.57836	0.00196884	0.0177988
842	ENSMUSG00000030793.4	ENSMUSG00000030793	Pycard	protein_coding	7	127989708	127993867	PYD and CARD domain containing [Source:MGI Symbol;Acc:MGI:1931465]	-1.7755	4.23302	38.6309	5.12019e-10	2.32287e-08
843	ENSMUSG00000030825.19	ENSMUSG00000030825	Hsd17b14	protein_coding	7	45554893	45567752	hydroxysteroid (17-beta) dehydrogenase 14 [Source:MGI Symbol;Acc:MGI:1913315]	1.64586	-0.0356291	11.1345	0.000847385	0.00883567
844	ENSMUSG00000030827.5	ENSMUSG00000030827	Fgf21	protein_coding	7	45613886	45615490	fibroblast growth factor 21 [Source:MGI Symbol;Acc:MGI:1861377]	4.43807	-0.951576	23.4371	1.29066e-06	3.05374e-05
845	ENSMUSG00000030830.18	ENSMUSG00000030830	Itgal	protein_coding	7	127296260	127335138	integrin alpha L [Source:MGI Symbol;Acc:MGI:96606]	1.35116	8.00308	19.2046	1.1743e-05	0.00021547
846	ENSMUSG00000031074.14	ENSMUSG00000031074	Fgf3	protein_coding	7	144838083	144844436	fibroblast growth factor 3 [Source:MGI Symbol;Acc:MGI:95517]	-1.79453	2.78178	22.3189	2.30921e-06	5.11093e-05
847	ENSMUSG00000031119.4	ENSMUSG00000031119	Gpc4	protein_coding	X	52053021	52165252	glypican 4 [Source:MGI Symbol;Acc:MGI:104902]	1.71521	0.172117	7.69342	0.00554225	0.0404076
848	ENSMUSG00000031138.4	ENSMUSG00000031138	F9	protein_coding	X	59999464	60030759	coagulation factor IX [Source:MGI Symbol;Acc:MGI:88384]	3.42127	0.069109	32.6005	1.13187e-08	4.04855e-07
849	ENSMUSG00000031139.15	ENSMUSG00000031139	Mcf2	protein_coding	X	60055956	60179089	mcf.2 transforming sequence [Source:MGI Symbol;Acc:MGI:96932]	-2.22376	0.936283	16.9324	3.87351e-05	0.000617887
850	ENSMUSG00000031202.5	ENSMUSG00000031202	Rab39b	protein_coding	X	75572046	75578231	RAB39B, member RAS oncogene family [Source:MGI Symbol;Acc:MGI:1915040]	2.00522	1.07736	20.7608	5.20381e-06	0.000103657
851	ENSMUSG00000031257.14	ENSMUSG00000031257	Nox1	protein_coding	X	134086421	134221956	NADPH oxidase 1 [Source:MGI Symbol;Acc:MGI:2450016]	3.91954	3.97889	69.3218	8.36394e-17	9.45365e-15
852	ENSMUSG00000031258.4	ENSMUSG00000031258	Xkrx	protein_coding	X	134149043	134162076	X-linked Kx blood group related, X-linked [Source:MGI Symbol;Acc:MGI:3584011]	1.93749	3.45857	23.4317	1.29425e-06	3.05857e-05
853	ENSMUSG00000031297.14	ENSMUSG00000031297	Slc7a3	protein_coding	X	101079210	101086020	solute carrier family 7 (cationic amino acid transporter, y+ system), member 3 [Source:MGI Symbol;Acc:MGI:1100521]	2.35056	-0.180222	13.8174	0.000201459	0.00259262
854	ENSMUSG00000031375.17	ENSMUSG00000031375	Bgn	protein_coding	X	73483602	73495933	biglycan [Source:MGI Symbol;Acc:MGI:88158]	1.03592	4.07419	10.4156	0.00124953	0.0121834
855	ENSMUSG00000031391.18	ENSMUSG00000031391	L1cam	protein_coding	X	73853778	73896105	L1 cell adhesion molecule [Source:MGI Symbol;Acc:MGI:96721]	1.43673	2.81362	7.88945	0.00497239	0.0370448
856	ENSMUSG00000031428.11	ENSMUSG00000031428	Zcchc18	protein_coding	X	136993155	136998472	zinc finger, CCHC domain containing 18 [Source:MGI Symbol;Acc:MGI:1914245]	1.53034	4.16347	21.4629	3.60745e-06	7.519e-05
857	ENSMUSG00000031431.13	ENSMUSG00000031431	Tsc22d3	protein_coding	X	140539528	140600659	TSC22 domain family, member 3 [Source:MGI Symbol;Acc:MGI:1196284]	0.788824	6.58777	8.70085	0.00318062	0.0262245
858	ENSMUSG00000031441.15	ENSMUSG00000031441	Atp11a	protein_coding	8	12757014	12868728	ATPase, class VI, type 11A [Source:MGI Symbol;Acc:MGI:1354735]	0.842988	5.96607	10.9347	0.000943813	0.00968792
859	ENSMUSG00000031442.20	ENSMUSG00000031442	Mcf2l	protein_coding	8	12873806	13020905	mcf.2 transforming sequence-like [Source:MGI Symbol;Acc:MGI:103263]	1.79877	4.00289	33.1349	8.59836e-09	3.12065e-07
860	ENSMUSG00000031444.16	ENSMUSG00000031444	F10	protein_coding	8	13037308	13056676	coagulation factor X [Source:MGI Symbol;Acc:MGI:103107]	2.55007	2.55373	12.2318	0.000469818	0.00531332
861	ENSMUSG00000031448.12	ENSMUSG00000031448	Adprhl1	protein_coding	8	13221663	13254162	ADP-ribosylhydrolase like 1 [Source:MGI Symbol;Acc:MGI:2442168]	3.08958	0.44438	17.8596	2.37815e-05	0.000402049
862	ENSMUSG00000031461.4	ENSMUSG00000031461	Myom2	protein_coding	8	15057653	15133541	myomesin 2 [Source:MGI Symbol;Acc:MGI:1328358]	2.42804	-1.36357	10.248	0.00136836	0.0131071
863	ENSMUSG00000031465.6	ENSMUSG00000031465	Angpt2	protein_coding	8	18690263	18741562	angiopoietin 2 [Source:MGI Symbol;Acc:MGI:1202890]	4.30852	3.24429	72.3254	1.8248e-17	2.22806e-15
864	ENSMUSG00000031467.10	ENSMUSG00000031467	Agpat5	protein_coding	8	18846277	18891361	1-acylglycerol-3-phosphate O-acyltransferase 5 (lysophosphatidic acid acyltransferase, epsilon) [Source:MGI Symbol;Acc:MGI:1196345]	0.658257	6.18062	10.2678	0.00135369	0.0130107
865	ENSMUSG00000031486.15	ENSMUSG00000031486	Adgra2	protein_coding	8	27085583	27123436	adhesion G protein-coupled receptor A2 [Source:MGI Symbol;Acc:MGI:1925810]	2.32784	2.88935	42.9149	5.7175e-11	2.96053e-09
866	ENSMUSG00000031488.14	ENSMUSG00000031488	Rab11fip1	protein_coding	8	27138773	27174646	RAB11 family interacting protein 1 (class I) [Source:MGI Symbol;Acc:MGI:1923017]	0.871185	4.95069	10.9327	0.000944793	0.00969295
867	ENSMUSG00000031493.10	ENSMUSG00000031493	Ggn	protein_coding	7	29170210	29173976	gametogenetin [Source:MGI Symbol;Acc:MGI:2181461]	-1.06792	1.70204	8.02673	0.00460919	0.0349042
868	ENSMUSG00000031502.11	ENSMUSG00000031502	Col4a1	protein_coding	8	11198423	11312826	collagen, type IV, alpha 1 [Source:MGI Symbol;Acc:MGI:88454]	-1.66749	4.7589	22.3873	2.2284e-06	4.97491e-05
869	ENSMUSG00000031503.13	ENSMUSG00000031503	Col4a2	protein_coding	8	11312805	11449287	collagen, type IV, alpha 2 [Source:MGI Symbol;Acc:MGI:88455]	-1.45994	4.76567	22.6352	1.95865e-06	4.467e-05
870	ENSMUSG00000031517.8	ENSMUSG00000031517	Gpm6a	protein_coding	8	54954843	55060871	glycoprotein m6a [Source:MGI Symbol;Acc:MGI:107671]	4.6154	3.55687	33.9433	5.67405e-09	2.12562e-07
871	ENSMUSG00000031543.18	ENSMUSG00000031543	Ank1	protein_coding	8	22974844	23150497	ankyrin 1, erythroid [Source:MGI Symbol;Acc:MGI:88024]	1.60825	4.36396	8.56331	0.00343005	0.0278773
872	ENSMUSG00000031554.18	ENSMUSG00000031554	Adam5	protein_coding	8	24727093	24824369	a disintegrin and metallopeptidase domain 5 [Source:MGI Symbol;Acc:MGI:104730]	-2.23632	-1.22322	9.9201	0.00163483	0.0152031
873	ENSMUSG00000031558.15	ENSMUSG00000031558	Slit2	protein_coding	5	47983138	48307733	slit guidance ligand 2 [Source:MGI Symbol;Acc:MGI:1315205]	-1.60277	-0.496328	8.65883	0.00325479	0.0267358
874	ENSMUSG00000031570.17	ENSMUSG00000031570	Plpp5	protein_coding	8	25720037	25724887	phospholipid phosphatase 5 [Source:MGI Symbol;Acc:MGI:1919160]	1.1415	5.70365	18.537	1.66635e-05	0.000294815
875	ENSMUSG00000031586.17	ENSMUSG00000031586	Rbpms	protein_coding	8	33782643	33929863	RNA binding protein gene with multiple splicing [Source:MGI Symbol;Acc:MGI:1334446]	-0.934124	5.81547	15.2635	9.35047e-05	0.00133829
876	ENSMUSG00000031595.9	ENSMUSG00000031595	Pdgfrl	protein_coding	8	40926212	40990785	platelet-derived growth factor receptor-like [Source:MGI Symbol;Acc:MGI:1916047]	1.69037	-1.53674	7.73961	0.00540223	0.0396351
877	ENSMUSG00000031600.10	ENSMUSG00000031600	Vps37a	protein_coding	8	40511783	40551134	vacuolar protein sorting 37A [Source:MGI Symbol;Acc:MGI:1261835]	1.04149	5.37594	18.6383	1.58012e-05	0.000280831
878	ENSMUSG00000031636.7	ENSMUSG00000031636	Pdlim3	protein_coding	8	45885461	45919548	PDZ and LIM domain 3 [Source:MGI Symbol;Acc:MGI:1859274]	2.8647	-2.18139	12.2103	0.000475258	0.00536871
879	ENSMUSG00000031667.16	ENSMUSG00000031667	Aktip	protein_coding	8	91111784	91199976	thymoma viral proto-oncogene 1 interacting protein [Source:MGI Symbol;Acc:MGI:3693832]	0.77595	4.56979	7.73206	0.00542489	0.0397718
880	ENSMUSG00000031668.14	ENSMUSG00000031668	Eif2ak3	protein_coding	6	70844515	70905245	eukaryotic translation initiation factor 2 alpha kinase 3 [Source:MGI Symbol;Acc:MGI:1341830]	1.14973	6.04316	19.0498	1.27351e-05	0.000232166
881	ENSMUSG00000031673.6	ENSMUSG00000031673	Cdh11	protein_coding	8	102632095	102785642	cadherin 11 [Source:MGI Symbol;Acc:MGI:99217]	1.86603	0.975174	16.6502	4.49446e-05	0.000706119
882	ENSMUSG00000031697.12	ENSMUSG00000031697	Orc6	protein_coding	8	85299632	85308278	origin recognition complex, subunit 6 [Source:MGI Symbol;Acc:MGI:1929285]	-0.600493	5.4146	7.48066	0.00623653	0.0443576
883	ENSMUSG00000031698.14	ENSMUSG00000031698	Mylk3	protein_coding	8	85324303	85386345	myosin light chain kinase 3 [Source:MGI Symbol;Acc:MGI:2443063]	1.34917	1.59003	7.34393	0.00672895	0.0471367
884	ENSMUSG00000031712.10	ENSMUSG00000031712	Il15	protein_coding	8	82331632	82403222	interleukin 15 [Source:MGI Symbol;Acc:MGI:103014]	-1.3504	4.42407	20.3414	6.47837e-06	0.000127251
885	ENSMUSG00000031736.11	ENSMUSG00000031736	Crnde	processed_transcript	8	92326033	92356120	colorectal neoplasia differentially expressed (non-protein coding) [Source:MGI Symbol;Acc:MGI:1918546]	-1.47876	0.0952932	11.6008	0.000659217	0.0071684
886	ENSMUSG00000031756.5	ENSMUSG00000031756	Cenpn	protein_coding	8	116921730	116941507	centromere protein N [Source:MGI Symbol;Acc:MGI:1919405]	-0.699363	4.93849	8.90522	0.00284356	0.0239547
887	ENSMUSG00000031762.7	ENSMUSG00000031762	Mt2	protein_coding	8	94172664	94173568	metallothionein 2 [Source:MGI Symbol;Acc:MGI:97172]	2.22376	1.73193	10.111	0.0014739	0.0138959
888	ENSMUSG00000031765.8	ENSMUSG00000031765	Mt1	protein_coding	8	94179082	94180327	metallothionein 1 [Source:MGI Symbol;Acc:MGI:97171]	1.86348	4.89349	15.3492	8.93579e-05	0.00128452
889	ENSMUSG00000031767.13	ENSMUSG00000031767	Nudt7	protein_coding	8	114133557	114154739	nudix (nucleoside diphosphate linked moiety X)-type motif 7 [Source:MGI Symbol;Acc:MGI:1914778]	-1.13188	3.66174	14.5389	0.000137297	0.00185249
890	ENSMUSG00000031770.16	ENSMUSG00000031770	Herpud1	protein_coding	8	94386438	94395377	homocysteine-inducible, endoplasmic reticulum stress-inducible, ubiquitin-like domain member 1 [Source:MGI Symbol;Acc:MGI:1927406]	1.54698	7.95581	14.6727	0.000127882	0.00174449
891	ENSMUSG00000031781.14	ENSMUSG00000031781	Ciapin1	protein_coding	8	94819804	94838358	cytokine induced apoptosis inhibitor 1 [Source:MGI Symbol;Acc:MGI:1922083]	0.58029	5.78663	7.86267	0.00504659	0.0374706
892	ENSMUSG00000031786.7	ENSMUSG00000031786	Drc7	protein_coding	8	95055103	95078141	dynein regulatory complex subunit 7 [Source:MGI Symbol;Acc:MGI:2685616]	-2.0869	4.86827	33.9706	5.59512e-09	2.10402e-07
893	ENSMUSG00000031788.14	ENSMUSG00000031788	Kifc3	protein_coding	8	95099828	95202812	kinesin family member C3 [Source:MGI Symbol;Acc:MGI:109202]	2.14303	2.68451	38.9706	4.3023e-10	1.96989e-08
894	ENSMUSG00000031789.17	ENSMUSG00000031789	Cngb1	protein_coding	8	95239045	95306585	cyclic nucleotide gated channel beta 1 [Source:MGI Symbol;Acc:MGI:2664102]	-1.23112	3.24749	13.2793	0.000268346	0.00331329
895	ENSMUSG00000031803.8	ENSMUSG00000031803	B3gnt3	protein_coding	8	71690756	71701789	UDP-GlcNAc:betaGal beta-1,3-N-acetylglucosaminyltransferase 3 [Source:MGI Symbol;Acc:MGI:2152535]	-1.53523	2.04366	17.375	3.0684e-05	0.000501181
896	ENSMUSG00000031824.15	ENSMUSG00000031824	6430548M08Rik	protein_coding	8	120114152	120165306	RIKEN cDNA 6430548M08 gene [Source:MGI Symbol;Acc:MGI:2443793]	2.01187	4.53476	8.46814	0.00361421	0.0290749
897	ENSMUSG00000031840.12	ENSMUSG00000031840	Rab3a	protein_coding	8	70754679	70758677	RAB3A, member RAS oncogene family [Source:MGI Symbol;Acc:MGI:97843]	1.10516	3.39699	12.2864	0.000456269	0.00519873
898	ENSMUSG00000031848.15	ENSMUSG00000031848	Lsm4	protein_coding	8	70673248	70678752	LSM4 homolog, U6 small nuclear RNA and mRNA degradation associated [Source:MGI Symbol;Acc:MGI:1354692]	-1.02184	5.9901	14.1992	0.000164439	0.00216984
899	ENSMUSG00000031849.9	ENSMUSG00000031849	Comp	protein_coding	8	70373558	70382066	cartilage oligomeric matrix protein [Source:MGI Symbol;Acc:MGI:88469]	-2.0871	-0.160998	12.811	0.000344587	0.00410351
900	ENSMUSG00000031851.14	ENSMUSG00000031851	Ntpcr	protein_coding	8	125729963	125748235	nucleoside-triphosphatase, cancer-related [Source:MGI Symbol;Acc:MGI:1913816]	-0.745588	4.77052	8.29619	0.00397284	0.0312456
901	ENSMUSG00000031860.17	ENSMUSG00000031860	Pbx4	protein_coding	8	69832491	69872292	pre B cell leukemia homeobox 4 [Source:MGI Symbol;Acc:MGI:1931321]	-3.16296	4.00138	97.5733	5.18995e-23	1.14064e-20
902	ENSMUSG00000031861.15	ENSMUSG00000031861	Lpar2	protein_coding	8	69822429	69831102	lysophosphatidic acid receptor 2 [Source:MGI Symbol;Acc:MGI:1858422]	-0.910082	3.90415	11.1477	0.000841349	0.008782
903	ENSMUSG00000031871.9	ENSMUSG00000031871	Cdh5	protein_coding	8	104101625	104144511	cadherin 5 [Source:MGI Symbol;Acc:MGI:105057]	2.55392	1.86496	18.4817	1.71542e-05	0.000302955
904	ENSMUSG00000031877.9	ENSMUSG00000031877	Ces2g	protein_coding	8	104961718	104969537	carboxylesterase 2G [Source:MGI Symbol;Acc:MGI:1919611]	1.31558	4.61253	15.9124	6.63438e-05	0.000988163
905	ENSMUSG00000031933.17	ENSMUSG00000031933	Izumo1r	protein_coding	9	14885814	14903949	IZUMO1 receptor, JUNO [Source:MGI Symbol;Acc:MGI:1929185]	2.30463	0.613117	12.5739	0.000391163	0.00456203
906	ENSMUSG00000031955.10	ENSMUSG00000031955	Bcar1	protein_coding	8	111710474	111743809	breast cancer anti-estrogen resistance 1 [Source:MGI Symbol;Acc:MGI:108091]	3.19912	0.311238	22.5816	2.01401e-06	4.56847e-05
907	ENSMUSG00000032021.14	ENSMUSG00000032021	Crtam	protein_coding	9	40969691	41004628	cytotoxic and regulatory T cell molecule [Source:MGI Symbol;Acc:MGI:1859822]	4.51047	2.83502	58.9476	1.61928e-14	1.35145e-12
908	ENSMUSG00000032023.7	ENSMUSG00000032023	Jhy	protein_coding	9	40894849	40964118	junctional cadherin complex regulator [Source:MGI Symbol;Acc:MGI:1918239]	4.31946	-1.21972	22.9477	1.66469e-06	3.85569e-05
909	ENSMUSG00000032026.7	ENSMUSG00000032026	Rexo2	protein_coding	9	48468512	48480623	RNA exonuclease 2 [Source:MGI Symbol;Acc:MGI:1888981]	1.29336	7.00727	15.0118	0.000106843	0.00150097
910	ENSMUSG00000032035.15	ENSMUSG00000032035	Ets1	protein_coding	9	32636221	32757820	E26 avian leukemia oncogene 1, 5' domain [Source:MGI Symbol;Acc:MGI:95455]	1.13335	7.21324	13.6056	0.000225517	0.00285578
911	ENSMUSG00000032041.15	ENSMUSG00000032041	Tirap	protein_coding	9	35184551	35200291	toll-interleukin 1 receptor (TIR) domain-containing adaptor protein [Source:MGI Symbol;Acc:MGI:2152213]	1.37947	4.11043	18.3735	1.81568e-05	0.000317825
912	ENSMUSG00000032042.11	ENSMUSG00000032042	Srpr	protein_coding	9	35200175	35247973	signal recognition particle receptor ('docking protein') [Source:MGI Symbol;Acc:MGI:1914648]	1.05341	7.52319	15.3409	8.97539e-05	0.0012874
913	ENSMUSG00000032053.8	ENSMUSG00000032053	Pou2af1	protein_coding	9	51213708	51240080	POU domain, class 2, associating factor 1 [Source:MGI Symbol;Acc:MGI:105086]	3.92166	8.13448	40.4377	2.0299e-10	9.74548e-09
914	ENSMUSG00000032076.19	ENSMUSG00000032076	Cadm1	protein_coding	9	47530173	47857637	cell adhesion molecule 1 [Source:MGI Symbol;Acc:MGI:1889272]	2.74934	1.95307	28.4893	9.42167e-08	2.81655e-06
915	ENSMUSG00000032089.16	ENSMUSG00000032089	Il10ra	protein_coding	9	45253837	45269149	interleukin 10 receptor, alpha [Source:MGI Symbol;Acc:MGI:96538]	0.88038	5.34947	9.98261	0.00158026	0.014765
916	ENSMUSG00000032093.7	ENSMUSG00000032093	Cd3e	protein_coding	9	44998740	45009627	CD3 antigen, epsilon polypeptide [Source:MGI Symbol;Acc:MGI:88332]	2.4088	2.39018	14.9459	0.00011064	0.00154516
917	ENSMUSG00000032094.8	ENSMUSG00000032094	Cd3d	protein_coding	9	44981786	44987339	CD3 antigen, delta polypeptide [Source:MGI Symbol;Acc:MGI:88331]	2.10479	2.62577	10.8595	0.00098289	0.0100008
918	ENSMUSG00000032115.14	ENSMUSG00000032115	Hyou1	protein_coding	9	44379490	44392369	hypoxia up-regulated 1 [Source:MGI Symbol;Acc:MGI:108030]	1.58377	8.1929	22.0096	2.71286e-06	5.85172e-05
919	ENSMUSG00000032120.11	ENSMUSG00000032120	C2cd2l	protein_coding	9	44309237	44320285	C2 calcium-dependent domain containing 2-like [Source:MGI Symbol;Acc:MGI:1919014]	1.01679	4.84912	16.8082	4.13537e-05	0.00065438
920	ENSMUSG00000032131.16	ENSMUSG00000032131	Abcg4	protein_coding	9	44273188	44288615	ATP binding cassette subfamily G member 4 [Source:MGI Symbol;Acc:MGI:1890594]	1.82285	2.34734	8.56238	0.00343181	0.0278773
921	ENSMUSG00000032182.15	ENSMUSG00000032182	Yipf2	protein_coding	9	21588682	21592828	Yip1 domain family, member 2 [Source:MGI Symbol;Acc:MGI:1922016]	0.841529	4.26252	10.1985	0.00140557	0.0133922
922	ENSMUSG00000032193.9	ENSMUSG00000032193	Ldlr	protein_coding	9	21723483	21749919	low density lipoprotein receptor [Source:MGI Symbol;Acc:MGI:96765]	-1.52489	5.4521	35.4579	2.60629e-09	1.04569e-07
923	ENSMUSG00000032207.10	ENSMUSG00000032207	Lipc	protein_coding	9	70798128	70952226	lipase, hepatic [Source:MGI Symbol;Acc:MGI:96216]	1.95236	1.51027	8.40714	0.0037375	0.0298652
924	ENSMUSG00000032218.7	ENSMUSG00000032218	Ccnb2	protein_coding	9	70407692	70421547	cyclin B2 [Source:MGI Symbol;Acc:MGI:88311]	-0.813379	5.96989	10.5174	0.00118253	0.0116661
925	ENSMUSG00000032221.14	ENSMUSG00000032221	Mns1	protein_coding	9	72438011	72462025	meiosis-specific nuclear structural protein 1 [Source:MGI Symbol;Acc:MGI:107933]	-0.81499	4.72824	10.3273	0.0013108	0.0127034
926	ENSMUSG00000032239.10	ENSMUSG00000032239	Rp9	protein_coding	9	22411047	22469743	retinitis pigmentosa 9 (human) [Source:MGI Symbol;Acc:MGI:2157166]	-0.732191	5.79912	8.9763	0.00273504	0.0231986
927	ENSMUSG00000032278.11	ENSMUSG00000032278	Paqr5	protein_coding	9	61953481	62026856	progestin and adipoQ receptor family member V [Source:MGI Symbol;Acc:MGI:1921340]	-1.78872	4.04451	25.8789	3.63513e-07	9.58706e-06
928	ENSMUSG00000032323.13	ENSMUSG00000032323	Cyp11a1	protein_coding	9	58006411	58027023	cytochrome P450, family 11, subfamily a, polypeptide 1 [Source:MGI Symbol;Acc:MGI:88582]	2.14307	2.58283	33.5952	6.78591e-09	2.51358e-07
929	ENSMUSG00000032332.17	ENSMUSG00000032332	Col12a1	protein_coding	9	79598991	79718831	collagen, type XII, alpha 1 [Source:MGI Symbol;Acc:MGI:88448]	2.47053	-2.33233	7.67517	0.00559858	0.0406833
930	ENSMUSG00000032336.17	ENSMUSG00000032336	Nptn	protein_coding	9	58582240	58657955	neuroplastin [Source:MGI Symbol;Acc:MGI:108077]	0.713296	6.02132	10.1497	0.00144321	0.0136783
931	ENSMUSG00000032340.8	ENSMUSG00000032340	Neo1	protein_coding	9	58874687	59036441	neogenin [Source:MGI Symbol;Acc:MGI:1097159]	1.42217	3.10259	14.5842	0.000134032	0.0018193
932	ENSMUSG00000032352.16	ENSMUSG00000032352	Lrrc1	protein_coding	9	77430823	77544870	leucine rich repeat containing 1 [Source:MGI Symbol;Acc:MGI:2442313]	-1.11282	4.7252	22.4278	2.18194e-06	4.89884e-05
933	ENSMUSG00000032380.8	ENSMUSG00000032380	Dapk2	protein_coding	9	66158223	66272242	death-associated protein kinase 2 [Source:MGI Symbol;Acc:MGI:1341297]	2.00363	2.02583	11.1544	0.000838334	0.00875515
934	ENSMUSG00000032413.12	ENSMUSG00000032413	Rasa2	protein_coding	9	96539300	96631617	RAS p21 protein activator 2 [Source:MGI Symbol;Acc:MGI:2149960]	0.692842	5.4314	7.94588	0.0048197	0.0361935
935	ENSMUSG00000032425.15	ENSMUSG00000032425	Zfp949	protein_coding	9	88548020	88571061	zinc finger protein 949 [Source:MGI Symbol;Acc:MGI:1918890]	1.9869	5.45894	83.0309	8.07793e-20	1.25812e-17
936	ENSMUSG00000032436.17	ENSMUSG00000032436	Cmtm7	protein_coding	9	114756836	114781856	CKLF-like MARVEL transmembrane domain containing 7 [Source:MGI Symbol;Acc:MGI:2447166]	-0.967137	8.14665	8.43236	0.00368601	0.029506
937	ENSMUSG00000032446.14	ENSMUSG00000032446	Eomes	protein_coding	9	118478212	118486132	eomesodermin [Source:MGI Symbol;Acc:MGI:1201683]	4.84863	4.17094	117.637	2.08213e-27	6.24007e-25
938	ENSMUSG00000032456.13	ENSMUSG00000032456	Nmnat3	protein_coding	9	98287435	98420438	nicotinamide nucleotide adenylyltransferase 3 [Source:MGI Symbol;Acc:MGI:1921330]	-1.19856	4.0493	16.4806	4.91492e-05	0.000762487
939	ENSMUSG00000032492.14	ENSMUSG00000032492	Pth1r	protein_coding	9	110722085	110747145	parathyroid hormone 1 receptor [Source:MGI Symbol;Acc:MGI:97801]	-1.36185	-0.622477	8.04002	0.0045755	0.0347208
940	ENSMUSG00000032501.9	ENSMUSG00000032501	Trib1	protein_coding	15	59648350	59657099	tribbles pseudokinase 1 [Source:MGI Symbol;Acc:MGI:2443397]	1.52038	7.04781	15.4809	8.33454e-05	0.00121129
941	ENSMUSG00000032503.18	ENSMUSG00000032503	Arpp21	protein_coding	9	112065091	112235938	cyclic AMP-regulated phosphoprotein, 21 [Source:MGI Symbol;Acc:MGI:107562]	-1.25207	5.23234	9.42924	0.00213552	0.0190273
942	ENSMUSG00000032547.12	ENSMUSG00000032547	Ryk	protein_coding	9	102834917	102908305	receptor-like tyrosine kinase [Source:MGI Symbol;Acc:MGI:101766]	0.972198	4.31094	9.79367	0.00175113	0.0161329
943	ENSMUSG00000032549.7	ENSMUSG00000032549	Rab6b	protein_coding	9	103111787	103185276	RAB6B, member RAS oncogene family [Source:MGI Symbol;Acc:MGI:107283]	-3.76658	3.59645	115.723	5.46628e-27	1.567e-24
944	ENSMUSG00000032557.13	ENSMUSG00000032557	Uba5	protein_coding	9	104046599	104063134	ubiquitin-like modifier activating enzyme 5 [Source:MGI Symbol;Acc:MGI:1913913]	1.04879	6.42106	18.7905	1.45896e-05	0.000262651
945	ENSMUSG00000032561.15	ENSMUSG00000032561	Acpp	protein_coding	9	104288251	104337748	acid phosphatase, prostate [Source:MGI Symbol;Acc:MGI:1928480]	2.34524	4.58699	31.4837	2.01118e-08	6.78859e-07
946	ENSMUSG00000032564.16	ENSMUSG00000032564	Cpne4	protein_coding	9	104547286	105034544	copine IV [Source:MGI Symbol;Acc:MGI:1921270]	6.37005	-1.55987	22.8619	1.74065e-06	4.0061e-05
947	ENSMUSG00000032572.9	ENSMUSG00000032572	Col6a4	protein_coding	9	105989454	106096783	collagen, type VI, alpha 4 [Source:MGI Symbol;Acc:MGI:1915803]	5.70759	0.168682	57.6404	3.14695e-14	2.53036e-12
948	ENSMUSG00000032575.16	ENSMUSG00000032575	Manf	protein_coding	9	106838312	106891979	mesencephalic astrocyte-derived neurotrophic factor [Source:MGI Symbol;Acc:MGI:1922090]	0.991332	6.94728	8.48385	0.00358314	0.0289048
949	ENSMUSG00000032601.13	ENSMUSG00000032601	Prkar2a	protein_coding	9	108689314	108750436	protein kinase, cAMP dependent regulatory, type II alpha [Source:MGI Symbol;Acc:MGI:108025]	0.777613	5.29813	11.6718	0.000634529	0.00692659
950	ENSMUSG00000032625.14	ENSMUSG00000032625	Thsd7a	protein_coding	6	12311610	12749410	thrombospondin, type I, domain containing 7A [Source:MGI Symbol;Acc:MGI:2685683]	2.87375	-2.51674	8.43811	0.00367439	0.0294368
951	ENSMUSG00000032649.14	ENSMUSG00000032649	Colgalt2	protein_coding	1	152399830	152510695	collagen beta(1-O)galactosyltransferase 2 [Source:MGI Symbol;Acc:MGI:2138232]	-2.62569	-0.354482	12.0689	0.000512703	0.00574251
952	ENSMUSG00000032652.13	ENSMUSG00000032652	Crebl2	protein_coding	6	134830154	134858931	cAMP responsive element binding protein-like 2 [Source:MGI Symbol;Acc:MGI:1889385]	0.915779	4.68828	14.8273	0.000117817	0.00162512
953	ENSMUSG00000032666.16	ENSMUSG00000032666	1700025G04Rik	protein_coding	1	151852403	152090125	RIKEN cDNA 1700025G04 gene [Source:MGI Symbol;Acc:MGI:1916649]	-1.10602	5.34771	22.1993	2.45767e-06	5.36565e-05
954	ENSMUSG00000032667.17	ENSMUSG00000032667	Pon2	protein_coding	6	5264147	5298455	paraoxonase 2 [Source:MGI Symbol;Acc:MGI:106687]	0.809719	6.05321	11.9161	0.000556508	0.00616679
955	ENSMUSG00000032702.16	ENSMUSG00000032702	Kank1	protein_coding	19	25236975	25434496	KN motif and ankyrin repeat domains 1 [Source:MGI Symbol;Acc:MGI:2147707]	1.78885	-0.491452	9.04338	0.00263648	0.0225268
956	ENSMUSG00000032717.14	ENSMUSG00000032717	Mdfi	protein_coding	17	47815328	47834691	MyoD family inhibitor [Source:MGI Symbol;Acc:MGI:107687]	-0.870321	4.84489	8.37285	0.00380867	0.0302188
957	ENSMUSG00000032719.4	ENSMUSG00000032719	Sbspon	protein_coding	1	15853862	15892722	somatomedin B and thrombospondin, type 1 domain containing [Source:MGI Symbol;Acc:MGI:2684952]	-1.91419	-0.13218	14.0249	0.000180403	0.00235071
958	ENSMUSG00000032737.13	ENSMUSG00000032737	Inppl1	protein_coding	7	101822632	101838229	inositol polyphosphate phosphatase-like 1 [Source:MGI Symbol;Acc:MGI:1333787]	1.58827	5.31238	55.9706	7.35644e-14	5.684e-12
959	ENSMUSG00000032841.15	ENSMUSG00000032841	Prr5l	protein_coding	2	101714285	101883027	proline rich 5 like [Source:MGI Symbol;Acc:MGI:1919696]	1.20696	2.71276	9.64009	0.00190376	0.0172753
960	ENSMUSG00000032845.15	ENSMUSG00000032845	Alpk2	protein_coding	18	65265529	65393888	alpha-kinase 2 [Source:MGI Symbol;Acc:MGI:2449492]	1.44534	2.30848	10.1663	0.00143029	0.0135819
961	ENSMUSG00000032854.12	ENSMUSG00000032854	Ugt8a	protein_coding	3	125865271	125938619	UDP galactosyltransferase 8A [Source:MGI Symbol;Acc:MGI:109522]	2.76266	1.58603	27.7473	1.38239e-07	4.00346e-06
962	ENSMUSG00000032864.4	ENSMUSG00000032864	Rag2	protein_coding	2	101624718	101632529	recombination activating gene 2 [Source:MGI Symbol;Acc:MGI:97849]	-1.29927	3.23798	7.33538	0.00676105	0.047239
963	ENSMUSG00000032883.15	ENSMUSG00000032883	Acsl3	protein_coding	1	78657825	78707743	acyl-CoA synthetase long-chain family member 3 [Source:MGI Symbol;Acc:MGI:1921455]	-0.999631	4.82177	14.649	0.000129505	0.00176298
964	ENSMUSG00000032889.6	ENSMUSG00000032889	Gm6685	protein_coding	11	28339104	28339867	predicted pseudogene 6685 [Source:MGI Symbol;Acc:MGI:3704119]	3.63448	-1.61709	19.3872	1.06721e-05	0.000197839
965	ENSMUSG00000032890.17	ENSMUSG00000032890	Rims3	protein_coding	4	120854816	120896579	regulating synaptic membrane exocytosis 3 [Source:MGI Symbol;Acc:MGI:2443331]	0.984722	2.05056	7.41736	0.00645974	0.0455846
966	ENSMUSG00000032915.6	ENSMUSG00000032915	Adgre4	protein_coding	17	55749984	55853662	adhesion G protein-coupled receptor E4 [Source:MGI Symbol;Acc:MGI:1196464]	3.04146	2.35459	22.8131	1.78541e-06	4.10168e-05
967	ENSMUSG00000032932.15	ENSMUSG00000032932	Hspa13	protein_coding	16	75745431	75767104	heat shock protein 70 family, member 13 [Source:MGI Symbol;Acc:MGI:1309463]	1.34649	6.10866	33.4019	7.49516e-09	2.75054e-07
968	ENSMUSG00000032966.14	ENSMUSG00000032966	Fkbp1a	protein_coding	2	151542483	151561692	FK506 binding protein 1a [Source:MGI Symbol;Acc:MGI:95541]	-0.892882	6.70595	12.7061	0.000364465	0.00429882
969	ENSMUSG00000032997.16	ENSMUSG00000032997	Chpf	protein_coding	1	75474569	75479307	chondroitin polymerizing factor [Source:MGI Symbol;Acc:MGI:106576]	2.08622	4.55167	26.6369	2.45505e-07	6.78224e-06
970	ENSMUSG00000033024.16	ENSMUSG00000033024	Klra9	protein_coding	6	130178675	130193112	killer cell lectin-like receptor subfamily A, member 9 [Source:MGI Symbol;Acc:MGI:1321153]	5.00162	1.34076	56.5319	5.5295e-14	4.32657e-12
971	ENSMUSG00000033027.15	ENSMUSG00000033027	Klrc3	protein_coding	6	129639064	129643337	killer cell lectin-like receptor subfamily C, member 3 [Source:MGI Symbol;Acc:MGI:1929720]	5.2906	0.982187	71.6808	2.52981e-17	3.0327e-15
972	ENSMUSG00000033060.15	ENSMUSG00000033060	Lmo7	protein_coding	14	101729957	101934710	LIM domain only 7 [Source:MGI Symbol;Acc:MGI:1353586]	1.33988	3.09564	9.34533	0.00223554	0.0197144
973	ENSMUSG00000033066.15	ENSMUSG00000033066	Gas7	protein_coding	11	67455437	67688990	growth arrest specific 7 [Source:MGI Symbol;Acc:MGI:1202388]	2.23617	4.40156	24.2592	8.42043e-07	2.08456e-05
974	ENSMUSG00000033102.15	ENSMUSG00000033102	Cdc14b	protein_coding	13	64189268	64275290	CDC14 cell division cycle 14B [Source:MGI Symbol;Acc:MGI:2441808]	1.0429	3.85859	9.22195	0.00239131	0.0208555
975	ENSMUSG00000033147.16	ENSMUSG00000033147	Slc22a15	protein_coding	3	101855776	101924453	solute carrier family 22 (organic anion/cation transporter), member 15 [Source:MGI Symbol;Acc:MGI:3607704]	0.806759	4.54243	9.10373	0.00255088	0.0219185
976	ENSMUSG00000033174.17	ENSMUSG00000033174	Mgll	protein_coding	6	88724412	88828360	monoglyceride lipase [Source:MGI Symbol;Acc:MGI:1346042]	2.48052	4.68022	16.6582	4.47563e-05	0.00070372
977	ENSMUSG00000033182.12	ENSMUSG00000033182	Kbtbd12	protein_coding	6	88545114	88637950	kelch repeat and BTB (POZ) domain containing 12 [Source:MGI Symbol;Acc:MGI:1918481]	1.76002	2.31852	15.1235	0.000100704	0.00142688
978	ENSMUSG00000033210.16	ENSMUSG00000033210	Slc9c1	protein_coding	16	45535309	45607001	solute carrier family 9, subfamily C (Na+-transporting carboxylic acid decarboxylase), member 1 [Source:MGI Symbol;Acc:MGI:2685456]	5.35542	-0.767096	39.0969	4.03278e-10	1.85078e-08
979	ENSMUSG00000033249.10	ENSMUSG00000033249	Hsf4	protein_coding	8	105269801	105275845	heat shock transcription factor 4 [Source:MGI Symbol;Acc:MGI:1347058]	1.5893	1.74699	11.0132	0.000904636	0.00934397
980	ENSMUSG00000033278.10	ENSMUSG00000033278	Ptprm	protein_coding	17	66666947	67354457	protein tyrosine phosphatase, receptor type, M [Source:MGI Symbol;Acc:MGI:102694]	2.91294	1.64531	47.8046	4.70896e-12	2.92903e-10
981	ENSMUSG00000033295.14	ENSMUSG00000033295	Ptprf	protein_coding	4	118208213	118291405	protein tyrosine phosphatase, receptor type, F [Source:MGI Symbol;Acc:MGI:102695]	1.85244	4.13992	28.098	1.15325e-07	3.38445e-06
982	ENSMUSG00000033327.16	ENSMUSG00000033327	Tnxb	protein_coding	17	34670535	34719815	tenascin XB [Source:MGI Symbol;Acc:MGI:1932137]	3.92256	0.691648	62.5045	2.65836e-15	2.43437e-13
983	ENSMUSG00000033350.7	ENSMUSG00000033350	Chst2	protein_coding	9	95399292	95406722	carbohydrate sulfotransferase 2 [Source:MGI Symbol;Acc:MGI:1891160]	1.57161	2.43812	16.0846	6.05747e-05	0.00090977
984	ENSMUSG00000033355.6	ENSMUSG00000033355	Rtp4	protein_coding	16	23520291	23614222	receptor transporter protein 4 [Source:MGI Symbol;Acc:MGI:1915025]	-0.819352	4.28067	8.08103	0.0044731	0.0342095
985	ENSMUSG00000033377.14	ENSMUSG00000033377	Palmd	protein_coding	3	116918258	116968987	palmdelphin [Source:MGI Symbol;Acc:MGI:2148896]	3.92917	1.18691	45.8765	1.2595e-11	7.24215e-10
986	ENSMUSG00000033400.14	ENSMUSG00000033400	Agl	protein_coding	3	116739999	116808166	amylo-1,6-glucosidase, 4-alpha-glucanotransferase [Source:MGI Symbol;Acc:MGI:1924809]	0.809438	5.3118	9.91321	0.00164096	0.0152529
987	ENSMUSG00000033467.12	ENSMUSG00000033467	Crlf2	protein_coding	5	109554709	109558993	cytokine receptor-like factor 2 [Source:MGI Symbol;Acc:MGI:1889506]	-1.24328	6.36681	27.8281	1.32585e-07	3.86805e-06
988	ENSMUSG00000033488.11	ENSMUSG00000033488	Cryzl2	protein_coding	1	157458577	157492638	crystallin zeta like 2 [Source:MGI Symbol;Acc:MGI:2448516]	-0.910995	4.95157	13.0561	0.000302298	0.00366164
989	ENSMUSG00000033540.18	ENSMUSG00000033540	Idua	protein_coding	5	108660331	108684557	iduronidase, alpha-L [Source:MGI Symbol;Acc:MGI:96418]	-0.578444	5.06036	7.42179	0.00644388	0.0455214
990	ENSMUSG00000033554.17	ENSMUSG00000033554	Dph5	protein_coding	3	115887837	115934361	diphthamide biosynthesis 5 [Source:MGI Symbol;Acc:MGI:1916990]	-0.806322	4.68981	9.69842	0.00184427	0.0168497
991	ENSMUSG00000033618.7	ENSMUSG00000033618	Map3k13	protein_coding	16	21794346	21933439	mitogen-activated protein kinase kinase kinase 13 [Source:MGI Symbol;Acc:MGI:2444243]	1.42615	1.50372	8.40149	0.00374915	0.0299387
992	ENSMUSG00000033634.7	ENSMUSG00000033634	Nat8f2	protein_coding	6	85865422	85869158	N-acetyltransferase 8 (GCN5-related) family member 2 [Source:MGI Symbol;Acc:MGI:2136446]	5.18201	-2.26478	15.0086	0.00010702	0.00150238
993	ENSMUSG00000033788.15	ENSMUSG00000033788	Dysf	protein_coding	6	84008590	84211060	dysferlin [Source:MGI Symbol;Acc:MGI:1349385]	3.49248	-1.69515	15.1738	9.80523e-05	0.00139531
994	ENSMUSG00000033825.9	ENSMUSG00000033825	Tpsb2	protein_coding	17	25366550	25368094	tryptase beta 2 [Source:MGI Symbol;Acc:MGI:96942]	5.47352	-1.74456	16.5677	4.69437e-05	0.000731138
995	ENSMUSG00000033826.9	ENSMUSG00000033826	Dnah8	protein_coding	17	30624354	30875264	dynein, axonemal, heavy chain 8 [Source:MGI Symbol;Acc:MGI:107714]	-1.07053	5.57922	10.3255	0.00131201	0.0127089
996	ENSMUSG00000033882.15	ENSMUSG00000033882	Rbm46	protein_coding	3	82837228	82876483	RNA binding motif protein 46 [Source:MGI Symbol;Acc:MGI:3645057]	2.05298	-1.69767	11.1825	0.000825728	0.0086509
997	ENSMUSG00000034028.15	ENSMUSG00000034028	Cd226	protein_coding	18	89197431	89270201	CD226 antigen [Source:MGI Symbol;Acc:MGI:3039602]	2.20382	3.45336	16.2288	5.61341e-05	0.000850178
998	ENSMUSG00000034066.13	ENSMUSG00000034066	Farp2	protein_coding	1	93512079	93621976	FERM, RhoGEF and pleckstrin domain protein 2 [Source:MGI Symbol;Acc:MGI:2385126]	2.51643	3.60417	33.6288	6.66966e-09	2.47516e-07
999	ENSMUSG00000034118.15	ENSMUSG00000034118	Tpst1	protein_coding	5	130073326	130135729	protein-tyrosine sulfotransferase 1 [Source:MGI Symbol;Acc:MGI:1298231]	1.09589	4.86433	13.1636	0.000285443	0.00348565
1000	ENSMUSG00000034168.7	ENSMUSG00000034168	Irf2bpl	protein_coding	12	86880701	86884798	interferon regulatory factor 2 binding protein-like [Source:MGI Symbol;Acc:MGI:2442463]	0.921762	4.8269	12.3673	0.000436929	0.00500722
1001	ENSMUSG00000034177.15	ENSMUSG00000034177	Rnf43	protein_coding	11	87662722	87735539	ring finger protein 43 [Source:MGI Symbol;Acc:MGI:2442609]	3.0196	2.99128	38.2061	6.36537e-10	2.82937e-08
1002	ENSMUSG00000034192.5	ENSMUSG00000034192	Lsm3	protein_coding	6	91515928	91522625	LSM3 homolog, U6 small nuclear RNA and mRNA degradation associated [Source:MGI Symbol;Acc:MGI:1914928]	-1.17681	5.35175	16.9818	3.77407e-05	0.000604462
1003	ENSMUSG00000034329.16	ENSMUSG00000034329	Brip1	protein_coding	11	86058138	86201193	BRCA1 interacting protein C-terminal helicase 1 [Source:MGI Symbol;Acc:MGI:2442836]	-0.723507	4.89047	8.63388	0.00329968	0.0270036
1004	ENSMUSG00000034353.14	ENSMUSG00000034353	Ramp1	protein_coding	1	91179822	91225196	receptor (calcitonin) activity modifying protein 1 [Source:MGI Symbol;Acc:MGI:1858418]	-0.930512	7.30975	8.58147	0.003396	0.0276773
1005	ENSMUSG00000034361.10	ENSMUSG00000034361	Cpne2	protein_coding	8	94532990	94570531	copine II [Source:MGI Symbol;Acc:MGI:2387578]	-0.828568	6.50813	12.1297	0.000496255	0.00557723
1006	ENSMUSG00000034377.10	ENSMUSG00000034377	Tulp4	protein_coding	17	6106437	6251128	tubby like protein 4 [Source:MGI Symbol;Acc:MGI:1916092]	1.6153	3.59748	20.8805	4.88858e-06	9.81687e-05
1007	ENSMUSG00000034424.5	ENSMUSG00000034424	Gcsh	protein_coding	8	116981810	116993537	glycine cleavage system protein H (aminomethyl carrier) [Source:MGI Symbol;Acc:MGI:1915383]	-0.844261	4.97581	10.5738	0.00114703	0.0113498
1008	ENSMUSG00000034460.9	ENSMUSG00000034460	Six4	protein_coding	12	73099609	73113456	sine oculis-related homeobox 4 [Source:MGI Symbol;Acc:MGI:106034]	3.82487	-0.838612	14.4883	0.00014103	0.00188996
1009	ENSMUSG00000034471.12	ENSMUSG00000034471	Caskin2	protein_coding	11	115799183	115813639	CASK-interacting protein 2 [Source:MGI Symbol;Acc:MGI:2157062]	-1.16425	4.52104	23.8017	1.06788e-06	2.57593e-05
1010	ENSMUSG00000034557.14	ENSMUSG00000034557	Zfyve9	protein_coding	4	108637466	108780798	zinc finger, FYVE domain containing 9 [Source:MGI Symbol;Acc:MGI:2652838]	0.939509	2.31217	7.54826	0.00600681	0.0430693
1011	ENSMUSG00000034574.10	ENSMUSG00000034574	Daam1	protein_coding	12	71831078	71992333	dishevelled associated activator of morphogenesis 1 [Source:MGI Symbol;Acc:MGI:1914596]	0.897559	4.01318	7.72144	0.00545689	0.0398882
1012	ENSMUSG00000034586.14	ENSMUSG00000034586	Hid1	protein_coding	11	115347707	115367756	HID1 domain containing [Source:MGI Symbol;Acc:MGI:2445087]	2.1318	6.00804	42.0832	8.7472e-11	4.41377e-09
1013	ENSMUSG00000034587.8	ENSMUSG00000034587	8430429K09Rik	processed_transcript	11	3452365	3479831	RIKEN cDNA 8430429K09 gene [Source:MGI Symbol;Acc:MGI:1918773]	-1.2459	1.69895	10.6258	0.00111519	0.0110856
1014	ENSMUSG00000034591.5	ENSMUSG00000034591	Slc41a2	protein_coding	10	83230848	83337882	solute carrier family 41, member 2 [Source:MGI Symbol;Acc:MGI:2442940]	2.54598	2.08633	20.1052	7.32977e-06	0.000142122
1015	ENSMUSG00000034634.7	ENSMUSG00000034634	Ly6d	protein_coding	15	74762056	74763620	lymphocyte antigen 6 complex, locus D [Source:MGI Symbol;Acc:MGI:96881]	1.06811	6.53129	7.28476	0.00695419	0.0482815
1016	ENSMUSG00000034664.13	ENSMUSG00000034664	Itga2b	protein_coding	11	102453297	102470122	integrin alpha 2b [Source:MGI Symbol;Acc:MGI:96601]	-1.20648	6.38293	19.1827	1.18787e-05	0.000217557
1017	ENSMUSG00000034674.18	ENSMUSG00000034674	Tdg	protein_coding	10	82629828	82650799	thymine DNA glycosylase [Source:MGI Symbol;Acc:MGI:108247]	-1.12512	4.32054	16.372	5.20486e-05	0.000800561
1018	ENSMUSG00000034681.16	ENSMUSG00000034681	Rnps1	protein_coding	17	24414675	24425895	ribonucleic acid binding protein S1 [Source:MGI Symbol;Acc:MGI:97960]	-1.34302	5.66597	37.4694	9.28592e-10	4.01916e-08
1019	ENSMUSG00000034684.12	ENSMUSG00000034684	Sema3f	protein_coding	9	107681500	107710475	sema domain, immunoglobulin domain (Ig), short basic domain, secreted, (semaphorin) 3F [Source:MGI Symbol;Acc:MGI:1096347]	2.90785	2.45704	40.0995	2.41346e-10	1.14206e-08
1020	ENSMUSG00000034687.8	ENSMUSG00000034687	Fras1	protein_coding	5	96373955	96784728	Fraser extracellular matrix complex subunit 1 [Source:MGI Symbol;Acc:MGI:2385368]	4.09254	1.58641	26.5429	2.57753e-07	7.08105e-06
1021	ENSMUSG00000034708.11	ENSMUSG00000034708	Grn	protein_coding	11	102430315	102437048	granulin [Source:MGI Symbol;Acc:MGI:95832]	0.834928	7.45474	7.44965	0.00634486	0.0449504
1022	ENSMUSG00000034731.10	ENSMUSG00000034731	Dgkh	protein_coding	14	78558750	78732776	diacylglycerol kinase, eta [Source:MGI Symbol;Acc:MGI:2444188]	1.33596	3.15614	8.74421	0.00310586	0.0257369
1023	ENSMUSG00000034773.16	ENSMUSG00000034773	BC030867	protein_coding	11	102248882	102265187	cDNA sequence BC030867 [Source:MGI Symbol;Acc:MGI:2387601]	-0.78472	4.13708	8.14839	0.00430995	0.0333271
1024	ENSMUSG00000034783.7	ENSMUSG00000034783	Cd207	protein_coding	6	83671215	83677857	CD207 antigen [Source:MGI Symbol;Acc:MGI:2180021]	2.87921	-2.40097	9.6448	0.00189889	0.017261
1025	ENSMUSG00000034795.14	ENSMUSG00000034795	Ccdc122	protein_coding	14	77036772	77112257	coiled-coil domain containing 122 [Source:MGI Symbol;Acc:MGI:1918358]	-1.11606	2.70005	9.39266	0.00217855	0.0193584
1026	ENSMUSG00000034796.14	ENSMUSG00000034796	Cpne7	protein_coding	8	123117374	123135182	copine VII [Source:MGI Symbol;Acc:MGI:2142747]	2.1525	3.50644	9.31052	0.00227842	0.0200299
1027	ENSMUSG00000034833.10	ENSMUSG00000034833	Tespa1	protein_coding	10	130322870	130364111	thymocyte expressed, positive selection associated 1 [Source:MGI Symbol;Acc:MGI:1914846]	-0.855104	5.4518	13.2749	0.000268985	0.00331553
1028	ENSMUSG00000034858.16	ENSMUSG00000034858	Fam214a	protein_coding	9	74952884	75032468	family with sequence similarity 214, member A [Source:MGI Symbol;Acc:MGI:2387648]	1.24217	7.28207	12.2823	0.000457284	0.00520339
1029	ENSMUSG00000034881.8	ENSMUSG00000034881	Tbxa2r	protein_coding	10	81328731	81335172	thromboxane A2 receptor [Source:MGI Symbol;Acc:MGI:98496]	-1.08643	4.57791	15.0326	0.000105671	0.00148767
1030	ENSMUSG00000034898.16	ENSMUSG00000034898	Filip1	protein_coding	9	79815051	80012851	filamin A interacting protein 1 [Source:MGI Symbol;Acc:MGI:1917848]	3.84283	2.40245	62.5343	2.61851e-15	2.40903e-13
1031	ENSMUSG00000034926.3	ENSMUSG00000034926	Dhcr24	protein_coding	4	106561038	106589113	24-dehydrocholesterol reductase [Source:MGI Symbol;Acc:MGI:1922004]	-0.708705	5.3546	8.18303	0.00422841	0.032825
1032	ENSMUSG00000034936.2	ENSMUSG00000034936	Arl4d	protein_coding	11	101665541	101667832	ADP-ribosylation factor-like 4D [Source:MGI Symbol;Acc:MGI:1933155]	2.34665	2.59121	21.965	2.77672e-06	5.98296e-05
1033	ENSMUSG00000034957.10	ENSMUSG00000034957	Cebpa	protein_coding	7	35119293	35121928	CCAAT/enhancer binding protein (C/EBP), alpha [Source:MGI Symbol;Acc:MGI:99480]	0.727901	5.73093	7.68529	0.00556726	0.0405009
1034	ENSMUSG00000034981.9	ENSMUSG00000034981	Parm1	protein_coding	5	91517615	91626894	prostate androgen-regulated mucin-like protein 1 [Source:MGI Symbol;Acc:MGI:2443349]	-1.64965	1.41279	15.7582	7.19742e-05	0.00106243
1035	ENSMUSG00000035042.2	ENSMUSG00000035042	Ccl5	protein_coding	11	83525778	83530518	chemokine (C-C motif) ligand 5 [Source:MGI Symbol;Acc:MGI:98262]	2.27838	4.85307	17.8436	2.39819e-05	0.000404746
1036	ENSMUSG00000035104.14	ENSMUSG00000035104	Eva1a	protein_coding	6	82041043	82093099	eva-1 homolog A (C. elegans) [Source:MGI Symbol;Acc:MGI:2385247]	2.43208	-0.0020099	17.7855	2.47258e-05	0.000415881
1037	ENSMUSG00000035105.5	ENSMUSG00000035105	Egln3	protein_coding	12	54178981	54203860	egl-9 family hypoxia-inducible factor 3 [Source:MGI Symbol;Acc:MGI:1932288]	-1.11694	5.11033	17.9834	2.22838e-05	0.000380634
1038	ENSMUSG00000035126.19	ENSMUSG00000035126	Wdr78	protein_coding	4	103038065	103114555	WD repeat domain 78 [Source:MGI Symbol;Acc:MGI:2385328]	-1.07233	2.5885	8.54445	0.00346578	0.028061
1039	ENSMUSG00000035172.15	ENSMUSG00000035172	Plekhh3	protein_coding	11	101162679	101171351	pleckstrin homology domain containing, family H (with MyTH4 domain) member 3 [Source:MGI Symbol;Acc:MGI:2384950]	2.22137	1.95156	22.3294	2.29663e-06	5.09846e-05
1040	ENSMUSG00000035173.14	ENSMUSG00000035173	Ccdc186	protein_coding	19	56787481	56822190	coiled-coil domain containing 186 [Source:MGI Symbol;Acc:MGI:2445022]	0.806855	5.19437	9.70979	0.00183289	0.016769
1041	ENSMUSG00000035184.15	ENSMUSG00000035184	Fam124a	protein_coding	14	62555737	62608486	family with sequence similarity 124, member A [Source:MGI Symbol;Acc:MGI:3645930]	4.00043	-2.22316	17.5715	2.76704e-05	0.000459415
1042	ENSMUSG00000035208.16	ENSMUSG00000035208	Slfn8	protein_coding	11	83002158	83020810	schlafen 8 [Source:MGI Symbol;Acc:MGI:2672859]	1.08955	6.13986	17.8704	2.3647e-05	0.000400118
1043	ENSMUSG00000035273.14	ENSMUSG00000035273	Hpse	protein_coding	5	100679484	100719716	heparanase [Source:MGI Symbol;Acc:MGI:1343124]	1.02884	4.56742	14.2639	0.000158885	0.0021064
1044	ENSMUSG00000035283.4	ENSMUSG00000035283	Adrb1	protein_coding	19	56722372	56724862	adrenergic receptor, beta 1 [Source:MGI Symbol;Acc:MGI:87937]	3.18238	-0.0436064	18.8863	1.38747e-05	0.00025132
1045	ENSMUSG00000035299.16	ENSMUSG00000035299	Mid1	protein_coding	X	169685199	170005736	midline 1 [Source:MGI Symbol;Acc:MGI:1100537]	-2.1475	3.06079	19.9671	7.87844e-06	0.00015115
1046	ENSMUSG00000035357.16	ENSMUSG00000035357	Pdzrn3	protein_coding	6	101149609	101377897	PDZ domain containing RING finger 3 [Source:MGI Symbol;Acc:MGI:1933157]	5.187	-0.101658	57.5874	3.23285e-14	2.5889e-12
1047	ENSMUSG00000035413.8	ENSMUSG00000035413	Tmem98	protein_coding	11	80810175	80822033	transmembrane protein 98 [Source:MGI Symbol;Acc:MGI:1923457]	-0.987275	4.11132	7.23071	0.0071667	0.0495136
1048	ENSMUSG00000035435.16	ENSMUSG00000035435	Abca17	protein_coding	17	24264259	24351029	ATP-binding cassette, sub-family A (ABC1), member 17 [Source:MGI Symbol;Acc:MGI:3625331]	1.58708	-0.785523	8.91525	0.00282799	0.023854
1049	ENSMUSG00000035448.9	ENSMUSG00000035448	Ccr3	protein_coding	9	124021972	124031689	chemokine (C-C motif) receptor 3 [Source:MGI Symbol;Acc:MGI:104616]	2.38707	0.285975	14.5654	0.000135377	0.00183282
1050	ENSMUSG00000035472.14	ENSMUSG00000035472	Slc25a21	protein_coding	12	56712634	57197472	solute carrier family 25 (mitochondrial oxodicarboxylate carrier), member 21 [Source:MGI Symbol;Acc:MGI:2445059]	2.16738	1.80985	18.8978	1.37909e-05	0.00025003
1051	ENSMUSG00000035513.19	ENSMUSG00000035513	Ntng2	protein_coding	2	29194541	29253005	netrin G2 [Source:MGI Symbol;Acc:MGI:2159341]	0.832919	4.8088	7.31998	0.00681923	0.0475279
1052	ENSMUSG00000035580.10	ENSMUSG00000035580	Kcnh8	protein_coding	17	52602709	52979194	potassium voltage-gated channel, subfamily H (eag-related), member 8 [Source:MGI Symbol;Acc:MGI:2445160]	6.41425	0.825638	91.7956	9.61056e-22	1.8456e-19
1053	ENSMUSG00000035638.14	ENSMUSG00000035638	Muc20	protein_coding	16	32777419	32797435	mucin 20 [Source:MGI Symbol;Acc:MGI:2385039]	3.11075	-1.01009	16.2548	5.53699e-05	0.000841267
1054	ENSMUSG00000035642.16	ENSMUSG00000035642	Aamdc	protein_coding	7	97550331	97579497	adipogenesis associated Mth938 domain containing [Source:MGI Symbol;Acc:MGI:1913523]	-0.924688	3.21515	7.33753	0.00675297	0.0472326
1055	ENSMUSG00000035694.15	ENSMUSG00000035694	Caps2	protein_coding	10	112163621	112216555	calcyphosphine 2 [Source:MGI Symbol;Acc:MGI:2441980]	-1.92813	-0.739981	9.88729	0.00166424	0.0154331
1056	ENSMUSG00000035704.17	ENSMUSG00000035704	Alg8	protein_coding	7	97371606	97392185	asparagine-linked glycosylation 8 (alpha-1,3-glucosyltransferase) [Source:MGI Symbol;Acc:MGI:2141959]	-1.18083	4.83867	26.3212	2.89105e-07	7.85507e-06
1057	ENSMUSG00000035759.4	ENSMUSG00000035759	Bbs10	protein_coding	10	111298679	111301727	Bardet-Biedl syndrome 10 (human) [Source:MGI Symbol;Acc:MGI:1919019]	-1.47605	2.81404	13.8712	0.000195779	0.0025228
1058	ENSMUSG00000035775.2	ENSMUSG00000035775	Krt20	protein_coding	11	99428403	99438150	keratin 20 [Source:MGI Symbol;Acc:MGI:1914059]	-3.70864	-1.55601	10.2049	0.00140071	0.0133523
1059	ENSMUSG00000035835.14	ENSMUSG00000035835	Plppr3	protein_coding	10	79860475	79874634	phospholipid phosphatase related 3 [Source:MGI Symbol;Acc:MGI:2388640]	-0.959436	7.4616	12.9248	0.000324258	0.00389424
1060	ENSMUSG00000035849.14	ENSMUSG00000035849	Krt222	protein_coding	11	99232761	99244085	keratin 222 [Source:MGI Symbol;Acc:MGI:2442728]	3.59434	3.89958	26.7001	2.37603e-07	6.58234e-06
1061	ENSMUSG00000035852.11	ENSMUSG00000035852	Misp	protein_coding	10	79820989	79830490	mitotic spindle positioning [Source:MGI Symbol;Acc:MGI:1926156]	-1.99191	-1.28876	10.1395	0.00145124	0.0137408
1062	ENSMUSG00000035873.8	ENSMUSG00000035873	Pawr	protein_coding	10	108332121	108414240	PRKC, apoptosis, WT1, regulator [Source:MGI Symbol;Acc:MGI:2149961]	2.4185	1.83845	28.2697	1.05535e-07	3.12032e-06
1063	ENSMUSG00000035944.17	ENSMUSG00000035944	Ttc38	protein_coding	15	85832306	85858822	tetratricopeptide repeat domain 38 [Source:MGI Symbol;Acc:MGI:2146198]	-0.730825	4.24829	8.58542	0.00338865	0.0276288
1064	ENSMUSG00000035948.13	ENSMUSG00000035948	Acss3	protein_coding	10	106933517	107123668	acyl-CoA synthetase short-chain family member 3 [Source:MGI Symbol;Acc:MGI:2685720]	3.01885	0.316158	36.7921	1.31418e-09	5.56629e-08
1065	ENSMUSG00000035954.10	ENSMUSG00000035954	Dock4	protein_coding	12	40445952	40846874	dedicator of cytokinesis 4 [Source:MGI Symbol;Acc:MGI:1918006]	1.38903	1.0162	9.81501	0.00173093	0.0159766
1066	ENSMUSG00000035960.14	ENSMUSG00000035960	Apex1	protein_coding	14	50924968	50927139	apurinic/apyrimidinic endonuclease 1 [Source:MGI Symbol;Acc:MGI:88042]	-0.858685	4.51641	9.2941	0.00229893	0.0201653
1067	ENSMUSG00000036078.16	ENSMUSG00000036078	Sigmar1	protein_coding	4	41738493	41756157	sigma non-opioid intracellular receptor 1 [Source:MGI Symbol;Acc:MGI:1195268]	0.63892	5.35696	8.14322	0.00432224	0.0333597
1068	ENSMUSG00000036181.2	ENSMUSG00000036181	Hist1h1c	protein_coding	13	23738808	23740367	histone cluster 1, H1c [Source:MGI Symbol;Acc:MGI:1931526]	1.42762	6.06288	14.5227	0.000138479	0.00186334
1069	ENSMUSG00000036185.9	ENSMUSG00000036185	Sapcd1	protein_coding	17	35025959	35028016	suppressor APC domain containing 1 [Source:MGI Symbol;Acc:MGI:2388100]	1.47285	2.73154	19.5944	9.57472e-06	0.000179445
1070	ENSMUSG00000036186.5	ENSMUSG00000036186	Fam69b	protein_coding	2	26628457	26636497	family with sequence similarity 69, member B [Source:MGI Symbol;Acc:MGI:1927576]	-1.10221	4.79791	14.9169	0.000112352	0.00156392
1071	ENSMUSG00000036225.14	ENSMUSG00000036225	Kctd1	protein_coding	18	14968685	15151446	potassium channel tetramerisation domain containing 1 [Source:MGI Symbol;Acc:MGI:1918269]	-0.813857	4.76432	10.6849	0.00108014	0.0108123
1072	ENSMUSG00000036278.6	ENSMUSG00000036278	Macrod1	protein_coding	19	7056768	7198061	MACRO domain containing 1 [Source:MGI Symbol;Acc:MGI:2147583]	-0.753525	5.1147	7.31882	0.00682361	0.0475418
1073	ENSMUSG00000036295.5	ENSMUSG00000036295	Lrrn3	protein_coding	12	41451668	41486431	leucine rich repeat protein 3, neuronal [Source:MGI Symbol;Acc:MGI:106036]	3.34865	4.35987	60.8881	6.04122e-15	5.26411e-13
1074	ENSMUSG00000036322.10	ENSMUSG00000036322	H2-Ea-ps	unprocessed_pseudogene	17	34342933	34344643	histocompatibility 2, class II antigen E alpha, pseudogene [Source:MGI Symbol;Acc:MGI:95900]	13.5176	4.31651	465.14	3.65819e-103	9.04488e-100
1075	ENSMUSG00000036330.12	ENSMUSG00000036330	Slc18a1	protein_coding	8	69037711	69089235	solute carrier family 18 (vesicular monoamine), member 1 [Source:MGI Symbol;Acc:MGI:106684]	-2.3782	1.86421	27.0837	1.94834e-07	5.53148e-06
1076	ENSMUSG00000036381.13	ENSMUSG00000036381	P2ry14	protein_coding	3	59113855	59153618	purinergic receptor P2Y, G-protein coupled, 14 [Source:MGI Symbol;Acc:MGI:2155705]	-1.37511	4.3808	21.8461	2.95415e-06	6.31709e-05
1077	ENSMUSG00000036391.16	ENSMUSG00000036391	Sec24a	protein_coding	11	51692264	51763634	Sec24 related gene family, member A (S. cerevisiae) [Source:MGI Symbol;Acc:MGI:1924621]	1.13371	5.6354	18.1567	2.03451e-05	0.000352697
1078	ENSMUSG00000036427.5	ENSMUSG00000036427	Gpi1	protein_coding	7	34201330	34230336	glucose phosphate isomerase 1 [Source:MGI Symbol;Acc:MGI:95797]	-0.872443	8.16414	8.06673	0.00450855	0.0343226
1079	ENSMUSG00000036502.14	ENSMUSG00000036502	Tmem255a	protein_coding	X	38196573	38252439	transmembrane protein 255A [Source:MGI Symbol;Acc:MGI:3045722]	4.0925	1.9438	35.8954	2.08203e-09	8.45636e-08
1080	ENSMUSG00000036526.8	ENSMUSG00000036526	Card11	protein_coding	5	140872990	141000582	caspase recruitment domain family, member 11 [Source:MGI Symbol;Acc:MGI:1916978]	1.2879	5.83346	12.5621	0.000393649	0.00458292
1081	ENSMUSG00000036585.15	ENSMUSG00000036585	Fgf1	protein_coding	18	38838673	38929404	fibroblast growth factor 1 [Source:MGI Symbol;Acc:MGI:95515]	3.05203	1.07675	22.139	2.5361e-06	5.51861e-05
1082	ENSMUSG00000036587.13	ENSMUSG00000036587	Fut7	protein_coding	2	25423267	25426374	fucosyltransferase 7 [Source:MGI Symbol;Acc:MGI:107692]	-0.856958	4.86207	9.55279	0.00199646	0.0179827
1083	ENSMUSG00000036617.16	ENSMUSG00000036617	Etl4	protein_coding	2	19909780	20810713	enhancer trap locus 4 [Source:MGI Symbol;Acc:MGI:95454]	2.15924	4.22676	22.277	2.36012e-06	5.19857e-05
1084	ENSMUSG00000036634.15	ENSMUSG00000036634	Mag	protein_coding	7	30899176	30914873	myelin-associated glycoprotein [Source:MGI Symbol;Acc:MGI:96912]	2.21035	0.134827	10.5579	0.00115695	0.011441
1085	ENSMUSG00000036639.12	ENSMUSG00000036639	Nudt1	protein_coding	5	140321656	140338137	nudix (nucleoside diphosphate linked moiety X)-type motif 1 [Source:MGI Symbol;Acc:MGI:109280]	-1.43573	4.02198	16.508	4.84463e-05	0.000752172
1086	ENSMUSG00000036646.13	ENSMUSG00000036646	Man1b1	protein_coding	2	25332338	25352212	mannosidase, alpha, class 1B, member 1 [Source:MGI Symbol;Acc:MGI:2684954]	0.898979	7.7785	9.36805	0.002208	0.0195498
1087	ENSMUSG00000036733.16	ENSMUSG00000036733	Rbm42	protein_coding	7	30640999	30650317	RNA binding motif protein 42 [Source:MGI Symbol;Acc:MGI:1915285]	1.56771	-0.732714	8.07848	0.00447941	0.0342095
1088	ENSMUSG00000036748.15	ENSMUSG00000036748	Cuedc2	protein_coding	19	46329812	46338660	CUE domain containing 2 [Source:MGI Symbol;Acc:MGI:1914366]	-0.744963	6.28524	7.63119	0.00573674	0.0414891
1089	ENSMUSG00000036820.11	ENSMUSG00000036820	Amdhd2	protein_coding	17	24155833	24163766	amidohydrolase domain containing 2 [Source:MGI Symbol;Acc:MGI:2443978]	-1.05057	4.36811	12.992	0.000312827	0.00376611
1090	ENSMUSG00000036887.5	ENSMUSG00000036887	C1qa	protein_coding	4	136895917	136898803	complement component 1, q subcomponent, alpha polypeptide [Source:MGI Symbol;Acc:MGI:88223]	2.60212	1.34416	20.5618	5.77376e-06	0.000114434
1091	ENSMUSG00000036896.5	ENSMUSG00000036896	C1qc	protein_coding	4	136889804	136893065	complement component 1, q subcomponent, C chain [Source:MGI Symbol;Acc:MGI:88225]	2.31501	1.30032	15.7631	7.17876e-05	0.00106046
1092	ENSMUSG00000036905.8	ENSMUSG00000036905	C1qb	protein_coding	4	136880129	136886187	complement component 1, q subcomponent, beta polypeptide [Source:MGI Symbol;Acc:MGI:88224]	2.52984	1.17835	16.3606	5.23635e-05	0.000804154
1093	ENSMUSG00000036995.7	ENSMUSG00000036995	Asap3	protein_coding	4	136206365	136245216	ArfGAP with SH3 domain, ankyrin repeat and PH domain 3 [Source:MGI Symbol;Acc:MGI:2684986]	1.8237	0.595975	17.3457	3.116e-05	0.000507698
1094	ENSMUSG00000037031.10	ENSMUSG00000037031	Tspan15	protein_coding	10	62185396	62231251	tetraspanin 15 [Source:MGI Symbol;Acc:MGI:1917673]	4.08997	3.12369	34.6143	4.01944e-09	1.56505e-07
1095	ENSMUSG00000037033.9	ENSMUSG00000037033	Clca3b	protein_coding	3	144822623	144849357	chloride channel accessory 3B [Source:MGI Symbol;Acc:MGI:2181989]	-3.68964	-1.70188	9.46435	0.00209504	0.0187341
1096	ENSMUSG00000037035.5	ENSMUSG00000037035	Inhbb	protein_coding	1	119415465	119422248	inhibin beta-B [Source:MGI Symbol;Acc:MGI:96571]	3.65014	-0.689326	25.6804	4.02895e-07	1.05553e-05
1097	ENSMUSG00000037124.6	ENSMUSG00000037124	Trim58	protein_coding	11	58640465	58652404	tripartite motif-containing 58 [Source:MGI Symbol;Acc:MGI:2684862]	1.18442	3.23524	7.91296	0.0049082	0.0366909
1098	ENSMUSG00000037188.7	ENSMUSG00000037188	Grhl3	protein_coding	4	135541888	135573630	grainyhead like transcription factor 3 [Source:MGI Symbol;Acc:MGI:2655333]	3.96515	-0.465681	29.6926	5.06282e-08	1.59463e-06
1099	ENSMUSG00000037202.6	ENSMUSG00000037202	Prf1	protein_coding	10	61297833	61304680	perforin 1 (pore forming protein) [Source:MGI Symbol;Acc:MGI:97551]	3.01736	2.60312	38.3679	5.85878e-10	2.62187e-08
1100	ENSMUSG00000037221.13	ENSMUSG00000037221	Mospd3	protein_coding	5	137596645	137601058	motile sperm domain containing 3 [Source:MGI Symbol;Acc:MGI:1916179]	-1.01628	5.11701	19.3196	1.10563e-05	0.000204006
1101	ENSMUSG00000037224.15	ENSMUSG00000037224	Zfyve28	protein_coding	5	34194893	34288449	zinc finger, FYVE domain containing 28 [Source:MGI Symbol;Acc:MGI:2684992]	1.70581	2.26282	13.7492	0.000208906	0.00266723
1102	ENSMUSG00000037225.13	ENSMUSG00000037225	Fgf2	protein_coding	3	37348346	37410108	fibroblast growth factor 2 [Source:MGI Symbol;Acc:MGI:95516]	-1.55616	2.31514	15.6025	7.81517e-05	0.00114677
1103	ENSMUSG00000037259.15	ENSMUSG00000037259	Dzank1	protein_coding	2	144470557	144527414	double zinc ribbon and ankyrin repeat domains 1 [Source:MGI Symbol;Acc:MGI:2139080]	1.94092	0.538299	21.6803	3.22088e-06	6.82109e-05
1104	ENSMUSG00000037280.12	ENSMUSG00000037280	Galnt6	protein_coding	15	100691813	100729376	polypeptide N-acetylgalactosaminyltransferase 6 [Source:MGI Symbol;Acc:MGI:1891640]	-1.66389	6.11798	64.5385	9.46644e-16	9.22395e-14
1105	ENSMUSG00000037306.13	ENSMUSG00000037306	Man1c1	protein_coding	4	134561690	134704290	mannosidase, alpha, class 1C, member 1 [Source:MGI Symbol;Acc:MGI:2446214]	0.699989	5.04549	10.4713	0.00121243	0.0118899
1106	ENSMUSG00000037362.8	ENSMUSG00000037362	Nov	protein_coding	15	54745702	54754039	nephroblastoma overexpressed gene [Source:MGI Symbol;Acc:MGI:109185]	6.01363	1.59511	92.1778	7.92294e-22	1.54737e-19
1107	ENSMUSG00000037370.13	ENSMUSG00000037370	Enpp1	protein_coding	10	24637914	24712159	ectonucleotide pyrophosphatase/phosphodiesterase 1 [Source:MGI Symbol;Acc:MGI:97370]	2.54963	5.11144	49.2837	2.21499e-12	1.43648e-10
1108	ENSMUSG00000037386.16	ENSMUSG00000037386	Rims2	protein_coding	15	39198261	39684372	regulating synaptic membrane exocytosis 2 [Source:MGI Symbol;Acc:MGI:2152972]	4.15851	2.76629	32.6492	1.10385e-08	3.96265e-07
1109	ENSMUSG00000037390.12	ENSMUSG00000037390	Muc3	protein_coding	5	137134922	137149322	mucin 3, intestinal [Source:MGI Symbol;Acc:MGI:1203527]	-4.02674	-0.670484	22.1826	2.47905e-06	5.4004e-05
1110	ENSMUSG00000037411.10	ENSMUSG00000037411	Serpine1	protein_coding	5	137061504	137072268	serine (or cysteine) peptidase inhibitor, clade E, member 1 [Source:MGI Symbol;Acc:MGI:97608]	3.24889	-1.16087	10.8147	0.00100697	0.0102039
1111	ENSMUSG00000037461.10	ENSMUSG00000037461	Ints7	protein_coding	1	191575636	191623688	integrator complex subunit 7 [Source:MGI Symbol;Acc:MGI:1924315]	-0.704564	6.83019	10.1394	0.00145135	0.0137408
1112	ENSMUSG00000037492.16	ENSMUSG00000037492	Zmat4	protein_coding	8	23636019	24156585	zinc finger, matrin type 4 [Source:MGI Symbol;Acc:MGI:2443497]	4.07877	-1.88716	28.6994	8.45289e-08	2.55655e-06
1113	ENSMUSG00000037493.6	ENSMUSG00000037493	Cib2	protein_coding	9	54544794	54560218	calcium and integrin binding family member 2 [Source:MGI Symbol;Acc:MGI:1929293]	1.70353	2.40941	9.42754	0.00213751	0.0190364
1114	ENSMUSG00000037568.12	ENSMUSG00000037568	Vash2	protein_coding	1	190947646	190979296	vasohibin 2 [Source:MGI Symbol;Acc:MGI:2444826]	-1.14708	1.17111	8.73882	0.00311506	0.0257699
1115	ENSMUSG00000037572.17	ENSMUSG00000037572	Wdhd1	protein_coding	14	47240944	47276857	WD repeat and HMG-box DNA binding protein 1 [Source:MGI Symbol;Acc:MGI:2443514]	-0.608043	6.18502	7.77333	0.00530232	0.039076
1116	ENSMUSG00000037580.10	ENSMUSG00000037580	Gch1	protein_coding	14	47153895	47189413	GTP cyclohydrolase 1 [Source:MGI Symbol;Acc:MGI:95675]	-1.27295	4.26481	19.1532	1.20636e-05	0.000220739
1117	ENSMUSG00000037583.2	ENSMUSG00000037583	Nr0b2	protein_coding	4	133553376	133556536	nuclear receptor subfamily 0, group B, member 2 [Source:MGI Symbol;Acc:MGI:1346344]	-1.16845	0.210879	7.38867	0.00656359	0.0461982
1118	ENSMUSG00000037594.11	ENSMUSG00000037594	Clba1	protein_coding	12	112808937	112816252	clathrin binding box of aftiphilin containing 1 [Source:MGI Symbol;Acc:MGI:2443738]	1.01622	2.10975	8.03092	0.00459854	0.0348369
1119	ENSMUSG00000037600.16	ENSMUSG00000037600	Kdf1	protein_coding	4	133518963	133530790	keratinocyte differentiation factor 1 [Source:MGI Symbol;Acc:MGI:1916323]	1.81869	0.899051	12.0933	0.000506037	0.00567427
1120	ENSMUSG00000037610.15	ENSMUSG00000037610	Kcnmb2	protein_coding	3	31902507	32200180	potassium large conductance calcium-activated channel, subfamily M, beta member 2 [Source:MGI Symbol;Acc:MGI:1919663]	6.55566	-1.50688	31.5856	1.90836e-08	6.4858e-07
1121	ENSMUSG00000037621.8	ENSMUSG00000037621	Atoh8	protein_coding	6	72206177	72235577	atonal bHLH transcription factor 8 [Source:MGI Symbol;Acc:MGI:1918343]	2.22632	0.073289	15.4352	8.53829e-05	0.00123727
1122	ENSMUSG00000037649.9	ENSMUSG00000037649	H2-DMa	protein_coding	17	34135182	34139101	histocompatibility 2, class II, locus DMa [Source:MGI Symbol;Acc:MGI:95921]	-0.937554	6.30665	12.2426	0.000467109	0.00528873
1123	ENSMUSG00000037681.13	ENSMUSG00000037681	Esyt3	protein_coding	9	99309963	99358557	extended synaptotagmin-like protein 3 [Source:MGI Symbol;Acc:MGI:1098699]	1.619	0.427401	11.4612	0.000710637	0.00761865
1124	ENSMUSG00000037683.14	ENSMUSG00000037683	Armc3	protein_coding	2	19199302	19310241	armadillo repeat containing 3 [Source:MGI Symbol;Acc:MGI:1918132]	-1.46159	1.56716	9.77463	0.00176937	0.0162782
1125	ENSMUSG00000037708.16	ENSMUSG00000037708	Spag6	protein_coding	2	18694032	18750413	sperm associated antigen 6 [Source:MGI Symbol;Acc:MGI:3040687]	4.14809	2.74784	41.6289	1.10349e-10	5.47043e-09
1126	ENSMUSG00000037725.8	ENSMUSG00000037725	Ckap2	protein_coding	8	22168160	22185819	cytoskeleton associated protein 2 [Source:MGI Symbol;Acc:MGI:1931797]	-0.718732	5.07852	8.27254	0.00402492	0.0315673
1127	ENSMUSG00000037736.18	ENSMUSG00000037736	Limch1	protein_coding	5	66745827	67057158	LIM and calponin homology domains 1 [Source:MGI Symbol;Acc:MGI:1924819]	-2.46779	-1.27355	11.1143	0.00085664	0.00892277
1128	ENSMUSG00000037754.13	ENSMUSG00000037754	Ppp1r16b	protein_coding	2	158665398	158766334	protein phosphatase 1, regulatory subunit 16B [Source:MGI Symbol;Acc:MGI:2151841]	2.07517	6.36826	44.7256	2.26675e-11	1.25945e-09
1129	ENSMUSG00000037820.15	ENSMUSG00000037820	Tgm2	protein_coding	2	158116402	158146436	transglutaminase 2, C polypeptide [Source:MGI Symbol;Acc:MGI:98731]	0.870459	6.18019	7.92977	0.0048628	0.0364341
1130	ENSMUSG00000037902.18	ENSMUSG00000037902	Sirpa	protein_coding	2	129592835	129632228	signal-regulatory protein alpha [Source:MGI Symbol;Acc:MGI:108563]	0.992549	6.50144	12.7273	0.000360362	0.00426059
1131	ENSMUSG00000037922.13	ENSMUSG00000037922	Bank1	protein_coding	3	136053363	136326066	B cell scaffold protein with ankyrin repeats 1 [Source:MGI Symbol;Acc:MGI:2442120]	1.56127	3.29457	13.3365	0.00026029	0.00322186
1132	ENSMUSG00000037935.16	ENSMUSG00000037935	Smarce1	protein_coding	11	99209047	99231017	SWI/SNF related, matrix associated, actin dependent regulator of chromatin, subfamily e, member 1 [Source:MGI Symbol;Acc:MGI:1927347]	-0.621997	6.27756	8.40073	0.00375071	0.0299391
1133	ENSMUSG00000037979.13	ENSMUSG00000037979	Ccdc92	protein_coding	5	124834418	124862424	coiled-coil domain containing 92 [Source:MGI Symbol;Acc:MGI:106485]	1.50484	1.74391	12.5861	0.000388617	0.00454305
1134	ENSMUSG00000037991.9	ENSMUSG00000037991	Rmi2	protein_coding	16	10835059	10892966	RecQ mediated genome instability 2 [Source:MGI Symbol;Acc:MGI:2685383]	-0.836931	4.35019	7.56461	0.00595256	0.0427581
1135	ENSMUSG00000037994.14	ENSMUSG00000037994	Slc9b2	protein_coding	3	135307700	135345387	solute carrier family 9, subfamily B (NHA2, cation proton antiporter 2), member 2 [Source:MGI Symbol;Acc:MGI:2140077]	-2.08652	1.07363	24.4558	7.60355e-07	1.89657e-05
1136	ENSMUSG00000038010.9	ENSMUSG00000038010	Ccdc138	protein_coding	10	58497948	58576244	coiled-coil domain containing 138 [Source:MGI Symbol;Acc:MGI:1923388]	-0.900712	3.43002	7.97046	0.00475468	0.0357868
1137	ENSMUSG00000038011.15	ENSMUSG00000038011	Dnah10	protein_coding	5	124725085	124834308	dynein, axonemal, heavy chain 10 [Source:MGI Symbol;Acc:MGI:1860299]	2.31177	-1.38018	9.24451	0.00236203	0.0206456
1138	ENSMUSG00000038020.5	ENSMUSG00000038020	Rapgefl1	protein_coding	11	98836785	98853697	Rap guanine nucleotide exchange factor (GEF)-like 1 [Source:MGI Symbol;Acc:MGI:3611446]	1.35209	2.14322	13.3455	0.000259047	0.00321654
1139	ENSMUSG00000038022.11	ENSMUSG00000038022	Mindy4	protein_coding	6	55203383	55320222	MINDY lysine 48 deubiquitinase 4 [Source:MGI Symbol;Acc:MGI:3583959]	-1.07965	2.98816	8.54458	0.00346552	0.028061
1140	ENSMUSG00000038037.5	ENSMUSG00000038037	Socs1	protein_coding	16	10782240	10785536	suppressor of cytokine signaling 1 [Source:MGI Symbol;Acc:MGI:1354910]	1.17654	3.61745	12.9464	0.000320546	0.00385434
1141	ENSMUSG00000038058.14	ENSMUSG00000038058	Nod1	protein_coding	6	54923949	54972612	nucleotide-binding oligomerization domain containing 1 [Source:MGI Symbol;Acc:MGI:1341839]	0.757008	5.22339	9.47299	0.00208519	0.0186812
1142	ENSMUSG00000038059.6	ENSMUSG00000038059	Smim3	protein_coding	18	60474193	60501983	small integral membrane protein 3 [Source:MGI Symbol;Acc:MGI:1917088]	-1.11542	5.34867	12.467	0.000414198	0.00479128
1143	ENSMUSG00000038074.16	ENSMUSG00000038074	Fkbp14	protein_coding	6	54577604	54597308	FK506 binding protein 14 [Source:MGI Symbol;Acc:MGI:2387639]	1.04989	2.18623	8.23308	0.00411338	0.0321591
1144	ENSMUSG00000038128.6	ENSMUSG00000038128	Camk4	protein_coding	18	32939041	33195767	calcium/calmodulin-dependent protein kinase IV [Source:MGI Symbol;Acc:MGI:88258]	1.15123	2.81154	7.69678	0.00553193	0.0403585
1145	ENSMUSG00000038143.16	ENSMUSG00000038143	Stox2	protein_coding	8	47180048	47446362	storkhead box 2 [Source:MGI Symbol;Acc:MGI:1918319]	1.44135	1.68808	10.7513	0.00104204	0.0104894
1146	ENSMUSG00000038151.13	ENSMUSG00000038151	Prdm1	protein_coding	10	44437177	44528501	PR domain containing 1, with ZNF domain [Source:MGI Symbol;Acc:MGI:99655]	3.83434	5.79393	59.2723	1.37294e-14	1.1556e-12
1147	ENSMUSG00000038156.16	ENSMUSG00000038156	Spon1	protein_coding	7	113765998	114043370	spondin 1, (f-spondin) extracellular matrix protein [Source:MGI Symbol;Acc:MGI:2385287]	3.10455	3.7267	35.7294	2.26712e-09	9.15176e-08
1148	ENSMUSG00000038170.15	ENSMUSG00000038170	Pde4dip	protein_coding	3	97689824	97888707	phosphodiesterase 4D interacting protein (myomegalin) [Source:MGI Symbol;Acc:MGI:1891434]	1.21662	5.13528	22.713	1.88094e-06	4.31113e-05
1149	ENSMUSG00000038172.14	ENSMUSG00000038172	Ttc39b	protein_coding	4	83220300	83324255	tetratricopeptide repeat domain 39B [Source:MGI Symbol;Acc:MGI:1917113]	1.14599	5.83301	22.1882	2.47193e-06	5.39082e-05
1150	ENSMUSG00000038173.15	ENSMUSG00000038173	Enpp6	protein_coding	8	46986887	47096762	ectonucleotide pyrophosphatase/phosphodiesterase 6 [Source:MGI Symbol;Acc:MGI:2445171]	-1.88086	0.107051	11.8379	0.000580378	0.00639192
1151	ENSMUSG00000038179.13	ENSMUSG00000038179	Slamf7	protein_coding	1	171632403	171653035	SLAM family member 7 [Source:MGI Symbol;Acc:MGI:1922595]	3.0657	5.93594	32.2054	1.38704e-08	4.85586e-07
1152	ENSMUSG00000038181.16	ENSMUSG00000038181	Chpf2	protein_coding	5	24586741	24594556	chondroitin polymerizing factor 2 [Source:MGI Symbol;Acc:MGI:1917522]	0.70532	5.49154	7.56439	0.00595327	0.0427581
1153	ENSMUSG00000038209.12	ENSMUSG00000038209	Itln1	protein_coding	1	171518122	171535294	intelectin 1 (galactofuranose binding) [Source:MGI Symbol;Acc:MGI:1333831]	9.8556	1.03047	130.912	2.58799e-30	9.30736e-28
1154	ENSMUSG00000038213.7	ENSMUSG00000038213	Tapbpl	protein_coding	6	125223933	125231860	TAP binding protein-like [Source:MGI Symbol;Acc:MGI:2384853]	0.797755	5.96088	11.3829	0.000741241	0.00789115
1155	ENSMUSG00000038218.3	ENSMUSG00000038218	Gm9765	unprocessed_pseudogene	1	171515233	171516922	predicted gene 9765 [Source:MGI Symbol;Acc:MGI:3642721]	6.61461	-1.66321	37.0415	1.1564e-09	4.92967e-08
1156	ENSMUSG00000038244.14	ENSMUSG00000038244	Mical2	protein_coding	7	112225856	112413106	microtubule associated monooxygenase, calponin and LIM domain containing 2 [Source:MGI Symbol;Acc:MGI:2444947]	1.38668	3.16373	13.0925	0.000296479	0.00360439
1157	ENSMUSG00000038280.12	ENSMUSG00000038280	Ostm1	protein_coding	10	42583822	42702459	osteopetrosis associated transmembrane protein 1 [Source:MGI Symbol;Acc:MGI:2655574]	0.64846	5.29839	8.47441	0.00360178	0.0290078
1158	ENSMUSG00000038301.15	ENSMUSG00000038301	Snx10	protein_coding	6	51523901	51590679	sorting nexin 10 [Source:MGI Symbol;Acc:MGI:1919232]	-0.838967	6.23003	14.1109	0.000172345	0.0022621
1159	ENSMUSG00000038304.14	ENSMUSG00000038304	Cd160	protein_coding	3	96798763	96829351	CD160 antigen [Source:MGI Symbol;Acc:MGI:1860383]	2.31288	3.05843	23.8484	1.04226e-06	2.51721e-05
1160	ENSMUSG00000038312.10	ENSMUSG00000038312	Edem2	protein_coding	2	155701677	155729475	ER degradation enhancer, mannosidase alpha-like 2 [Source:MGI Symbol;Acc:MGI:1915540]	0.957097	7.45599	9.51352	0.00203964	0.0183299
1161	ENSMUSG00000038319.14	ENSMUSG00000038319	Kcnh2	protein_coding	5	24319589	24351604	potassium voltage-gated channel, subfamily H (eag-related), member 2 [Source:MGI Symbol;Acc:MGI:1341722]	-1.31931	3.351	16.3051	5.39193e-05	0.000822935
1162	ENSMUSG00000038354.13	ENSMUSG00000038354	Ankrd35	protein_coding	3	96670131	96691032	ankyrin repeat domain 35 [Source:MGI Symbol;Acc:MGI:2442590]	1.7423	-0.762555	13.238	0.000274332	0.00336619
1163	ENSMUSG00000038370.6	ENSMUSG00000038370	Pcp4l1	protein_coding	1	171173262	171196268	Purkinje cell protein 4-like 1 [Source:MGI Symbol;Acc:MGI:1913675]	-1.68075	4.65137	27.1615	1.87147e-07	5.33397e-06
1164	ENSMUSG00000038371.15	ENSMUSG00000038371	Sbf2	protein_coding	7	110308013	110614922	SET binding factor 2 [Source:MGI Symbol;Acc:MGI:1921831]	1.03334	3.21654	9.01737	0.00267426	0.0227906
1165	ENSMUSG00000038375.15	ENSMUSG00000038375	Trp53inp2	protein_coding	2	155381059	155389850	transformation related protein 53 inducible nuclear protein 2 [Source:MGI Symbol;Acc:MGI:1915978]	1.32188	4.48998	7.62795	0.00574707	0.0415486
1166	ENSMUSG00000038421.13	ENSMUSG00000038421	Fcrla	protein_coding	1	170917576	170927583	Fc receptor-like A [Source:MGI Symbol;Acc:MGI:2138647]	2.52146	5.30813	18.4148	1.77677e-05	0.000311564
1167	ENSMUSG00000038425.17	ENSMUSG00000038425	Poli	protein_coding	18	70508680	70530620	polymerase (DNA directed), iota [Source:MGI Symbol;Acc:MGI:1347081]	-0.556304	5.40726	7.52457	0.00608632	0.0434926
1168	ENSMUSG00000038456.9	ENSMUSG00000038456	Dennd2a	protein_coding	6	39462378	39557867	DENN/MADD domain containing 2A [Source:MGI Symbol;Acc:MGI:2444961]	0.950553	3.64217	9.45451	0.0021063	0.0188093
1169	ENSMUSG00000038463.8	ENSMUSG00000038463	Olfml2b	protein_coding	1	170644532	170682789	olfactomedin-like 2B [Source:MGI Symbol;Acc:MGI:2443310]	-4.72418	1.50846	28.7179	8.37256e-08	2.54392e-06
1170	ENSMUSG00000038530.11	ENSMUSG00000038530	Rgs4	protein_coding	1	169741477	169747642	regulator of G-protein signaling 4 [Source:MGI Symbol;Acc:MGI:108409]	4.59662	-2.76977	7.38253	0.00658606	0.0463273
1171	ENSMUSG00000038630.8	ENSMUSG00000038630	Zkscan16	protein_coding	4	58943628	58958355	zinc finger with KRAB and SCAN domains 16 [Source:MGI Symbol;Acc:MGI:3510405]	3.19212	-1.7645	13.3924	0.000252648	0.00315093
1172	ENSMUSG00000038633.5	ENSMUSG00000038633	Degs1	protein_coding	1	182275772	182282804	delta(4)-desaturase, sphingolipid 1 [Source:MGI Symbol;Acc:MGI:1097711]	1.01081	5.73957	11.6825	0.000630923	0.00689103
1173	ENSMUSG00000038642.10	ENSMUSG00000038642	Ctss	protein_coding	3	95526786	95556403	cathepsin S [Source:MGI Symbol;Acc:MGI:107341]	1.92986	7.49492	20.139	7.20124e-06	0.000140335
1174	ENSMUSG00000038648.5	ENSMUSG00000038648	Creb3l2	protein_coding	6	37327255	37442146	cAMP responsive element binding protein 3-like 2 [Source:MGI Symbol;Acc:MGI:2442695]	1.68275	6.73391	32.6137	1.12422e-08	4.02846e-07
1175	ENSMUSG00000038677.14	ENSMUSG00000038677	Scube3	protein_coding	17	28142141	28174854	signal peptide, CUB domain, EGF-like 3 [Source:MGI Symbol;Acc:MGI:3045253]	-3.49809	3.90447	64.4506	9.89844e-16	9.55078e-14
1176	ENSMUSG00000038725.13	ENSMUSG00000038725	Pkhd1l1	protein_coding	15	44457494	44601369	polycystic kidney and hepatic disease 1-like 1 [Source:MGI Symbol;Acc:MGI:2183153]	1.38259	3.29226	7.855	0.00506804	0.0375875
1177	ENSMUSG00000038738.15	ENSMUSG00000038738	Shank1	protein_coding	7	44310253	44360572	SH3 and multiple ankyrin repeat domains 1 [Source:MGI Symbol;Acc:MGI:3613677]	1.96417	2.72047	20.8391	4.99518e-06	9.98026e-05
1178	ENSMUSG00000038793.8	ENSMUSG00000038793	Lefty1	protein_coding	1	180935022	180938400	left right determination factor 1 [Source:MGI Symbol;Acc:MGI:107405]	-1.25933	0.748433	9.02678	0.00266053	0.0226931
1179	ENSMUSG00000038797.13	ENSMUSG00000038797	Zscan2	protein_coding	7	80860920	80876537	zinc finger and SCAN domain containing 2 [Source:MGI Symbol;Acc:MGI:99176]	-0.956653	4.46157	11.5764	0.000667938	0.00724331
1180	ENSMUSG00000038807.18	ENSMUSG00000038807	Rap1gap2	protein_coding	11	74383356	74610915	RAP1 GTPase activating protein 2 [Source:MGI Symbol;Acc:MGI:3028623]	1.60628	4.57512	13.2809	0.00026813	0.00331268
1181	ENSMUSG00000038828.13	ENSMUSG00000038828	Tmem214	protein_coding	5	30868012	30879180	transmembrane protein 214 [Source:MGI Symbol;Acc:MGI:1916046]	0.957924	6.32907	14.0014	0.000182677	0.0023772
1182	ENSMUSG00000038894.7	ENSMUSG00000038894	Irs2	protein_coding	8	10984681	11008458	insulin receptor substrate 2 [Source:MGI Symbol;Acc:MGI:109334]	1.50789	6.87396	19.4907	1.01091e-05	0.000188462
1183	ENSMUSG00000038949.8	ENSMUSG00000038949	Cnst	protein_coding	1	179546370	179627478	consortin, connexin sorting protein [Source:MGI Symbol;Acc:MGI:2445141]	0.851464	5.97929	13.2746	0.00026903	0.00331553
1184	ENSMUSG00000038954.14	ENSMUSG00000038954	Supt3	protein_coding	17	44777152	45119290	suppressor of Ty 3 [Source:MGI Symbol;Acc:MGI:1923723]	-0.913366	4.33394	9.32065	0.00226585	0.0199459
1185	ENSMUSG00000038991.17	ENSMUSG00000038991	Txndc5	protein_coding	13	38500079	38528824	thioredoxin domain containing 5 [Source:MGI Symbol;Acc:MGI:2145316]	2.87178	10.1224	21.6334	3.30062e-06	6.95274e-05
1186	ENSMUSG00000039004.6	ENSMUSG00000039004	Bmp6	protein_coding	13	38345107	38500302	bone morphogenetic protein 6 [Source:MGI Symbol;Acc:MGI:88182]	3.07398	3.08034	18.7196	1.51414e-05	0.000271284
1187	ENSMUSG00000039037.5	ENSMUSG00000039037	St6galnac5	protein_coding	3	152817081	152982246	ST6 (alpha-N-acetyl-neuraminyl-2,3-beta-galactosyl-1,3)-N-acetylgalactosaminide alpha-2,6-sialyltransferase 5 [Source:MGI Symbol;Acc:MGI:1349471]	3.19866	2.36774	65.4623	5.92366e-16	6.07098e-14
1188	ENSMUSG00000039081.10	ENSMUSG00000039081	Zfp503	protein_coding	14	21983959	21989601	zinc finger protein 503 [Source:MGI Symbol;Acc:MGI:1353644]	1.42272	2.41724	14.798	0.000119659	0.00164708
1189	ENSMUSG00000039109.16	ENSMUSG00000039109	F13a1	protein_coding	13	36867178	37050244	coagulation factor XIII, A1 subunit [Source:MGI Symbol;Acc:MGI:1921395]	2.20539	5.46478	14.5314	0.000137839	0.00185726
1190	ENSMUSG00000039167.11	ENSMUSG00000039167	Adgrl4	protein_coding	3	151437887	151545086	adhesion G protein-coupled receptor L4 [Source:MGI Symbol;Acc:MGI:2655562]	-1.72204	8.29429	24.7455	6.54214e-07	1.65902e-05
1191	ENSMUSG00000039191.12	ENSMUSG00000039191	Rbpj	protein_coding	5	53466152	53657362	recombination signal binding protein for immunoglobulin kappa J region [Source:MGI Symbol;Acc:MGI:96522]	-0.636426	5.22132	9.76439	0.00177924	0.0163538
1192	ENSMUSG00000039234.11	ENSMUSG00000039234	Sec24d	protein_coding	3	123267455	123365641	Sec24 related gene family, member D (S. cerevisiae) [Source:MGI Symbol;Acc:MGI:1916858]	1.26978	5.81021	20.8436	4.98356e-06	9.96713e-05
1193	ENSMUSG00000039239.14	ENSMUSG00000039239	Tgfb2	protein_coding	1	186622792	186705989	transforming growth factor, beta 2 [Source:MGI Symbol;Acc:MGI:98726]	2.69795	1.17609	22.525	2.07427e-06	4.67301e-05
1194	ENSMUSG00000039269.5	ENSMUSG00000039269	2300002M23Rik	protein_coding	17	35567450	35568952	RIKEN cDNA 2300002M23 gene [Source:MGI Symbol;Acc:MGI:1916792]	5.5771	1.78117	52.3908	4.54849e-13	3.14577e-11
1195	ENSMUSG00000039270.9	ENSMUSG00000039270	Megf9	protein_coding	4	70427065	70534995	multiple EGF-like-domains 9 [Source:MGI Symbol;Acc:MGI:1918264]	1.1572	4.87377	7.7563	0.00535254	0.0393449
1196	ENSMUSG00000039286.12	ENSMUSG00000039286	Fndc3b	protein_coding	3	27416162	27711307	fibronectin type III domain containing 3B [Source:MGI Symbol;Acc:MGI:1919257]	2.68805	6.26729	66.9875	2.73239e-16	2.8902e-14
1197	ENSMUSG00000039315.15	ENSMUSG00000039315	Clnk	protein_coding	5	38706462	38876812	cytokine-dependent hematopoietic cell linker [Source:MGI Symbol;Acc:MGI:1351468]	-0.791317	4.16002	8.01261	0.00464527	0.0350968
1198	ENSMUSG00000039395.8	ENSMUSG00000039395	Mreg	protein_coding	1	72159442	72212307	melanoregulin [Source:MGI Symbol;Acc:MGI:2151839]	2.36257	0.748768	17.6828	2.60976e-05	0.000435622
1199	ENSMUSG00000039457.4	ENSMUSG00000039457	Ppl	protein_coding	16	5086291	5132421	periplakin [Source:MGI Symbol;Acc:MGI:1194898]	2.67039	0.416628	20.8877	4.87004e-06	9.78958e-05
1200	ENSMUSG00000039474.13	ENSMUSG00000039474	Wfs1	protein_coding	5	36966104	36989205	wolframin ER transmembrane glycoprotein [Source:MGI Symbol;Acc:MGI:1328355]	2.08672	4.4748	47.63	5.14755e-12	3.18183e-10
1201	ENSMUSG00000039497.8	ENSMUSG00000039497	Dse	protein_coding	10	34151393	34207715	dermatan sulfate epimerase [Source:MGI Symbol;Acc:MGI:2443455]	2.43276	2.42744	33.9585	5.63014e-09	2.11317e-07
1202	ENSMUSG00000039512.12	ENSMUSG00000039512	Uhrf1bp1	protein_coding	17	27856441	27900041	UHRF1 (ICBP90) binding protein 1 [Source:MGI Symbol;Acc:MGI:3041238]	0.666458	5.64448	8.70222	0.00317824	0.0262158
1203	ENSMUSG00000039518.7	ENSMUSG00000039518	Cdsn	protein_coding	17	35552128	35557180	corneodesmosin [Source:MGI Symbol;Acc:MGI:3505689]	7.77192	-0.516084	44.7979	2.18462e-11	1.21723e-09
1204	ENSMUSG00000039578.17	ENSMUSG00000039578	Ccser1	protein_coding	6	61180324	62382865	coiled-coil serine rich 1 [Source:MGI Symbol;Acc:MGI:3045354]	-1.49676	2.67055	14.5729	0.000134839	0.00182679
1205	ENSMUSG00000039601.16	ENSMUSG00000039601	Rcan2	protein_coding	17	43801351	44039516	regulator of calcineurin 2 [Source:MGI Symbol;Acc:MGI:1858219]	4.82583	2.18903	74.322	6.63588e-18	8.52323e-16
1206	ENSMUSG00000039629.14	ENSMUSG00000039629	Strip2	protein_coding	6	29917012	29959681	striatin interacting protein 2 [Source:MGI Symbol;Acc:MGI:2444363]	1.39526	2.40222	10.8824	0.000970803	0.00989515
1207	ENSMUSG00000039652.16	ENSMUSG00000039652	Cpeb3	protein_coding	19	37021291	37208601	cytoplasmic polyadenylation element binding protein 3 [Source:MGI Symbol;Acc:MGI:2443075]	3.53111	4.83866	58.4872	2.04617e-14	1.67939e-12
1208	ENSMUSG00000039706.11	ENSMUSG00000039706	Ldb2	protein_coding	5	44472132	44799680	LIM domain binding 2 [Source:MGI Symbol;Acc:MGI:894670]	2.1178	0.462693	15.6683	7.54767e-05	0.00110916
1209	ENSMUSG00000039782.14	ENSMUSG00000039782	Cpeb2	protein_coding	5	43233170	43289724	cytoplasmic polyadenylation element binding protein 2 [Source:MGI Symbol;Acc:MGI:2442640]	1.77609	5.59525	21.6219	3.32044e-06	6.98706e-05
1210	ENSMUSG00000039814.15	ENSMUSG00000039814	Xkr5	protein_coding	8	18932729	18950975	X-linked Kx blood group related 5 [Source:MGI Symbol;Acc:MGI:2442327]	-2.17724	3.17054	34.761	3.72774e-09	1.46009e-07
1211	ENSMUSG00000039851.11	ENSMUSG00000039851	4932438H23Rik	protein_coding	16	91053935	91095122	RIKEN cDNA 4932438H23 gene [Source:MGI Symbol;Acc:MGI:1921637]	-2.81367	-2.04391	11.062	0.000881163	0.0091397
1212	ENSMUSG00000039908.14	ENSMUSG00000039908	Slc26a11	protein_coding	11	119355557	119381079	solute carrier family 26, member 11 [Source:MGI Symbol;Acc:MGI:2444589]	-1.5323	4.39028	34.1003	5.23438e-09	1.98726e-07
1213	ENSMUSG00000039934.12	ENSMUSG00000039934	Gsap	protein_coding	5	21186255	21315132	gamma-secretase activating protein [Source:MGI Symbol;Acc:MGI:2442259]	0.786146	4.60822	8.19711	0.00419571	0.032648
1214	ENSMUSG00000039963.18	ENSMUSG00000039963	Ccdc40	protein_coding	11	119228572	119265236	coiled-coil domain containing 40 [Source:MGI Symbol;Acc:MGI:2443893]	-1.97588	3.07248	30.1828	3.93171e-08	1.2666e-06
1215	ENSMUSG00000039981.6	ENSMUSG00000039981	Zc3h12d	protein_coding	10	7832470	7870396	zinc finger CCCH type containing 12D [Source:MGI Symbol;Acc:MGI:3045313]	2.09301	4.49388	29.4431	5.75841e-08	1.79372e-06
1216	ENSMUSG00000039989.7	ENSMUSG00000039989	Cbx4	protein_coding	11	119077573	119086221	chromobox 4 [Source:MGI Symbol;Acc:MGI:1195985]	0.633353	6.25707	9.43946	0.00212366	0.0189557
1217	ENSMUSG00000039994.15	ENSMUSG00000039994	Timeless	protein_coding	10	128232065	128252941	timeless circadian clock 1 [Source:MGI Symbol;Acc:MGI:1321393]	-0.839595	6.54802	14.2419	0.000160753	0.00212689
1218	ENSMUSG00000040035.14	ENSMUSG00000040035	Disp2	protein_coding	2	118779719	118811293	dispatched RND tramsporter family member 2 [Source:MGI Symbol;Acc:MGI:2388733]	6.41321	1.1337	82.4168	1.10214e-19	1.66415e-17
1219	ENSMUSG00000040037.13	ENSMUSG00000040037	Negr1	protein_coding	3	156561794	157316445	neuronal growth regulator 1 [Source:MGI Symbol;Acc:MGI:2444846]	4.63634	1.97368	61.8673	3.67392e-15	3.28824e-13
1220	ENSMUSG00000040093.15	ENSMUSG00000040093	Bmf	protein_coding	2	118528757	118549687	BCL2 modifying factor [Source:MGI Symbol;Acc:MGI:2176433]	1.55611	4.22943	20.2685	6.72989e-06	0.00013193
1221	ENSMUSG00000040147.14	ENSMUSG00000040147	Maob	protein_coding	X	16709282	16817366	monoamine oxidase B [Source:MGI Symbol;Acc:MGI:96916]	4.96636	1.55601	78.9961	6.22329e-19	8.66877e-17
1222	ENSMUSG00000040152.8	ENSMUSG00000040152	Thbs1	protein_coding	2	118111876	118127133	thrombospondin 1 [Source:MGI Symbol;Acc:MGI:98737]	1.78976	6.66623	12.7505	0.00035592	0.00421816
1223	ENSMUSG00000040254.11	ENSMUSG00000040254	Sema3d	protein_coding	5	12383385	12588948	sema domain, immunoglobulin domain (Ig), short basic domain, secreted, (semaphorin) 3D [Source:MGI Symbol;Acc:MGI:1860118]	-1.99991	3.39672	14.8605	0.000115763	0.00160574
1224	ENSMUSG00000040264.10	ENSMUSG00000040264	Gbp2b	protein_coding	3	142594847	142619179	guanylate binding protein 2b [Source:MGI Symbol;Acc:MGI:95666]	4.18083	-0.80807	37.5702	8.8181e-10	3.8419e-08
1225	ENSMUSG00000040268.17	ENSMUSG00000040268	Plekha1	protein_coding	7	130865756	130913312	pleckstrin homology domain containing, family A (phosphoinositide binding specific) member 1 [Source:MGI Symbol;Acc:MGI:2442213]	0.918145	5.59317	15.0176	0.000106515	0.00149742
1226	ENSMUSG00000040272.14	ENSMUSG00000040272	Accs	protein_coding	2	93833467	93849943	1-aminocyclopropane-1-carboxylate synthase (non-functional) [Source:MGI Symbol;Acc:MGI:1919717]	-0.579786	5.3985	7.5023	0.00616202	0.0439224
1227	ENSMUSG00000040280.10	ENSMUSG00000040280	Ndufa4l2	protein_coding	10	127514967	127517154	Ndufa4, mitochondrial complex associated like 2 [Source:MGI Symbol;Acc:MGI:3039567]	2.33764	-0.422574	7.53845	0.0060396	0.0432056
1228	ENSMUSG00000040287.9	ENSMUSG00000040287	Stac3	protein_coding	10	127501686	127508823	SH3 and cysteine rich domain 3 [Source:MGI Symbol;Acc:MGI:3606571]	-1.38248	1.96593	8.87161	0.00289639	0.0243211
1229	ENSMUSG00000040310.12	ENSMUSG00000040310	Alx4	protein_coding	2	93642384	93681339	aristaless-like homeobox 4 [Source:MGI Symbol;Acc:MGI:108359]	6.83111	0.273669	82.5112	1.05073e-19	1.61894e-17
1230	ENSMUSG00000040312.14	ENSMUSG00000040312	Cchcr1	protein_coding	17	35517100	35531015	coiled-coil alpha-helical rod protein 1 [Source:MGI Symbol;Acc:MGI:2385321]	-0.612599	5.31492	8.06784	0.00450579	0.0343182
1231	ENSMUSG00000040314.2	ENSMUSG00000040314	Ctsg	protein_coding	14	56099881	56102574	cathepsin G [Source:MGI Symbol;Acc:MGI:88563]	1.45236	6.01697	7.85814	0.00505925	0.0375505
1232	ENSMUSG00000040328.15	ENSMUSG00000040328	Olfr56	protein_coding	11	48978889	49135387	olfactory receptor 56 [Source:MGI Symbol;Acc:MGI:1333785]	-2.28584	0.822638	23.0199	1.60332e-06	3.74422e-05
1233	ENSMUSG00000040340.13	ENSMUSG00000040340	Tex45	protein_coding	8	3470862	3487181	testis expressed 45 [Source:MGI Symbol;Acc:MGI:1923656]	-3.16445	-0.589732	9.77507	0.00176894	0.0162782
1234	ENSMUSG00000040359.14	ENSMUSG00000040359	Ufl1	protein_coding	4	25248600	25281821	UFM1 specific ligase 1 [Source:MGI Symbol;Acc:MGI:1914740]	0.774144	5.88324	13.0029	0.000311014	0.00374657
1235	ENSMUSG00000040372.2	ENSMUSG00000040372	Gpr63	protein_coding	4	24966407	25009233	G protein-coupled receptor 63 [Source:MGI Symbol;Acc:MGI:2135884]	1.99735	-0.79555	11.0516	0.000886096	0.00918605
1236	ENSMUSG00000040387.16	ENSMUSG00000040387	Klhl32	protein_coding	4	24612554	24851124	kelch-like 32 [Source:MGI Symbol;Acc:MGI:3612790]	-1.96798	-0.9698	8.23021	0.00411987	0.0321782
1237	ENSMUSG00000040471.17	ENSMUSG00000040471	Ggt6	protein_coding	11	72435526	72438400	gamma-glutamyltransferase 6 [Source:MGI Symbol;Acc:MGI:1918772]	-3.00092	-0.695054	10.2208	0.00138866	0.013263
1238	ENSMUSG00000040488.17	ENSMUSG00000040488	Ltbp4	protein_coding	7	27305136	27337692	latent transforming growth factor beta binding protein 4 [Source:MGI Symbol;Acc:MGI:1321395]	1.22728	3.38407	14.2145	0.000163109	0.00215518
1239	ENSMUSG00000040502.5	ENSMUSG00000040502	43533	protein_coding	10	127055011	127060184	membrane-associated ring finger (C3HC4) 9 [Source:MGI Symbol;Acc:MGI:2446144]	1.09913	3.27507	10.3084	0.00132428	0.0128089
1240	ENSMUSG00000040522.5	ENSMUSG00000040522	Tlr8	protein_coding	X	167242696	167264329	toll-like receptor 8 [Source:MGI Symbol;Acc:MGI:2176887]	3.30733	1.02504	18.2924	1.89466e-05	0.000330188
1241	ENSMUSG00000040591.18	ENSMUSG00000040591	1110051M20Rik	protein_coding	2	91275068	91444704	RIKEN cDNA 1110051M20 gene [Source:MGI Symbol;Acc:MGI:1915079]	-0.885405	4.01034	9.70569	0.00183698	0.0167987
1242	ENSMUSG00000040592.11	ENSMUSG00000040592	Cd79b	protein_coding	11	106311341	106314762	CD79B antigen [Source:MGI Symbol;Acc:MGI:96431]	0.915597	5.92612	9.30692	0.0022829	0.0200604
1243	ENSMUSG00000040624.17	ENSMUSG00000040624	Plekhg1	protein_coding	10	3740364	3967303	pleckstrin homology domain containing, family G (with RhoGef domain) member 1 [Source:MGI Symbol;Acc:MGI:2676551]	1.18247	2.69214	8.89259	0.0028633	0.0241004
1244	ENSMUSG00000040658.7	ENSMUSG00000040658	Dnph1	protein_coding	17	46496711	46499624	2'-deoxynucleoside 5'-phosphate N-hydrolase 1 [Source:MGI Symbol;Acc:MGI:3039376]	-1.01	4.45893	8.11255	0.00439599	0.0337812
1245	ENSMUSG00000040717.6	ENSMUSG00000040717	Il17rd	protein_coding	14	27038941	27107286	interleukin 17 receptor D [Source:MGI Symbol;Acc:MGI:2159727]	3.21848	-0.939732	26.7323	2.33677e-07	6.49175e-06
1246	ENSMUSG00000040732.20	ENSMUSG00000040732	Erg	protein_coding	16	95359169	95586593	ETS transcription factor [Source:MGI Symbol;Acc:MGI:95415]	-0.767258	7.34144	7.22137	0.00720407	0.049676
1247	ENSMUSG00000040809.10	ENSMUSG00000040809	Chil3	protein_coding	3	106147554	106167564	chitinase-like 3 [Source:MGI Symbol;Acc:MGI:1330860]	-10.4355	6.26713	79.8688	4.00105e-19	5.69358e-17
1248	ENSMUSG00000040812.14	ENSMUSG00000040812	Agbl2	protein_coding	2	90782727	90834437	ATP/GTP binding protein-like 2 [Source:MGI Symbol;Acc:MGI:2443254]	3.4984	0.97956	11.2863	0.00078082	0.00824153
1249	ENSMUSG00000040855.15	ENSMUSG00000040855	Reps2	protein_coding	X	162411954	162643649	RALBP1 associated Eps domain containing protein 2 [Source:MGI Symbol;Acc:MGI:2663511]	1.32284	1.95451	9.15724	0.00247736	0.0214264
1250	ENSMUSG00000040860.16	ENSMUSG00000040860	Crocc	protein_coding	4	141016637	141060550	ciliary rootlet coiled-coil, rootletin [Source:MGI Symbol;Acc:MGI:3529431]	-0.642132	5.55174	8.7969	0.00301744	0.0251273
1251	ENSMUSG00000040896.16	ENSMUSG00000040896	Kcnd3	protein_coding	3	105452330	105674002	potassium voltage-gated channel, Shal-related family, member 3 [Source:MGI Symbol;Acc:MGI:1928743]	-4.1658	-0.118677	37.7241	8.14932e-10	3.58208e-08
1252	ENSMUSG00000040899.14	ENSMUSG00000040899	Ccr6	protein_coding	17	8236043	8257141	chemokine (C-C motif) receptor 6 [Source:MGI Symbol;Acc:MGI:1333797]	1.94039	0.949057	13.2431	0.000273588	0.00336123
1253	ENSMUSG00000041126.16	ENSMUSG00000041126	H2afv	protein_coding	11	6427229	6444443	H2A histone family, member V [Source:MGI Symbol;Acc:MGI:1924855]	-0.946894	6.42677	11.1387	0.000845454	0.00882019
1254	ENSMUSG00000041165.6	ENSMUSG00000041165	Spem1	protein_coding	11	69820876	69822180	sperm maturation 1 [Source:MGI Symbol;Acc:MGI:1921538]	-2.49937	-1.59194	9.72038	0.00182235	0.016688
1255	ENSMUSG00000041202.12	ENSMUSG00000041202	Pla2g2d	protein_coding	4	138775735	138782046	phospholipase A2, group IID [Source:MGI Symbol;Acc:MGI:1341796]	3.68451	-2.27234	14.9327	0.000111416	0.00155307
1256	ENSMUSG00000041235.12	ENSMUSG00000041235	Chd7	protein_coding	4	8690406	8867659	chromodomain helicase DNA binding protein 7 [Source:MGI Symbol;Acc:MGI:2444748]	1.49085	5.38703	11.7497	0.000608523	0.00667216
1257	ENSMUSG00000041301.15	ENSMUSG00000041301	Cftr	protein_coding	6	18170687	18322768	cystic fibrosis transmembrane conductance regulator [Source:MGI Symbol;Acc:MGI:88388]	2.04056	-0.439684	14.9458	0.000110646	0.00154516
1258	ENSMUSG00000041309.17	ENSMUSG00000041309	Nkx6-2	protein_coding	7	139579376	139582797	NK6 homeobox 2 [Source:MGI Symbol;Acc:MGI:1352738]	-5.58419	-2.18083	10.515	0.00118409	0.0116698
1259	ENSMUSG00000041329.13	ENSMUSG00000041329	Atp1b2	protein_coding	11	69599736	69605942	ATPase, Na+/K+ transporting, beta 2 polypeptide [Source:MGI Symbol;Acc:MGI:88109]	1.70532	3.20139	13.7864	0.000204813	0.00262724
1260	ENSMUSG00000041347.5	ENSMUSG00000041347	Bdkrb1	protein_coding	12	105603085	105605428	bradykinin receptor, beta 1 [Source:MGI Symbol;Acc:MGI:88144]	-6.78919	-1.6245	20.5561	5.79075e-06	0.000114656
1261	ENSMUSG00000041351.16	ENSMUSG00000041351	Rap1gap	protein_coding	4	137664726	137729861	Rap1 GTPase-activating protein [Source:MGI Symbol;Acc:MGI:109338]	1.15066	3.84146	8.22092	0.00414102	0.0322987
1262	ENSMUSG00000041360.7	ENSMUSG00000041360	Pum3	protein_coding	19	27388702	27429820	pumilio RNA-binding family member 3 [Source:MGI Symbol;Acc:MGI:106253]	-0.621776	6.42456	8.61875	0.00332721	0.0271726
1263	ENSMUSG00000041361.13	ENSMUSG00000041361	Myzap	protein_coding	9	71504347	71592360	myocardial zonula adherens protein [Source:MGI Symbol;Acc:MGI:2142908]	2.60001	2.82181	18.7065	1.52459e-05	0.000272908
[truncated: 1,606 more rows]

## Sheet: 5. CMP cells
Bone Marrow-Derived CMP cells from 'F1-Lupus vs F1-Prediseased Female Mice' (|FC|1.5, FDR<0.05)
[truncated: 908 more rows]
