# Supplementary material for: Transcriptome reprogramming and myeloid skewing in haematopoietic stem and progenitor cells in systemic lupus erythematosus
Source: Ann Rheum Dis. 2019 Nov 28;79(2):242–53. doi: 10.1136/annrheumdis-2019-215782 (PMC7025734; doi:10.1136/annrheumdis-2019-215782)
Supplement: Supplementary data [file annrheumdis-2019-215782supp003.xlsx]

## Sheet: GSEA_enrichment
'F1-Lupus vs F1-Prediseased LSK cells' :
NAME	SIZE	ES	NES	NOM p-val	FDR q-val	FWER p-val	RANK AT MAX
GO_ENZYME_ACTIVATOR_ACTIVITY	391	0.671067	1.38324	0	0.2589	1	2164
GO_REGULATION_OF_PROTEIN_SERINE_THREONINE_KINASE_ACTIVITY	403	0.671856	1.38953	0	0.257142	1	1727
GO_ENDOSOMAL_PART	344	0.674779	1.38536	0.00322234	0.256986	1	1476
GO_PURINE_NUCLEOBASE_METABOLIC_PROCESS	16	0.895425	1.38554	0.0311042	0.256913	1	669
GO_CALCIUM_MEDIATED_SIGNALING	64	0.766342	1.38587	0.0310479	0.256879	1	1335
GO_SYMPORTER_ACTIVITY	100	0.740509	1.38526	0.0173697	0.256677	1	1490
GO_MODIFIED_AMINO_ACID_BINDING	47	0.801909	1.38951	0.0244898	0.25646	1	1949
GO_SPHINGOLIPID_BIOSYNTHETIC_PROCESS	60	0.763971	1.38899	0.0513176	0.256406	1	1902
GO_VIRUS_RECEPTOR_ACTIVITY	57	0.774545	1.38582	0.0352782	0.256371	1	1877
GO_CELLULAR_RESPONSE_TO_PROSTAGLANDIN_E_STIMULUS	17	0.91427	1.38942	0.0259319	0.256102	1	1020
GO_POSITIVE_REGULATION_OF_NEUTROPHIL_MIGRATION	20	0.885171	1.3889	0.0283019	0.256053	1	1013
GO_ACTIN_CYTOSKELETON_REORGANIZATION	51	0.801876	1.38473	0.0283286	0.256044	1	1794
GO_REGULATION_OF_CYSTEINE_TYPE_ENDOPEPTIDASE_ACTIVITY_INVOLVED_IN_APOPTOTIC_SIGNALING_PATHWAY	21	0.861944	1.38493	0.0609756	0.255995	1	1675
GO_POSITIVE_REGULATION_OF_CELLULAR_PROTEIN_CATABOLIC_PROCESS	175	0.709588	1.38524	0.0128655	0.255987	1	432
GO_PEPTIDE_CATABOLIC_PROCESS	18	0.892381	1.38881	0.0229133	0.255704	1	720
GO_REGULATION_OF_CARBOHYDRATE_BIOSYNTHETIC_PROCESS	66	0.762155	1.38464	0.0309859	0.255667	1	871
GO_CLATHRIN_COATED_VESICLE	119	0.720769	1.39037	0.0133657	0.25564	1	1464
GO_ISOPRENOID_METABOLIC_PROCESS	80	0.75123	1.38836	0.0289093	0.255511	1	973
GO_RESPONSE_TO_PROGESTERONE	39	0.816628	1.38521	0.0257143	0.255372	1	1481
GO_REGULATION_OF_VASOCONSTRICTION	42	0.806536	1.38941	0.033046	0.255361	1	1267
GO_POSITIVE_REGULATION_OF_ACTIN_FILAMENT_POLYMERIZATION	53	0.788911	1.3842	0.0365682	0.255357	1	629
GO_REGULATION_OF_CELL_SUBSTRATE_ADHESION	141	0.714181	1.38639	0.0106007	0.255298	1	1283
GO_GTP_RHO_BINDING	15	0.914156	1.39063	0.0236967	0.255206	1	561
GO_MACROPHAGE_DIFFERENTIATION	18	0.884407	1.38876	0.0234375	0.255134	1	943
GO_REGULATION_OF_CELLULAR_SENESCENCE	23	0.868162	1.39245	0.0260337	0.25513	1	458
GO_RESPONSE_TO_X_RAY	28	0.844882	1.3846	0.0393701	0.255116	1	600
GO_APICAL_PLASMA_MEMBRANE	203	0.69021	1.39012	0.00563698	0.255114	1	1786
GO_POSITIVE_REGULATION_OF_PROTEIN_IMPORT	91	0.744744	1.39032	0.0252525	0.255036	1	2271
GO_ORGANIC_ACID_TRANSPORT	181	0.695362	1.38682	0.0116279	0.254948	1	1636
GO_RESPONSE_TO_ISOQUINOLINE_ALKALOID	21	0.870948	1.38447	0.0374251	0.254935	1	1065
GO_REGULATION_OF_CELL_AGING	28	0.839768	1.38833	0.0461309	0.254865	1	458
GO_REGULATION_OF_LIPID_BIOSYNTHETIC_PROCESS	96	0.742305	1.38801	0.0151515	0.254825	1	2009
GO_REGULATION_OF_COAGULATION	65	0.769817	1.39234	0.030303	0.25482	1	1975
GO_MONOCARBOXYLIC_ACID_TRANSPORT	86	0.745228	1.38669	0.0311688	0.254796	1	1636
GO_POSITIVE_REGULATION_OF_ADAPTIVE_IMMUNE_RESPONSE	64	0.775784	1.38866	0.0323887	0.254777	1	1700
GO_PHOTOTRANSDUCTION	27	0.846454	1.38821	0.0461997	0.254649	1	2152
GO_PROTEIN_KINASE_B_SIGNALING	30	0.83996	1.38706	0.0299401	0.254596	1	917
GO_ALCOHOL_CATABOLIC_PROCESS	41	0.809155	1.38794	0.0382979	0.254338	1	1375
GO_SPHINGOLIPID_METABOLIC_PROCESS	107	0.744251	1.39228	0.0114358	0.254238	1	1902
GO_APICAL_PART_OF_CELL	251	0.685972	1.38788	0.00662252	0.253823	1	1804
GO_REGULATION_OF_FATTY_ACID_BIOSYNTHETIC_PROCESS	28	0.853016	1.39627	0.0286145	0.253693	1	1852
GO_REGULATION_OF_STEM_CELL_PROLIFERATION	64	0.776032	1.39227	0.0308311	0.25347	1	757
GO_HYDROLASE_ACTIVITY_ACTING_ON_GLYCOSYL_BONDS	88	0.747314	1.38781	0.0129366	0.253378	1	1506
GO_FLAVIN_ADENINE_DINUCLEOTIDE_BINDING	64	0.772983	1.39305	0.0281501	0.253153	1	1599
KEGG_TOLL_LIKE_RECEPTOR_SIGNALING_PATHWAY	85	0.747589	1.39216	0.0257353	0.253104	1	1284
GO_INTERACTION_WITH_SYMBIONT	43	0.795226	1.38773	0.035461	0.253055	1	1854
GO_REGULATION_OF_LIPID_METABOLIC_PROCESS	212	0.693961	1.39622	0.00558036	0.252974	1	2047
GO_L_AMINO_ACID_TRANSMEMBRANE_TRANSPORTER_ACTIVITY	40	0.815169	1.39568	0.0321168	0.252843	1	2871
KEGG_PATHOGENIC_ESCHERICHIA_COLI_INFECTION	51	0.793866	1.3961	0.0247253	0.252621	1	1084
GO_RETINA_LAYER_FORMATION	15	0.904557	1.3921	0.0316957	0.252584	1	1322
GO_CELL_CHEMOTAXIS	120	0.716364	1.38768	0.0220318	0.252569	1	1687
GO_DORSAL_VENTRAL_AXIS_SPECIFICATION	15	0.904697	1.39693	0.0286678	0.252463	1	1298
GO_DEFENSE_RESPONSE_TO_GRAM_POSITIVE_BACTERIUM	46	0.809846	1.39558	0.0260989	0.252404	1	1233
GO_REGULATION_OF_FAT_CELL_DIFFERENTIATION	86	0.749655	1.39199	0.0202276	0.252248	1	1267
GO_NEGATIVE_REGULATION_OF_DEFENSE_RESPONSE	108	0.739946	1.39382	0.0172626	0.252199	1	1674
KEGG_FC_GAMMA_R_MEDIATED_PHAGOCYTOSIS	87	0.759415	1.396	0.0192061	0.252119	1	1727
GO_CARBOHYDRATE_CATABOLIC_PROCESS	84	0.74652	1.39147	0.0329531	0.252074	1	1765
GO_CELLULAR_GLUCOSE_HOMEOSTASIS	60	0.776156	1.39682	0.0275862	0.252062	1	858
GO_ORGANIC_ACID_SODIUM_SYMPORTER_ACTIVITY	20	0.88936	1.39172	0.0287879	0.251816	1	1224
GO_NEGATIVE_REGULATION_OF_NEURAL_PRECURSOR_CELL_PROLIFERATION	15	0.899283	1.39192	0.0455285	0.251769	1	190
GO_REGULATION_OF_CELLULAR_EXTRAVASATION	21	0.897505	1.39376	0.0141732	0.251657	1	1013
GO_REGULATION_OF_VESICLE_FUSION	53	0.786502	1.39357	0.0247934	0.251652	1	2255
GO_POSITIVE_REGULATION_OF_G1_S_TRANSITION_OF_MITOTIC_CELL_CYCLE	21	0.887643	1.39413	0.0275229	0.251613	1	1065
GO_RESPONSE_TO_INORGANIC_SUBSTANCE	376	0.679044	1.39557	0	0.251607	1	1458
GO_DEFENSE_RESPONSE_TO_FUNGUS	20	0.873984	1.39546	0.0330578	0.2513	1	248
GO_ORGANONITROGEN_COMPOUND_CATABOLIC_PROCESS	251	0.684584	1.39533	0.00333333	0.251126	1	1772
GO_CALCIUM_DEPENDENT_PROTEIN_BINDING	46	0.797402	1.39507	0.04039	0.250628	1	1933
GO_POSITIVE_REGULATION_OF_OXIDOREDUCTASE_ACTIVITY	35	0.817696	1.39452	0.0430416	0.250593	1	1310
GO_PHOSPHOLIPASE_C_ACTIVITY	25	0.853047	1.39531	0.0374813	0.250376	1	1296
GO_CADHERIN_BINDING	21	0.889742	1.39503	0.0270701	0.249914	1	835
GO_MITOCHONDRION_MORPHOGENESIS	18	0.906388	1.39495	0.0256	0.249536	1	467
GO_NEGATIVE_REGULATION_OF_IMMUNE_EFFECTOR_PROCESS	74	0.760311	1.39872	0.0208605	0.24649	1	1687
GO_RESPONSE_TO_PLATELET_DERIVED_GROWTH_FACTOR	17	0.922414	1.4002	0.00938967	0.245987	1	832
GO_POSITIVE_REGULATION_OF_LIPID_METABOLIC_PROCESS	98	0.741152	1.39872	0.0200501	0.24563	1	1917
GO_LATERAL_PLASMA_MEMBRANE	41	0.814465	1.40011	0.0256776	0.245458	1	967
GO_UNSATURATED_FATTY_ACID_METABOLIC_PROCESS	65	0.776585	1.3999	0.0204638	0.245419	1	1856
GO_POSITIVE_REGULATION_OF_LIPID_STORAGE	16	0.912767	1.40164	0.0186757	0.244924	1	879
GO_REGULATION_OF_FATTY_ACID_METABOLIC_PROCESS	64	0.77812	1.39869	0.0244233	0.244891	1	1852
GO_PROTEIN_MATURATION	207	0.70158	1.39968	0.00558659	0.244624	1	1233
GO_FATTY_ACID_DERIVATIVE_BIOSYNTHETIC_PROCESS	32	0.847891	1.3999	0.0307018	0.244552	1	1856
GO_AUTOPHAGY	315	0.680923	1.40095	0.00328587	0.244388	1	1875
GO_NEGATIVE_REGULATION_OF_ENDOCYTOSIS	30	0.842438	1.40078	0.0381232	0.244319	1	1985
GO_GASTRULATION_WITH_MOUTH_FORMING_SECOND	19	0.889803	1.39943	0.027907	0.244137	1	301
GO_POSITIVE_REGULATION_OF_INTERLEUKIN_8_PRODUCTION	40	0.828891	1.40163	0.025641	0.244041	1	1877
GO_NEGATIVE_REGULATION_OF_CYTOKINE_SECRETION	32	0.842676	1.39962	0.0397644	0.243984	1	626
GO_POSITIVE_REGULATION_OF_INFLAMMATORY_RESPONSE	81	0.758145	1.40159	0.0263819	0.24328	1	1509
GO_NEGATIVE_REGULATION_OF_PROTEIN_SECRETION	78	0.770721	1.40141	0.0238727	0.243203	1	1520
GO_TISSUE_HOMEOSTASIS	128	0.721245	1.4023	0.0110429	0.242614	1	1284
GO_CELL_ACTIVATION_INVOLVED_IN_IMMUNE_RESPONSE	110	0.739587	1.40276	0.0137672	0.241315	1	1635
GO_REGULATION_OF_MITOCHONDRIAL_MEMBRANE_POTENTIAL	45	0.810969	1.4032	0.0307263	0.240215	1	1264
GO_RETINA_HOMEOSTASIS	43	0.812306	1.40425	0.0272206	0.239882	1	1141
GO_REGULATION_OF_INTERLEUKIN_8_PRODUCTION	52	0.795602	1.4041	0.0217687	0.239688	1	1877
GO_REGULATION_OF_TRANSCRIPTION_FROM_RNA_POLYMERASE_III_PROMOTER	19	0.899642	1.40353	0.0224359	0.239588	1	924
GO_PHOSPHOLIPASE_C_ACTIVATING_G_PROTEIN_COUPLED_RECEPTOR_SIGNALING_PATHWAY	47	0.811332	1.40402	0.0245232	0.239174	1	1112
GO_MEMBRANE_PROTEIN_INTRACELLULAR_DOMAIN_PROTEOLYSIS	16	0.900599	1.40479	0.031614	0.23908	1	854
GO_EXTERNAL_SIDE_OF_PLASMA_MEMBRANE	177	0.707473	1.40521	0.00902935	0.239075	1	1700
GO_IRON_ION_TRANSPORT	40	0.821114	1.4046	0.0278184	0.239058	1	948
GO_REGULATION_OF_PROTEIN_PHOSPHATASE_TYPE_2A_ACTIVITY	22	0.892917	1.40509	0.0124805	0.238657	1	1439
GO_REGULATION_OF_PROTEIN_ACTIVATION_CASCADE	19	0.912383	1.40552	0.00615385	0.238575	1	1337
KEGG_ABC_TRANSPORTERS	34	0.833348	1.40399	0.019174	0.238394	1	1600
GO_ERYTHROCYTE_HOMEOSTASIS	64	0.789904	1.40595	0.0157895	0.238322	1	1577
KEGG_ECM_RECEPTOR_INTERACTION	72	0.772409	1.40579	0.0200753	0.23815	1	1010
GO_WATER_HOMEOSTASIS	40	0.825464	1.40718	0.0183616	0.233562	1	857
KEGG_PATHWAYS_IN_CANCER	274	0.692997	1.4075	0.00216685	0.23309	1	1762
KEGG_BLADDER_CANCER	38	0.832371	1.40856	0.018598	0.229114	1	715
GO_APOPTOTIC_CELL_CLEARANCE	23	0.871427	1.40953	0.0312012	0.228375	1	389
GO_REGULATION_OF_INTERLEUKIN_6_PRODUCTION	82	0.753184	1.40893	0.0153846	0.228244	1	2337
GO_PHOSPHATIDYLSERINE_BINDING	23	0.870644	1.40953	0.0377644	0.227471	1	119
GO_POSITIVE_REGULATION_OF_CELL_CYCLE_G1_S_PHASE_TRANSITION	24	0.884231	1.40932	0.0195783	0.22747	1	1065
GO_POSITIVE_REGULATION_OF_PROTEIN_POLYMERIZATION	71	0.773689	1.41017	0.0146862	0.226545	1	629
GO_BASOLATERAL_PLASMA_MEMBRANE	160	0.722046	1.41178	0.00470588	0.223764	1	1864
GO_POSITIVE_REGULATION_OF_COAGULATION	19	0.898742	1.41269	0.0108865	0.223692	1	405
GO_REGULATION_OF_CELL_JUNCTION_ASSEMBLY	56	0.791446	1.411	0.0259563	0.223565	1	1283
GO_LYTIC_VACUOLE	426	0.689137	1.4129	0	0.223545	1	1806
GO_EXOCYST	15	0.921463	1.4131	0.0154083	0.223497	1	1128
GO_HOMEOSTASIS_OF_NUMBER_OF_CELLS	159	0.720646	1.41381	0.00721154	0.223372	1	1352
GO_FATTY_ACID_DERIVATIVE_METABOLIC_PROCESS	55	0.800552	1.41126	0.0187416	0.223322	1	1856
GO_RESPONSE_TO_METAL_ION	256	0.697985	1.41168	0.00656455	0.223252	1	1926
GO_CELL_JUNCTION_ASSEMBLY	117	0.739218	1.41263	0.0111111	0.222986	1	2280
GO_PROTEIN_COMPLEX_INVOLVED_IN_CELL_ADHESION	29	0.852877	1.41371	0.0221893	0.222867	1	1577
GO_MITOCHONDRION_ORGANIZATION	493	0.677618	1.41157	0	0.222709	1	1489
GO_REGULATION_OF_PROTEIN_POLYMERIZATION	141	0.723151	1.41247	0.0119904	0.222662	1	2699
GO_PHAGOCYTIC_VESICLE	73	0.77097	1.41355	0.0171731	0.22249	1	2123
GO_RUFFLE	143	0.728181	1.41427	0.00828402	0.222206	1	2399
GO_REGULATION_OF_ANION_TRANSMEMBRANE_TRANSPORT	22	0.881151	1.41237	0.0211039	0.222133	1	1175
GO_LIPOPOLYSACCHARIDE_MEDIATED_SIGNALING_PATHWAY	30	0.865717	1.41466	0.0213415	0.221452	1	492
GO_REGULATION_OF_LIGASE_ACTIVITY	116	0.736199	1.41574	0.0110701	0.217222	1	1315
GO_ORGANIC_ANION_TRANSMEMBRANE_TRANSPORTER_ACTIVITY	119	0.735686	1.41731	0.00373599	0.212142	1	1649
GO_RESPONSE_TO_ANTIBIOTIC	41	0.82713	1.41724	0.0245665	0.211508	1	743
GO_EMBRYONIC_HEMOPOIESIS	17	0.914534	1.41855	0.0225443	0.210564	1	759
GO_ORGANIC_HYDROXY_COMPOUND_CATABOLIC_PROCESS	48	0.813428	1.41834	0.027248	0.21045	1	1599
GO_REGULATION_OF_LIPID_STORAGE	35	0.846024	1.41818	0.0180807	0.210193	1	879
GO_POSITIVE_REGULATION_OF_CARBOHYDRATE_METABOLIC_PROCESS	57	0.795919	1.41888	0.0176152	0.210115	1	895
GO_POSITIVE_REGULATION_OF_LEUKOCYTE_CHEMOTAXIS	64	0.792463	1.41814	0.0150068	0.209415	1	1687
GO_ACID_SECRETION	38	0.829664	1.41983	0.0228571	0.208774	1	743
GO_RESPONSE_TO_IONIZING_RADIATION	127	0.741335	1.41964	0.00596659	0.208596	1	1687
GO_ENDODERM_DEVELOPMENT	56	0.804176	1.41951	0.011065	0.208297	1	460
GO_NEGATIVE_REGULATION_OF_CELL_JUNCTION_ASSEMBLY	19	0.926185	1.42131	0.00941915	0.2078	1	1283
GO_MRNA_PROCESSING	358	0.694359	1.42156	0	0.207596	1	1626
GO_ORGANIC_HYDROXY_COMPOUND_TRANSPORT	105	0.762728	1.42035	0.00872818	0.207202	1	2096
KEGG_HEMATOPOIETIC_CELL_LINEAGE	71	0.776333	1.42126	0.0227273	0.206942	1	1018
GO_RUFFLE_MEMBRANE	70	0.773413	1.42117	0.0195312	0.206351	1	2337
GO_REGULATION_OF_HUMORAL_IMMUNE_RESPONSE	27	0.86212	1.42075	0.0250368	0.206295	1	1700
GO_RESPONSE_TO_KETONE	138	0.735473	1.42104	0.00588235	0.206016	1	1481
GO_NEGATIVE_REGULATION_OF_FIBROBLAST_PROLIFERATION	23	0.894971	1.42312	0.0133531	0.204416	1	600
GO_COATED_VESICLE	181	0.720866	1.42277	0.00813953	0.204041	1	1281
GO_CELLULAR_RESPONSE_TO_CARBOHYDRATE_STIMULUS	60	0.8024	1.42301	0.0083682	0.203863	1	858
GO_PROTEOGLYCAN_BIOSYNTHETIC_PROCESS	44	0.808111	1.42268	0.0230548	0.203464	1	811
GO_PROTEIN_N_TERMINUS_BINDING	93	0.761003	1.42391	0.0153061	0.201834	1	1395
GO_REGULATION_OF_GLYCOPROTEIN_METABOLIC_PROCESS	34	0.835941	1.42555	0.0211161	0.19971	1	1604
GO_RESPONSE_TO_FUNGUS	30	0.858424	1.42463	0.0170015	0.199675	1	585
GO_CELL_JUNCTION_ORGANIZATION	150	0.726061	1.42621	0.00478469	0.198768	1	2280
GO_AMINO_ACID_TRANSMEMBRANE_TRANSPORTER_ACTIVITY	57	0.806271	1.42555	0.0133869	0.198718	1	1562
KEGG_ARACHIDONIC_ACID_METABOLISM	34	0.839859	1.42538	0.025825	0.19835	1	1829
GO_REGULATION_OF_PEPTIDASE_ACTIVITY	256	0.706822	1.42608	0.00220751	0.198228	1	1675
GO_NEURAL_RETINA_DEVELOPMENT	35	0.837864	1.42536	0.0223881	0.197413	1	1322
GO_REGULATION_OF_ADHERENS_JUNCTION_ORGANIZATION	43	0.827174	1.42739	0.0170697	0.195704	1	1283
GO_SOLUTE_SODIUM_SYMPORTER_ACTIVITY	32	0.852592	1.42725	0.0208955	0.195264	1	1490
GO_ERYTHROCYTE_DEVELOPMENT	20	0.894515	1.428	0.015748	0.193938	1	1231
GO_PLASMA_MEMBRANE_RAFT	66	0.784006	1.42867	0.0159574	0.193073	1	1763
GO_EXTRACELLULAR_MATRIX	285	0.702627	1.4291	0.00326087	0.192188	1	1233
GO_MOTILE_CILIUM	67	0.789904	1.42866	0.0143791	0.192102	1	1784
GO_REGULATION_OF_NEUTROPHIL_MIGRATION	24	0.894177	1.43052	0.0135952	0.189054	1	1013
GO_ACTIVE_TRANSMEMBRANE_TRANSPORTER_ACTIVITY	250	0.706182	1.43129	0.00110619	0.188902	1	1649
GO_REGULATION_OF_NECROTIC_CELL_DEATH	20	0.903807	1.43038	0.00619195	0.188593	1	52
GO_SYNAPSIS	19	0.910739	1.43121	0.0200927	0.188225	1	802
GO_LIPID_PARTICLE	49	0.807336	1.43027	0.0123796	0.188177	1	2010
GO_HYDROLASE_ACTIVITY_ACTING_ON_CARBON_NITROGEN_BUT_NOT_PEPTIDE_BONDS	117	0.746443	1.43202	0.0111386	0.187774	1	1555
GO_REGULATION_OF_LEUKOCYTE_MIGRATION	119	0.743238	1.43108	0.00993789	0.187681	1	1065
GO_CELLULAR_RESPONSE_TO_PROSTAGLANDIN_STIMULUS	19	0.911665	1.43188	0.0115702	0.187397	1	1020
GO_UDP_GLYCOSYLTRANSFERASE_ACTIVITY	88	0.765627	1.43262	0.0112923	0.186346	1	1738
GO_REGULATION_OF_REACTIVE_OXYGEN_SPECIES_METABOLIC_PROCESS	127	0.742887	1.43336	0.00859951	0.18413	1	1356
GO_POSITIVE_REGULATION_OF_INTERLEUKIN_6_PRODUCTION	53	0.814934	1.43373	0.0109739	0.183551	1	2430
KEGG_FOCAL_ADHESION	173	0.720452	1.4356	0.00466744	0.182459	1	2181
GO_P53_BINDING	57	0.81475	1.43483	0.0181564	0.181843	1	759
GO_POSITIVE_REGULATION_OF_EXTRINSIC_APOPTOTIC_SIGNALING_PATHWAY	45	0.819832	1.43464	0.0138122	0.181609	1	1675
GO_CYTOKINE_PRODUCTION	101	0.767119	1.4356	0.00865266	0.181437	1	2679
GO_POSITIVE_REGULATION_OF_INTERFERON_GAMMA_PRODUCTION	54	0.807549	1.43444	0.020979	0.181391	1	1426
GO_POSITIVE_REGULATION_OF_WOUND_HEALING	37	0.861425	1.43547	0.00445104	0.180987	1	405
GO_POSITIVE_REGULATION_OF_CYTOKINE_PRODUCTION	311	0.700021	1.43534	0	0.180593	1	1687
GO_NEGATIVE_REGULATION_OF_SECRETION	136	0.738682	1.43685	0.00609756	0.180136	1	1687
GO_MRNA_3_END_PROCESSING	67	0.791774	1.43638	0.0254958	0.179917	1	195
GO_CELL_SUBSTRATE_JUNCTION_ASSEMBLY	38	0.834299	1.43671	0.0235294	0.179664	1	1010
GO_CARBOHYDRATE_BIOSYNTHETIC_PROCESS	98	0.758727	1.43795	0.0140665	0.177583	1	680
GO_POSITIVE_REGULATION_OF_FAT_CELL_DIFFERENTIATION	40	0.839714	1.43773	0.0200286	0.177364	1	1267
GO_CELLULAR_TRANSITION_METAL_ION_HOMEOSTASIS	60	0.797672	1.43901	0.0150273	0.175124	1	912
GO_REGULATION_OF_WOUND_HEALING	95	0.762825	1.43938	0.00632111	0.174604	1	1977
GO_PEPTIDE_CROSS_LINKING	18	0.92375	1.43893	0.0140187	0.17434	1	897
GO_POSITIVE_REGULATION_OF_ERYTHROCYTE_DIFFERENTIATION	21	0.926687	1.44056	0.00313972	0.173709	1	759
GO_NEGATIVE_REGULATION_OF_CYTOKINE_PRODUCTION	173	0.731815	1.44043	0.0034642	0.173156	1	1741
GO_RESPONSE_TO_PROSTAGLANDIN_E	20	0.909938	1.44027	0.019432	0.172806	1	1020
KEGG_ALZHEIMERS_DISEASE	138	0.743947	1.44004	0.00483092	0.17269	1	2050
GO_PROTEIN_IMPORT	130	0.742337	1.44305	0.00364078	0.165673	1	458
GO_REGULATION_OF_ERYTHROCYTE_DIFFERENTIATION	34	0.862392	1.44462	0.00581395	0.165403	1	2017
GO_REGULATION_OF_EXTRINSIC_APOPTOTIC_SIGNALING_PATHWAY	127	0.749814	1.44391	0.00742574	0.165002	1	1675
GO_MITOGEN_ACTIVATED_PROTEIN_KINASE_BINDING	22	0.894477	1.44443	0.011041	0.16499	1	1180
GO_NUCLEOBASE_METABOLIC_PROCESS	32	0.867506	1.44304	0.0117302	0.164687	1	669
GO_AMINO_ACID_TRANSMEMBRANE_TRANSPORT	50	0.810562	1.44377	0.0149864	0.16453	1	1562
GO_ORGANIC_ACID_TRANSMEMBRANE_TRANSPORT	79	0.77929	1.44364	0.00909091	0.164062	1	1632
GO_POSITIVE_REGULATION_OF_REACTIVE_OXYGEN_SPECIES_METABOLIC_PROCESS	73	0.797211	1.44439	0.00788436	0.164019	1	1356
GO_TRANSITION_METAL_ION_HOMEOSTASIS	84	0.776557	1.44558	0.0101266	0.163842	1	1445
GO_DOUBLE_STRANDED_RNA_BINDING	53	0.811322	1.44536	0.0125698	0.163682	1	1280
KEGG_LEISHMANIA_INFECTION	63	0.798427	1.44826	0.0146277	0.162797	1	1267
GO_HOMOLOGOUS_CHROMOSOME_SEGREGATION	26	0.897963	1.44817	0.0106545	0.16189	1	802
GO_VESICLE_LUMEN	73	0.79024	1.45139	0.00508906	0.161439	1	658
GO_POSITIVE_REGULATION_OF_CELL_CYCLE_PHASE_TRANSITION	58	0.806507	1.44807	0.0126227	0.161165	1	1264
GO_POSITIVE_REGULATION_OF_CYTOKINE_SECRETION	75	0.781792	1.45178	0.0140845	0.161023	1	879
GO_REGULATION_OF_RESPONSE_TO_BIOTIC_STIMULUS	181	0.719797	1.44711	0.00232558	0.160685	1	1846
GO_REGULATION_OF_TUMOR_NECROSIS_FACTOR_SUPERFAMILY_CYTOKINE_PRODUCTION	87	0.77564	1.4466	0.00260756	0.160675	1	1479
GO_REGULATION_OF_LEUKOCYTE_CHEMOTAXIS	76	0.787153	1.45102	0.00265604	0.160547	1	1687
GO_REGULATION_OF_OXIDOREDUCTASE_ACTIVITY	67	0.796653	1.45132	0.00556328	0.160506	1	1310
GO_ATPASE_ACTIVITY_COUPLED	272	0.710612	1.44688	0	0.160431	1	1600
GO_ENDOCYTOSIS	412	0.699319	1.44748	0	0.160232	1	1482
GO_NEGATIVE_REGULATION_OF_IMMUNE_SYSTEM_PROCESS	286	0.715271	1.44804	0.00217391	0.160145	1	1729
GO_MYELOID_CELL_HOMEOSTASIS	78	0.785171	1.45085	0.00527009	0.160119	1	1352
GO_MONOSACCHARIDE_BINDING	53	0.822028	1.45037	0.00958904	0.159696	1	1319
GO_REGULATION_OF_FIBROBLAST_PROLIFERATION	66	0.806234	1.44956	0.00795756	0.159586	1	1005
GO_ATPASE_ACTIVITY_COUPLED_TO_MOVEMENT_OF_SUBSTANCES	96	0.7674	1.4494	0.0100125	0.159207	1	1600
GO_PROTEIN_SERINE_THREONINE_KINASE_ACTIVATOR_ACTIVITY	16	0.953872	1.45022	0.00157978	0.159132	1	135
GO_SINGLE_STRANDED_DNA_BINDING	73	0.810719	1.44803	0.00657895	0.159094	1	802
GO_ACUTE_PHASE_RESPONSE	28	0.893722	1.45084	0.00444444	0.158989	1	787
GO_DEFENSE_RESPONSE_TO_GRAM_NEGATIVE_BACTERIUM	33	0.858384	1.45	0.012931	0.158879	1	585
GO_MULTICELLULAR_ORGANISMAL_HOMEOSTASIS	194	0.732196	1.45296	0.00115075	0.157463	1	1284
GO_MONOCARBOXYLIC_ACID_BINDING	34	0.864659	1.45396	0.0102489	0.154441	1	1156
GO_HEPARIN_BINDING	100	0.775737	1.45459	0.00374065	0.15325	1	1233
GO_REGULATION_OF_TOLL_LIKE_RECEPTOR_SIGNALING_PATHWAY	43	0.835986	1.45514	0.0126404	0.151986	1	1577
GO_SECRETORY_GRANULE_LUMEN	54	0.819599	1.45612	0.00688705	0.151891	1	658
GO_REGULATION_OF_CYTOKINE_PRODUCTION	458	0.697874	1.45579	0	0.150718	1	1687
GO_RESPONSE_TO_ISCHEMIA	24	0.897726	1.45611	0.00609756	0.150656	1	2
KEGG_REGULATION_OF_ACTIN_CYTOSKELETON	181	0.741839	1.45702	0.00340136	0.149501	1	1611
GO_ANTIGEN_PROCESSING_AND_PRESENTATION_OF_EXOGENOUS_PEPTIDE_ANTIGEN_VIA_MHC_CLASS_I	54	0.826031	1.45818	0.00698324	0.148628	1	1975
GO_NEGATIVE_REGULATION_OF_ESTABLISHMENT_OF_PROTEIN_LOCALIZATION	165	0.738325	1.45992	0.00705882	0.148382	1	1520
GO_MONOCARBOXYLIC_ACID_TRANSMEMBRANE_TRANSPORTER_ACTIVITY	28	0.886644	1.45791	0.00453172	0.148352	1	1636
GO_ORGANELLE_DISASSEMBLY	151	0.74166	1.4604	0.00475624	0.147825	1	1875
GO_RESPONSE_TO_MOLECULE_OF_BACTERIAL_ORIGIN	273	0.718283	1.45986	0.0010917	0.147357	1	1727
GO_POSITIVE_REGULATION_OF_CYTOKINE_BIOSYNTHETIC_PROCESS	52	0.807224	1.45786	0.0168303	0.147307	1	2337
GO_POSITIVE_REGULATION_OF_CELL_SUBSTRATE_ADHESION	82	0.786286	1.45977	0.00907912	0.146332	1	631
GO_POSITIVE_REGULATION_OF_PROTEIN_SECRETION	158	0.736693	1.45967	0.00238663	0.145476	1	938
GO_RESPONSE_TO_PROSTAGLANDIN	23	0.905579	1.45939	0.00980392	0.145222	1	1020
GO_REGULATION_OF_PROTEIN_SECRETION	291	0.713802	1.46185	0	0.143174	1	1687
GO_EXTRACELLULAR_MATRIX_DISASSEMBLY	53	0.8175	1.46277	0.0151724	0.141128	1	1233
GO_CYTOPLASMIC_VESICLE_PART	443	0.707913	1.4633	0	0.140239	1	1281
GO_GLYCOSAMINOGLYCAN_BINDING	129	0.757295	1.46445	0.00488998	0.136987	1	1443
GO_REGULATION_OF_VESICLE_MEDIATED_TRANSPORT	367	0.708148	1.46535	0	0.134615	1	2255
KEGG_PRION_DISEASES	30	0.88214	1.46861	0.00454545	0.127014	1	585
GO_NEGATIVE_REGULATION_OF_TRANSPORT	332	0.71268	1.46766	0	0.126919	1	1687
KEGG_SMALL_CELL_LUNG_CANCER	78	0.796776	1.46859	0.00527009	0.125846	1	1267
GO_GRANULOCYTE_MIGRATION	50	0.839256	1.46843	0.0028169	0.125322	1	856
GO_PHAGOCYTOSIS	157	0.751161	1.46946	0	0.12509	1	1482
GO_CELLULAR_CARBOHYDRATE_METABOLIC_PROCESS	112	0.765553	1.47064	0.00611995	0.123356	1	1970
GO_REGULATION_OF_GRANULOCYTE_CHEMOTAXIS	29	0.893096	1.47025	0.00453858	0.123292	1	1003
GO_CYTOPLASMIC_STRESS_GRANULE	29	0.89517	1.47223	0.00875912	0.119665	1	96
KEGG_NOD_LIKE_RECEPTOR_SIGNALING_PATHWAY	50	0.830231	1.47196	0.00408719	0.119306	1	906
GO_SUBSTRATE_ADHESION_DEPENDENT_CELL_SPREADING	36	0.87596	1.47561	0.00434153	0.113049	1	615
GO_HEMATOPOIETIC_PROGENITOR_CELL_DIFFERENTIATION	83	0.790878	1.47533	0.00506329	0.113032	1	1729
GO_LEUKOCYTE_MIGRATION	208	0.737655	1.47505	0	0.112729	1	1687
GO_RESPONSE_TO_WOUNDING	421	0.716094	1.47614	0	0.112434	1	1627
GO_HIPPO_SIGNALING	25	0.894298	1.47488	0.009375	0.112052	1	42
GO_RECEPTOR_SIGNALING_PROTEIN_SERINE_THREONINE_KINASE_ACTIVITY	81	0.802443	1.47679	0.00262812	0.111427	1	1727
GO_POSITIVE_REGULATION_OF_PHAGOCYTOSIS	38	0.870303	1.47779	0.00865801	0.110722	1	1371
KEGG_RETINOL_METABOLISM	19	0.92721	1.47745	0.00786164	0.110442	1	973
GO_REGULATION_OF_RNA_SPLICING	81	0.798499	1.47834	0.00526316	0.110176	1	23
GO_IMMUNE_EFFECTOR_PROCESS	363	0.721575	1.47968	0	0.108202	1	1727
GO_RNA_POLYMERASE_II_CORE_PROMOTER_SEQUENCE_SPECIFIC_DNA_BINDING	47	0.847624	1.47962	0.00423131	0.107184	1	1028
GO_REGULATION_OF_PHOSPHOPROTEIN_PHOSPHATASE_ACTIVITY	51	0.828253	1.48233	0.00672043	0.104748	1	1439
GO_ANTIGEN_PROCESSING_AND_PRESENTATION	166	0.753489	1.48112	0.00116279	0.104572	1	1975
GO_GLYCOPROTEIN_BINDING	79	0.801928	1.48196	0.00385109	0.104503	1	951
GO_POSITIVE_REGULATION_OF_RESPONSE_TO_EXTERNAL_STIMULUS	228	0.744351	1.48157	0	0.104377	1	1727
GO_SULFUR_COMPOUND_BINDING	169	0.749161	1.48444	0.00115075	0.0990883	1	1784
GO_ACUTE_INFLAMMATORY_RESPONSE	54	0.849523	1.48506	0.00547945	0.098491	0.999	1203
GO_HOMEOSTASIS_OF_NUMBER_OF_CELLS_WITHIN_A_TISSUE	29	0.909959	1.48605	0.00145773	0.0976812	0.999	924
GO_TRANSLATION_INITIATION_FACTOR_BINDING	24	0.921018	1.48574	0.00305344	0.0974839	0.999	96
GO_CHROMOSOME_ORGANIZATION_INVOLVED_IN_MEIOTIC_CELL_CYCLE	29	0.901292	1.48707	0.00451807	0.0957982	0.999	802
GO_REGULATION_OF_DEFENSE_RESPONSE_TO_VIRUS	149	0.75656	1.48907	0	0.0945538	0.999	1846
GO_POSITIVE_REGULATION_OF_ENDOCYTOSIS	91	0.795166	1.48842	0.00123762	0.0942224	0.999	1479
GO_TOLL_LIKE_RECEPTOR_SIGNALING_PATHWAY	80	0.806048	1.48883	0.00259067	0.0940795	0.999	991
GO_DEFENSE_RESPONSE_TO_BACTERIUM	128	0.772746	1.48807	0.00118343	0.0940493	0.999	1371
GO_MEIOTIC_CHROMOSOME_SEGREGATION	38	0.877483	1.49025	0.00576369	0.0936164	0.999	802
GO_OVULATION_CYCLE	81	0.801493	1.48999	0	0.0932609	0.999	1675
GO_MEMBRANE_PROTEIN_PROTEOLYSIS	34	0.902552	1.49116	0.00143266	0.0920907	0.999	854
GO_RESPONSE_TO_ACID_CHEMICAL	230	0.734231	1.49275	0.00111235	0.0903084	0.999	1983
GO_LIPID_LOCALIZATION	190	0.752549	1.49232	0.0011655	0.0902209	0.999	1682
GO_RESPONSE_TO_BACTERIUM	368	0.729499	1.49643	0	0.0888835	0.989	1687
GO_REGULATION_OF_VASCULATURE_DEVELOPMENT	180	0.761379	1.49637	0.00112994	0.0876628	0.989	1940
GO_POSITIVE_REGULATION_OF_SUBSTRATE_ADHESION_DEPENDENT_CELL_SPREADING	22	0.93675	1.49603	0.00157729	0.0874877	0.989	52
GO_CELLULAR_RESPONSE_TO_INTERLEUKIN_1	61	0.82963	1.49812	0.00801068	0.0868626	0.988	1074
GO_RESPONSE_TO_TRANSITION_METAL_NANOPARTICLE	110	0.79168	1.49772	0	0.0866192	0.988	1742
GO_ANTIGEN_PROCESSING_AND_PRESENTATION_OF_PEPTIDE_ANTIGEN	143	0.773864	1.49596	0	0.0863947	0.989	1975
GO_TRANSCRIPTION_FROM_RNA_POLYMERASE_I_PROMOTER	34	0.900231	1.50154	0.00431035	0.0863608	0.985	28
GO_MACROMITOPHAGY	106	0.789362	1.49577	0.00246609	0.0857304	0.99	2035
GO_POSITIVE_REGULATION_OF_RESPONSE_TO_WOUNDING	120	0.78729	1.50236	0	0.0855798	0.984	1509
GO_CELLULAR_DEFENSE_RESPONSE	44	0.873033	1.50151	0.00282486	0.0848497	0.985	863
GO_PHOSPHOLIPASE_ACTIVITY	69	0.820171	1.49568	0.0026178	0.0847603	0.991	1443
GO_WOUND_HEALING	351	0.725843	1.50048	0	0.0846319	0.987	1627
GO_REGULATION_OF_DEFENSE_RESPONSE_TO_VIRUS_BY_HOST	99	0.805598	1.49956	0.00250627	0.0843541	0.988	1489
GO_POSITIVE_REGULATION_OF_CELLULAR_AMIDE_METABOLIC_PROCESS	89	0.81437	1.50125	0.00260756	0.0840169	0.986	773
GO_MEMBRANE_PROTEIN_ECTODOMAIN_PROTEOLYSIS	21	0.937686	1.49562	0.00151286	0.0836739	0.991	32
GO_POSITIVE_REGULATION_OF_TUMOR_NECROSIS_FACTOR_SUPERFAMILY_CYTOKINE_PRODUCTION	52	0.850401	1.50042	0.00140449	0.0833422	0.987	1371
GO_CYTOSOLIC_RIBOSOME	76	-0.803192	-1.75844	0	0.0806549	0.1	798
GO_LIPASE_ACTIVITY	81	0.810167	1.50478	0.00251889	0.0801257	0.977	1443
GO_PLATELET_ALPHA_GRANULE_LUMEN	40	0.872538	1.50591	0.00278164	0.0789985	0.973	565
GO_PLATELET_ACTIVATION	125	0.779409	1.50863	0.00121507	0.0747172	0.96	1611
GO_HEMOSTASIS	238	0.746129	1.51064	0	0.0740159	0.951	1627
GO_XENOPHAGY	77	0.83159	1.50837	0	0.0737677	0.964	1489
GO_PEPTIDASE_ACTIVATOR_ACTIVITY	31	0.90781	1.51041	0.00142857	0.0730446	0.951	1009
GO_ACTIVATION_OF_IMMUNE_RESPONSE	357	0.731661	1.50992	0	0.0727736	0.953	1371
GO_POSITIVE_REGULATION_OF_PROTEOLYSIS	313	0.741126	1.51397	0	0.0664844	0.924	1116
GO_SECRETORY_GRANULE_MEMBRANE	58	0.839129	1.52158	0	0.0658902	0.86	1265
GO_POSITIVE_REGULATION_OF_CHEMOTAXIS	96	0.812781	1.5228	0.00127226	0.06481	0.85	1703
GO_POSITIVE_REGULATION_OF_IMMUNE_RESPONSE	461	0.724954	1.51519	0	0.064664	0.916	1727
GO_REGULATION_OF_BODY_FLUID_LEVELS	373	0.735401	1.5215	0	0.0641945	0.86	1639
GO_COLLAGEN_BINDING	51	0.855435	1.51604	0.00275482	0.0639816	0.911	683
GO_SECRETION_BY_CELL	363	0.740155	1.52012	0	0.0635866	0.871	1936
GO_POSITIVE_REGULATION_OF_VASCULATURE_DEVELOPMENT	105	0.795829	1.5212	0.00128205	0.0630785	0.861	1892
GO_DNA_GEOMETRIC_CHANGE	74	0.834812	1.51855	0.00260756	0.0622282	0.884	31
GO_RESPONSE_TO_INTERLEUKIN_1	83	0.828485	1.52008	0	0.0620564	0.872	1074
GO_SECRETORY_VESICLE	314	0.739902	1.51818	0	0.0615897	0.892	1680
GO_REGULATION_OF_IMMUNE_EFFECTOR_PROCESS	330	0.741199	1.5198	0	0.0609951	0.874	1700
GO_POSITIVE_REGULATION_OF_PEPTIDASE_ACTIVITY	125	0.799541	1.52515	0	0.0608008	0.828	1116
GO_CELLULAR_RESPONSE_TO_FATTY_ACID	40	0.888636	1.51793	0.00144092	0.0607996	0.893	1034
GO_ANTIGEN_PROCESSING_AND_PRESENTATION_OF_PEPTIDE_ANTIGEN_VIA_MHC_CLASS_I	76	0.836448	1.52776	0.00131062	0.0565604	0.802	1580
GO_RNA_POLYADENYLATION	26	0.941445	1.52854	0.00153139	0.0564788	0.792	195
GO_SECRETORY_GRANULE	234	0.753049	1.53198	0.00111982	0.0510102	0.747	1265
GO_REGULATION_OF_RESPONSE_TO_WOUNDING	310	0.746296	1.53383	0	0.0492426	0.723	1687
GO_CELLULAR_COMPONENT_DISASSEMBLY	428	0.744015	1.53597	0	0.0477733	0.674	2035
GO_REGULATION_OF_INFLAMMATORY_RESPONSE	218	0.759426	1.53561	0	0.0468951	0.686	1687
GO_CARBOHYDRATE_BINDING	179	0.777236	1.53972	0	0.0463634	0.622	1391
GO_ORGANIC_ACID_BINDING	131	0.791624	1.53771	0.00243013	0.0460657	0.654	1500
GO_ENDOPLASMIC_RETICULUM_GOLGI_INTERMEDIATE_COMPARTMENT	85	0.831904	1.53957	0	0.0445688	0.624	171
GO_RESPONSE_TO_FATTY_ACID	63	0.86689	1.54566	0	0.0438962	0.527	1357
GO_DEFENSE_RESPONSE_TO_OTHER_ORGANISM	319	0.762492	1.54552	0	0.0417014	0.527	1402
GO_REGULATION_OF_CYTOKINE_SECRETION	112	0.808198	1.5444	0	0.0411671	0.54	879
GO_REGULATED_EXOCYTOSIS	166	0.787946	1.54386	0	0.0401397	0.547	1998
GO_EXOCYTOSIS	241	0.768107	1.55039	0	0.0363881	0.44	1998
GO_SECRETION	428	0.746562	1.55357	0	0.0333326	0.401	1936
GO_PLATELET_ALPHA_GRANULE	58	0.878345	1.55743	0	0.0289323	0.344	964
GO_PATTERN_RECOGNITION_RECEPTOR_SIGNALING_PATHWAY	98	0.825424	1.5624	0.0025	0.0247464	0.292	991
GO_DNA_DEPENDENT_ATPASE_ACTIVITY	76	0.852308	1.56728	0	0.0235196	0.249	802
GO_REGULATION_OF_ENDOCYTOSIS	161	0.803534	1.56854	0	0.0234747	0.23	1479
GO_REGULATION_OF_PHAGOCYTOSIS	55	0.883744	1.57039	0	0.0231216	0.207	1371
GO_INFLAMMATORY_RESPONSE	343	0.763787	1.57322	0	0.0220546	0.184	1687
GO_DRUG_BINDING	81	0.840682	1.56695	0	0.0219972	0.25	1395
GO_POSITIVE_REGULATION_OF_DEFENSE_RESPONSE	298	0.77683	1.58674	0	0.0140538	0.095	1577
GO_INNATE_IMMUNE_RESPONSE_ACTIVATING_CELL_SURFACE_RECEPTOR_SIGNALING_PATHWAY	97	0.853593	1.58635	0	0.0127362	0.097	596
GO_PLATELET_DEGRANULATION	82	0.85966	1.596	0	0.00998072	0.06	658
GO_REGULATION_OF_INNATE_IMMUNE_RESPONSE	296	0.792315	1.61202	0	0.00308951	0.017	1577
GO_INNATE_IMMUNE_RESPONSE	389	0.796441	1.6373	0	0.00218089	0.004	1406
GO_ACTIVATION_OF_INNATE_IMMUNE_RESPONSE	184	0.827848	1.62388	0	0.00190483	0.007	991
GO_RNA_3_END_PROCESSING	88	0.87905	1.62157	0	0.00152386	0.007	195
GO_POSITIVE_REGULATION_OF_INNATE_IMMUNE_RESPONSE	217	0.81514	1.63106	0	0.00145392	0.004	1577
GO_REGULATION_OF_CELL_SHAPE	119	0.868641	1.66617	0	0.00108827	0.001	816
